# Supplementary material
Source: publisher figshare collection journal article supplement (https://acs.figshare.com/ndownloader/files/5921937)
Supplement: Supplementary file 1 [file 5921937]

# Capture-Collapse Heterocyclization: 1,3-Diazepanes by C-N Reductive Elimination from Rhodacyclopentanones

Niall G. McCreanor,<sup>§</sup> Steven Stanton,<sup>§</sup> and John F. Bower\*<sup>§</sup>

<sup>§</sup>*School of Chemistry, University of Bristol, Bristol, BS8 1TS, UK*

## **Supporting Information**

### **Table of Contents**

|                                                                                    |      |
|------------------------------------------------------------------------------------|------|
| General Experimental Details -----                                                 | S1   |
| Experimental Procedures and Data -----                                             | S2   |
| General Procedures -----                                                           | S2   |
| “Capture-Collapse” Substrates and Products -----                                   | S3   |
| Selected Reaction Optimization Tables -----                                        | S56  |
| Further Oxidative Insertion Regioselectivity Experiments-----                      | S59  |
| Copies of <sup>1</sup> H and <sup>13</sup> C NMR spectra for novel compounds ----- | S65  |
| References -----                                                                   | S144 |

**General Experimental Details.** Starting materials sourced from commercial suppliers were used as received unless otherwise stated. Dry solvents, where necessary, were obtained by distillation using standard procedures or by passage through a column of anhydrous alumina using equipment from Anhydrous Engineering based on the Grubb's design.<sup>1</sup> The removal of solvents *in vacuo* was achieved using both a Büchi rotary evaporator (bath temperatures up to 40 °C) at a pressure of either 15 mmHg (diaphragm pump) or 0.1 mmHg (oil pump), as appropriate, and a high vacuum line at r.t.. Reactions requiring anhydrous conditions were run under an atmosphere of dry nitrogen or argon; glassware was either flame dried immediately prior to use or placed in an oven (200 °C) for at least 2 h and allowed to cool either in a desiccator or under an atmosphere of nitrogen or argon; liquid reagents, solutions or solvents were added *via* syringe through rubber septa. Commercially available Merck Kieselgel 60F<sub>254</sub> aluminium backed plates were used for TLC analysis. Visualization was achieved by either UV fluorescence or basic KMnO<sub>4</sub> solution and heat. Flash column chromatography (FCC) was performed using silica gel (Aldrich 40-63 µm, 230-400 mesh). The crude material was applied to the column as a solution in the corresponding solvent system, CH<sub>2</sub>Cl<sub>2</sub>, or by pre-adsorption onto silica, as appropriate. Melting points were determined using a Reichert melting point table and temperature controller and are uncorrected. Infra-red spectra were recorded in the range 4000-600 cm<sup>-1</sup> on a Perkin Elmer Spectrum either as neat films or solids compressed onto a diamond window. Abbreviations used are: w (weak), m (medium) or s (strong). NMR spectra were recorded using either a Varian 400 MHz or JOEL ECS 400 MHz spectrometer. Chemical shifts (δ) are quoted in parts per million (ppm), coupling constants (*J*) are given in Hz to the nearest 0.5 Hz. Other abbreviations used are s (singlet), d (doublet), t (triplet), m (multiplet) and br (broad). <sup>1</sup>H and <sup>13</sup>C NMR spectra were referenced to the appropriate residual solvent peak. Assignments of <sup>1</sup>H NMR and <sup>13</sup>C NMR signals were made, where possible, using COSY, DEPT<sup>135</sup>, HSQC, HMBC and NOE experiments. Where mixtures of products (*e.g.* diastereomers, regioisomers or 8 vs 9) have been isolated together, they have been characterized separately where possible. *Numbering systems for NMR signal assignments are specified on the structure and are not related to those used for the compound names.* Mass spectra were determined by the University of Bristol mass spectrometry service by either electron impact (EI<sup>+</sup>) or chemical ionization (CI<sup>+</sup>) using a Fisons VG Analytical Autospec spectrometer, or by electrospray ionization (ESI<sup>+</sup>) using a Brüker Daltonics Apex IV spectrometer. Chiral SFC was performed using the racemate as a standard on an Agilent 1290 Infinity system equipped with a quaternary pump, diode array detector and column thermostat under the conditions specified in each case.

### **General procedure A for the formation of ureas from isocyanates**

To a solution of amine (110 mol%) and NEt<sub>3</sub> (200 mol%) in CH<sub>2</sub>Cl<sub>2</sub> (0.3 M) at 0 °C was added the specified isocyanate (100 mol%). The reaction mixture was warmed to r.t. and stirred for the specified time (1-18 h). The solution was diluted with CH<sub>2</sub>Cl<sub>2</sub> (3 mL/mmol) and washed with water (5 mL/mmol), aq. 1 M HCl (5 mL/mmol), sat. aq. NaHCO<sub>3</sub> (5 mL/mmol) and brine (5 mL/mmol). The organic layer was dried over Na<sub>2</sub>SO<sub>4</sub> and concentrated *in vacuo*. The product was purified by flash column chromatography, under the conditions noted, to afford the title compound.

### **General procedure B for the carbonylative cyclization of cyclopropylureas**

An oven dried reaction tube, fitted with a magnetic stirrer, was charged with benzoic acid (15 mol%), the specified Rh pre-catalyst (3.5-10 mol%), PPh<sub>3</sub> (7.0-20 mol%) and urea substrate (100 mol%). The tube was fitted with a rubber septum and purged with argon. Argon sparged anhydrous 1,2-dichlorobenzene (0.2 M) was added *via* syringe before aging the catalyst for *ca.* 5 minutes. The reaction tube was purged with CO and the reaction mixture was sparged for 10 seconds. The reaction was heated at the specified temperature (90-100 °C) under a CO atmosphere until complete consumption of the starting material was observed by thin layer chromatography (23-92 h). The mixture was cooled to r.t., concentrated *in vacuo* and purified by flash column chromatography, under the conditions noted, to afford the target heterocycle.

### **General procedure C for the deprotection/urea formation of Boc-protected cyclopropylamines**

To a solution of Boc-protected cyclopropylamine (100 mol%) in CH<sub>2</sub>Cl<sub>2</sub> (1 M) was added trifluoroacetic acid (1000 mol%) and the reaction was stirred at r.t. for 30 minutes. The reaction mixture was concentrated *in vacuo*. The resulting trifluoroacetate salt and NEt<sub>3</sub> (250 mol%) were dissolved in CH<sub>2</sub>Cl<sub>2</sub> (0.3 M) before adding benzyl isocyanate (95 mol%). The reaction was stirred at r.t. for the specified time before being diluted with CH<sub>2</sub>Cl<sub>2</sub> (5 mL/mmol). The solution was washed with water (5 mL/mmol), aq. 1 M HCl (5 mL/mmol), sat. aq. NaHCO<sub>3</sub> (5 mL/mmol) and brine (5 mL/mmol), dried over Na<sub>2</sub>SO<sub>4</sub> and concentrated *in vacuo*. Purification by flash column chromatography, under the conditions noted, provided the target compound.

### 1,3-Dibenzyl-1-cyclopropylurea (**5a**)

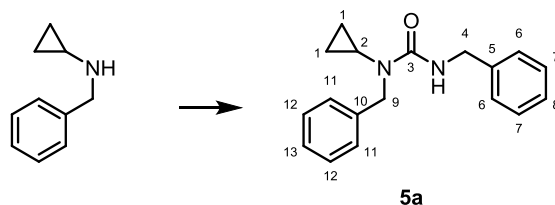

**General procedure A:** *N*-Benzylcyclopropanamine<sup>2</sup> (1.77 g, 11.0 mmol) and benzyl isocyanate (1.24 mL, 10.0 mmol) were employed. The crude mixture was purified by silica gel column chromatography (50% EtOAc/hexane) to yield the title compound **5a** (2.26 g, 81%) as a colorless solid; m.p.: 80-82 °C (CH<sub>2</sub>Cl<sub>2</sub>/hexane);  $\nu_{\max}$  / cm<sup>-1</sup>: 3369 (s), 1635 (s), 1504 (s), 1285 (m), 1230 (m); <sup>1</sup>H NMR (CDCl<sub>3</sub>, 400 MHz):  $\delta$  7.35-7.21 (10H, m, 2  $\times$  C6-H, 2  $\times$  C7-H, C8-H, 2  $\times$  C11-H, 2  $\times$  C12-H and C13-H), 5.61 (1H, t,  $J$  = 5.5 Hz, NH), 4.58 (2H, s, C9-H<sub>2</sub>), 4.50 (2H, d,  $J$  = 5.5 Hz, C4-H<sub>2</sub>), 2.35 (1H, tt,  $J$  = 7.0, 4.0 Hz, C2-H), 0.78-0.74 (4H, m, C1-H<sub>2</sub>); <sup>13</sup>C NMR (CDCl<sub>3</sub>, 100 MHz):  $\delta$  159.1 (C3), 139.8 (C5), 139.1 (C10), 128.7, 128.5, 128.0, 127.5, 127.3, 127.0 (C6, C7, C8, C11, C12 and C13), 50.6 (C9), 44.9 (C4), 27.8 (C2), 8.8 (C1); HRMS: (ESI<sup>+</sup>) Calculated for C<sub>18</sub>H<sub>21</sub>N<sub>2</sub>O: 281.1648. Found [M + H]<sup>+</sup>: 281.1662.

### 1,3-Dibenzyl-3,6-dihydro-1*H*-1,3-diazepine-2,7-dione (**8a**) and 1,3-Dibenzyl-1,3-diazepane-2,4-dione (**9a**)

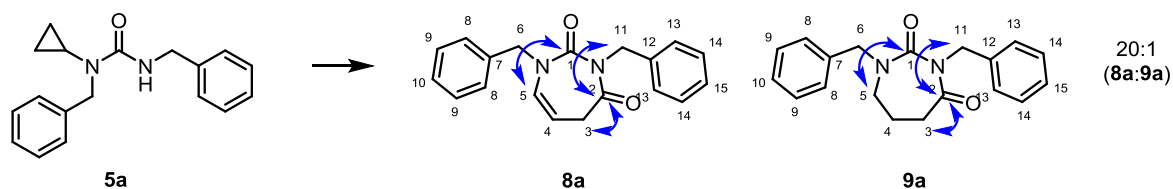

**General Procedure B:** Urea **5a** (53.2 mg, 0.15 mmol) and [Rh(cod)<sub>2</sub>]BARF (3.5 mol%) were employed and the reaction was stirred for 24 h at 100 °C. The crude mixture was purified by silica gel column chromatography (25% EtOAc/hexane) to yield the title compound **8a** (37.5 mg, 82%) as a yellow oil. Analysis of the crude reaction mixture by <sup>1</sup>H NMR revealed a 20:1 (**8a**:**9a**) mixture of products. An analytical sample of **9a** was also isolated for characterisation.

Data for major compound **8a**;  $\nu_{\max}$  / cm<sup>-1</sup>: 1699 (s), 1647 (s), 1406 (s), 1395 (s), 1212 (s); <sup>1</sup>H NMR (CDCl<sub>3</sub>, 400 MHz):  $\delta$  7.30-7.21 (8H, m, 2  $\times$  C9-H, C10-H, 2  $\times$  C13-H, 2  $\times$  C14-H, C15-H), 7.05-7.03 (2H, m, 2  $\times$  C8-H), 6.03 (1H, d,  $J$  = 7.0 Hz, C5-H), 5.54 (1H, dt,  $J$  = 7.0, 7.0 Hz, C4-H), 5.05 (2H, s, C11-H<sub>2</sub>), 4.73 (2H, s, C6-H<sub>2</sub>), 3.08 (2H, d,  $J$  = 7.0 Hz, C3-H<sub>2</sub>); <sup>13</sup>C NMR (CDCl<sub>3</sub>, 100 MHz):  $\delta$  170.0 (C2), 153.9 (C1), 137.6 (C12), 136.1 (C7), 130.3 (C5), 128.7.



128.4, 128.1, 127.8, 127.6, 127.3 (C8, C9, C10, C13, C14, C15), 112.7 (C4), 53.0 (C6), 47.9 (C11), 35.0 (C3); HRMS: (ESI<sup>+</sup>) Calculated for C<sub>19</sub>H<sub>18</sub>N<sub>2</sub>NaO<sub>2</sub>: 329.1260. Found [M + Na]<sup>+</sup>: 329.1249. *The structure of this compound was confirmed by 2D NMR. Key HMBC correlations are included on the compound structure above.*

Data for minor compound **9a**;  $\nu_{\max}$  / cm<sup>-1</sup>: 1694 (s), 1656 (s), 1421 (s), 1214 (s), 1158 (s); <sup>1</sup>H NMR (CDCl<sub>3</sub>, 400 MHz):  $\delta$  7.38-7.23 (8H, m, 2 × C9-H, C10-H, 2 × C13-H, 2 × C14-H, C15-H), 7.09-7.06 (2H, m, 2 × C8-H), 4.94 (2H, s, C11-H<sub>2</sub>), 4.60 (2H, s, C6-H<sub>2</sub>), 3.18 (2H, t, *J* = 7.0 Hz, C5-H<sub>2</sub>), 2.54 (2H, t, *J* = 7.0 Hz, C3-H<sub>2</sub>), 1.86 (2H, tt, *J* = 7.0, 7.0 Hz, C4-H<sub>2</sub>); <sup>13</sup>C NMR (CDCl<sub>3</sub>, 100 MHz):  $\delta$  171.3 (C2), 157.6 (C1), 137.8 (C12), 136.7 (C7), 128.8, 128.7, 128.5, 127.8, 127.5 (C8, C9, C10, C13, C14, C15), 51.8 (C6), 46.8 (C11), 45.6 (C5), 33.7 (C3), 25.7 (C4); HRMS: (ESI<sup>+</sup>) Calculated for C<sub>19</sub>H<sub>20</sub>N<sub>2</sub>NaO<sub>2</sub>: 331.1417. Found [M + Na]<sup>+</sup>: 331.1416. *The structure of this compound was confirmed by 2D NMR. Key HMBC correlations are included on the compound structure above.*

### 1-Benzyl-3-butyl-1-cyclopropylurea (**5b**)

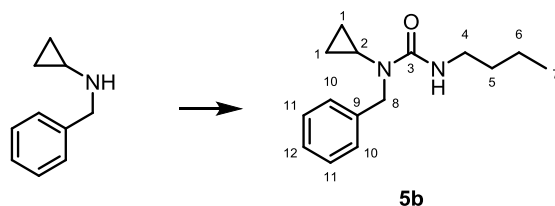

**General procedure A:** *N*-Benzylcyclopropanamine<sup>2</sup> (1.77 g, 11.0 mmol) and butyl isocyanate (1.12 mL, 10.0 mmol) were employed. This crude mixture was purified by silica gel column chromatography (30% EtOAc/hexane) to yield the title compound **5b** (2.43 g, 99%) as a colorless oil;  $\nu_{\max}$  / cm<sup>-1</sup>: 3377 (m), 1638 (s), 1513 (s), 1283 (s), 1269 (s); <sup>1</sup>H NMR (CDCl<sub>3</sub>, 400 MHz):  $\delta$  7.27-7.16 (5H, m, 2 × C10-H, 2 × C11-H, C12-H), 5.31 (1H, t, *J* = 5.5 Hz, NH), 4.51 (2H, s, C8-H<sub>2</sub>), 3.26 (2H, td, *J* = 7.0, 5.5 Hz, C4-H<sub>2</sub>), 2.28 (1H, tt, *J* = 6.5, 4.0 Hz, C2-H), 1.53-1.46 (2H, m, C5-H<sub>2</sub>), 1.38-1.29 (2H, m, C6-H<sub>2</sub>), 0.91 (3H, t, *J* = 7.5 Hz, C7-H<sub>3</sub>), 0.76-0.67 (4H, m, 4 × C1-H); <sup>13</sup>C NMR (CDCl<sub>3</sub>, 100 MHz):  $\delta$  159.0 (C3), 139.2 (C9), 128.3, 128.8, 126.8 (C10, C11, C12), 50.3 (C8), 40.4 (C4), 32.5 (C5), 27.7 (C2), 20.1 (C6), 13.8 (C7), 8.6 (C1); HRMS: (ESI<sup>+</sup>) Calculated for C<sub>15</sub>H<sub>22</sub>N<sub>2</sub>NaO: 269.1624. Found [M + Na]<sup>+</sup>: 269.1629.

### 3-Benzyl-1-butyl-3,6-dihydro-1*H*-1,3-diazepine-2,7-dione (**8b**) and 1-Benzyl-3-butyl-1,3-diazepane-2,4-dione (**9b**)

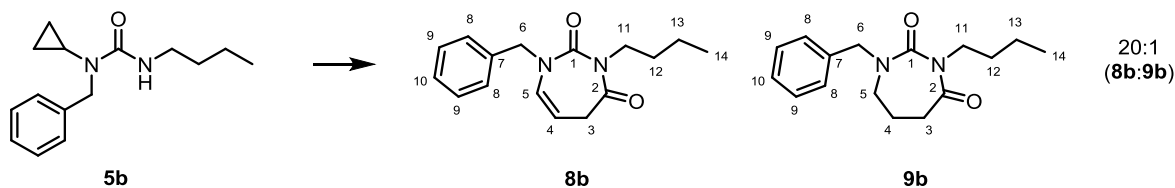

**General Procedure B:** Urea **5b** (37.0 mg, 0.15 mmol) and [Rh(cod)<sub>2</sub>]BARF (5.0 mol%) were employed and the reaction was stirred for 24 h at 100 °C. The crude mixture was purified by silica gel column chromatography (20% EtOAc/hexane) to yield the title compound **8b** (35.2 mg, 85%) as a yellow oil. Analysis of the crude reaction mixture by <sup>1</sup>H NMR revealed a 20:1 (**8b**:**9b**) mixture of products. The minor product **9b** was not isolated.

Data for major compound **8b**:  $\nu_{\max}$  / cm<sup>-1</sup>: 2958 (m), 1698 (s), 1645 (s), 1407 (s), 1214 (s); <sup>1</sup>H NMR (CDCl<sub>3</sub>, 400 MHz):  $\delta$  7.36-7.26 (5H, m, 2 × C8-H, 2 × C9-H, C10-H), 6.10 (1H, d,  $J$  = 7.0 Hz, C5-H), 5.52 (1H, dt,  $J$  = 7.0, 7.0 Hz, C4-H), 4.79 (2H, s, C6-H<sub>2</sub>), 3.80 (2H, t,  $J$  = 7.0 Hz, C11-H<sub>2</sub>), 2.99 (2H, d,  $J$  = 7.0 Hz, C3-H<sub>2</sub>), 1.55 (2H, tt,  $J$  = 7.0, 7.0 Hz, C12-H<sub>2</sub>), 1.27 (2H, tq,  $J$  = 7.0, 7.0 Hz, C13-H<sub>2</sub>), 0.90 (3H, t,  $J$  = 7.0 Hz, C14-H<sub>3</sub>); <sup>13</sup>C NMR (CDCl<sub>3</sub>, 100 MHz):  $\delta$  170.1 (C2), 154.4 (C1), 136.6 (C7), 130.5 (C5), 128.8, 127.9, 127.8 (C8, C9, C10), 113.0 (C4), 53.2 (C6), 45.4 (C11), 35.2 (C3), 30.4 (C12), 20.1 (C13), 13.8 (C14); HRMS: (ESI<sup>+</sup>) Calculated for C<sub>16</sub>H<sub>20</sub>N<sub>2</sub>NaO<sub>2</sub>: 295.1417. Found [M + Na]<sup>+</sup>: 295.1421.

Data for minor compound **9b**: *Characteristic signals only*: <sup>1</sup>H NMR (CDCl<sub>3</sub>, 400 MHz):  $\delta$  4.66 (2H, s, C6-H<sub>2</sub>), 3.75 (2H, t,  $J$  = 7.0 Hz, C11-H<sub>2</sub>), 3.36 (2H, t,  $J$  = 7.0 Hz, C5-H<sub>2</sub>), 2.50 (2H, t,  $J$  = 7.0 Hz, C3-H<sub>2</sub>); HRMS: (ESI<sup>+</sup>) Calculated for C<sub>16</sub>H<sub>22</sub>N<sub>2</sub>NaO<sub>2</sub>: 297.1573. Found [M + Na]<sup>+</sup>: 297.1575.

### 1-Benzyl-1-cyclopropyl-3-phenylurea (**5c**)

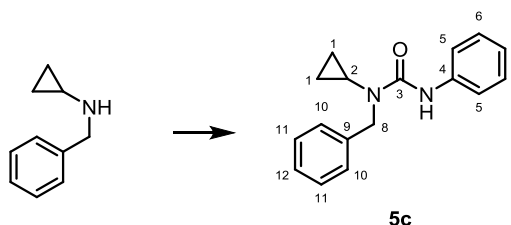

**General procedure A:** *N*-Benzylcyclopropanamine<sup>2</sup> (1.77 g, 11.0 mmol) and phenyl isocyanate (1.09 mL, 10.0 mmol) were employed. The crude mixture was purified by column chromatography (30% EtOAc/hexane) to yield the title compound **5c** (2.54 g, 95%) as a colorless oil;  $\nu_{\max}$  / cm<sup>-1</sup>: 3431 (m), 3355 (m), 1659 (s), 1595 (s), 1522 (s), 1499 (s), 1440 (s),

1237 (s);  $^1\text{H}$  NMR ( $\text{CDCl}_3$ , 400 MHz):  $\delta$  7.49 (2H, d,  $J = 7.5$  Hz,  $2 \times \text{C5-H}$ ), 7.37-7.24 (8H, m,  $\text{NH}$ ,  $2 \times \text{C6-H}$ ,  $2 \times \text{C10-H}$ ,  $2 \times \text{C11-H}$ ,  $\text{C12-H}$ ), 7.05 (1H, t,  $J = 7.5$  Hz,  $\text{C7-H}$ ), 4.64 (2H, s,  $\text{C8-H}_2$ ), 2.53 (1H, tt,  $J = 7.0, 4.0$  Hz,  $\text{C2-H}$ ), 0.97-0.88 (4H, m,  $4 \times \text{C1-H}$ );  $^{13}\text{C}$  NMR ( $\text{CDCl}_3$ , 100 MHz):  $\delta$  156.1 (C3), 139.0 (C9), 138.6 (C10), 128.9 (C6), 128.5, 127.9, 127.1 (C10, C11, C12), 123.0 (C7), 119.5 (C5), 50.4 (C8), 28.1 (C2), 9.0 (C1); HRMS: ( $\text{ESI}^+$ ) Calculated for  $\text{C}_{17}\text{H}_{18}\text{N}_2\text{NaO}$ : 289.1311. Found  $[\text{M} + \text{Na}]^+$ : 289.1306.

### 3-Benzyl-1-phenyl-3,6-dihydro-1*H*-1,3-diazepine-2,7-dione (**8c**) and 1-Benzyl-3-phenyl-1,3-diazepane-2,4-dione (**9c**)

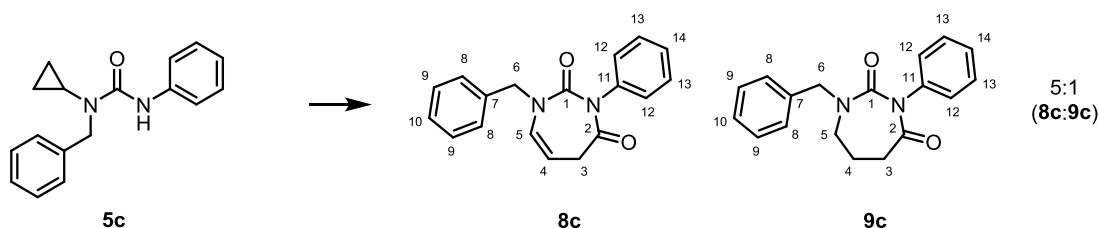

**General Procedure B:** Urea **5c** (40.0 mg, 0.15 mmol) and  $[\text{Rh}(\text{cod})_2]\text{BARF}$  (7.5 mol%) were employed and the reaction was stirred for 70 h at 100 °C. The crude mixture was purified by column chromatography (15-25% EtOAc/hexane) to yield the title compound **8c** (12.2 mg, 28%) as a yellow oil. Analysis of the crude reaction mixture by  $^1\text{H}$  NMR revealed a 5:1 (**8c**:**9c**) mixture of products. The minor product **9c** was not isolated.

Data for major compound **8c**:  $\nu_{\text{max}} / \text{cm}^{-1}$ : 2987 (s), 1705 (s), 1652 (s), 1403 (s), 1392 (s), 1226 (s);  $^1\text{H}$  NMR ( $\text{CDCl}_3$ , 400 MHz):  $\delta$  7.45-7.19 (10H, m,  $2 \times \text{C8-H}$ ,  $2 \times \text{C9-H}$ ,  $\text{C10-H}$ ,  $2 \times \text{C12-H}$ ,  $2 \times \text{C13-H}$ ,  $\text{C14-H}$ ), 6.26 (1H, d,  $J = 7.0$  Hz,  $\text{C5-H}$ ), 5.66 (1H, dt,  $J = 7.0, 7.0$  Hz,  $\text{C4-H}$ ), 4.81 (2H, s,  $\text{C6-H}_2$ ), 3.17 (2H, d,  $J = 7.0$  Hz,  $\text{C3-H}_2$ );  $^{13}\text{C}$  NMR ( $\text{CDCl}_3$ , 100 MHz):  $\delta$  170.5 (C2), 153.7 (C1), 138.8 (C11), 136.4 (C7), 130.8 (C5), 129.1, 128.8, 128.5, 128.3, 128.1, 128.0 (C8, C9, C10, C12, C13, C14), 113.3 (C4), 53.5 (C6), 35.2 (C3); HRMS: ( $\text{ESI}^+$ ) Calculated for  $\text{C}_{18}\text{H}_{16}\text{N}_2\text{NaO}_2$ : 315.1104. Found  $[\text{M} + \text{Na}]^+$ : 315.1092.

Data for minor compound **9c**: *Characteristic signals only*:  $^1\text{H}$  NMR ( $\text{CDCl}_3$ , 400 MHz):  $\delta$  3.26 (2H, t,  $J = 7.0$  Hz,  $\text{C5-H}_2$ ).

### 1-Benzyl-3-cyclohexyl-1-cyclopropylurea (**5d**)

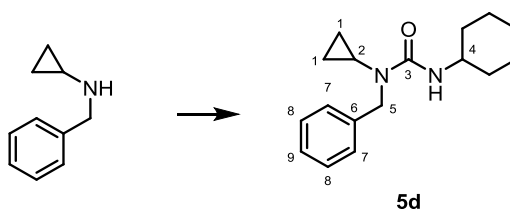

**General procedure A:** *N*-Benzylcyclopropanamine<sup>2</sup> (1.77 g, 11.0 mmol) and cyclohexyl isocyanate (1.28 mL, 10.0 mmol) were employed. The crude mixture was purified by column chromatography (30% EtOAc/hexane) to yield the title compound **5d** (2.15 g, 79%) as a colorless solid: m.p. 60-63 °C (CHCl<sub>3</sub>);  $\nu_{\text{max}}$  / cm<sup>-1</sup>: 3366 (m), 1643 (s), 1506 (s), 1452 (s), 1256 (s); <sup>1</sup>H NMR (CDCl<sub>3</sub>, 400 MHz):  $\delta$  7.23-7.13 (5H, m, 2  $\times$  C7-H, 2  $\times$  C8-H, C9-H), 5.18 (1H, d,  $J$  = 8.0 Hz, NH), 4.48 (2H, s, C5-H<sub>2</sub>), 3.67 (1H, m, C4-H), 2.25 (1H, tt,  $J$  = 6.5, 4.0 Hz, C2-H), 1.94-1.90 (2H, m, 2  $\times$  cyclohexyl CH), 1.68-1.62 (2H, m, 2  $\times$  cyclohexyl CH), 1.55 (1H, m, 1  $\times$  cyclohexyl CH), 1.39-1.28 (2H, m, 2  $\times$  cyclohexyl CH), 1.19-1.08 (3H, m, 3  $\times$  cyclohexyl CH), 0.73-0.64 (4H, m, 4  $\times$  C1-H); <sup>13</sup>C NMR (CDCl<sub>3</sub>, 100 MHz):  $\delta$  158.2 (C3), 139.2 (C6), 128.3, 127.8, 126.8 (C7, C8, C9), 50.3 (C5), 49.1 (C4), 33.8 (cyclohexyl CH<sub>2</sub>), 27.6 (C2), 25.7 (cyclohexyl CH<sub>2</sub>), 24.9 (cyclohexyl CH<sub>2</sub>), 8.6 (C1); HRMS: (ESI<sup>+</sup>) Calculated for C<sub>17</sub>H<sub>24</sub>N<sub>2</sub>NaO: 295.1781. Found [M + Na]<sup>+</sup>: 295.1779.

**3-Benzyl-1-cyclohexyl-3,6-dihydro-1*H*-1,3-diazepine-2,7-dione (8d) and 1-Benzyl-3-cyclohexyl-1,3-diazepane-2,4-dione (9d)**

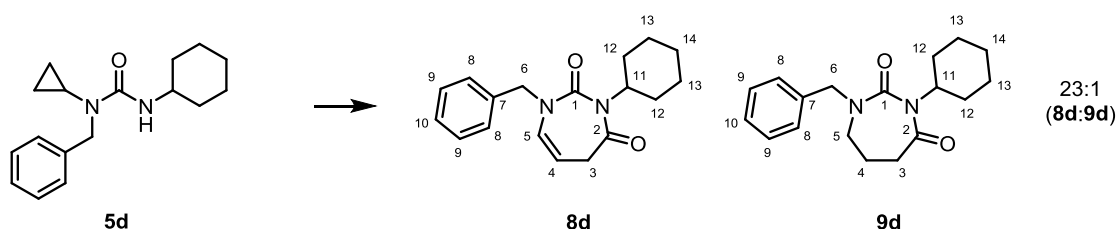

**General Procedure B:** Urea **5d** (40.9 mg, 0.15 mmol) and [Rh(cod)<sub>2</sub>]BARF (7.5 mol%) were employed and the reaction was stirred for 24 h at 100 °C. The crude mixture was purified by column chromatography (20% EtOAc/hexane) to yield the title compound **8d** (31.0 mg, 69%) as a yellow oil. Analysis of the crude reaction mixture by <sup>1</sup>H NMR revealed a 23:1 (**8d**:**9d**) mixture of products. The minor product **9d** was not isolated.

Data for major compound **8d**:  $\nu_{\text{max}}$  / cm<sup>-1</sup>: 2928 (s), 1695 (s), 1648 (s), 1406 (s), 1394 (s), 1223 (s), 1049 (s); <sup>1</sup>H NMR (CDCl<sub>3</sub>, 400 MHz):  $\delta$  7.36-7.24 (5H, m, 2  $\times$  C8-H, 2  $\times$  C9-H, C10-H), 6.09 (1H, d,  $J$  = 7.0 Hz, C5-H), 5.55 (1H, dt,  $J$  = 7.0, 7.0 Hz, C4-H), 4.77 (2H, s, C6-H<sub>2</sub>), 4.14

(1H, tt,  $J = 12.0, 3.5$  Hz, C11-H), 2.93 (2H, d,  $J = 7.0$  Hz, C3-H<sub>2</sub>), 2.08-1.98 (2H, m, 2 × C12-H), 1.81 1.63 (5H, m, 2 × C12-H, 2 × C13-H, 1 × C14-H), 1.38-1.11 (3H, m, 2 × C13-H, 1 × C14-H); <sup>13</sup>C NMR (CDCl<sub>3</sub>, 100 MHz): δ 17.5 (C2), 153.9 (C1), 136.5 (C7), 130.3 (C5), 128.8, 127.9, 127.8 (C8, C9, C10), 114.3 (C4), 57.5 (C11), 52.7 (C6), 35.4 (C3), 29.9 (C12), 26.3 (C13), 25.4 (C14); HRMS: (ESI<sup>+</sup>) Calculated for C<sub>18</sub>H<sub>22</sub>N<sub>2</sub>NaO<sub>2</sub>: 321.1573. Found [M + Na]<sup>+</sup>: 321.1568.

Data for minor compound **9d**: *Characteristic signals only*: <sup>1</sup>H NMR (CDCl<sub>3</sub>, 400 MHz): δ 4.64 (2H, s, C6-H<sub>2</sub>).

### 1-Benzyl-1-cyclopropylurea (**5e**)

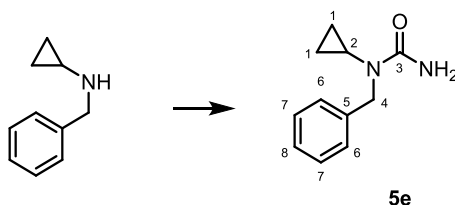

The title compound was prepared following the literature procedure.<sup>3</sup> In a round bottom flask containing a stirrer bar, *N*-benzylcyclopropanamine<sup>2</sup> (1.47 g, 10.0 mmol) was suspended in water (40 mL) and conc. HCl (0.84 mL, 10.0 mmol) was added. Upon stirring, a solution of KOCN (1.22 g, 15.0 mmol) in water (40 mL) was added. The mixture was stirred at r.t. for 36 h, during which time a colorless precipitate was formed. The precipitate was collected by suction filtration and the cake was purified by recrystallization (CH<sub>2</sub>Cl<sub>2</sub>/hexane) to yield the title compound **5e** (712 mg, 37%) as colorless needles; m.p. 96-98 °C (CH<sub>2</sub>Cl<sub>2</sub>/hexane);  $\nu_{\text{max}}$  / cm<sup>-1</sup>: 3484 (m), 3455 (m), 3150 (m), 1646 (s), 1591 (s), 1413 (s), 1028 (s); <sup>1</sup>H NMR (CDCl<sub>3</sub>, 400 MHz): δ 7.33-7.22 (5H, m, 2 × C6-H, 2 × C7-H, C8-H), 5.24 (2H, br. s, NH<sub>2</sub>), 4.55 (2H, s, C4-H<sub>2</sub>), 2.44 (1H, m, C2-H), 0.83-0.75 (4H, m, 4 × C1-H); <sup>13</sup>C NMR (CDCl<sub>3</sub>, 100 MHz): δ 160.1 (C3), 138.7 (C5), 128.4, 127.7, 127.0 (C6, C7, C8), 50.1 (C4), 28.6 (C2), 8.5 (C1); HRMS: (ESI<sup>+</sup>) Calculated for C<sub>11</sub>H<sub>14</sub>N<sub>2</sub>NaO: 213.0998. Found [M + Na]<sup>+</sup>: 213.1006.

### 3-Benzyl-3,6-dihydro-1*H*-1,3-diazepine-2,7-dione (**8e**) and 1-Benzyl-1,3-diazepane-2,4-dione (**9e**)

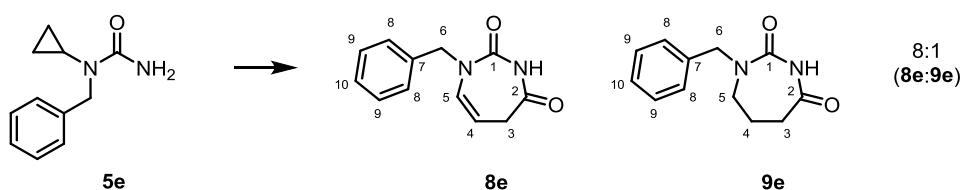

**General Procedure B:** Urea **5e** (28.5 mg, 0.15 mmol) and [Rh(cod)<sub>2</sub>]BARF (5.0 mol%) were employed and the reaction was stirred for 72 h at 100 °C. The crude mixture was purified by column chromatography (45% EtOAc/hexane) to yield the title compound **8e** (17.5 mg, 54%) as a beige oil. Analysis of the crude reaction mixture by <sup>1</sup>H NMR revealed an 8:1 (**8e**:**9e**) mixture of products. The minor product **9e** was not isolated.

Data for major compound **8e**:  $\nu_{\text{max}}$  / cm<sup>-1</sup>: 3215 (m), 2987 (s), 1653 (s), 1412 (s), 1388 (s), 1260 (s), 1075 (s); <sup>1</sup>H NMR (CDCl<sub>3</sub>, 400 MHz):  $\delta$  7.50 (1H, br. s, NH), 7.38-7.24 (5H, m, 2 × C8-H, 2 × C9-H, C10-H), 6.09 (1H, d,  $J$  = 7.5 Hz, C5-H), 5.42 (1H, dt,  $J$  = 7.5, 7.0 Hz, C4-H), 4.78 (2H, s, C6-H<sub>2</sub>), 3.06 (2H, d,  $J$  = 7.0 Hz, C3-H<sub>2</sub>); <sup>13</sup>C NMR (CDCl<sub>3</sub>, 100 MHz):  $\delta$  171.1 (C2), 151.2 (C1), 136.2 (C7), 130.8 (C5), 128.9, 128.0, 127.9 (C8, C9, C10), 110.4 (C4), 52.6 (C6), 34.3 (C3); HRMS: (ESI<sup>+</sup>) Calculated for C<sub>12</sub>H<sub>12</sub>N<sub>2</sub>NaO<sub>2</sub>: 239.0790. Found [M + Na]<sup>+</sup>: 239.0787.

Data for minor compound **9e**: *Characteristic signals only*: <sup>1</sup>H NMR (CDCl<sub>3</sub>, 400 MHz):  $\delta$  3.41 (2H, t,  $J$  = 7.0 Hz, C5-H<sub>2</sub>).

### ***N*-Butylcyclopropanamine**

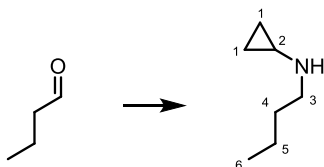

A solution of cyclopropylamine (8.31 mL, 120 mmol), butyraldehyde (9.01 mL, 100 mmol) and NaHCO<sub>3</sub> (12.6 g, 150 mmol) in MeOH (100 mL) was heated at reflux for 24 h. The reaction mixture was cooled to 0 °C and NaBH<sub>4</sub> (4.73 g, 125 mmol) was added portionwise over 5 minutes. The solution was warmed r.t. and stirred for 18 h. The reaction mixture was concentrated *in vacuo* and then sat. aq. NaHCO<sub>3</sub> (100 mL) was added. The solution was extracted with CH<sub>2</sub>Cl<sub>2</sub> (3 × 75 mL) and then the organic extracts were combined, washed with brine (75 mL), dried over Na<sub>2</sub>SO<sub>4</sub> and concentrated *in vacuo* to yield *N*-butylcyclopropylamine (7.20 g, 63%) as a yellow oil, *N.B. Due to volatility issues a cold water bath was used when concentrating in vacuo*;  $\nu_{\text{max}}$  / cm<sup>-1</sup>: 3087 (w), 2957 (s), 2930 (s), 1457 (s), 1214 (s); <sup>1</sup>H NMR (CDCl<sub>3</sub>, 400 MHz):  $\delta$  2.63 (2H, t,  $J$  = 7.0 Hz, C3-H<sub>2</sub>), 2.06 (1H, tt,  $J$  = 7.0, 4.0 Hz, C2-H), 1.55 (1H, br. s, NH), 1.45-1.38 (2H, m, C4-H<sub>2</sub>), 1.34-1.24 (2H, m, C5-H<sub>2</sub>), 0.87 (3H, t,  $J$  = 7.5 Hz, C6-H<sub>3</sub>), 0.39-0.35 (2H, m, 2 × C1-H), 0.29-0.25 (2H, m, 2 × C1-H); <sup>13</sup>C NMR (CDCl<sub>3</sub>, 100

MHz):  $\delta$  49.4 (C3), 32.3 (C4), 30.4 (C2), 20.6 (C5), 14.0 (C6), 6.3 (C1); HRMS: (ESI<sup>+</sup>) Calculated for C<sub>7</sub>H<sub>16</sub>N: 114.1277. Found [M + H]<sup>+</sup>: 114.1280.

### 3-Benzyl-1-butyl-1-cyclopropylurea (5f)

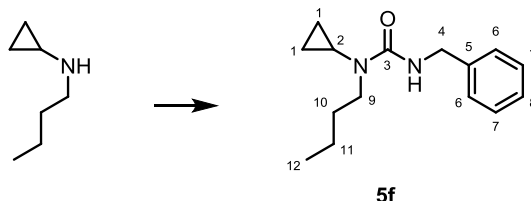

**General procedure A:** *N*-Butylcyclopropanamine (1.25 g, 11.0 mmol) and benzyl isocyanate (1.24 mL, 10.0 mmol) were employed. This crude mixture was purified by column chromatography (40% EtOAc/hexane) to yield the title compound **5f** (1.33 g, 54%) as a colorless solid; m.p. 39–40 °C (CH<sub>2</sub>Cl<sub>2</sub>/hexane);  $\nu_{\text{max}}$  / cm<sup>-1</sup>: 3327 (m), 1635 (s), 1517 (s), 1372 (m), 1292 (s), 1026 (m); <sup>1</sup>H NMR (CDCl<sub>3</sub>, 400 MHz):  $\delta$  7.37–7.24 (5H, m, 2 × C6-H, 2 × C7-H, C8-H), 5.52 (1H, t, *J* = 6.0 Hz, NH), 4.47 (2H, d, *J* = 6.0 Hz, C4-H<sub>2</sub>), 3.35 (2H, t, *J* = 7.0 Hz, C9-H<sub>2</sub>), 2.46 (1H, tt, *J* = 6.5, 4.0 Hz, C2-H), 1.60–1.52 (2H, m, C10-H<sub>2</sub>), 1.37–1.28 (2H, m, C11-H<sub>2</sub>), 0.94 (3H, t, *J* = 7.5 Hz, C12-H<sub>3</sub>), 0.83–0.79 (2H, m, 2 × C1-H), 0.73–0.69 (2H, m, 2 × C1-H); <sup>13</sup>C NMR (CDCl<sub>3</sub>, 100 MHz):  $\delta$  158.8 (C3), 139.9 (C5), 128.6, 127.4, 127.1 (C6, C7, C8), 46.6 (C9), 44.6 (C4), 30.5 (C10), 27.5 (C2), 20.2 (C11), 14.0 (C12), 8.6 (C1); HRMS: (ESI<sup>+</sup>) Calculated for C<sub>15</sub>H<sub>22</sub>N<sub>2</sub>NaO: 269.1624. Found [M + Na]<sup>+</sup>: 269.1620.

### 1-Benzyl-3-butyl-3,6-dihydro-1*H*-1,3-diazepine-2,7-dione (**8f**) and 3-Benzyl-1-butyl-1,3-diazepane-2,4-dione (**9f**)

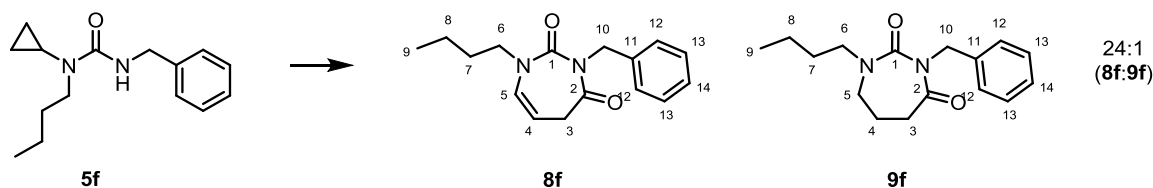

**General Procedure B:** Urea **5f** (37.0 mg, 0.150 mmol) and [Rh(cod)<sub>2</sub>]BARF (3.5 mol%) were employed and the reaction was stirred for 25 h at 100 °C. The crude mixture was purified by column chromatography (30% EtOAc/hexane) to yield the title compound **8f** (33.3 mg, 82%) as a yellow oil. Analysis of the crude reaction mixture by <sup>1</sup>H NMR revealed a 24:1 (**8f**:**9f**) mixture of products. The minor product **9f** was not isolated.

Data for major compound **8f**:  $\nu_{\max}$  /  $\text{cm}^{-1}$ : 2958 (m), 1699 (s), 1647 (s), 1408 (s), 1212 (s);  $^1\text{H}$  NMR ( $\text{CDCl}_3$ , 400 MHz):  $\delta$  7.29-7.20 (5H, m,  $2 \times \text{C12-H}$ ,  $2 \times \text{C13-H}$ ,  $\text{C14-H}$ ), 6.04 (1H, d,  $J = 7.0$  Hz,  $\text{C5-H}$ ), 5.56 (1H, dt,  $J = 7.0, 7.0$  Hz,  $\text{C4-H}$ ), 5.00 (2H, s,  $\text{C10-H}_2$ ), 3.55 (2H, t,  $J = 7.0$  Hz,  $\text{C6-H}_2$ ), 3.09 (2H, d,  $J = 7.0$  Hz,  $\text{C3-H}_2$ ), 1.56-1.48 (2H, m,  $\text{C7-H}_2$ ), 1.31-1.22 (2H, m,  $\text{C8-H}_2$ ), 0.90 (3H, t,  $J = 7.0$  Hz,  $\text{C9-H}_3$ );  $^{13}\text{C}$  NMR ( $\text{CDCl}_3$ , 100 MHz):  $\delta$  170.1 ( $\text{C2}$ ), 153.6 ( $\text{C1}$ ), 137.7 ( $\text{C11}$ ), 130.7 ( $\text{C5}$ ), 128.3, 127.8, 127.1 ( $\text{C12}$ ,  $\text{C13}$ ,  $\text{C14}$ ), 112.4 ( $\text{C4}$ ), 49.9 ( $\text{C6}$ ), 48.0 ( $\text{C10}$ ), 34.9 ( $\text{C3}$ ), 30.2 ( $\text{C7}$ ), 19.9 ( $\text{C8}$ ), 13.7 ( $\text{C9}$ ); HRMS: ( $\text{ESI}^+$ ) Calculated for  $\text{C}_{16}\text{H}_{20}\text{N}_2\text{NaO}_2$ : 295.1417. Found  $[\text{M} + \text{Na}]^+$ : 295.1419.

Data for minor compound **9f**: *Characteristic signals only*:  $^1\text{H}$  NMR ( $\text{CDCl}_3$ , 400 MHz):  $\delta$  2.60 (2H, t,  $J = 7.0$  Hz,  $\text{C3-H}_2$ ).

### 3-Benzyl-1-cyclopropyl-1-(naphthalen-1-yl)urea (**5g**)

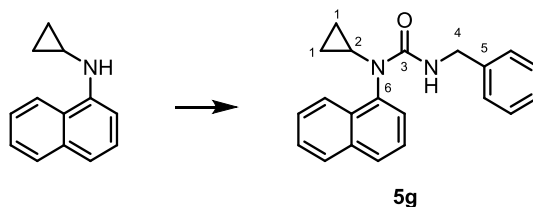

**General procedure A:** *N*-Cyclopropyl-1-naphthylamine<sup>4</sup> (1.83 g, 10.0 mmol) and benzyl isocyanate (1.09 mL, 10.0 mmol) were employed. The crude mixture was purified by column chromatography (10-30% EtOAc/hexane) to yield the title compound **5g** (1.15 g, 36%) as a yellow solid; m.p. 109-111 °C ( $\text{CH}_2\text{Cl}_2$ /hexane);  $\nu_{\max}$  /  $\text{cm}^{-1}$ : 3357 (m), 1650 (s), 1504 (s), 1311 (s), 1220 (m);  $^1\text{H}$  NMR ( $\text{CDCl}_3$ , 400 MHz):  $\delta$  7.88-7.81 (3H, m,  $3 \times \text{ArCH}$ ), 7.54-7.45 (3H, m,  $3 \times \text{ArCH}$ ), 7.30-7.14 (6H, m,  $6 \times \text{ArCH}$ ), 4.79 (1H, br. s,  $\text{NH}$ ), 4.38 (2H, d,  $J = 6.0$  Hz,  $\text{C4-H}_2$ ), 3.26 (1H, tt,  $J = 7.0, 4.0$  Hz,  $\text{C2-H}$ ), 0.77-0.69 (2H, m,  $2 \times \text{C1-H}$ ), 0.62-0.47 (2H, m,  $2 \times \text{C1-H}$ );  $^{13}\text{C}$  NMR ( $\text{CDCl}_3$ , 100 MHz):  $\delta$  158.5 ( $\text{C3}$ ), 139.6 ( $\text{C5}$ ), 138.0 ( $\text{C6}$ ), 134.8 ( $\text{ArC}$ ), 131.6 ( $\text{ArC}$ ), 128.5, 128.4, 127.4, 127.2, 127.1, 126.7, 126.6, 125.9, 123.1 ( $10 \times \text{ArCH}$ ), 44.6 ( $\text{C4}$ ), 31.2 ( $\text{C2}$ ), 7.6 ( $\text{C1}$ ); HRMS: ( $\text{ESI}^+$ ) Calculated for  $\text{C}_{21}\text{H}_{20}\text{N}_2\text{NaO}$ : 339.1468. Found  $[\text{M} + \text{Na}]^+$ : 339.1479.

### 1-Benzyl-3-(naphthalen-1-yl)-3,6-dihydro-1*H*-1,3-diazepine-2,7-dione (**8g**) and 3-Benzyl-1-(naphthalen-1-yl)-1,3-diazepane-2,4-dione (**9g**)



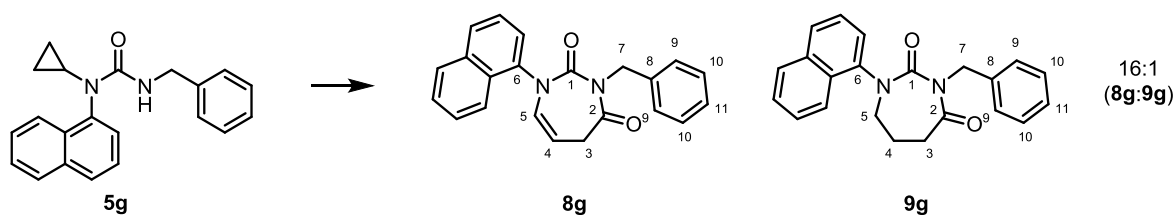

**General Procedure B:** Urea **5g** (47.5 mg, 0.150 mmol) and [Rh(cod)<sub>2</sub>]BARF (5.0 mol%) were employed and the reaction was stirred for 72 h at 100 °C. The crude mixture was purified by column chromatography (30% EtOAc/hexane) to yield the title compound **8g** (31.0 mg, 60%) as a yellow oil. Analysis of the crude reaction mixture by <sup>1</sup>H NMR revealed a 16:1 (**8g**:**9g**) mixture of products. The minor product **9g** was not isolated.

Data for major compound **8g**:  $\nu_{\text{max}}$  / cm<sup>-1</sup>: 2960 (s), 1701 (s), 1652 (s), 1394 (s), 1201 (s), 1141 (m); <sup>1</sup>H NMR (CDCl<sub>3</sub>, 400 MHz):  $\delta$  7.88-7.86 (2H, m, 2  $\times$  ArCH), 7.49-7.45 (2H, m, 2  $\times$  ArCH), 7.40-7.35 (5H, m, 2  $\times$  C9-H, 2  $\times$  C10-H, C11-H), 7.28-7.24 (2H, m, 2  $\times$  ArCH), 6.93 (1H, d,  $J$  = 8.5 Hz, 1  $\times$  ArCH), 6.11 (1H, dd,  $J$  = 7.0, 1.0 Hz, C5-H), 5.65 (1H, dt,  $J$  = 7.0, 7.0 Hz, C4-H), 5.36 (1H, d,  $J$  = 14.5 Hz, 1  $\times$  C7-H), 4.90 (1H, d,  $J$  = 14.5 Hz, 1  $\times$  C7-H), 3.50-3.40 (2H, m, C3-H<sub>2</sub>); <sup>13</sup>C NMR (CDCl<sub>3</sub>, 100 MHz):  $\delta$  169.9 (C2), 153.6 (C1), 137.4 (C8), 137.3 (C6), 134.6 (ArC), 131.6 (C5), 129.4 128.8, 128.7, 128.5, 128.5, 127.5 (C9, C10, C11, 3  $\times$  ArC), 127.3, 126.5, 126.0, 125.5, 121.8 (5  $\times$  ArCH), 111.1 (C4), 48.0 (C7), 35.0 (C3); HRMS: (ESI<sup>+</sup>) Calculated for C<sub>22</sub>H<sub>18</sub>N<sub>2</sub>NaO<sub>2</sub>: 365.1260. Found [M + Na]<sup>+</sup>: 365.1265.

Data for minor compound **9g**: *Characteristic signals only*: <sup>1</sup>H NMR (CDCl<sub>3</sub>, 400 MHz):  $\delta$  3.26 (2H, t,  $J$  = 7.0 Hz, C5-H<sub>2</sub>).

#### ***tert*-Butyl *N*-(benzylcarbamoyl)-*N*-cyclopropylglycinate (**5h**)**

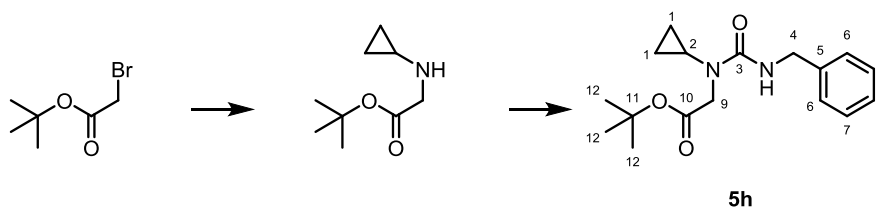

To a solution of cyclopropylamine (1.04 mL, 15.0 mmol) and NEt<sub>3</sub> (2.79 mL, 20.0 mmol), in CH<sub>2</sub>Cl<sub>2</sub> (20 mL), was added *t*-butyl bromoacetate (1.48 mL, 10.0 mmol) at r.t.. The reaction mixture was stirred for 7 h before cooling to 0 °C. Benzyl isocyanate (1.84 mL, 20.0 mmol) was added and the reaction mixture was warmed to r.t. and stirred for a further 17 h. The resulting solution was diluted with CH<sub>2</sub>Cl<sub>2</sub> (25 mL), and washed with water (30 mL), aq. 1 M

HCl (30 mL), sat. aq. NaHCO<sub>3</sub> (30 mL) and brine (30 mL) before being dried over Na<sub>2</sub>SO<sub>4</sub> and concentrated *in vacuo*. The crude product was purified by column chromatography (40-50% EtOAc/hexane) to yield the title compound **5h** (1.50 g, 49%) as a colorless solid; m.p. 70-72 °C (CH<sub>2</sub>Cl<sub>2</sub>/hexane);  $\nu_{\max}$  / cm<sup>-1</sup>: 3359 (s), 2973 (w), 1749 (s), 1639 (s), 1526 (s), 1220 (s), 1151 (s); <sup>1</sup>H NMR (CDCl<sub>3</sub>, 400 MHz):  $\delta$  7.36-7.31 (4H, m, 2 × C6-H, 2 × C7-H), 7.26 (1H, m, C8-H), 5.67 (1H, br. s, NH), 4.49 (2H, d, *J* = 5.5 Hz, C4-H<sub>2</sub>), 3.99 (2H, s, C9-H<sub>2</sub>), 2.71 (1H, m, C2-H), 1.47 (9H, s, C12-H<sub>3</sub>), 0.80 (2H, m, 2 × C1-H), 0.73 (2H, m, 2 × C1-H); <sup>13</sup>C NMR (CDCl<sub>3</sub>, 100 MHz):  $\delta$  170.1 (C10), 158.9 (C3), 139.7 (C5), 128.7 (C6), 127.6 (C7), 127.3 (C8), 81.5 (C11), 50.1 (C9), 44.8 (C4), 28.7 (C2), 28.3 (C12), 8.8 (C1); HRMS: (ESI<sup>+</sup>) Calculated for C<sub>17</sub>H<sub>24</sub>N<sub>2</sub>NaO<sub>3</sub>: 327.1679. Found [M + H]<sup>+</sup>: 327.1684.

**tert-Butyl 2-(3-benzyl-2,4-dioxo-2,3,4,5-tetrahydro-1H-1,3-diazepin-1-yl)acetate (8h) and tert-Butyl 2-(3-benzyl-2,4-dioxo-1,3-diazepan-1-yl)acetate (9h)**

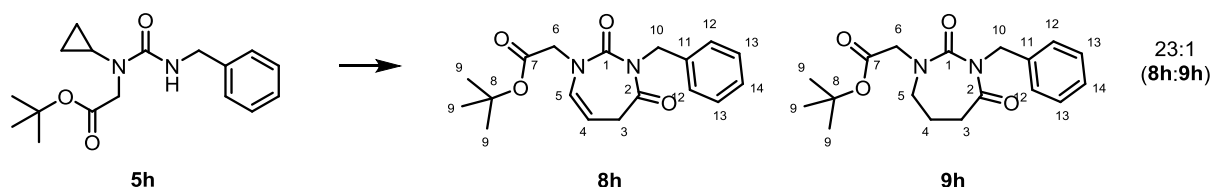

**General Procedure B:** Urea **5h** (45.7 mg, 0.15 mmol) and [Rh(cod)<sub>2</sub>]BARF (5.0 mol%) were employed and the reaction was stirred for 48 h at 100 °C. The crude mixture was purified by column chromatography (20% EtOAc/hexane) to yield the title compound **8h** (32.4 mg, 65%) as a colorless oil. Analysis of the crude reaction mixture by <sup>1</sup>H NMR revealed a 23:1 (**8h**:**9h**) mixture of products. The minor product **9h** was not isolated.

Data for major compound **8h**: m.p. 113-116 °C (CH<sub>2</sub>Cl<sub>2</sub>/hexane);  $\nu_{\max}$  / cm<sup>-1</sup>: 2976 (w), 1747 (s), 1696 (s), 1647 (s), 1438 (s), 1219 (s), 1152 (s); <sup>1</sup>H NMR (CDCl<sub>3</sub>, 400 MHz):  $\delta$  7.30-7.19 (5H, m, 2 × C12-H, 2 × C13-H, C14-H), 6.02 (1H, d, *J* = 7.0 Hz, C5-H), 5.61 (1H, dt, *J* = 7.0, 7.0 Hz, C4-H), 5.00 (2H, s, C10-H<sub>2</sub>), 4.14 (2H, s, C6-H<sub>2</sub>), 3.29 (2H, d, *J* = 7.0 Hz, C3-H<sub>2</sub>), 1.44 (9H, s, C9-H<sub>3</sub>); <sup>13</sup>C NMR (CDCl<sub>3</sub>, 100 MHz):  $\delta$  170.5 (C2), 167.3 (C7), 154.3 (C1), 137.7 (C11), 130.9 (C5), 128.5, 127.9, 127.3 (C12, C13, C14), 113.7 (C4), 82.7 (C8), 52.0 (C6), 48.2 (C10), 35.1 (C3), 28.2 (C9); HRMS: (ESI<sup>+</sup>) Calculated for C<sub>18</sub>H<sub>22</sub>N<sub>2</sub>NaO<sub>4</sub>: 353.1472. Found [M + Na]<sup>+</sup>: 353.1476.

Data for minor compound **9h**: *Characteristic signals only*:  $^1\text{H}$  NMR ( $\text{CDCl}_3$ , 400 MHz):  $\delta$  2.83 (2H, t,  $J = 7.0$  Hz, C5-H<sub>2</sub>).

### 3-Benzyl-1-cyclopropyl-1-(cyclopropylmethyl)urea (**5i**)

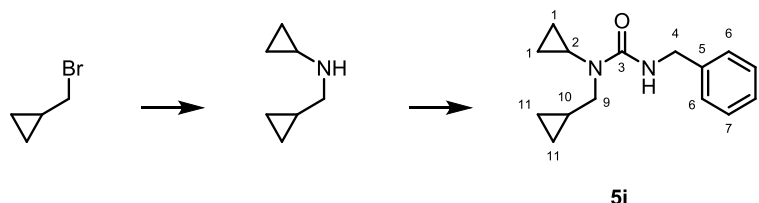

(Bromomethyl)cyclopropane (0.97 mL, 10.0 mmol) was added to a stirred solution of cyclopropylamine (2.08 mL, 30.0 mmol) in DMSO (25 mL) at room temperature. The reaction was stirred for 20 h before being diluted with  $\text{CH}_2\text{Cl}_2$  (200 mL), washed with water ( $2 \times 200$  mL) and brine (200 mL). The organics were dried over  $\text{Na}_2\text{SO}_4$  and carefully concentrated *in vacuo*. The crude amine was dissolved in  $\text{CH}_2\text{Cl}_2$  (33 mL) and cooled to  $0^\circ\text{C}$  before adding benzyl isocyanate (1.12 mL, 9.09 mmol). The reaction mixture was warmed to r.t. and stirred for 16 h. The reaction mixture was concentrated *in vacuo* to yield a crude mixture which was purified by column chromatography (25% EtOAc/hexane) to yield the title compound **5i** (1.10 g, 45%) as a colorless solid. m.p.  $74\text{--}75^\circ\text{C}$  ( $\text{CH}_2\text{Cl}_2$ /hexane);  $\nu_{\text{max}} / \text{cm}^{-1}$ : 3375 (s), 2922 (w), 1640 (s), 1628 (s), 1509 (s), 1274 (s);  $^1\text{H}$  NMR ( $\text{CDCl}_3$ , 400 MHz):  $\delta$  7.30–7.18 (5H, m,  $2 \times$  C6-H,  $2 \times$  C7-H, C8-H), 5.54 (1H, br. s, NH), 4.42 (2H, d,  $J = 6.0$  Hz, C4-H<sub>2</sub>), 3.18 (2H, d,  $J = 7.0$  Hz, C9-H<sub>2</sub>), 2.54 (1H, m, C2-H), 1.00 (1H, m, C10-H), 0.76 (2H, m, C1-H<sub>2</sub>), 0.65 (2H, m, C1-H<sub>2</sub>), 0.41 (2H, m, C11-H<sub>2</sub>), 0.20 (2H, m, C11-H<sub>2</sub>);  $^{13}\text{C}$  NMR ( $\text{CDCl}_3$ , 100 MHz):  $\delta$  159.1 (C3), 140.0 (C5), 128.7 (C7), 127.6 (C6), 127.2 (C8), 51.4 (C9), 44.8 (C4), 27.7 (C2), 10.1 (C10), 9.1 (C1), 3.5 (C11); HRMS: (ESI<sup>+</sup>) Calculated for  $\text{C}_{15}\text{H}_{20}\text{N}_2\text{NaO}$ : 267.1468. Found [ $\text{M} + \text{Na}$ ]<sup>+</sup>: 267.1470.

### 1-Benzyl-3-(cyclopropylmethyl)-3,6-dihydro-1H-1,3-diazepine-2,7-dione (**8i**) and 3-benzyl-1-(cyclopropylmethyl)-1,3-diazepane-2,4-dione (**9i**)

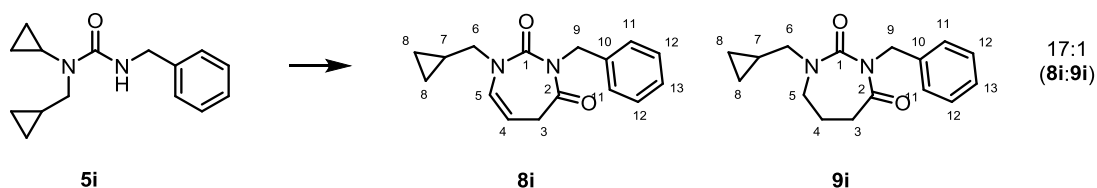

**General Procedure B:** Urea **5i** (36.7 mg, 0.15 mmol) and  $[\text{Rh}(\text{cod})_2]\text{BARF}$  (3.5 mol%) were employed and the reaction was stirred for 24 h at  $100^\circ\text{C}$ . The crude mixture was purified by

column chromatography (20% EtOAc/hexane) to yield the title compound **8i** (35.0 mg, 86%) as a brown oil. Analysis of the crude reaction mixture by  $^1\text{H}$  NMR revealed a 20:1 (**8i**:**9i**) mixture of products. The minor product **9i** was not isolated.

Data for major compound **8i**:  $\nu_{\text{max}}$  /  $\text{cm}^{-1}$ : 3003 (w), 1699 (s), 1648 (s), 1409 (s), 1214 (s);  $^1\text{H}$  NMR ( $\text{CDCl}_3$ , 400 MHz):  $\delta$  7.31-7.19 (5H, m,  $2 \times \text{C11-H}$ ,  $2 \times \text{C12-H}$ ,  $\text{C13-H}$ ), 6.13 (1H, d,  $J = 7.0$  Hz,  $\text{C5-H}$ ), 5.59 (1H, dt,  $J = 7.0, 7.0$  Hz,  $\text{C4-H}$ ), 5.01 (2H, s,  $\text{C9-H}_2$ ), 3.46 (2H, d,  $J = 7.0$  Hz,  $\text{C6-H}_2$ ), 3.14 (2H, d,  $J = 7.0$  Hz,  $\text{C3-H}_2$ ), 1.04 (1H, m,  $\text{C7-H}$ ), 0.49 (2H, m,  $2 \times \text{C8-H}$ ), 0.26 (2H, m,  $\text{C8-H}$ );  $^{13}\text{C}$  NMR ( $\text{CDCl}_3$ , 100 MHz):  $\delta$  170.4 (C2), 153.9 (C1), 137.9 (C10), 130.9 (C5), 128.4, 127.9, 127.2 (C11, C12, C13), 112.7 (C4), 54.5 (C6), 48.1 (C9), 35.1 (C3), 10.2 (C7), 3.6 (C8); HRMS: ( $\text{ESI}^+$ ) Calculated for  $\text{C}_{16}\text{H}_{18}\text{N}_2\text{NaO}_2$ : 293.1260. Found  $[\text{M} + \text{Na}]^+$ : 293.1270.

Data for minor compound **9i**: *Characteristic signals only*:  $^1\text{H}$  NMR ( $\text{CDCl}_3$ , 400 MHz):  $\delta$  2.65 (2H, t,  $J = 7.5$  Hz,  $\text{C3-H}_2$ ).

### 3-Benzyl-1-cyclopropyl-1-(3,4-dimethoxyphenethyl)urea (**5l**)

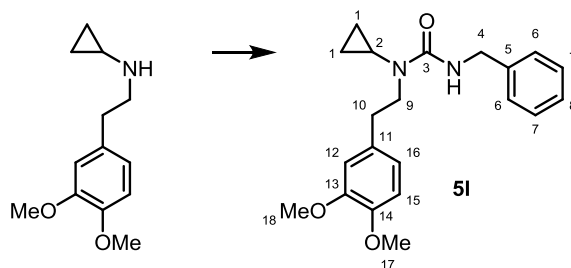

**General procedure A:** *N*-(3,4-Dimethoxyphenethyl)cyclopropanamine<sup>5</sup> (664 mg, 3.00 mmol) and benzyl isocyanate (0.370 mL, 3.00 mmol) were employed. The crude mixture was purified by column chromatography (60-80% EtOAc/hexane) to yield the title compound **5l** (978 mg, 92%) as a yellow oil;  $\nu_{\text{max}}$  /  $\text{cm}^{-1}$ : 3373 (m), 1644 (s), 1510 (s), 1453 (s), 1259 (s), 1235 (s);  $^1\text{H}$  NMR ( $\text{CDCl}_3$ , 400 MHz):  $\delta$  7.34-7.22 (5H, m,  $2 \times \text{C6-H}$ ,  $2 \times \text{C7-H}$ ,  $\text{C8-H}$ ), 6.79-6.75 (3H, m,  $\text{C12-H}$ ,  $\text{C15-H}$ ,  $\text{C16-H}$ ), 5.56 (1H, t,  $J = 5.0$  Hz,  $\text{NH}$ ), 4.45 (2H, d,  $J = 5.0$  Hz,  $\text{C4-H}_2$ ), 3.84 (3H, s,  $\text{C17/18-H}_3$ ), 3.83 (3H, s,  $\text{C17/18-H}_3$ ), 3.56 (2H, t,  $J = 7.0$  Hz,  $\text{C9-H}_2$ ), 2.84 (2H, t,  $J = 7.0$  Hz,  $\text{C10-H}_2$ ), 2.32 (1H, tt,  $J = 7.0, 4.0$  Hz,  $\text{C2-H}$ ), 0.76-0.72 (2H, m,  $2 \times \text{C1-H}$ ), 0.66-0.58 (2H, m,  $2 \times \text{C1-H}$ );  $^{13}\text{C}$  NMR ( $\text{CDCl}_3$ , 100 MHz):  $\delta$  158.7 (C3), 148.8, 147.4 (C14, C15), 139.8 (C5), 132.4 (C11), 128.6, 127.3, 127.1 (C6, C7, C8), 120.8 (C16), 112.2, 111.2 (C12, C15), 55.9, 55.8 (C17, C18), 49.1 (C9), 44.5 (C4), 34.4 (C10), 28.0 (C2), 8.8 (C1); HRMS: ( $\text{ESI}^+$ ) Calculated for  $\text{C}_{21}\text{H}_{26}\text{N}_2\text{NaO}_3$ : 377.1836. Found  $[\text{M} + \text{Na}]^+$ : 377.1833.

**1-Benzyl-3-(3,4-dimethoxyphenethyl)-3,6-dihydro-1*H*-1,3-diazepine-2,7-dione (**8j**) and 3-Benzyl-1-(3,4-dimethoxyphenethyl)-1,3-diazepane-2,4-dione (**9j**)**

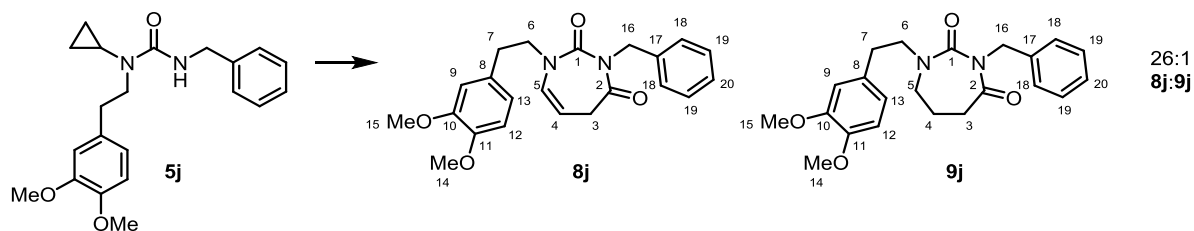

**General Procedure B:** Urea **5j** (53.2 mg, 0.150 mmol) and [Rh(cod)<sub>2</sub>]OTf (2.5 mol%) were employed and the reaction was stirred for 30 h at 100 °C. The crude mixture was purified by column chromatography (50% EtOAc/hexane) to yield the title compound **8j** (43.9 mg, 77%) as a yellow oil. Analysis of the crude reaction mixture by <sup>1</sup>H NMR revealed a 26:1 (**8j**:**9j**) mixture of products. The minor product **9j** was not isolated.

Data for major compound **8j**:  $\nu_{\text{max}}$  / cm<sup>-1</sup>: 2936 (m), 1699 (s), 1649 (s), 1515 (s), 1410 (s), 1263 (s), 1214 (s), 1028 (s); <sup>1</sup>H NMR (CDCl<sub>3</sub>, 400 MHz):  $\delta$  7.32-7.21 (5H, m, 2 × C18-H, 2 × C19-H, C20-H), 6.74 (1H, d, *J* = 8.0 Hz, C12-H), 6.69 (1H, d, *J* = 2.0 Hz, C9-H), 6.60 (1H, dd, *J* = 8.0, 2.0 Hz, C13-H), 5.87 (1H, d, *J* = 7.0 Hz, C5-H), 5.46 (dt, *J* = 7.0, 7.0 Hz, C4-H), 5.01 (2H, s, C16-H<sub>2</sub>), 3.85-3.78 (8H, m, C6-H<sub>2</sub>, C14-H<sub>3</sub>, C15-H<sub>3</sub>), 2.93 (2H, d, *J* = 7.0 Hz, C3-H<sub>2</sub>), 2.82 (2H, t, *J* = 7.0 Hz, C7-H); <sup>13</sup>C NMR (CDCl<sub>3</sub>, 100 MHz):  $\delta$  170.1 (C2), 153.6 (C1), 149.0 (C10), 147.8 (C11), 137.7 (C17), 130.8 (C5), 130.4 (C8), 128.4, 127.8, 127.2 (C18, C19, C20), 120.9 (C13), 112.5 (C4), 111.9 (C9), 111.2 (C12), 55.9, 55.9 (C14, C15), 51.5 (C6), 48.0 (C16), 34.8 (C3), 33.9 (C7); HRMS: (ESI<sup>+</sup>) Calculated for C<sub>22</sub>H<sub>24</sub>N<sub>2</sub>NaO<sub>4</sub>: 403.1628. Found [M + Na]<sup>+</sup>: 403.1635.

Data for minor compound **9j**: *Characteristic signals only*: <sup>1</sup>H NMR (CDCl<sub>3</sub>, 400 MHz):  $\delta$  2.47 (2H, t, *J* = 7.0 Hz, C3-H<sub>2</sub>).

**4-Benzyl-10,11-dimethoxy-1,7,8,12*b*-tetrahydro-[1,3]diazepino[7,1-*a*]isoquinoline-3,5(2*H*,4*H*)-dione (**10j**)**

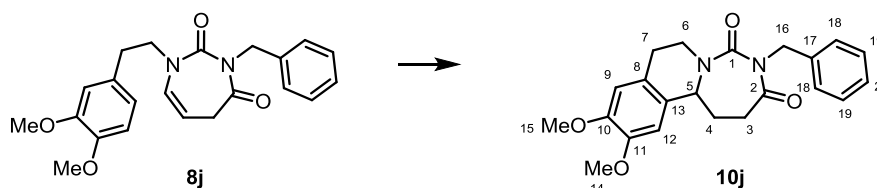

A solution of urea **8j** (43.1 mg, 0.113 mmol) and TFA (87.0  $\mu$ L, 1.13 mmol) in  $\text{CH}_2\text{Cl}_2$  (1 mL) was heated in a sealed tube at 60  $^\circ\text{C}$  for 24 h. The reaction mixture was cooled to r.t. and sat. aq.  $\text{NaHCO}_3$  (20 mL) was added. The solution was extracted with  $\text{CH}_2\text{Cl}_2$  ( $3 \times 15$  mL) and the organic extracts were combined, dried over  $\text{Na}_2\text{SO}_4$  and concentrated *in vacuo*. The residue was purified by column chromatography (60% EtOAc/hexane) to yield the title compound **10j** (39.2 mg, 91%) as a colorless solid; m.p. 176-178  $^\circ\text{C}$  ( $\text{CH}_2\text{Cl}_2$ /hexane);  $\nu_{\text{max}}$  /  $\text{cm}^{-1}$ : 1693 (s), 1651 (s), 1519 (s), 1430 (s), 1259 (s), 1230 (s), 1163 (s);  $^1\text{H}$  NMR ( $\text{CDCl}_3$ , 500 MHz):  $\delta$  7.39 (2H, dd,  $J = 7.5, 1.5$  Hz,  $2 \times \text{C18-H}$ ), 7.30-7.21 (3H, m,  $2 \times \text{C19-H}$ ,  $\text{C20-H}$ ), 6.67 (1H, s,  $\text{C9-H}$ ), 6.50 (1H, s,  $\text{C12-H}$ ), 4.98 (1H, d,  $J = 14.5$  Hz,  $1 \times \text{C16-H}$ ), 4.86 (1H, d,  $J = 14.5$  Hz,  $1 \times \text{C16-H}$ ), 4.65 (1H, dd,  $J = 13.0, 5.5$  Hz,  $\text{C5-H}$ ), 3.94 (1H, ddd,  $J = 12.5, 7.5, 4.5$  Hz,  $1 \times \text{C6-H}$ ), 3.87 (3H, s,  $\text{C14/15-H}_3$ ), 3.83 (3H, s,  $\text{C14/15-H}_3$ ), 3.62 (1H, ddd,  $J = 12.5, 7.5, 4.5$  Hz,  $1 \times \text{C6-H}$ ), 2.89-2.73 (3H, m,  $1 \times \text{C3-H}$ ,  $2 \times \text{C7-H}$ ), 2.65 (1H, ddd,  $J = 12.5, 6.5, 1.0$  Hz,  $1 \times \text{C3-H}$ ), 2.45 (1H, dddd,  $J = 13.5, 12.0, 6.5, 5.5$  Hz,  $1 \times \text{C4-H}$ ), 2.04 (1H, m,  $1 \times \text{C4-H}$ );  $^{13}\text{C}$  NMR ( $\text{CDCl}_3$ , 125 MHz):  $\delta$  171.7 (C2), 157.3 (C1), 148.2, 148.0 (C10, C11), 137.8 (C17), 128.5, 128.5, 127.4 (C18, C19, C20), 126.7 (C13), 126.4 (C8), 111.3 (C9), 109.0 (C12), 50.1, 56.0 (C14, C15), 55.3 (C5), 47.1 (C16), 41.1 (C6), 35.2 (C4), 34.4 (C3), 28.3 (C7); HRMS: (ESI $^+$ ) Calculated for  $\text{C}_{22}\text{H}_{24}\text{N}_2\text{NaO}_4$ : 403.1628. Found  $[\text{M} + \text{Na}]^+$ : 403.1615. *The structure of this compound was determined unambiguously by X-ray crystallography.*

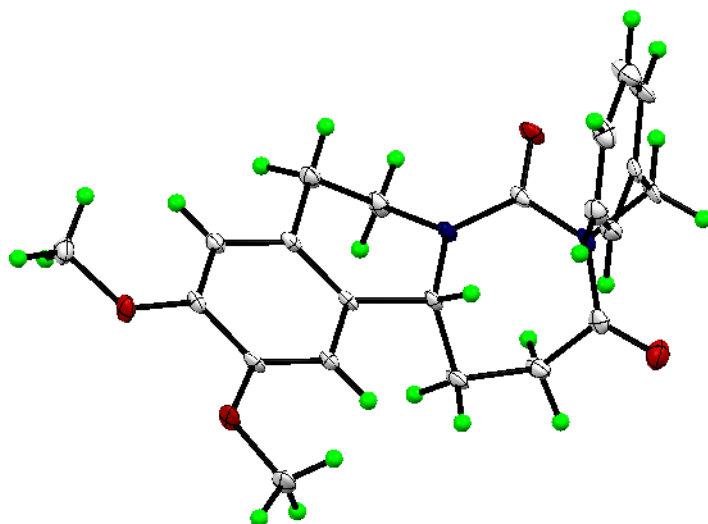

### 3-Benzyl-1-cyclopropyl-1-(2-(thiophen-3-yl)ethyl)urea (**5k**)

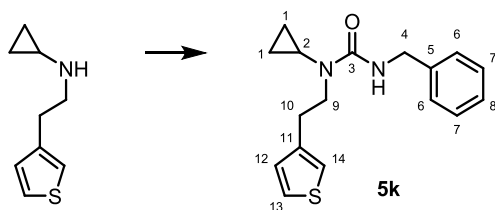

**General procedure A:** *N*-(2-(Thiophen-3-yl)ethyl)cyclopropanamine<sup>5</sup> (418 mg, 2.50 mmol) and benzyl isocyanate (309  $\mu$ L, 2.50 mmol) were employed. The crude mixture was purified by column chromatography (25% EtOAc/hexane) to yield the title compound **5k** (640 mg, 85%) as a colorless solid; m.p. 77-79 °C ( $\text{CH}_2\text{Cl}_2$ /hexane);  $\nu_{\text{max}}$  /  $\text{cm}^{-1}$ : 3380 (m), 1643 (s), 1504 (s), 1344 (m), 1304 (s);  $^1\text{H}$  NMR ( $\text{CDCl}_3$ , 500 MHz):  $\delta$  7.35-7.21 (6H, m,  $2 \times \text{C6-H}$ ,  $2 \times \text{C7-H}$ ,  $\text{C8-H}$ ,  $\text{C13-H}$ ), 7.03-6.97 (2H, m,  $\text{C12-H}$ ,  $\text{C14-H}$ ), 5.52 (1H, br. s,  $\text{NH}$ ), 4.47 (2H, d,  $J = 5.5$  Hz,  $\text{C4-H}_2$ ), 3.60 (2H, t,  $J = 7.0$  Hz,  $\text{C9-H}_2$ ), 2.93 (2H, t,  $J = 7.0$  Hz,  $\text{C10-H}_2$ ), 2.33 (1H, tt,  $J = 6.5, 4.0$  Hz,  $\text{C2-H}$ ), 0.81-0.70 (2H, m,  $2 \times \text{C1-H}$ ), 0.67-0.60 (2H, m,  $2 \times \text{C1-H}$ );  $^{13}\text{C}$  NMR ( $\text{CDCl}_3$ , 125 MHz):  $\delta$  158.6 ( $\text{C3}$ ), 140.0, 139.8 ( $\text{C5}$ ,  $\text{C11}$ ), 128.6, 128.5, 127.4, 127.1 ( $\text{C6}$ ,  $\text{C7}$ ,  $\text{C8}$ ,  $\text{C12}$ ), 125.3 ( $\text{C13}$ ), 121.1 ( $\text{C14}$ ), 48.1 ( $\text{C9}$ ), 44.6 ( $\text{C4}$ ), 29.2 ( $\text{C10}$ ), 27.9 ( $\text{C2}$ ), 8.7 ( $\text{C1}$ ); HRMS: ( $\text{ESI}^+$ ) Calculated for  $\text{C}_{17}\text{H}_{20}\text{N}_2\text{NaOS}$  323.1189. Found  $[\text{M} + \text{Na}]^+$ : 323.1190.

**1-Benzyl-3-(2-(thiophen-3-yl)ethyl)-3,6-dihydro-1*H*-1,3-diazepine-2,7-dione (8k) and 3-Benzyl-1-(2-(thiophen-3-yl)ethyl)-1,3-diazepane-2,4-dione (9k)**

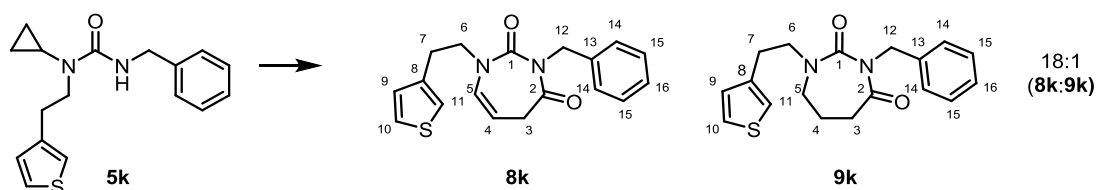

**General Procedure B:** Urea **5k** (53.2 mg, 0.150 mmol) and  $[\text{Rh}(\text{cod})_2]\text{OTf}$  (2.5 mol%) were employed and the reaction was stirred for 30 h at 100 °C. The crude mixture was purified by column chromatography (40% EtOAc/hexane) to yield the title compound **8k** (45.0 mg, 92%) as a yellow oil. Analysis of the crude reaction mixture by  $^1\text{H}$  NMR revealed an 18:1 (**8k**:**9k**) mixture of products. The minor product **9k** was not isolated.

Data for major compound **8k**:  $\nu_{\text{max}}$  /  $\text{cm}^{-1}$ : 2956 (m), 1698 (s), 1647 (s), 1409 (s), 1265 (s), 1213 (s);  $^1\text{H}$  NMR ( $\text{CDCl}_3$ , 400 MHz):  $\delta$  7.32-7.23 (6H, m,  $\text{C10-H}$ ,  $2 \times \text{C14-H}$ ,  $2 \times \text{C15-H}$ ,  $\text{C16-H}$ ), 6.87 (1H, dd,  $J = 5.0, 1.5$  Hz,  $\text{C9-H}$ ), 6.79 (1H, dd,  $J = 3.0, 1.5$  Hz,  $\text{C11-H}$ ), 5.79 (1H, d,  $J = 7.0$  Hz,  $\text{C5-H}$ ), 5.45 (1H, dt,  $J = 7.0, 7.0$  Hz,  $\text{C4-H}$ ), 5.02 (2H, s,  $\text{C12-H}_2$ ), 3.81 (2H, t,  $J = 7.0$  Hz,  $\text{C6-H}_2$ ), 2.94-2.89 (4H, m,  $\text{C3-H}_2$ ,  $\text{C7-H}_2$ );  $^{13}\text{C}$  NMR ( $\text{CDCl}_3$ , 100 MHz):  $\delta$  170.1 ( $\text{C2}$ ),

153.5 (C1), 138.2 (C8), 137.7 (C13), 130.7 (C5), 128.4, 128.0, 127.9, 127.2 (C9, C14, C15, C16), 126.0 (C10), 121.8 (C11), 112.5 (C4), 50.7 (C6), 47.9 (C12), 34.7 (C3), 28.6 (C7); HRMS: (ESI<sup>+</sup>) Calculated for C<sub>18</sub>H<sub>18</sub>N<sub>2</sub>NaO<sub>2</sub>S: 349.0981. Found [M + Na]<sup>+</sup>: 349.0994.

Data for minor compound **9k**: *Characteristic signals only*: <sup>1</sup>H NMR (CDCl<sub>3</sub>, 400 MHz): δ 3.02 (2H, t, *J* = 7.0 Hz, C5-H<sub>2</sub>).

**8-Benzyl-4,10,11,11a-tetrahydrothieno[2',3':3,4]pyrido[1,2-c][1,3]diazepine- 7,9(5H,8H)-dione (10k)**

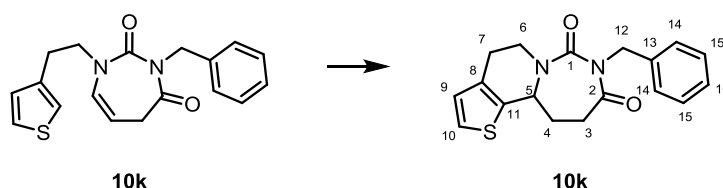

A solution of **10k** (44.0 mg, 0.135 mmol) and TFA (103 μL, 1.35 mmol) in CH<sub>2</sub>Cl<sub>2</sub> (1.5 mL) was heated in a sealed tube at 60 °C for 24 h. The reaction mixture was cooled to r.t. and sat. aq. NaHCO<sub>3</sub> (20 mL) was added. The solution was extracted with CH<sub>2</sub>Cl<sub>2</sub> (3 × 15 mL) and the organic extracts were combined, dried over Na<sub>2</sub>SO<sub>4</sub> and concentrated *in vacuo*. The residue was purified by column chromatography (50% EtOAc/hexane) to yield the title compound **10k** (33.4 mg, 76%) as a colorless solid; m.p.: 114-116 °C (CH<sub>2</sub>Cl<sub>2</sub>/hexane); *v*<sub>max</sub> / cm<sup>-1</sup>: 1695 (s), 1655 (s), 1417 (s), 1336 (s), 1254 (s), 1163 (s); <sup>1</sup>H NMR (CDCl<sub>3</sub>, 400 MHz): δ 7.36-7.34 (2H, m, 2 × C14-H), 7.28-7.19 (3H, m, 2 × C15-H, C16-H), 7.16 (1H, d, *J* = 5.0 Hz, C10-H), 6.78 (1H, d, *J* = 5.0 Hz, C9-H), 4.94 (1H, d, *J* = 14.5 Hz, 1 × C12-H), 4.88 (1H, dd, *J* = 13.0, 5.5 Hz, C5-H), 4.82 (1H, d, *J* = 14.5 Hz, 1 × C12-H), 4.64 (1H, dt, *J* = 13.0, 4.0 Hz, 1 × C6-H), 3.12 (1H, m, 1 × C6-H), 2.76-2.60 (4H, m, C3-H<sub>2</sub>, 2 × C7-H), 2.45 (1H, m, 1 × C4-H), 2.25 (1H, m, 1 × C4-H); <sup>13</sup>C NMR (CDCl<sub>3</sub>, 100 MHz): δ 171.3 (C2), 157.0 (C1), 137.7 (C13), 134.5 (C8), 133.4 (C11), 128.6, 128.5, 127.5 (C14, C15, C16), 126.9 (C9), 123.8 (C10), 53.6 (C5), 47.3 (C12), 39.3 (C6), 34.0 (C7), 33.9 (C4), 25.5 (C3); HRMS: (ESI<sup>+</sup>) Calculated for C<sub>18</sub>H<sub>18</sub>N<sub>2</sub>NaO<sub>2</sub>S: 349.0981. Found [M + Na]<sup>+</sup>: 349.0985. *The structure of this compound was determined unambiguously by X-ray crystallography.*





**General Procedure B:** Urea **5l** (28.5 mg, 0.150 mmol) and [Rh(cod)<sub>2</sub>]BARF (5.0 mol%) were employed and the reaction was stirred for 23 h at 90 °C. The crude mixture was purified by column chromatography (30% EtOAc/hexane) to yield the title compound **9l** (20.3 mg, 62%, 4:1, **9l:8l**) as a yellow oil. Analysis of the crude reaction mixture by <sup>1</sup>H NMR revealed a 4:1 (**9l:8l**) mixture of products.

Data for the mixture of compounds:  $\nu_{\max}$  / cm<sup>-1</sup>: 3300 (m), 2987 (s), 1705 (s), 1537 (s), 1381 (s), 1255 (s).

Data for major compound **9l**: <sup>1</sup>H NMR (CDCl<sub>3</sub>, 400 MHz):  $\delta$  8.79 (1H, br. s, NH), 7.35-7.21 (5H, m, 2  $\times$  C8-H, 2  $\times$  C9-H, C10-H), 4.50 (2H, d,  $J$  = 6.0 Hz, C6-H<sub>2</sub>), 3.89 (2H, t,  $J$  = 7.0 Hz, C5-H<sub>2</sub>), 2.61 (2H, t,  $J$  = 7.0 Hz, C3-H<sub>2</sub>), 2.04 (2H, tt,  $J$  = 7.0, 7.0 Hz, C4-H<sub>2</sub>); <sup>13</sup>C NMR (CDCl<sub>3</sub>, 100 MHz):  $\delta$  177.1 (C2), 153.0 (C1), 138.3 (C7), 128.6, 127.4, 127.3 (C8, C9, C10), 45.7 (C5), 43.8 (C6), 33.4 (C3), 17.1 (C4); HRMS: (ESI<sup>+</sup>) Calculated for C<sub>12</sub>H<sub>14</sub>N<sub>2</sub>NaO<sub>2</sub>: 241.0947. Found [M + Na]<sup>+</sup>: 241.0963. *The structure of this compound was confirmed by 2D NMR. Key HMBC correlations are included on the compound structure above.*

Data for minor compound **8l**: <sup>1</sup>H NMR (CDCl<sub>3</sub>, 400 MHz):  $\delta$  8.79 (1H, br. s, NH), 7.35-7.21 (5H, m, 2  $\times$  C8-H, 2  $\times$  C9-H, C10-H), 6.12 (1H, dd,  $J$  = 7.0, 4.0 Hz, C5-H), 5.44 (1H, dt,  $J$  = 7.0, 7.0 Hz, C4-H), 5.01 (2H, s, C6-H<sub>2</sub>), 3.20 (2H, d,  $J$  = 7.0 Hz, C3-H<sub>2</sub>); <sup>13</sup>C NMR (CDCl<sub>3</sub>, 100 MHz):  $\delta$  169.0 (C2), 154.2 (C1), 137.5 (C7), 128.3, 127.9, 127.3 (C8, C9, C10), 126.0 (C5), 110.1 (C4), 48.0 (C6), 35.2 (C3); HRMS: (ESI<sup>+</sup>) Calculated for C<sub>12</sub>H<sub>12</sub>N<sub>2</sub>O<sub>2</sub>: 216.0899. Found [M]<sup>+</sup>: 216.0898. *The structure of this compound was confirmed by 2D NMR. Key HMBC correlations are included on the compound structure above.*

### 1-Butyl-3-cyclopropylurea (**5m**)

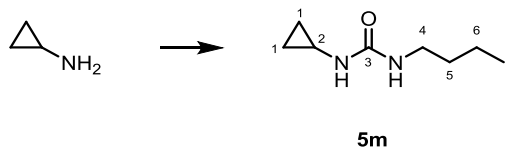

**General procedure A:** Cyclopropylamine (0.76 mL, 11.0 mmol) and *n*-butyl isocyanate (1.13 mL, 10.0 mmol) were employed. The crude mixture was purified by column chromatography (75% EtOAc/hexane) to yield the title compound **5m** (1.29 g, 83%) as a colorless solid; m.p. 73-74 °C (CH<sub>2</sub>Cl<sub>2</sub>/hexane);  $\nu_{\max}$  / cm<sup>-1</sup>: 3305 (m), 2931 (m), 1626 (s), 1564 (s), 1250 (m), 1224 (m); <sup>1</sup>H NMR (CDCl<sub>3</sub>, 400 MHz):  $\delta$  5.00 (1H, br. s, NH), 4.86 (1H, br. s, NH), 3.22 (2H, m, C4-H<sub>2</sub>), 2.41 (1H, m, C2-H), 1.49 (2H, m, C5-H<sub>2</sub>), 1.35 (2H, m, C6-H<sub>2</sub>), 0.92 (3H, t,  $J$  = 7.0

Hz, C7-H<sub>3</sub>), 0.73-0.52 (4H, m, C1-H<sub>2</sub>); <sup>13</sup>C NMR (CDCl<sub>3</sub>, 100 MHz): δ 159.3 (C3), 40.1 (C4), 32.5 (C5), 22.5 (C2), 20.2 (C6), 13.9 (C7), 7.6 (C1); HRMS: (ESI<sup>+</sup>) Calculated for C<sub>8</sub>H<sub>16</sub>N<sub>2</sub>NaO: 179.1155. Found [M + H]<sup>+</sup>: 179.1160.

**3-Butyl-1,3-diazepane-2,4-dione (9m) and 1-Butyl-3,6-dihydro-1H-1,3-diazepine-2,7-dione (8m)**

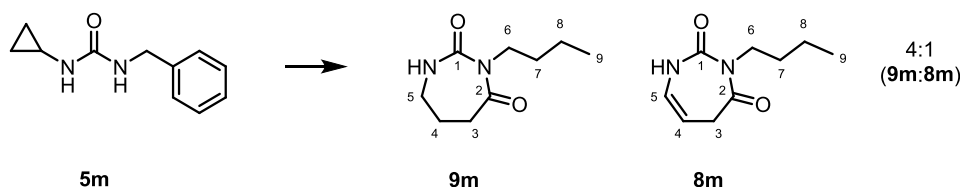

**General Procedure B:** Urea **5m** (23.4 mg, 0.150 mmol) and [Rh(cod)<sub>2</sub>]BARF (5.0 mol%) were employed and the reaction was stirred for 47 h at 90 °C. The crude mixture was purified by column chromatography (40% EtOAc/hexane) to yield the title compound **9m** (19.8 mg, 72%, 5:1, **9m:8m**) as a yellow oil. Analysis of the crude reaction mixture by <sup>1</sup>H NMR revealed a 4:1 (**9m:8m**) mixture of products.

Data for the mixture of compounds:  $\nu_{\max}$  / cm<sup>-1</sup>: 3307 (w), 2958 (w), 1708 (s), 1541 (s), 1381 (s), 1255 (s).

Data for the major product **9m**: <sup>1</sup>H NMR (CDCl<sub>3</sub>, 400 MHz): δ 8.38 (1H, br. s, NH), 3.85 (2H, t, *J* = 7.0 Hz, C5-H<sub>2</sub>), 3.29 (2H, m, C6-H<sub>2</sub>), 2.59 (2H, t, *J* = 8.0 Hz, C3-H<sub>2</sub>), 2.02 (2H, m, C4-H<sub>2</sub>), 1.52 (2H, m, C7-H<sub>2</sub>), 1.36 (2H, m, C8-H<sub>2</sub>), 0.92 (3H, t, *J* = 7.0 Hz, C9-H<sub>3</sub>); <sup>13</sup>C NMR (CDCl<sub>3</sub>, 100 MHz): δ 177.1 (C2), 153.1 (C1), 45.8 (C5), 39.7 (C6), 33.6 (C3), 30.5 (C7), 20.2 (C8), 17.2 (C4), 13.9 (C9); HRMS: (ESI<sup>+</sup>) Calculated for C<sub>9</sub>H<sub>16</sub>N<sub>2</sub>NaO<sub>2</sub>: 207.1104. Found [M + Na]<sup>+</sup>: 207.1100.

Data for the minor product **8m**: *Characteristic signals only*: <sup>1</sup>H NMR (CDCl<sub>3</sub>, 400 MHz): δ 7.49 (1H, br. s, NH), 6.15 (1H, dd, *J* = 7.0, 7.0 Hz, C5-H), 5.42 (1H, m, C4-H), 3.77 (2H, t, *J* = 7.5 Hz, C6-H<sub>2</sub>), 3.14 (2H, d, *J* = 7.0 Hz, C3-H<sub>2</sub>); <sup>13</sup>C NMR (CDCl<sub>3</sub>, 100 MHz): δ 169.3 (C2), 154.9 (C1), 126.1 (C5), 110.4 (C4), 45.3 (C6), 35.5 (C3), 31.8 (C7), 20.2 (C8), 13.9 (C9).

**1-Cyclohexyl-3-cyclopropylurea (5n)**

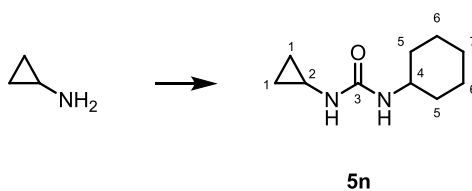

**General Procedure A:** Cyclopropylamine (0.76 mL, 11.0 mmol) and cyclohexyl isocyanate (1.28 mL, 10.0 mmol) were employed to yield the title compound **5n** (1.67 g, 92%) as a colorless solid; m.p.: 125-126 °C (CH<sub>2</sub>Cl<sub>2</sub>/hexane);  $\nu_{\text{max}}$  / cm<sup>-1</sup>: 3325 (s), 2926 (w), 1629 (s), 1568 (s), 1253 (w); <sup>1</sup>H NMR (CDCl<sub>3</sub>, 400 MHz):  $\delta$  4.84 (1H, br. s, NH), 4.60 (1H, br. s, NH), 3.64 (1H, m, C4-H), 2.41 (1H, m, C2-H), 1.95 (2H, m, C5-H<sub>2</sub>), 1.74-1.66 (2H, m, C6-H<sub>2</sub>), 1.64-1.57 (2H, m, C7-H<sub>2</sub>), 1.43-1.33 (2H, m, C6-H<sub>2</sub>), 1.23-1.10 (2H, m, C5-H<sub>2</sub>), 0.73 (2H, m, 2 × C1-H), 0.56 (2H, m, 2 × C1-H); <sup>13</sup>C NMR (CDCl<sub>3</sub>, 100 MHz):  $\delta$  158.5 (C3), 48.8 (C4), 34.0 (C5), 25.8 (C7), 25.1 (C6), 22.5 (C2), 7.7 (C1); HRMS: (ESI<sup>+</sup>) Calculated for C<sub>10</sub>H<sub>18</sub>N<sub>2</sub>NaO: 205.1317. Found [M + Na]<sup>+</sup>: 205.1311.

**3-Cyclohexyl-1,3-diazepane-2,4-dione (9n) and 1-Cyclohexyl-3,6-dihydro-1H-1,3-diazepine-2,7-dione (8n)**

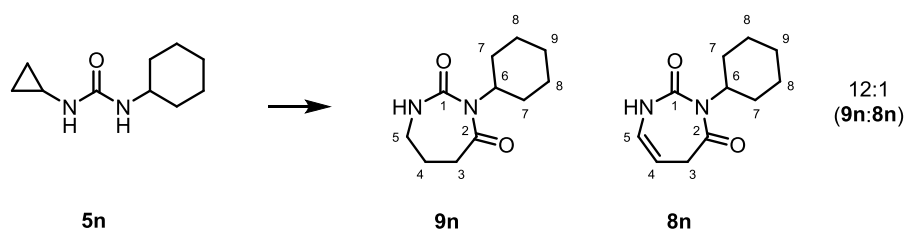

**General Procedure B:** Urea **5n** (27.3 mg, 0.15 mmol) and [Rh(cod)<sub>2</sub>]BARF (5.0 mol%) were employed and the reaction was stirred for 51 h at 90 °C. The crude mixture was purified by column chromatography (25% EtOAc/hexane) to yield the title compound **9n** (21.2 mg, 67%) as a pale yellow oil. Analysis of the crude reaction mixture by <sup>1</sup>H NMR revealed a 12:1 (**9n**:**8n**) mixture of products. The minor product **8n** was not isolated.

Data for the major product **9n**:  $\nu_{\text{max}}$  / cm<sup>-1</sup>: 3291 (br.), 2929 (br.), 2854 (br.), 17.6 (s), 1534 (s), 1380 (m), 1243 (m), 1219 (m); <sup>1</sup>H NMR (CDCl<sub>3</sub>, 400 MHz):  $\delta$  8.35 (1H, br. m, NH), 3.84 (2H, t,  $J$  = 7.0 Hz, C5-H<sub>2</sub>), 3.71 (1H, m, C6-H), 2.58 (2H, t,  $J$  = 8.0 Hz, C3-H<sub>2</sub>), 2.00 (2H, tt,  $J$  = 8.0, 7.0 Hz, C4-H<sub>2</sub>), 1.92-1.88 (2H, m, 2 × C7-H), 1.72-1.67 (2H, m, 2 × C8-H), 1.60-1.55 (1H, m, 1 × C9-H), 1.41-1.31 (2H, m, 2 × C8-H), 1.29-1.15 (3H, m, 2 × C7-H, 1 × C9-H); <sup>13</sup>C NMR (CDCl<sub>3</sub>, 125 MHz):  $\delta$  177.1 (C2), 152.2 (C1), 48.7 (C6), 45.8 (C5), 33.7 (C3), 33.1 (C7),

25.7 (C9), 24.8 (C8), 17.1 (C4); HRMS: (ESI<sup>+</sup>) Calculated for C<sub>11</sub>H<sub>18</sub>N<sub>2</sub>NaO<sub>2</sub>: 233.1260. Found [M + Na]<sup>+</sup>: 233.1256.

Data for the minor product **8n**: *Characteristic signals only*: <sup>1</sup>H NMR (CDCl<sub>3</sub>, 400 MHz): δ 6.16 (1H, dt, *J* = 6.0, 2.0 Hz, C4-H).

### 1-(*tert*-Butyl)-3-cyclopropylurea (**5o**)

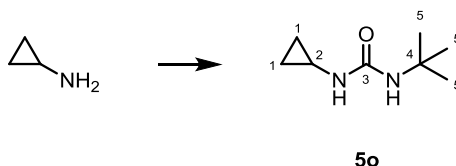

**General Procedure A:** Cyclopropylamine (0.38 mL, 5.50 mmol) and *tert*-butyl isocyanate (0.43 mL, 5.0 mmol) were employed to yield the title compound **5o** (461 mg, 59%) as a colorless solid;  $\nu_{\max}$  / cm<sup>-1</sup>: 3323 (br.), 2965 (m), 1635 (s), 1557 (s), 1453 (m), 1360 (m), 1276 (m), 1218 (s); <sup>1</sup>H NMR (CDCl<sub>3</sub>, 400 MHz): δ 4.86 (1H, br. s, NH), 4.54 (1H, br. s, NH), 2.38 (1H, m, C2-H), 1.35 (9H, s, C5-H<sub>3</sub>), 0.70 (2H, m, 2 × C1-H), 0.53 (2H, m, 2 × C1-H); <sup>13</sup>C NMR (CDCl<sub>3</sub>, 100 MHz): δ 158.4 (C3), 50.5 (C4), 29.6 (C5), 22.7 (C2), 7.6 (C1); HRMS: (ESI<sup>+</sup>) Calculated for C<sub>8</sub>H<sub>16</sub>N<sub>2</sub>NaO: 179.1155. Found [M + Na]<sup>+</sup>: 179.1155.

### 3-(*tert*-Butyl)-1,3-diazepane-2,4-dione (**9o**) and 1-(*tert*-Butyl)-3,6-dihydro-1H-1,3-diazepine-2,7-dione (**8o**)

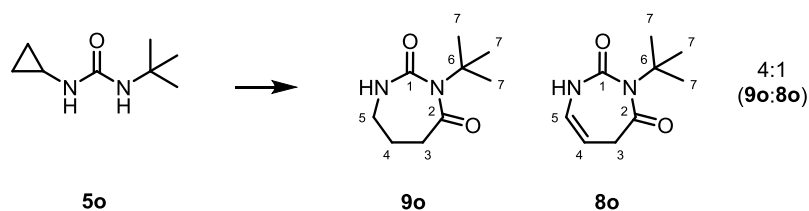

**General Procedure B:** Urea **5o** (23.4 mg, 0.15 mmol) and [Rh(cod)<sub>2</sub>]BARF (5.0 mol%) were employed and the reaction was stirred for 48 h at 90 °C. The crude mixture was purified by column chromatography (50% EtOAc/hexane) to yield the title compound **9o** (21.2 mg, 53%, 5:1, **9o:8o**) as a pale yellow oil. Analysis of the crude reaction mixture by <sup>1</sup>H NMR revealed a 4:1 (**9o:8o**) mixture of products.

Data for the mixture of compounds:  $\nu_{\max}$  / cm<sup>-1</sup>: 3288 (br.), 2966 (br.), 1710 (s), 1547 (s), 1383 (m), 1364 (m), 1263 (9m), 1201 (m).

Data for the major product **9o**:  $^1\text{H}$  NMR ( $\text{CDCl}_3$ , 400 MHz):  $\delta$  8.41 (1H, br. s,  $\text{NH}$ ), 3.82 (2H, t,  $J = 7.0$  Hz,  $\text{C5-H}_2$ ), 2.58 (2H, t,  $J = 8.0$  Hz,  $\text{C3-H}_2$ ), 1.99 (2H, tt,  $J = 8.0, 7.0$  Hz,  $\text{C4-H}_2$ ), 1.37 (9H, s,  $\text{C7-H}_3$ );  $^{13}\text{C}$  NMR ( $\text{CDCl}_3$ , 100 MHz):  $\delta$  177.0 (**C2**), 151.6 (**C1**), 50.9 (**C6**), 45.6 (**C6**), 33.8 (**C3**), 29.0 (**C7**), 17.0 (**C4**); HRMS: ( $\text{ESI}^+$ ) Calculated for  $\text{C}_9\text{H}_{16}\text{N}_2\text{NaO}_2$ : 207.1104. Found  $[\text{M} + \text{Na}]^+$ : 207.1114.

Data for the minor product **8o**: *Characteristic signals only*:  $^1\text{H}$  NMR ( $\text{CDCl}_3$ , 400 MHz):  $\delta$ ; 8.34 (1H, br. s,  $\text{NH}$ ), 6.18 (1H, dt,  $J = 6.0, 2.0$  Hz,  $\text{C5-H}$ ), 4.42 (1H, t,  $J = 2.0$  Hz,  $\text{C4-H}$ ), 1.40 (9H, s,  $\text{C7-H}_3$ );  $^{13}\text{C}$  NMR ( $\text{CDCl}_3$ , 100 MHz):  $\delta$  146.1 (**C5**), 51.0 (**C3**), 29.1 (**C7**).

### 1-Cyclopropyl-3-phenylurea (**5p**)

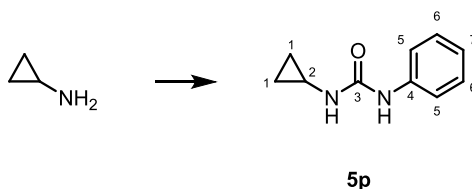

**General procedure A:** Cyclopropylamine (0.76 mL, 11.0 mmol) and phenyl isocyanate (0.90 mL, 10.0 mmol) were employed to yield the title compound **5p** (1.30 g, 74%) as a colorless solid; m.p. 160-161 °C ( $\text{CH}_2\text{Cl}_2$ /hexane);  $\nu_{\text{max}}$  /  $\text{cm}^{-1}$ : 3341 (w), 1642 (s), 1594 (s), 1547 (s), 1242 (s), 741 (s);  $^1\text{H}$  NMR ( $\text{CDCl}_3$ , 400 MHz):  $\delta$  7.38 (2H, m,  $2 \times \text{C5-H}$ ), 7.29 (2H, m,  $2 \times \text{C6-H}$ ), 7.07 (1H, br. s,  $\text{NH}$ ), 7.05 (1H, m,  $\text{C7-H}$ ), 5.17 (1H, br. s,  $\text{NH}$ ), 2.59 (1H, m,  $\text{C2-H}$ ), 0.81 (2H, m,  $2 \times \text{C1-H}$ ), 0.62 (2H, m,  $2 \times \text{C1-H}$ );  $^{13}\text{C}$  NMR ( $\text{CDCl}_3$ , 100 MHz):  $\delta$  156.8 (**C3**), 138.7 (**C4**), 129.2 (**C6**), 123.5 (**C7**), 120.2 (**C5**), 22.7 (**C2**), 7.6 (**C1**); HRMS: ( $\text{ESI}^+$ ) Calculated for  $\text{C}_{10}\text{H}_{12}\text{N}_2\text{NaO}$ : 199.0842. Found  $[\text{M} + \text{Na}]^+$ : 199.0847.

### 3-Phenyl-1,3-diazepane-2,4-dione (**9p**) and 1-Phenyl-3,6-dihydro-1H-1,3-diazepine-2,7-dione (**8p**)

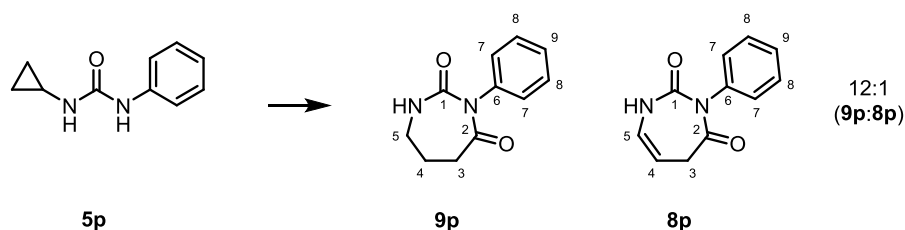

**General Procedure B:** Urea **5p** (26.4 mg, 0.15 mmol) and  $[\text{Rh}(\text{cod})_2]\text{BARF}$  (5.0 mol%) were employed with 1,4-dioxane as solvent and the reaction was stirred for 49 h at 90 °C. The crude

mixture was purified by column chromatography (25% EtOAc/hexane) to yield the title compound **9p** (20.5 mg, 67%, 25:1, **9p:8p**) as a beige solid. Analysis of the crude reaction mixture by  $^1\text{H}$  NMR revealed a 12:1 (**9p:8p**) mixture of products. The minor product **8p** was not isolated.

Data for the major product **9p**: m.p. 89-92 °C ( $\text{CH}_2\text{Cl}_2$ /hexane);  $\nu_{\text{max}}$  /  $\text{cm}^{-1}$ : 3088 (m), 1719 (s), 1599 (s), 1556 (s), 1379 (s), 1210 (s);  $^1\text{H}$  NMR ( $\text{CDCl}_3$ , 400 MHz):  $\delta$  10.54 (1H, br. s, NH), 7.53 (2H, m,  $2 \times \text{C8-H}$ ), 7.33 (2H, m,  $2 \times \text{C7-H}$ ), 7.10 (1H, t, C9-H), 3.95 (2H, t,  $J = 7.2$  Hz, C5-H<sub>2</sub>), 2.69 (2H, t,  $J = 8.0$  Hz, C3-H<sub>2</sub>), 2.09 (2H, dt,  $J = 8.0, 7.0$  Hz, C4-H<sub>2</sub>);  $^{13}\text{C}$  ( $\text{CDCl}_3$ , 100 MHz):  $\delta$  177.3 (C2), 150.1 (C1), 137.4 (C7), 129.0 (C8), 124.0 (C10), 120.0 (C9), 45.7, 33.5 (C3, C5), 16.8 (C4). HRMS: ( $\text{ESI}^+$ ) Calculated for  $\text{C}_{11}\text{H}_{12}\text{N}_2\text{NaO}_2$ : 227.0791. Found  $[\text{M} + \text{Na}]^+$ : 227.0791.

Data for the minor product **8p**: *Characteristic signals only*:  $^1\text{H}$  NMR ( $\text{CDCl}_3$ , 400 MHz):  $\delta$  6.25 (1H, dt,  $J = 6.0, 2.0$  Hz, C4-H).

### 1-Cyclopropyl-3-(4-(trifluoromethyl)phenyl)urea (**5q**)

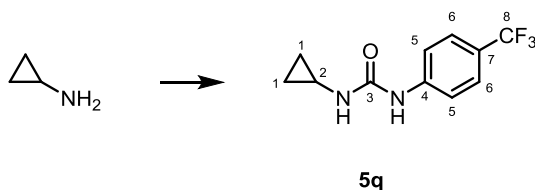

**General procedure A:** Cyclopropylamine (0.38 mL, 5.50 mmol) and 4-(trifluoromethyl)phenyl isocyanate (0.71 mL, 5.00 mmol) were employed to yield the title compound **5q** (1.00 g, 82%) as a colorless solid; m.p. 180-181 °C ( $\text{CHCl}_3$ );  $\nu_{\text{max}}$  /  $\text{cm}^{-1}$ : 3313 (br.), 1651 (s), 1603 (m), 1544 (s), 1326 (s), 1161 (s), 1107 (s), 1062 (s);  $^1\text{H}$  NMR ( $\text{MeOD-d}_4$ , 400 MHz):  $\delta$  7.58-7.51 (4H, m,  $2 \times \text{C5-H}$ ,  $2 \times \text{C6-H}$ ), 2.60 (1H, m, C2-H), 0.75 (2H, m,  $2 \times \text{C1-H}$ ), 0.51 (2H, m,  $2 \times \text{C1-H}$ );  $^{13}\text{C}$  NMR ( $\text{CDCl}_3$ , 100 MHz):  $\delta$  158.9 (C3), 144.6 (C8), 127.0, 119.4 (C5, C6), 23.3 (C2), 7.3 (C1); HRMS: ( $\text{ESI}^+$ ) Calculated for  $\text{C}_{11}\text{H}_{11}\text{F}_3\text{N}_2\text{NaO}$ : 267.0716. Found  $[\text{M} + \text{Na}]^+$ : 267.0714.

### 3-(4-(Trifluoromethyl)phenyl)-1,3-diazepane-2,4-dione (**9q**) and 1-(4-(Trifluoromethyl)phenyl)-3,6-dihydro-1H-1,3-diazepine-2,7-dione (**8q**)

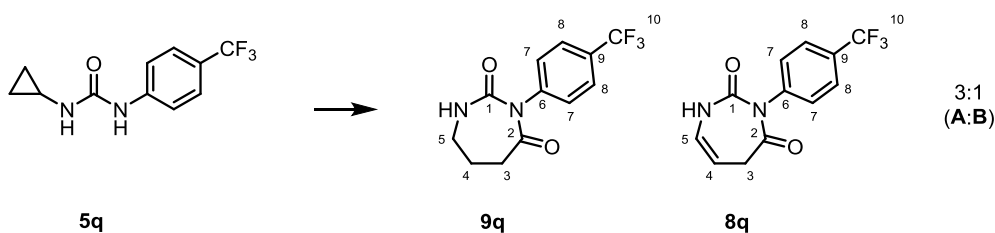

**General Procedure B:** Urea **5q** (36.6 mg, 0.15 mmol) and [Rh(cod)<sub>2</sub>]BARF (5.0 mol%) were employed and the reaction was stirred for 42 h at 90 °C. The crude mixture was purified by column chromatography (30% EtOAc/hexane) to yield the title compound **9q** (29.1 mg, 71%, 3:1, **9q:8q**) as a yellow solid. Analysis of the crude reaction mixture by <sup>1</sup>H NMR revealed a 3:1 (**9q:8q**) mixture of products.

Data for the mixture of compounds:  $\nu_{\text{max}} / \text{cm}^{-1}$ : 3131 (br.), 3075 (br.), 1707 (s), 1692 (s), 1602 (m), 1557 (m), 1325 (m), 1112 (s).

Data for major compound **9q**: <sup>1</sup>H NMR (CDCl<sub>3</sub>, 400 MHz):  $\delta$  10.80 (1H, br. s, NH), 7.72-7.54 (4H, m, 2  $\times$  C7-H, 2  $\times$  C8-H), 3.96 (2H, t,  $J$  = 7.0 Hz, C5-H<sub>2</sub>), 2.71 (2H, t,  $J$  = 8.0 Hz, C3-H<sub>2</sub>), 2.11 (2H, tt,  $J$  = 8.0, 7.0 Hz, C4-H<sub>2</sub>); <sup>13</sup>C NMR (CDCl<sub>3</sub>, 125 MHz):  $\delta$  177.7 (C2), 126.4, 119.7 (C7, C8), 45.8 (C5), 33.6 (C3), 16.9 (C4); HRMS: (ESI<sup>+</sup>) Calculated for C<sub>12</sub>H<sub>11</sub>F<sub>3</sub>N<sub>2</sub>NaO<sub>2</sub>: 295.0665. Found [M + Na]<sup>+</sup>: 295.0659.

Data for minor compound **8q**: <sup>1</sup>H NMR (CDCl<sub>3</sub>, 400 MHz):  $\delta$  10.70 (1H, br. s, NH), 7.72-7.54 (4H, m, 2  $\times$  C7-H, 2  $\times$  C8-H), 7.40 (1H, dt,  $J$  = 6.0, 2.0 Hz, C5-H), 6.29 (1H, dt,  $J$  = 6.0, 2.0 Hz, C4-H), 4.56 (2H, dd,  $J$  = 2.0, 2.0 Hz, C3-H<sub>2</sub>); <sup>13</sup>C NMR (CDCl<sub>3</sub>, 125 MHz):  $\delta$  172.0 (C2), 147.3 (C5), 127.2 (C4), 126.4, 119.7 (C7, C8), 51.4 (C3).

### 1-Cyclopropyl-3-(4-methoxyphenyl)urea (**5q**)

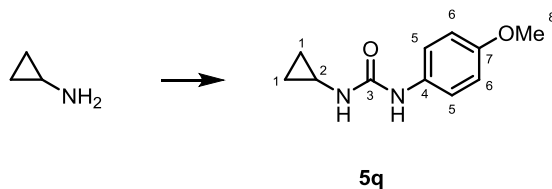

**General procedure A:** Cyclopropylamine (0.76 mL, 11.0 mmol) and 1-isocyanato-4-methoxybenzene (1.09 mL, 10.0 mmol) were employed to yield the title compound **5q** (1.98 g, 96%) as a colorless solid; m.p. 146-149 °C (CH<sub>2</sub>Cl<sub>2</sub>);  $\nu_{\text{max}} / \text{cm}^{-1}$ : 3289 (m), 1637 (s), 1561 (s), 1508 (s), 1243 (s); <sup>1</sup>H NMR (CDCl<sub>3</sub>, 400 MHz):  $\delta$  7.28 (2H, m, 2  $\times$  C6-H), 6.86 (2H, m, 2  $\times$  C5-H), 6.68 (1H, br. s, NH), 3.79 (3H, s, C8-H<sub>3</sub>), 2.58 (1H, m, C2-H), 0.81 (2H, m, 2  $\times$  C1-



H), 0.63 (2H, m, 2 × C1-H); <sup>13</sup>C NMR (CDCl<sub>3</sub>, 100 MHz): δ 156.5 (C7), 131.3 (C4), 123.3 (C6), 114.5 (C5), 55.6 (C8), 22.8 (C2), 7.78 (C1); HRMS: (ESI<sup>+</sup>) Calculated for C<sub>11</sub>H<sub>14</sub>N<sub>2</sub>NaO: 229.0953. Found [M + Na]<sup>+</sup>: 229.0947.

**3-(4-Methoxyphenyl)-1,3-diazepane-2,4-dione (9r) and 1-(4-Methoxyphenyl)-3,6-dihydro-1H-1,3-diazepine-2,7-dione (8r)**

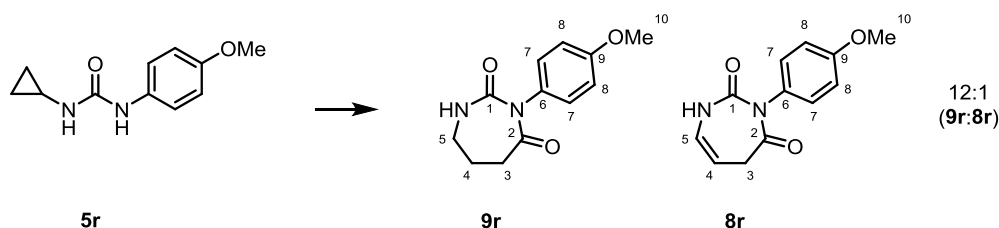

**General Procedure B:** Urea **5r** (30.9 mg, 0.15 mmol) and [Rh(cod)<sub>2</sub>]BARF (5.0 mol%) were employed and the reaction was stirred for 25 h at 90 °C. The crude mixture was purified by column chromatography (30% EtOAc/hexane) to yield the title compound **9r** (22.0 mg, 63%) as a colorless solid. Analysis of the crude reaction mixture by <sup>1</sup>H NMR revealed a 12:1 (**9r**:**8r**) mixture of products. The minor product **8r** was not isolated.

Data for major compound **9r**: m.p. 114-116 °C (CH<sub>2</sub>Cl<sub>2</sub>/hexane); ν<sub>max</sub> / cm<sup>-1</sup>: 2918 (m), 1702 (s), 1552 (s), 1511 (s), 1382 (s), 1212 (s); <sup>1</sup>H NMR (CDCl<sub>3</sub>, 400 MHz): δ 10.4 (1H, br. s, NH), 7.42 (2H, m, 2 × C8-H), 6.86 (2H, m, 2 × C7-H), 3.94 (2H, t, *J* = 7.0 Hz, C5-H<sub>2</sub>), 3.78 (3H, s, C10-H<sub>3</sub>), 2.68 (2H, t, *J* = 8.0 Hz, C3-H<sub>2</sub>), 2.07 (2H, tt, *J* = 8.0, 7.0 Hz, C4-H<sub>2</sub>); <sup>13</sup>C NMR (CDCl<sub>3</sub>, 100 MHz): δ 177.3 (C2), 156.4 (C9), 150.5 (C1), 130.6 (C6), 121.9 (C8), 114.3 (C7), 55.6 (C10), 45.8 (C5), 33.7 (C3), 16.9 (C4); HRMS: (ESI<sup>+</sup>) Calculated for C<sub>12</sub>H<sub>14</sub>N<sub>2</sub>NaO<sub>3</sub>: 257.0902. Found [M + Na]<sup>+</sup>: 257.08967.

Data for the minor product **8r**: *Characteristic signals only*: <sup>1</sup>H NMR (CDCl<sub>3</sub>, 400 MHz): δ 6.25 (1H, d, *J* = 6.0 Hz, C4-H).

**1,3-Dibenzyl-1-((1S\*,2S\*)-2-methylcyclopropyl)urea (*trans*-5s)**

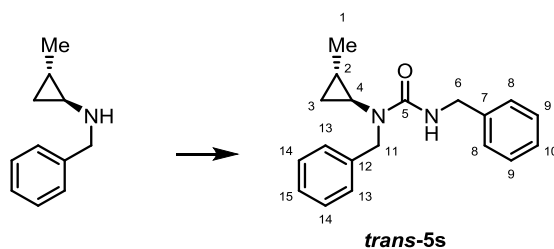

**General procedure A:** (1*S*\*,2*S*\*)-*N*-Benzyl-2-methylcyclopropan-1-amine<sup>5</sup> (968 mg, 6.00 mmol) and benzyl isocyanate (0.74  $\mu$ L, 6.00 mmol) were employed. The crude mixture was purified by column chromatography (30% EtOAc/hexane) to yield the title compound ***trans*-5s** (1.58 g, 89%) as a colorless oil; m.p. 49-51 °C (CH<sub>2</sub>Cl<sub>2</sub>/hexane);  $\nu_{\text{max}}$  / cm<sup>-1</sup>: 3363 (m), 2957 (m), 1631 (s), 1504 (s), 1454 (s), 1221 (s); <sup>1</sup>H NMR (CDCl<sub>3</sub>, 400 MHz):  $\delta$  7.36-7.22 (10H, m, 2  $\times$  C8-H, 2  $\times$  C9-H, C10-H, 2  $\times$  C13-H, 2  $\times$  C14-H, C15-H), 5.48 (1H, t,  $J$  = 5.5 Hz, NH), 4.62-4.49 (4H, m, C6-H<sub>2</sub>, C11-H<sub>2</sub>), 2.02 (1H, ddd,  $J$  = 7.0, 7.0, 3.5 Hz, C4-H), 1.11 (1H, m, C2-H), 0.97 (3H, d,  $J$  = 6.0 Hz, C1-H<sub>3</sub>), 0.91 (1H, m, 1  $\times$  C3-H), 0.55 (1H, m, 1  $\times$  C3-H); <sup>13</sup>C NMR (CDCl<sub>3</sub>, 100 MHz):  $\delta$  159.0 (C5), 139.8, 139.0 (C7, C12), 128.7, 128.5, 128.1, 127.5, 127.3, 127.1 (C8, C9, C10, C13, C14, C15), 50.3 (C11), 45.0 (C6), 35.3 (C4), 16.9 (C1), 16.8 (C3), 16.6 (C2); HRMS: (ESI<sup>+</sup>) Calculated for C<sub>19</sub>H<sub>22</sub>N<sub>2</sub>NaO: 317.1624. Found [M + Na]<sup>+</sup>: 317.1632. *The structure and relative stereochemistry of this compound was determined unambiguously by X-ray crystallography.*

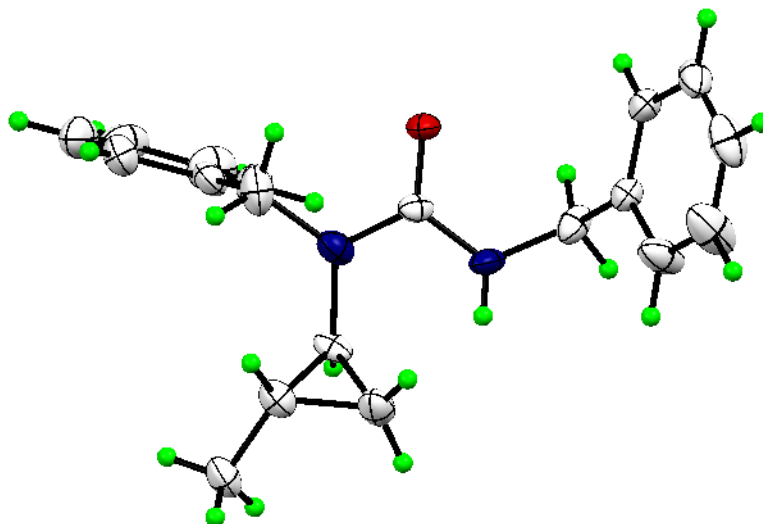

### 1,3-Dibenzyl-1-((1*S*,2*S*)-2-methylcyclopropyl)urea ((*S,S*)-*trans*-5s)

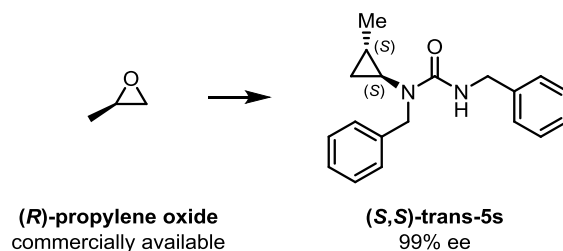

Enantiopure substrate (*S,S*)-*trans*-5s (99% e.e.) was synthesised starting from commercially available (*R*)-propylene oxide according to the literature procedure.<sup>5,7</sup>

$[\alpha]_{\text{D}}^{27} +41.1$  ( $c = 1.2$ ,  $\text{CHCl}_3$ ).

The enantiopurity of this compound was determined by chiral SFC (Chiralpak IB, isocratic  $\text{CO}_2$ -MeOH 88:12, 2.0 mL/min, 40 °C) against a racemic standard;  $t_{\text{R}}$  (major) – 4.8 min and  $t_{\text{R}}$  (minor) – 5.0 min.

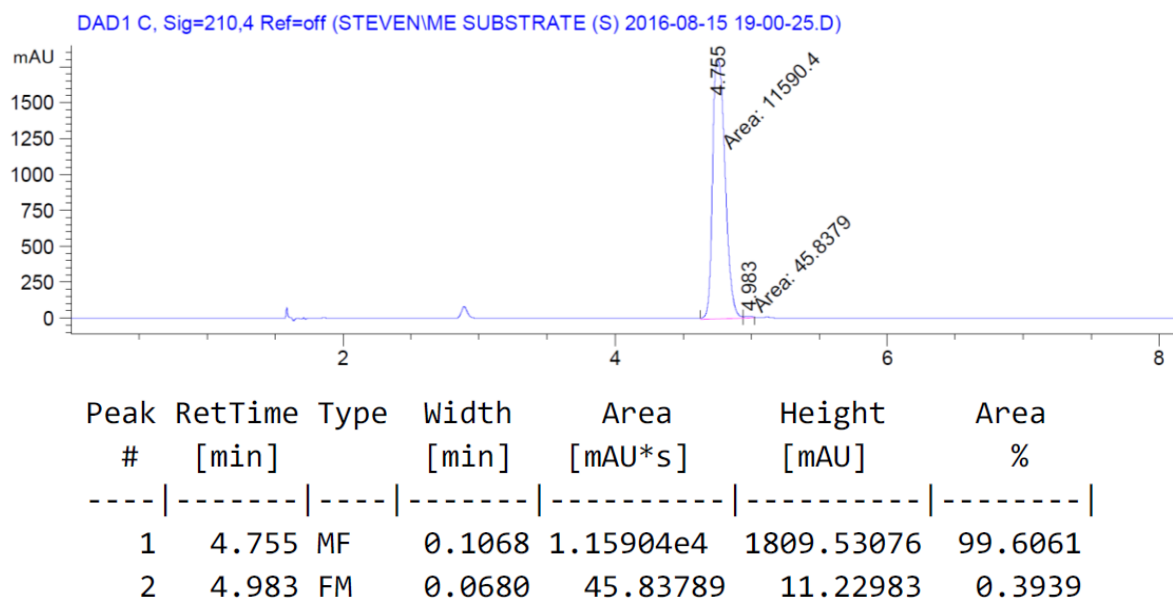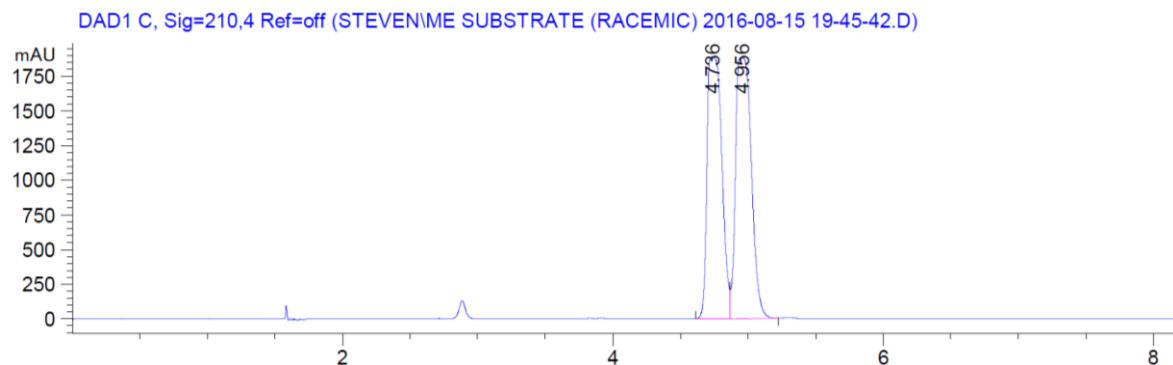

| Peak # | RetTime [min] | Type | Width [min] | Area [mAU*s] | Height [mAU] | Area %  |
|--------|---------------|------|-------------|--------------|--------------|---------|
| 1      | 4.736         | BV   | 0.0902      | 1.43725e4    | 1889.92505   | 48.4774 |
| 2      | 4.956         | VB   | 0.0965      | 1.52754e4    | 1885.69458   | 51.5226 |

### 1,3-Dibenzyl-6-methyl-3,6-dihydro-1*H*-1,3-diazepine-2,7-dione (**8s**)

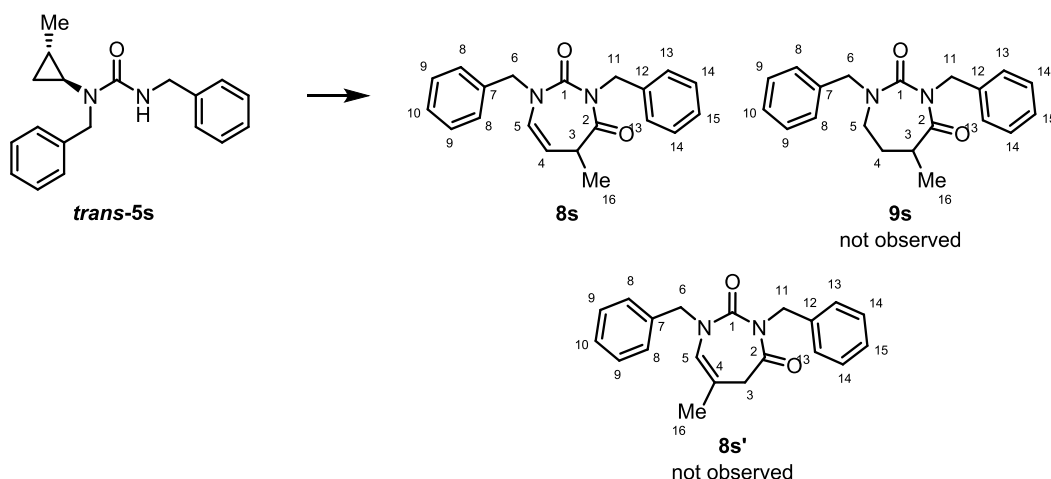

**General Procedure B:** Urea *trans*-**5s** (44.2 mg, 0.15 mmol) and [Rh(cod)<sub>2</sub>]BARF (7.5 mol%) were employed and the reaction was stirred for 73 h at 100 °C. The crude mixture was purified by column chromatography (10% EtOAc/hexane) to yield the title compound **8s** (33.5 mg, 70%) as a yellow oil. Analysis of the crude reaction mixture by <sup>1</sup>H NMR revealed complete selectivity for **8s** over the corresponding saturated product **9s** and C4-substituted regioisomer **8s'**;  $\nu_{\text{max}}$  / cm<sup>-1</sup>: 2987 (m), 1699 (s), 1649 (s), 1402 (s), 1265 (s), 1183 (s), 1076 (s), 1046 (s); <sup>1</sup>H NMR (CDCl<sub>3</sub>, 400 MHz):  $\delta$  7.31-7.22 (8H, m, 2 × C9-H, C10-H, 2 × C13-H, 2 × C14-H, C15-H), 7.07-7.02 (2H, m, 2 × C8-H), 5.99 (1H, dd, *J* = 7.0 Hz, 2.0 Hz, C5-H), 5.27 (1H, d, *J* = 14.5 Hz, 1 × C11-H), 5.21 (1H, dd, *J* = 7.0, 6.0 Hz, C4-H), 4.90 (1H, d, *J* = 14.5 Hz, 1 × C11-H), 4.83 (1H, d, *J* = 15.0 Hz, 1 × C6-H), 4.66 (1H, d, *J* = 15.0 Hz, 1 × C6-H), 3.06 (1H, qdd, *J* = 7.0, 6.0, 2.0 Hz, C3-H), 1.35 (3H, d, *J* = 7.0 Hz, C16-H<sub>3</sub>); <sup>13</sup>C NMR (CDCl<sub>3</sub>, 100 MHz):  $\delta$  172.3 (C2), 154.0 (C1), 137.7 (C12), 136.1 (C7), 128.7, 128.5, 128.4, 128.1, 127.7, 127.6, 127.2 (C5, C8, C9, C10, C13, C14, C15), 120.2 (C4), 52.9 (C6), 48.2 (C11), 38.0 (C3), 13.7 (C16); HRMS: (ESI<sup>+</sup>) Calculated for C<sub>20</sub>H<sub>20</sub>N<sub>2</sub>NaO<sub>2</sub>: 343.1417. Found [M + Na]<sup>+</sup>: 343.1413.

### (*S*)-1,3-Dibenzyl-6-methyl-3,6-dihydro-1*H*-1,3-diazepine-2,7-dione ((*S*)-**8s**)

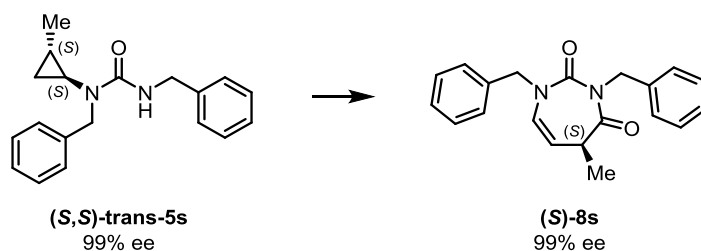

**General Procedure B:** Urea (*S,S*)-**trans-5s** (44.2 mg, 0.15 mmol) and [Rh(cod)<sub>2</sub>]BARF (7.5 mol%) were employed and the reaction was stirred for 74 h at 100 °C. The crude mixture was purified by column chromatography (10% EtOAc/hexane) to yield the title compound (*S*)-**8s** (21.1 mg, 65%, 99% e.e.) as a yellow oil.

$[\alpha]_{\text{D}}^{27} +205.2$  (c = 1.2, CHCl<sub>3</sub>).

The enantiopurity of this compound was determined by chiral SFC (Chiralpak IB, isocratic CO<sub>2</sub>-MeOH 95:5, 1.0 mL/min, 8 °C) against a racemic standard; *t*<sub>R</sub> (major – 16.4 min and *t*<sub>R</sub> (minor) – 17.2 min.

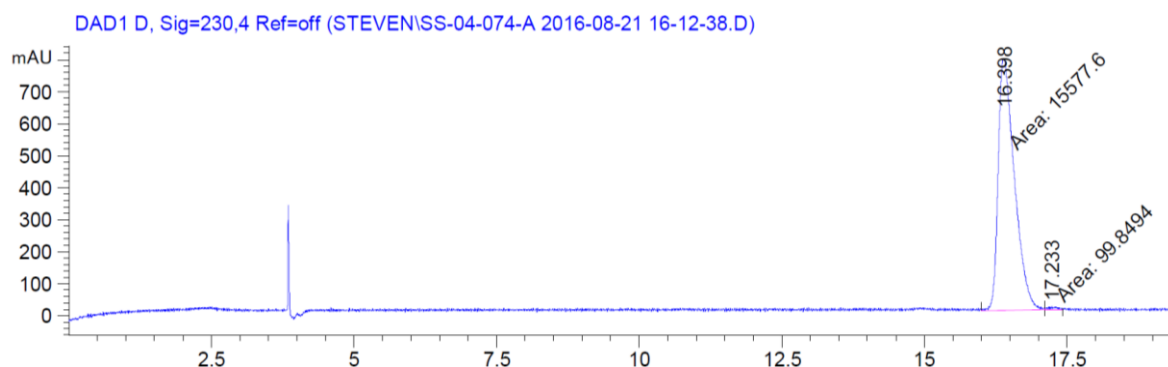

| Peak # | RetTime [min] | Type | Width [min] | Area [mAU*s] | Height [mAU] | Area %  |
|--------|---------------|------|-------------|--------------|--------------|---------|
| 1      | 16.398        | MF   | 0.3310      | 1.55776e4    | 784.31073    | 99.3631 |
| 2      | 17.233        | FM   | 0.1726      | 99.84943     | 9.64204      | 0.6369  |

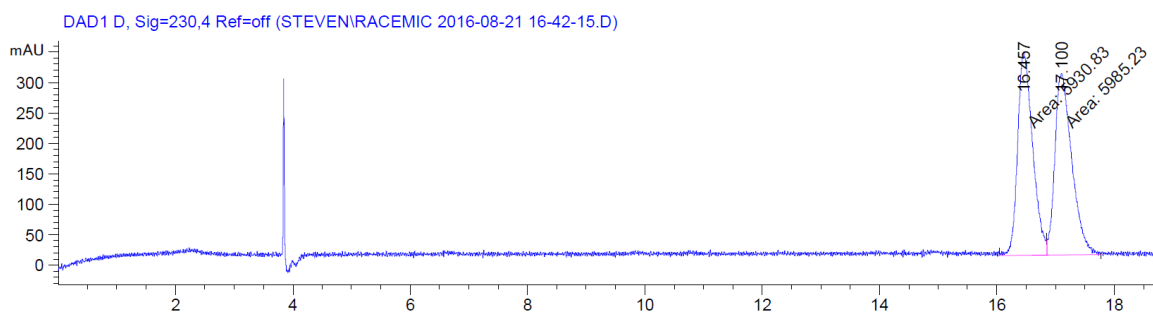

| Peak # | RetTime [min] | Type | Width [min] | Area [mAU*s] | Height [mAU] | Area %  |
|--------|---------------|------|-------------|--------------|--------------|---------|
| 1      | 16.457        | MF   | 0.2961      | 5930.83105   | 333.84116    | 49.7717 |
| 2      | 17.100        | FM   | 0.3346      | 5985.22900   | 298.11276    | 50.2283 |

### 1,3-Dibenzyl-1-((1*R*\*,2*R*\*)-2-butylcyclopropyl)urea (*trans*-5t)

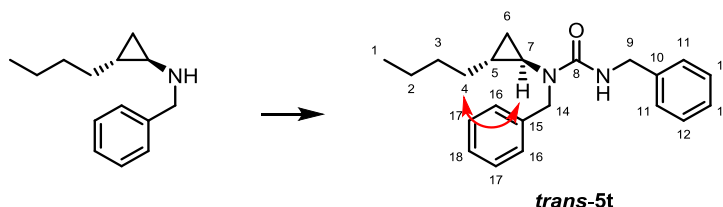

**General procedure A:** (1*R*\*,2*R*\*)-*N*-Benzyl-2-butylcyclopropan-1-amine<sup>5</sup> (497 mg, 2.44 mmol) was employed and the residue was purified by column chromatography (20% EtOAc/hexane) to provide the title compound ***trans*-5t** (677 mg, 82%) as a colorless oil;  $\nu_{\text{max}}$  /  $\text{cm}^{-1}$ : 2956 (m), 2923 (m), 1644 (s), 1513 (s), 1453 (m), 1352 (m), 1267 (m);  $^1\text{H}$  NMR ( $\text{CDCl}_3$ , 400 MHz):  $\delta$  7.37-7.21 (10H, m, 2 x C11-H, 2 x C12-H, C13-H, 2 x C16-H, 2 x C17-H, C18-H), 5.52 (1H, m, NH), 4.57 (2H, s, C14-H<sub>2</sub>), 4.50 (2H, t,  $J$  = 5.0 Hz, C9-H<sub>2</sub>), 2.08 (1H, m, C7-H), 1.26-1.17 (5H, m, 2 x C2-H, 2 x C3-H, 1 x C4-H), 1.12-1.01 (2H, m, 1 x C4-H, 1 x C5-H), 0.87 (1H, m, 1 x C6-H), 0.81 (3H, m, C1-H<sub>3</sub>), 0.55 (1H, m, 1 x C6-H);  $^{13}\text{C}$  NMR ( $\text{CDCl}_3$ , 100 MHz):  $\delta$  159.0 (C8), 139.8 (C10), 139.2 (C15), 128.8, 128.5, 127.9, 127.7, 127.4, 127.0 (C11, C12, C13, C16, C17, C18), 50.5 (C14), 45.0 (C9), 34.5 (C7), 32.1 (C4), 31.1, 22.6 (C2, C3), 22.4 (C5), 15.8 (C6), 14.0 (C1); HRMS: (ESI<sup>+</sup>) Calculated for  $\text{C}_{22}\text{H}_{28}\text{N}_2\text{NaO}$ : 359.2094. Found  $[\text{M} + \text{Na}]^+$ : 359.2094. The relative stereochemistry of this compound was corroborated by *nOe* experiments (as indicated on the compound structure). A strong *nOe* was observed between C7-H and C4-H<sub>2</sub>. No significant *nOe* was observed between C7-H and C5-H.

### 1,3-Dibenzyl-6-butyl-3,6-dihydro-1*H*-1,3-diazepine-2,7-dione (8t)

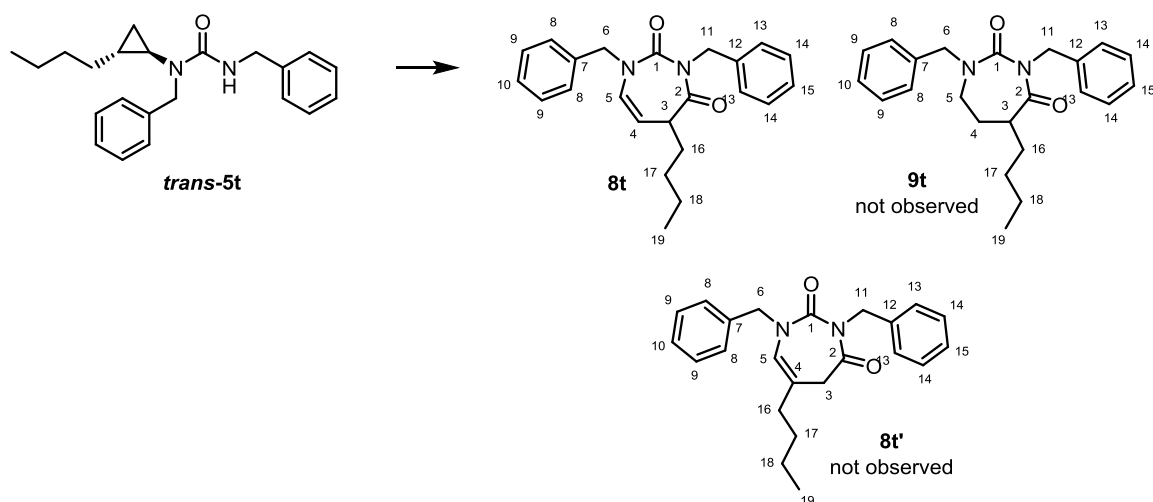

**General Procedure B:** Urea *trans*-**5t** (50.5 mg, 0.15 mmol) and [Rh(cod)<sub>2</sub>]<sub>2</sub>BF<sub>4</sub> (10 mol%) were employed and the reaction was stirred for 45 h at 100 °C. The crude mixture was purified by column chromatography (7.5% EtOAc/hexane) to yield the title compound **8t** (32.2 mg, 59%) as a yellow solid. Analysis of the crude reaction mixture by <sup>1</sup>H NMR revealed complete selectivity for **8t** over the corresponding saturated product **9t** and C4-substituted regioisomer **8t'**; m.p. 88-89 °C (CH<sub>2</sub>Cl<sub>2</sub>/hexane);  $\nu_{\text{max}}$  / cm<sup>-1</sup>: 2954 (m), 1688 (s), 1646 (s), 1446 (m), 1405 (s), 1332 (m), 1272 (m), 1181 (m); <sup>1</sup>H NMR (CDCl<sub>3</sub>, 400 MHz):  $\delta$  7.31-7.21 (8H, m, 2 × C9-H, C10-H, 2 × C13-H, 2 × C14-H, C15-H), 7.06-7.03 (2H, m, 2 × C8-H), 6.01 (1H, dd, *J* = 7.0, 2.0 Hz, C5-H), 5.26-5.23 (2H, m, C4-H, 1 × C11-H), 4.90 (1H, d, *J* = 14.5 Hz, 1 × C11-H), 4.81 (1H, d, *J* = 15.0 Hz, 1 × C6-H), 4.68 (1H, d, *J* = 15.0 Hz, 1 × C6-H), 2.89 (1H, m, C3-H), 1.96 (1H, m, 1 × C16-H), 1.64 (1H, m, 1 × C16-H), 1.33-1.25 (4H, m, 2 × C17-H, 2 × C18-H), 0.89 (3H, m, C19-H<sub>3</sub>); <sup>13</sup>C NMR (CDCl<sub>3</sub>, 125 MHz):  $\delta$  171.8 (C2), 154.2 (C1), 137.9 (C12), 136.3 (C7), 129.0, 128.8, 128.5, 128.2, 127.9, 127.7, 127.3 (C5, C8, C9, C10, C13, C14, C15), 119.7 (C4), 22.9 (C6), 48.2 (C11), 43.7 (C3), 29.3 (C17), 27.9 (C16), 22.5 (C18), 14.1 (C9); HRMS: (ESI<sup>+</sup>) Calculated for C<sub>23</sub>H<sub>26</sub>N<sub>2</sub>NaO<sub>2</sub>: 385.1886. Found [M + Na]<sup>+</sup>: 385.1891.

**1,3-Dibenzyl-1-((1*R*\*,2*S*\*)-2-cyclohexylcyclopropyl)urea (*trans*-**5u**)**

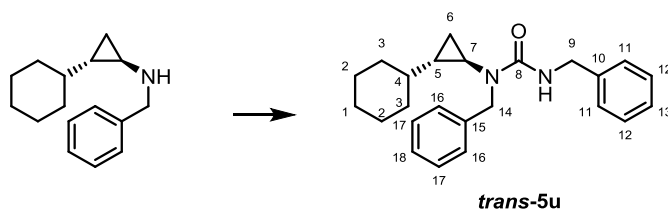

**General procedure A:** (1*R*\*,2*S*\*)-*N*-Benzyl-2-cyclohexylcyclopropan-1-amine<sup>5</sup> (355 mg, 1.55 mmol) was employed and the residue was purified by column chromatography (15-20%

EtOAc/hexane) to provide the title compound **trans-5u** (500 mg, 89%) as a colorless oil; m.p. 73-74 °C (CH<sub>2</sub>Cl<sub>2</sub>/hexane);  $\nu_{\text{max}}$  / cm<sup>-1</sup>: 3346 (m), 2922 (m), 1630 (s), 1518 (s), 1349 (m), 1221 (m), 696 (s); <sup>1</sup>H NMR (CDCl<sub>3</sub>, 400 MHz):  $\delta$  7.37-7.21 (10H, m, 2 × C11-H, 2 × C12-H, C13-H, 2 × C16-H, 2 × C17-H, C18-H), 5.63 (1H, t,  $J$  = 5.0 Hz, NH), 4.64 (1H, d,  $J$  = 15.5 Hz, 1 × C14-H), 4.51 (1H, d,  $J$  = 15.5 Hz, 1 × C14-H), 4.49 (2H, m, C9-H<sub>2</sub>), 2.20 (1H, m, C7-H), 1.68-1.50 (5H, m, 5 × cyclohexyl CH), 1.13-0.88 (6H, m, C4-H, 5 × cyclohexyl CH), 0.82 (1H, m, 1 × C6-H), 0.64-0.47 (2H, m, C5-H, 1 × C6-H); <sup>13</sup>C NMR (CDCl<sub>3</sub>, 100 MHz):  $\delta$  159.0 (C8), 139.7 (C10), 139.4 (C15), 128.7, 128.5, 127.9, 127.7, 127.4, 126.9 (C11, C12, C13, C16, C17, C18), 50.7 (C14), 45.1 (C9), 41.0 (C5), 33.7 (C7), 32.7, 32.1 (2 × cyclohexyl CH<sub>2</sub>), 28.7 (C4), 26.3, 26.1, 26.1 (3 × cyclohexyl CH<sub>2</sub>), 14.7 (C6); HRMS: (ESI<sup>+</sup>) Calculated for C<sub>24</sub>H<sub>30</sub>N<sub>2</sub>NaO: 385.2256. Found [M + Na]<sup>+</sup>: 385.2342.

### 1,3-Dibenzyl-6-cyclohexyl-3,6-dihydro-1H-1,3-diazepine-2,7-dione (**8u**)

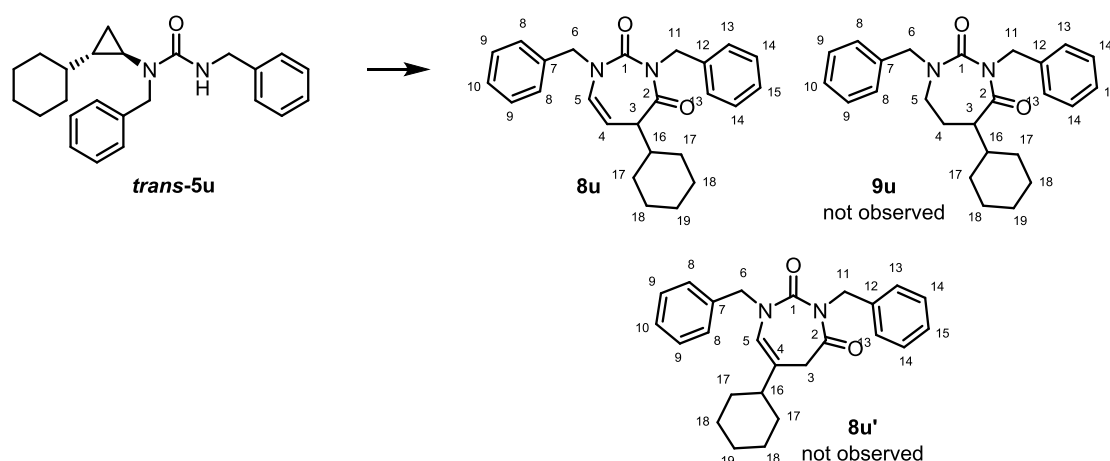

**General Procedure B:** Urea **trans-5u** (54.4 mg, 0.15 mmol) and [Rh(cod)<sub>2</sub>](BF<sub>4</sub>) (7.5 mol%) were employed and the reaction was stirred for 73 h at 100 °C. The crude mixture was purified by column chromatography (7.5% EtOAc/hexane) to yield the title compound **8u** (16.9 mg, 29%) as a yellow oil. Analysis of the crude reaction mixture by <sup>1</sup>H NMR revealed complete selectivity for **8u** over the corresponding saturated product **9u** and C4-substituted regioisomer **8u'**;  $\nu_{\text{max}}$  / cm<sup>-1</sup>: 2923 (m), 2850 (m), 1698 (m), 1646 (s), 1401 (s), 1178 (m); <sup>1</sup>H NMR (CDCl<sub>3</sub>, 400 MHz):  $\delta$  7.30-7.21 (8H, m, 2 × C9-H, C10-H, 2 × C13-H, 2 × C14-H, C15-H), 7.07-7.03 (2H, m, 2 × C8-H), 6.01 (1H, dd,  $J$  = 7.0, 1.5 Hz, C5-H), 5.38 (1H, dd,  $J$  = 7.0, 7.0 Hz, C4-H), 5.18 (1H, d,  $J$  = 14.5 Hz, 1 × C11-H), 4.92 (1H, d,  $J$  = 14.5 Hz, 1 × C11-H), 4.84 (1H, d,  $J$  = 15.0 Hz, 1 × C6-H), 4.63 (1H, d,  $J$  = 15.0 Hz, 1 × C6-H), 2.67 (1H, m, C3-H), 1.96-1.86 (2H, m, C16-H, 1 × C17-H), 1.79 (1H, m, 1 × cyclohexyl CH), 1.70-1.63 (3H, m, 3 × cyclohexyl



CH), 1.34-1.08 (3H, m, 3 × cyclohexyl CH), 0.91-0.79 (2H, m, 1 × C17-H, 1 × cyclohexyl CH);  $^{13}\text{C}$  NMR ( $\text{CDCl}_3$ , 125 MHz):  $\delta$  170.7 (C2), 154.2 (C1), 137.9 (C12), 136.2 (C7), 129.1 (C5), 128.8, 128.5, 128.2, 127.9, 127.8, 127.3 (C8, C9, C10, C13, C14, C15), 117.8 (C4), 52.9 (C6), 50.2 (C3), 48.3 (C11), 35.7 (C16), 31.9 (C17), 30.3, 26.5, 26.1, 25.9 (C17, 2 × C18, C19); HRMS: ( $\text{ESI}^+$ ) Calculated for  $\text{C}_{25}\text{H}_{28}\text{N}_2\text{NaO}_2$ : 411.2043. Found  $[\text{M} + \text{Na}]^+$ : 411.2050.

**1-Benzyl-3-((1*R*\*,2*R*\*)-2-butylcyclopropyl)urea (*trans*-5v)**

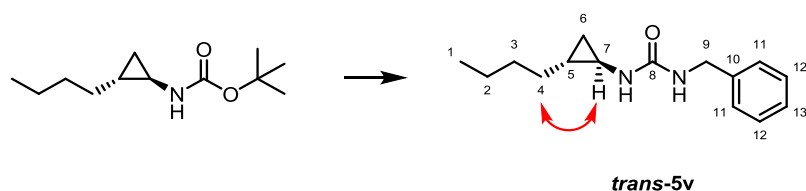

**General procedure C:** *tert*-Butyl ((1*R*\*,2*R*\*)-2-butylcyclopropyl)carbamate<sup>5</sup> (427 mg, 2.00 mmol) was employed and the residue was purified by column chromatography (40% EtOAc/hexane) to provide the title compound ***trans*-5v** (463 mg, 94%) as a colorless solid; m.p. 80-83 °C ( $\text{CH}_2\text{Cl}_2$ /hexane);  $\nu_{\text{max}}$  /  $\text{cm}^{-1}$ : 3318 (m), 2915 (m), 1625 (s), 1570 (s), 1454 (m), 1242 (s), 1067 (m), 696 (s);  $^1\text{H}$  NMR ( $\text{CDCl}_3$ , 400 MHz):  $\delta$  7.35-7.23 (5H, m, 2 × C11-H, 2 × C12-H, C13-H), 5.23 (1H, br. m, NH), 4.74 (1H, br. s, NH), 4.43 (2H, m, C9-H<sub>2</sub>), 2.14 (1H, m, C7-H), 1.35-1.16 (6H, m, 2 × C2-H, 2 × C3-H, 2 × C4-H), 0.94-0.82 (4H, m, C1-H<sub>3</sub>, C5-H), 0.69 (1H, m, 1 × C6-H), 0.51 (1H, m, 1 × C6-H);  $^{13}\text{C}$  NMR ( $\text{CDCl}_3$ , 125 MHz):  $\delta$  159.0 (C8), 139.4 (C10), 128.8, 127.7, 127.4 (C11, C12), 127.4 (C13), 44.4 (C9), 32.0 (C4), 31.3 (C3), 29.1 (C7), 22.5 (C2), 21.5 (C5), 14.9 (C6), 14.1 (C1); HRMS: ( $\text{ESI}^+$ ) Calculated for  $\text{C}_{15}\text{H}_{22}\text{N}_2\text{NaO}$ : 269.1624. Found  $[\text{M} + \text{Na}]^+$ : 269.1618. *The relative stereochemistry of this compound was corroborated by nOe experiments (as indicated on the compound structure). A strong nOe was observed between C7-H to C4-H<sub>2</sub>. No significant nOe was observed between C7-H and C5-H.*

**3-Benzyl-5-butyl-1,3-diazepane-2,4-dione (9v), 1-Benzyl-6-butyl-3,6-dihydro-1*H*-1,3-diazepine-2,7-dione (8v), 3-Benzyl-6-butyl-1,3-diazepane-2,4-dione (9v') and 1-Benzyl-5-butyl-3,6-dihydro-1*H*-1,3-diazepine-2,7-dione (8v')**

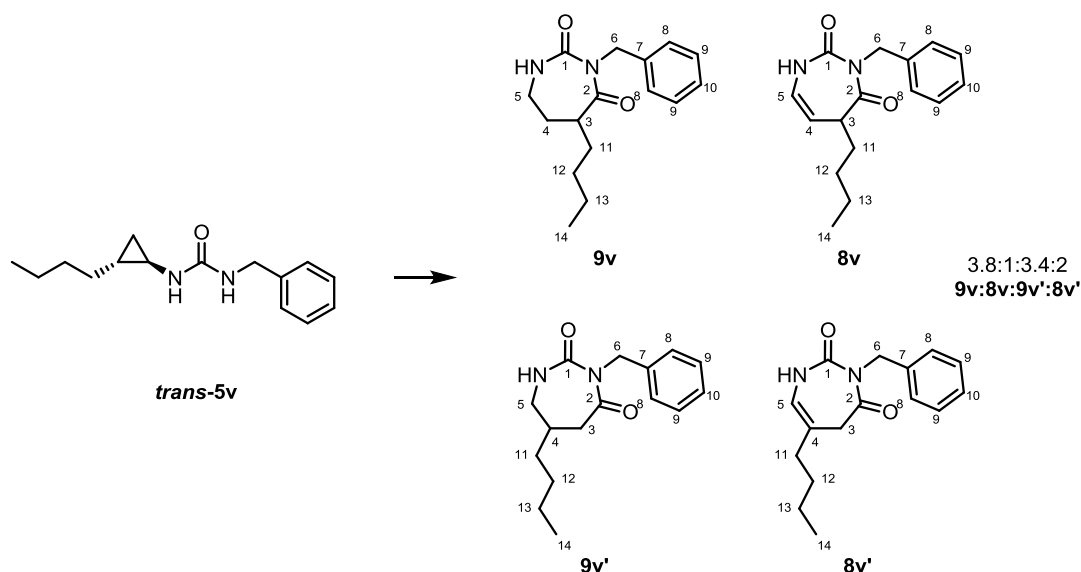

**General Procedure B:** Urea **trans-5v** (36.9 mg, 0.15 mmol) and [Rh(cod)<sub>2</sub>]BARF (5.0 mol%) were employed and the reaction was stirred for 38 h at 100 °C. The crude mixture was purified by column chromatography (20% EtOAc/hexane) to yield the title compounds (28.8 mg, 70%, 3.8:1:3.4:1.9, **9v:8v:9v':8v'**) as a brown oil. Repeated column chromatography allowed the partial separation of the products into two mixtures **A** (15.5 mg, 38%, 4.8:1:6.0, **9v:8v:9v'**) and **B** (10.5 mg, 26%, 1.1:1:2, **9v:8v:8v'**). The products were assigned by analogy to **9y**, **8y**, **9y'** and **8y'** and by 2D NMR (HSQC, HMBC).

Data for the mixture of compounds:  $\nu_{\max}$  / cm<sup>-1</sup>: 3298 (m), 2928 (m), 1705 (s), 1541 (s), 1361 (m), 1272 (m).

Data for product **9v**: *Characteristic signals only*: <sup>1</sup>H NMR (CDCl<sub>3</sub>, 400 MHz):  $\delta$  8.81 (1H, br. s, NH), 7.33-7.24 (5H, m, 2 × C8-H, 2 × C9-H, C10-H), 4.50 (2H, m, C6-H<sub>2</sub>), 3.93 (1H, m, 1 × C5-H), 3.66 (1H, m, 1 × C5-H), 2.60 (1H, m, C3-H), 2.20 (1H, m, 1 × C4-H), 1.68 (1H, m, 1 × C4-H), 1.50-1.24 (6H, m, C11-H<sub>2</sub>, C12-H<sub>2</sub>, C13-H<sub>2</sub>), 0.93-0.89 (3H, m, C14-H<sub>3</sub>); <sup>13</sup>C NMR (CDCl<sub>3</sub>, 100 MHz):  $\delta$  179.2 (C2), 44.4 (C3), 43.9, 43.9 (C5, C6), 24.1 (C4), 14.1 (C14); HRMS: (ESI<sup>+</sup>) Calculated for C<sub>16</sub>H<sub>22</sub>N<sub>2</sub>NaO<sub>2</sub>: 297.1573. Found [M + Na]<sup>+</sup>: 297.1583.

Data for product **8v**: *Characteristic signals only*: <sup>1</sup>H NMR (CDCl<sub>3</sub>, 400 MHz):  $\delta$  7.36-7.22 (5H, m, 2 × C8-H, 2 × C9-H, C10-H), 6.10 (1H, m, C5-H), 5.14 (1H, dd, *J* = 6.5, 6.5 Hz, C4-H), 5.07 (1H, d, *J* = 14.5 Hz, 1 × C6-H), 4.97 (1H, d, *J* = 14.5 Hz, 1 × C6-H), 3.05 (1H, m, C3-H), 2.00 (1H, m, 1 × C11-H), 0.96-0.89 (3H, m, C14-H<sub>3</sub>); <sup>13</sup>C NMR (CDCl<sub>3</sub>, 100 MHz):  $\delta$  124.6 (C5), 117.0 (C4), 48.3 (C6), 43.9 (C3), 28.4 (C11).

Data for product **9v'**: Full characterization data for compound **9v'** is presented on S42.

Data for product **8v'**: Characteristic signals only:  $^1\text{H}$  NMR ( $\text{CDCl}_3$ , 400 MHz):  $\delta$  8.79 (1H, br. s,  $\text{NH}$ ), 7.36-7.22 (5H, m,  $2 \times \text{C8-H}$ ,  $2 \times \text{C9-H}$ ,  $\text{C10-H}$ ), 6.87 (1H, m,  $\text{C5-H}$ ), 4.55 (2H, m,  $\text{C6-H}_2$ ), 4.34 (2H, m,  $\text{C3-H}_2$ ), 2.27 (2H, m,  $\text{C11-H}_2$ ), 1.53 (2H, m,  $\text{C12-H}_2$ ), 1.41-1.28 (2H, m,  $\text{C13-H}_2$ ), 0.93 (3H, m,  $\text{C14-H}_3$ );  $^{13}\text{C}$  NMR ( $\text{CDCl}_3$ , 125 MHz):  $\delta$  138.3 ( $\text{C5}$ ), 49.2 ( $\text{C3}$ ), 43.9 ( $\text{C6}$ ), 25.2 ( $\text{C11}$ ).

**1-Benzyl-3-((1*S*\*,2*S*\*)-2-methylcyclopropyl)urea (*trans*-**5y**) and 1-Benzyl-3-((1*R*\*,2*S*\*)-2-methylcyclopropyl)urea (*cis*-**5y**)**

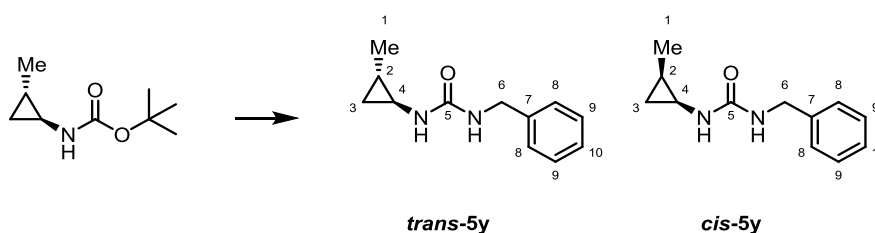

**General procedure C:** 1-Benzyl-3-((1*S*\*,2*S*\*)-2-methylcyclopropyl)urea<sup>5</sup> (700 mg, 4.09 mmol, 5:1 d.r.) was employed and the residue was purified by column chromatography (50% EtOAc/hexane) to provide the title compound (751 mg, 90%, 8:1 d.r., ***trans*-5y:cis-5y**) as a pale brown solid. The product diastereomers were inseparable by column chromatography.

Data for the mixture of compounds: m.p. 102-104 °C ( $\text{CH}_2\text{Cl}_2$ /hexane);  $\nu_{\text{max}}$  /  $\text{cm}^{-1}$ : 3314 (br.), 2956 (m), 1625 (s), 1561 (s), 1246 (s), 1071 (m), 1025 (m).

Data for major product ***trans*-5y**:  $^1\text{H}$  NMR ( $\text{CDCl}_3$ , 400 MHz):  $\delta$  7.37-7.25 (5H, m,  $2 \times \text{C8-H}$ ,  $2 \times \text{C9-H}$ ,  $\text{C10-H}$ ), 5.16 (1H, br. s,  $\text{NH}$ ), 4.68 (1H, br. s,  $\text{NH}$ ), 4.46 (2H, dd,  $J = 5.5, 3.5$  Hz,  $\text{C6-H}_2$ ), 2.13 (1H, m,  $\text{C4-H}$ ), 1.04 (3H, d,  $J = 6.0$ ,  $\text{C1-H}_3$ ), 0.99-0.91 (1H, m,  $\text{C2-H}$ ), 0.73 (1H, m,  $1 \times \text{C3-H}$ ), 0.51 (1H, m,  $1 \times \text{C3-H}$ );  $^{13}\text{C}$  NMR ( $\text{CDCl}_3$ , 100 MHz):  $\delta$  158.9 ( $\text{C5}$ ), 139.5 ( $\text{C6}$ ), 128.8, 127.5, 127.5 ( $\text{C8}$ ,  $\text{C9}$ ,  $\text{C10}$ ), 30.1 ( $\text{C4}$ ), 17.1 ( $\text{C1}$ ), 16.1, 15.8 ( $\text{C2}$ ,  $\text{C3}$ ); HRMS: (ESI<sup>+</sup>) Calculated for  $\text{C}_{12}\text{H}_{16}\text{N}_2\text{NaO}$ : 227.1155. Found  $[\text{M} + \text{Na}]^+$ : 227.1148.

Data for minor product ***cis*-5y**: Characteristic signals only:  $^1\text{H}$  NMR (400 MHz,  $\text{CDCl}_3$ ):  $\delta$  5.23 (1H, br. s,  $\text{NH}$ ), 4.58 (1H, br. s,  $\text{NH}$ ), 2.44 (1H, m,  $\text{C4-H}$ ), 1.10 (3H, d,  $J = 6.0$ ,  $\text{C1-H}_3$ ), 0.17 (1H, m,  $1 \times \text{C3-H}_2$ ).

**3-Benzyl-5-methyl-1,3-diazepane-2,4-dione (9y), 1-Benzyl-6-methyl-3,6-dihydro-1H-1,3-diazepine-2,7-dione (8y), 3-Benzyl-6-methyl-1,3-diazepane-2,4-dione (9y') and 1-Benzyl-5-methyl-3,6-dihydro-1H-1,3-diazepine-2,7-dione (8y')**

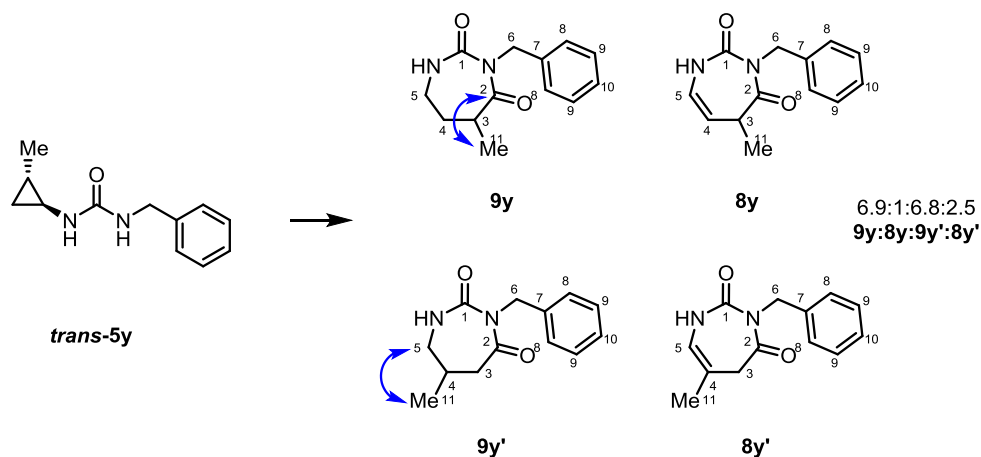

**General Procedure B:** Compound *trans-5y* (30.6 mg, 0.15 mmol, 8:1 d.r.) and [Rh(cod)<sub>2</sub>]BARF (5.0 mol%) were employed and the reaction was stirred for 69 h at 90 °C. The crude mixture was purified by column chromatography (25% EtOAc/hexane) to yield the title compounds as two separate mixtures, **A** (22.3 mg, 64%, 6.3:1:6.3, **9y:8y:9y'**) and **B** (6.2 mg, 18%, 1.3:1:5.6, **9y:9y':8y'**) as colorless oils. *Combined yields and product distribution* (28.5 mg, 81%, 6.9:1:6.8:2.5, **9y:8y:9y':8y'**). *The compounds could not be separated by column chromatography.*

Data for the mixture of compounds:  $\nu_{\text{max}}$  / cm<sup>-1</sup>: 3301 (br.), 2964 (br.), 1708 (s), 1535 (s), 1454 (m), 1358 (m), 1258 (m).

Data for product **9y**: *Characteristic signals only*: <sup>1</sup>H NMR (CDCl<sub>3</sub>, 400 MHz):  $\delta$  8.79-8.74 (1H, br. s, NH), 7.35-7.23 (5H, m, 2  $\times$  C8-H, 2  $\times$  C9-H, C10-H), 4.49 (2H, d,  $J$  = 6.0 Hz, C6-H<sub>2</sub>), 3.93 (1H, m, 1  $\times$  C5-H), 3.66 (1H, m, 1  $\times$  C5-H), 2.75-2.63 (1H, m, C3-H), 2.29-2.21 (1H, m, 1  $\times$  C4-H), 1.64 (1H, m, 1  $\times$  C4-H), 1.23 (3H, d,  $J$  = 7.0 Hz, C11-H<sub>3</sub>); <sup>13</sup>C NMR (CDCl<sub>3</sub>, 125 MHz):  $\delta$  179.6 (C2), 43.9 (C5), 38.3 (C3), 26.3 (C4), 15.5 (C11); HRMS: (ESI<sup>+</sup>) Calculated for C<sub>13</sub>H<sub>16</sub>N<sub>2</sub>NaO<sub>2</sub>: 255.1104. Found [M + Na]<sup>+</sup>: 255.1099. *The regiochemistry of this compound was elucidated by HMBC experiments (as indicated on the compound structure.). A strong HMBC signal was observed between C11-H<sub>3</sub> and C2. No measureable HMBC signal was observed between C11-H<sub>3</sub> and C5 or between C5-H and C11.*

Data for product **8y**: *Characteristic signals only*: <sup>1</sup>H NMR (CDCl<sub>3</sub>, 400 MHz):  $\delta$  7.35-7.23 (5H, m, 2  $\times$  C8-H, 2  $\times$  C9-H, C10-H), 6.06 (1H, m, C5-H), 5.09 (1H, m, C4-H), 5.08 (1H, d,  $J$

= 14.5 Hz, 1 × C6-H), 4.96 (1H, d,  $J$  = 14.5 Hz, 1 × C6-H), 3.20 (1H, m, C3-H), 1.37 (3H, d,  $J$  = 7.0 Hz, C11-H<sub>3</sub>); <sup>13</sup>C NMR (CDCl<sub>3</sub>, 125 MHz): δ 124.3 (C5), 117.8 (C4), 48.3 (C6), 38.3 (C3), 14.2 (C11); HRMS: (ESI<sup>+</sup>) Calculated for C<sub>13</sub>H<sub>14</sub>N<sub>2</sub>NaO<sub>2</sub>: 253.0953. Found [M + Na]<sup>+</sup>: 253.0948. *The structure of this compound was assigned by the similarity of the <sup>1</sup>H NMR signals of the C4 and C5 positions to related structures reported herein. The assignment was supported by 2D NMR experiments (HSQC, HMBC).*

Data for product **9y'**: *Characteristic signals only:* <sup>1</sup>H NMR (CDCl<sub>3</sub>, 400 MHz): δ 8.79-8.74 (1H, br. s, NH), 7.35-7.23 (5H, m, 2 × C8-H, 2 × C9-H, C10-H), 4.50-4.48 (2H, m, C6-H<sub>2</sub>), 4.03 (1H, dd,  $J$  = 11.0, 7.5 Hz, 1 × C5-H), 3.42 (1H, dd,  $J$  = 11.0, 6.5 Hz, 1 × C5-H), 2.72 (1H, m, 1 × C3-H), 2.43 (1H, m, C4-H), 2.25 (1H, m, 1 × C3-H), 1.15 (3H, d,  $J$  = 7.0 Hz, C11-H<sub>3</sub>); <sup>13</sup>C NMR (CDCl<sub>3</sub>, 125 MHz): δ 176.8 (C2), 52.7 (C5), 41.6 (C3), 25.6 (C4), 19.2 (C11); HRMS: (ESI<sup>+</sup>) Calculated for C<sub>13</sub>H<sub>16</sub>N<sub>2</sub>NaO<sub>2</sub>: 255.1104. Found [M + Na]<sup>+</sup>: 255.1099. *The regiochemistry of this compound was elucidated by HMBC experiments (as indicated on the compound structure.). A strong HMBC signal was observed between C11-H<sub>3</sub> and C5 and between C5-H and C11. No measureable HMBC signal was observed between C11-H<sub>3</sub> and C2.*

Data for product **8y'**: *Characteristic signals only:* <sup>1</sup>H NMR (CDCl<sub>3</sub>, 400 MHz): δ 8.78 (1H, br. s, NH), 7.35-7.24 (5H, m, 2 × C8-H, 2 × C9-H, C10-H), 6.91 (1H, m, C5-H), 4.55 (2H, d,  $J$  = 6.0 Hz, C6-H<sub>2</sub>), 4.33 (2H, m, C3-H<sub>2</sub>), 1.91 (3H, m, C11-H<sub>3</sub>); <sup>13</sup>C NMR (CDCl<sub>3</sub>, 125 MHz): δ 139.3 (C5), 128.8, 127.8 (C8, C9), 127.5 (C10), 49.1 (C3), 43.8 (C6), 11.0 (C11); HRMS: (ESI<sup>+</sup>) Calculated for C<sub>13</sub>H<sub>14</sub>N<sub>2</sub>NaO<sub>2</sub>: 253.0953. Found [M + Na]<sup>+</sup>: 253.0948. *The structure of this compound was assigned using 2D NMR experiments (HSQC, HMBC).*

### 1-Benzyl-3-((1*R*\*,2*S*\*)-2-cyclohexylcyclopropyl)urea (*trans*-5z)

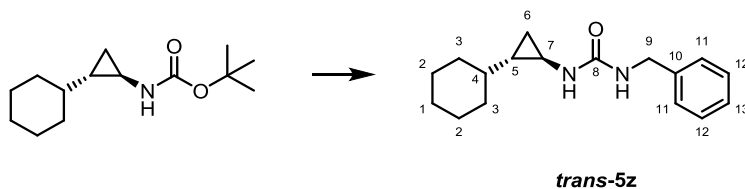

**General procedure C:** *tert*-Butyl ((1*R*\*,2*S*\*)-2-cyclohexylcyclopropyl)carbamate<sup>5</sup> (350 mg, 1.46 mmol) was employed and the residue was purified by column chromatography (40% EtOAc/hexane) to provide the title compound ***trans*-5z** (345 mg, 87%) as a colorless solid; m.p. 80-83 °C (CH<sub>2</sub>Cl<sub>2</sub>/hexane);  $\nu_{\text{max}}$  / cm<sup>-1</sup>: 3319 (br.), 2919 (m), 2847 (m), 1626 (s), 1589 (s), 1577 (s), 1446 (m), 1255 (m), 1235 (m); <sup>1</sup>H NMR (CDCl<sub>3</sub>, 400 MHz): δ 7.35-7.22 (5H, m, 2 × C11-

$\underline{\text{H}}$ ,  $2 \times \text{C12-}\underline{\text{H}}$ ,  $\text{C13-}\underline{\text{H}}$ , 5.27 (1H, br. m,  $\underline{\text{NH}}$ ), 4.68 (1H, br. m,  $\underline{\text{NH}}$ ), 4.42 (2H, m,  $\text{C9-}\underline{\text{H}}_2$ ), 2.19 (1H, m,  $\text{C7-}\underline{\text{H}}$ ), 1.73-1.60 (5H, m,  $5 \times \text{cyclohexyl } \underline{\text{CH}}$ ), 1.18-0.94 (5H, m,  $5 \times \text{cyclohexyl } \underline{\text{CH}}$ ), 0.75 (1H, m,  $\text{C4-}\underline{\text{H}}$ ), 0.64 (1H, m,  $1 \times \text{C6-}\underline{\text{H}}$ ), 0.61-0.51 (2H, m,  $\text{C5-}\underline{\text{H}}$ ,  $1 \times \text{C6-}\underline{\text{H}}$ );  $^{13}\text{C}$  NMR ( $\text{CDCl}_3$ , 125 MHz):  $\delta$  158.9 ( $\text{C8}$ ), 139.3 ( $\text{C10}$ ), 128.7, 127.8, 127.5 ( $\text{C11}$ ,  $\text{C12}$ ,  $\text{C13}$ ), 44.5 ( $\text{C9}$ ), 40.8 ( $\text{C5}$ ), 32.9, 32.3 ( $2 \times \text{cyclohexyl } \underline{\text{CH}}_2$ ), 28.2 ( $\text{C4}$ ), 27.9 ( $\text{C7}$ ), 26.4, 26.2, 26.1 ( $3 \times \text{cyclohexyl } \underline{\text{CH}}_2$ ), 13.7 ( $\text{C6}$ ); HRMS: ( $\text{ESI}^+$ ) Calculated for  $\text{C}_{17}\text{H}_{24}\text{N}_2\text{NaO}$ : 295.1786. Found  $[\text{M} + \text{Na}]^+$ : 295.1775.

**3-Benzyl-5-cyclohexyl-1,3-diazepane-2,4-dione (9z), 1-Benzyl-6-cyclohexyl-3,6-dihydro-1H-1,3-diazepine-2,7-dione (8z), 3-Benzyl-6-cyclohexyl-1,3-diazepane-2,4-dione (9z') and 1-Benzyl-5-cyclohexyl-3,6-dihydro-1H-1,3-diazepine-2,7-dione (8z')**

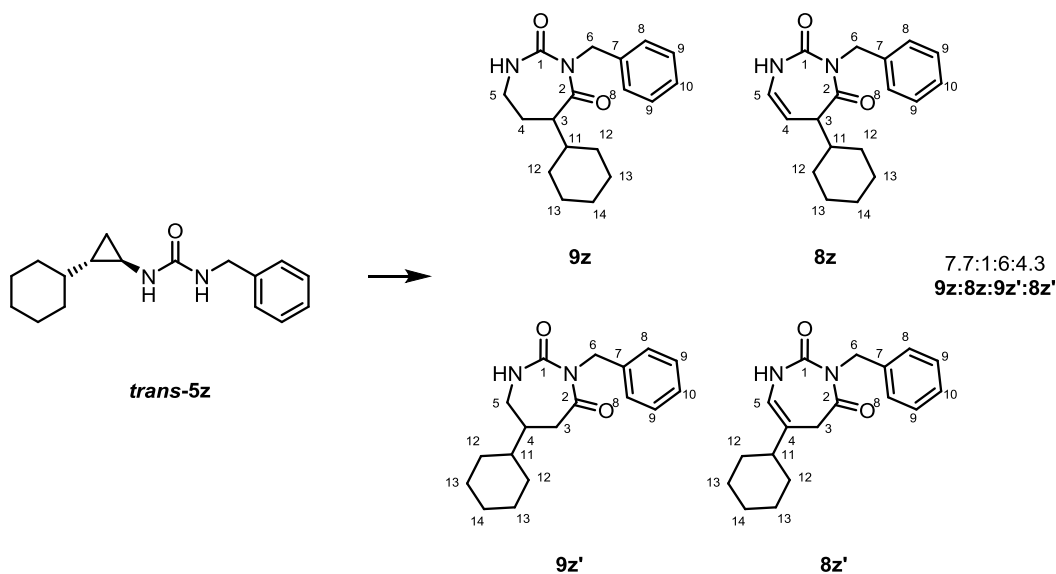

**General Procedure B:** Compound *trans*-5z (40.8 mg, 0.15 mmol) and  $[\text{Rh}(\text{cod})_2]\text{BARF}$  (7.5 mol%) were employed and the reaction was stirred for 72 h at 100 °C. The crude mixture was purified by column chromatography (25% EtOAc/hexane) to yield the title compounds (25.6 mg, 57%, 7.7:1:6:4.3, 9z:8z:9z':8z') as a brown oil; *The compounds could not be separated by column chromatography. The products were assigned by analogy to 9y, 8y, 9y' and 8y'.*

Data for the mixture of compounds:  $\nu_{\text{max}} / \text{cm}^{-1}$ : 3305 (br.), 2923 (m), 2853 (m), 1707 (s), 1537 (s), 1449 (m), 1360 (m), 1259 (m).

Data for product 9z: *Characteristic signals only:*  $^1\text{H}$  NMR ( $\text{CDCl}_3$ , 400 MHz):  $\delta$  3.87 (1H, m,  $1 \times \text{C5-}\underline{\text{H}}$ ), 3.66 (1H, m,  $1 \times \text{C5-}\underline{\text{H}}$ ); HRMS: ( $\text{ESI}^+$ ) Calculated for  $\text{C}_{18}\text{H}_{24}\text{N}_2\text{NaO}_2$ : 323.1730. Found  $[\text{M} + \text{Na}]^+$ : 323.1739.

Data for product **8z**: *Characteristic signals only*:  $^1\text{H}$  NMR ( $\text{CDCl}_3$ , 400 MHz):  $\delta$  6.09 (1H, m, C5-H), 5.27 (1H, t,  $J = 7.0$  Hz, C4-H).

Data for product **9z'**: *Characteristic signals only*:  $^1\text{H}$  NMR ( $\text{CDCl}_3$ , 400 MHz):  $\delta$  4.05 (1H, dd,  $J = 11.0, 8.0$  Hz,  $1 \times$  C5-H), 3.43 (1H, dd,  $J = 11.0, 9.0$  Hz,  $1 \times$  C5-H), 2.62 (1H, m,  $1 \times$  C3-H), 2.35 (1H, m,  $1 \times$  C3-H);  $^{13}\text{C}$  NMR ( $\text{CDCl}_3$ , 125 MHz):  $\delta$  49.8 (C5), 38.2 (C3).

Data for product **8z'**: *Characteristic signals only*:  $^1\text{H}$  NMR ( $\text{CDCl}_3$ , 400 MHz):  $\delta$  6.81 (1H, s, C5-H);  $^{13}\text{C}$  NMR ( $\text{CDCl}_3$ , 125 MHz):  $\delta$  136.8 (C5).

**(1R\*,2S\*)-1,3-Dibenzyl-1-(2-butylcyclopropyl)urea (*cis*-5t)**

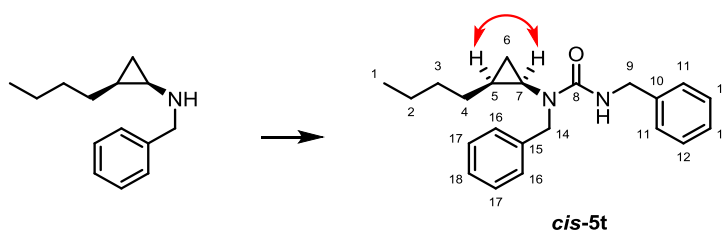

**General procedure A:** (1R\*,2S\*)-N-Benzyl-2-butylcyclopropan-1-amine<sup>8</sup> (508 mg, 2.50 mmol) and benzyl isocyanate (309  $\mu\text{L}$ , 2.50 mmol) were employed. The crude mixture was purified by column chromatography (20% EtOAc/hexane) to yield the title compound ***cis*-5t** (814 mg, 97%) as a colorless solid; m.p.: 44–46 °C ( $\text{CH}_2\text{Cl}_2$ /hexane);  $\nu_{\text{max}}$  /  $\text{cm}^{-1}$ : 3356 (m), 2927 (s), 1639 (s), 1512 (s), 1495 (s), 1453 (s), 1229 (m);  $^1\text{H}$  NMR ( $\text{CDCl}_3$ , 400 MHz):  $\delta$  7.36–7.22 (10H, m,  $2 \times$  C11-H,  $2 \times$  C12-H, C13-H,  $2 \times$  C16-H,  $2 \times$  C17-H, C18-H), 5.54 (1H, t,  $J = 5.5$  Hz, NH), 4.86 (1H, d,  $J = 15.0$  Hz,  $1 \times$  C14-H), 4.56–4.46 (2H, m, C9-H<sub>2</sub>), 4.33 (1H, d,  $J = 15.0$  Hz,  $1 \times$  C14-H), 2.39 (1H, ddd,  $J = 7.5, 6.0, 4.5$  Hz, C7-H), 1.63 (1H, m,  $1 \times$  C4-H), 1.37–1.23 (4H, m, C2-H<sub>2</sub>, C3-H<sub>2</sub>), 1.02–0.81 (6H, m, C1-H<sub>3</sub>,  $1 \times$  C4-H, C5-H,  $1 \times$  C6-H), 0.42 (1H, m,  $1 \times$  C6-H);  $^{13}\text{C}$  NMR ( $\text{CDCl}_3$ , 100 MHz):  $\delta$  159.5 (C8), 139.6 (C10), 139.0 (C15), 128.6, 128.4, 128.1, 127.7, 127.2, 126.9 (C11, C12, C13, C16, C17, C18), 50.6 (C14), 44.9 (C9), 32.7 (C7), 31.7 (C3), 27.1 (C4), 22.5 (C2), 20.7 (C5), 14.0 (C1), 12.6 (C6); HRMS: (ESI<sup>+</sup>) Calculated for  $\text{C}_{22}\text{H}_{29}\text{N}_2\text{O}$ : 337.2274. Found  $[\text{M} + \text{H}]^+$ : 337.2275. The relative stereochemistry of this compound was corroborated by *nOe* experiments (as indicated on the compound structure). A strong *nOe* was observed between C7-H to C5-H. No significant *nOe* was observed between C4-H<sub>2</sub> and C7-H.

**1,3-Dibenzyl-5-butyl-3,6-dihydro-1H-1,3-diazepine-2,7-dione (8t') and 1,3-Dibenzyl-6-butyl-3,6-dihydro-1H-1,3-diazepine-2,7-dione (8t)**

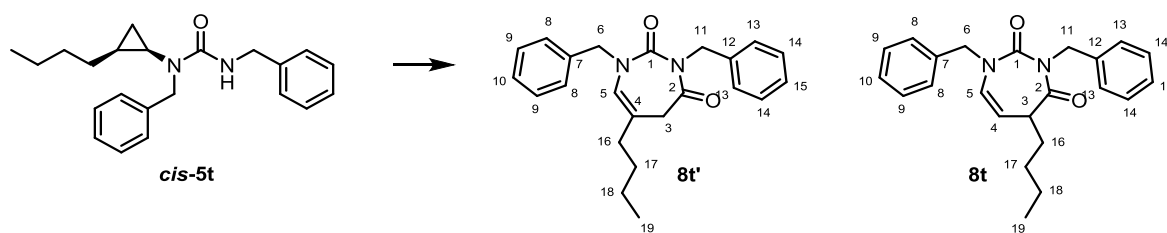

**General Procedure B:** Urea *cis*-**5t** (50.5 mg, 0.15 mmol) and [Rh(cod)<sub>2</sub>]<sub>2</sub>OTf (7.5 mol%) were employed and the reaction was stirred for 73 h at 100 °C. The crude mixture was purified by column chromatography (50% EtOAc/hexane) to yield the title compound **8t'** (34.6 mg, 64%) as a yellow oil. Analysis of the crude reaction mixture by <sup>1</sup>H NMR revealed a 6:1 (**8t'**:**8t**) mixture of products.

Data for major compound **8t'**:  $\nu_{\max}$  / cm<sup>-1</sup>: 1697 (m), 1647 (s), 1412 (m), 1215 (s); <sup>1</sup>H NMR (CDCl<sub>3</sub>, 400 MHz):  $\delta$  7.34-7.24 (8H, m, 2 × C9-H, C10-H, 2 × C13-H, 2 × C14-H, C15-H), 7.08-7.06 (2H, m, 2 × C8-H), 5.75 (1H, t,  $J$  = 1.0 Hz, C5-H), 5.05 (2H, s, C11-H<sub>2</sub>), 4.72 (2H, s, C6-H<sub>2</sub>), 3.04 (2H, s, C3-H<sub>2</sub>), 2.14 (2H, td,  $J$  = 7.0, 1.0 Hz, C16-H<sub>2</sub>), 1.45-1.39 (2H, m, C17-H<sub>2</sub>), 1.27-1.18 (2H, m, C18-H<sub>2</sub>), 0.87 (3H, t,  $J$  = 7.5 Hz, C19-H<sub>3</sub>); <sup>13</sup>C NMR (CDCl<sub>3</sub>, 125 MHz):  $\delta$  169.7 (C2), 154.1 (C1), 137.7 (C12), 136.3 (C7), 128.7, 128.3, 128.1, 128.0, 127.7, 127.6, 127.2 (C4, C8, C9, C10, C13, C14, C15), 124.1 (C5), 53.0 (C6), 47.5 (C11), 39.4 (C3), 33.7 (C16), 29.0 (C17), 21.9 (C18), 13.7 (C19); HRMS: (ESI<sup>+</sup>) Calculated for C<sub>23</sub>H<sub>27</sub>N<sub>2</sub>O<sub>2</sub>: 363.2067. Found [M + H]<sup>+</sup>: 363.2078.

Data for product **8t**: Full characterization data for compound **8t** is presented on S31-S32.

**(1R\*,2S\*)-1-Benzyl-3-(2-butylcyclopropyl)urea (*cis*-**5v**)**

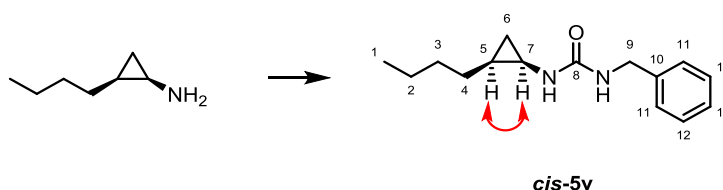

**General procedure A:** (1R\*,2S\*)-2-Butylcyclopropan-1-amine<sup>8</sup> (283 mg, 2.50 mmol) and benzyl isocyanate (309  $\mu$ L, 2.50 mmol) were employed. The crude mixture was purified by column chromatography (75% EtOAc/hexane) to yield the title compound *cis*-**5v** (430 mg, 70%) as a colorless solid; m.p.: 66-68 °C (CH<sub>2</sub>Cl<sub>2</sub>/hexane);  $\nu_{\max}$  / cm<sup>-1</sup>: 3319 (s), 2927 (s), 1625 (s), 1572 (s), 1267 (s), 1240 (s); <sup>1</sup>H NMR (CDCl<sub>3</sub>, 500 MHz):  $\delta$  7.31-7.22 (5H, m, 2 × C11-H, 2 × C12-H, C13-H), 5.44 (1H, br. s, NH), 4.92 (1H, br. s, NH), 4.40 (2H, d,  $J$  = 6.0 Hz, C9-



$\underline{\text{H}_2}$ ), 2.45 (1H, m,  $\text{C7-H}$ ), 1.45 (1H, m,  $1 \times \text{C4-H}$ ), 1.37-1.28 (4H, m,  $\text{C2-H}_2$ ,  $\text{C3-H}_2$ ), 1.19 (1H, m,  $1 \times \text{C4-H}$ ), 0.89-0.84 (4H, m,  $\text{C1-H}_3$ ,  $1 \times \text{C6-H}$ ), 0.13 (1H, m,  $1 \times \text{C6-H}$ );  $^{13}\text{C}$  NMR ( $\text{CDCl}_3$ , 125 MHz):  $\delta$  159.5 ( $\text{C8}$ ), 139.5 ( $\text{C10}$ ), 128.5, 127.4, 127.2 ( $\text{C11}$ ,  $\text{C12}$ ,  $\text{C13}$ ), 44.2 ( $\text{C9}$ ), 31.7 ( $\text{C3}$ ), 27.0 ( $\text{C4}$ ), 26.7 ( $\text{C7}$ ), 22.6 ( $\text{C2}$ ), 18.1 ( $\text{C5}$ ), 14.0 ( $\text{C1}$ ), 12.8 ( $\text{C6}$ ); HRMS: (ESI<sup>+</sup>) Calculated for  $\text{C}_{15}\text{H}_{23}\text{N}_2\text{O}$ : 247.1805. Found  $[\text{M} + \text{H}]^+$ : 247.1804. *The relative stereochemistry of this compound was corroborated by nOe experiments (as indicated on the compound structure). A strong nOe was observed between  $\text{C7-H}$  to  $\text{C5-H}$ . No significant nOe was observed between  $\text{C7-H}$  and  $\text{C4-H}_2$ .*

### 3-Benzyl-6-butyl-1,3-diazepane-2,4-dione (**9v'**) and 3-Benzyl-5-butyl-1,3-diazepane-2,4-dione (**9v**)

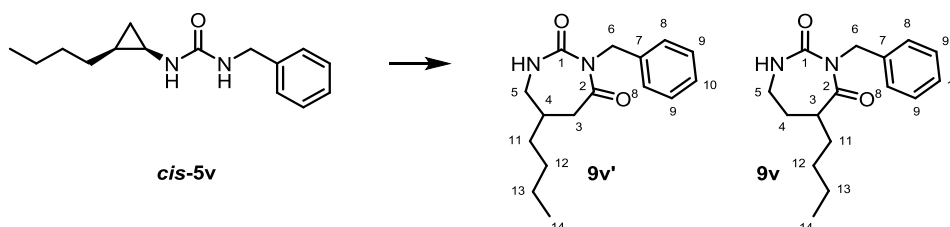

**General Procedure B:** Urea *cis-5v* (37.0 mg, 0.15 mmol) and  $[\text{Rh}(\text{cod})_2]\text{BARF}$  (7.5 mol%) were employed and the reaction was stirred for 38 h at 90 °C. The crude mixture was purified by column chromatography (20% EtOAc/hexane) to yield the title compound **9v'** and **9v** (24.0 mg, 58%, 10:1, **9v'**:**9v**) as a yellow oil. Analysis of the crude reaction mixture by  $^1\text{H}$  NMR revealed a 5:1 (**9v'**:**9v**) mixture of products.

Data for product **9v'**:  $\nu_{\text{max}}$  /  $\text{cm}^{-1}$ : 3304 (m), 2925 (m), 1709 (s), 1537 (s), 1260 (s);  $^1\text{H}$  NMR ( $\text{CDCl}_3$ , 400 MHz):  $\delta$  8.75 (1H, br. s,  $\text{NH}$ ), 7.39-7.20 (5H, m,  $2 \times \text{C8-H}$ ,  $2 \times \text{C9-H}$ ,  $\text{C10-H}$ ), 4.50 (2H, d,  $J = 6.0$  Hz,  $\text{C6-H}_2$ ), 4.04 (1H, dd,  $J = 11.0, 7.5$  Hz,  $1 \times \text{C5-H}$ ), 3.44 (1H, dd,  $J = 11.0, 7.0$  Hz,  $1 \times \text{C5-H}$ ), 2.69 (1H, m,  $1 \times \text{C3-H}$ ), 2.35-2.26 (2H, m,  $1 \times \text{C3-H}$ ,  $\text{C4-H}$ ), 1.52-1.26 (6H, m,  $\text{C11-H}_2$ ,  $\text{C12-H}_2$ ,  $\text{C13-H}_2$ ), 0.91 (3H, t,  $J = 7.0$  Hz,  $\text{C14-H}_3$ );  $^{13}\text{C}$  NMR ( $\text{CDCl}_3$ , 100 MHz):  $\delta$  176.7 ( $\text{C2}$ ), 153.0 ( $\text{C1}$ ), 138.3 ( $\text{C7}$ ), 128.6, 127.6, 127.3 ( $\text{C8}$ ,  $\text{C9}$ ,  $\text{C10}$ ), 51.2 ( $\text{C5}$ ), 43.8 ( $\text{C6}$ ), 39.9 ( $\text{C3}$ ), 33.8 ( $\text{C11}$ ), 30.7 ( $\text{C4}$ ), 29.5 ( $\text{C12}$ ), 22.6 ( $\text{C13}$ ), 13.9 ( $\text{C14}$ ); HRMS: (ESI<sup>+</sup>) Calculated for  $\text{C}_{16}\text{H}_{22}\text{N}_2\text{NaO}_2$ : 297.1573. Found  $[\text{M} + \text{Na}]^+$ : 297.1572.

Data for product **9v**: *Partial characterization data for compound 9v is presented on S34-35.*

**(1R\*,6S\*,7S\*)-Bicyclo[4.1.0]heptan-7-amine hydroiodide (A) and (1R\*,6S\*,7R\*)-Bicyclo[4.1.0]heptan-7-amine hydroiodide (B)**

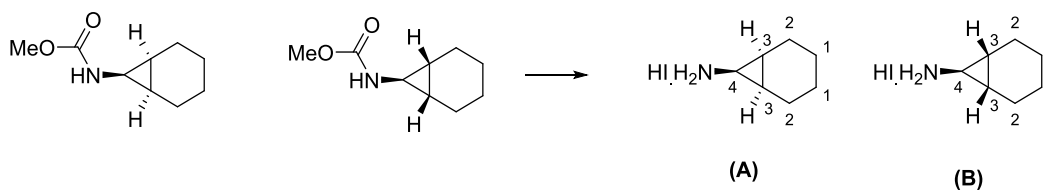

Iodotrimethylsilane (2.45 mL, 17.2 mmol) was added to a stirred solution of methyl ((1*R*\*,6*S*\*,7*S*\*)-bicyclo[4.1.0]heptan-7-yl)carbamate<sup>9</sup> (1.46 g, 8.61 mmol), in CH<sub>2</sub>Cl<sub>2</sub> (86 mL) at r.t.. The reaction mixture was heated at reflux for 1 h before cooling to r.t.. MeOH (17 mL) was added and the reaction mixture was heated at reflux for 30 minutes before cooling to r.t. and concentrated *in vacuo*. The resulting orange solid was suspended in Et<sub>2</sub>O (20 mL) and filtered, washing with Et<sub>2</sub>O, to yield the title compounds (1.79 g, 87%, 3:1 d.r., **A**:**B**) as a brown solid. *The product diastereomers were not separable at this point.*

Data for the mixture of compounds:  $\nu_{\max}$  / cm<sup>-1</sup>: 2922 (s), 1571 (m), 1352 (m), 1066 (s); HRMS: (ESI<sup>+</sup>) Calculated for C<sub>7</sub>H<sub>14</sub>N: 112.1121. Found [M+H]<sup>+</sup>: 112.1123.

Data for major compound **A**: <sup>1</sup>H NMR (MeOD-d<sub>4</sub>, 400 MHz):  $\delta$  2.53 (1H, t, *J* = 8.0 Hz, C4-H), 2.13-2.03 (2H, m, 2  $\times$  C2-H), 1.56-1.46 (2H, m, 2  $\times$  C2-H), 1.46-1.36 (2H, m, 2  $\times$  C1-H), 1.33-1.13 (4H, m, 2  $\times$  C1-H, 2  $\times$  C3-H); <sup>13</sup>C NMR (MeOD-d<sub>4</sub>, 100 MHz):  $\delta$  31.1 (C4), 22.0 (C1), 17.7 (C2), 11.4 (C3).

Data for major compound **B**: <sup>1</sup>H NMR (MeOD-d<sub>4</sub>, 400 MHz):  $\delta$  2.36 (1H, t, *J* = 8.0 Hz, C4-H), 1.98-1.85 (2H, m, 2  $\times$  C2-H), 1.76-1.67 (2H, m, 2  $\times$  C2-H), 1.35-1.07 (6H, m, 4  $\times$  C1-H, 2  $\times$  C3-H); <sup>13</sup>C NMR (MeOD-d<sub>4</sub>, 100 MHz):  $\delta$  34.1 (C4), 22.4 (C2), 21.8 (C1), 17.0 (C3).

**(1*R*\*,6*S*\*,7*S*\*)-N-Benzylbicyclo[4.1.0]heptan-7-amine (A) and (1*R*\*,6*S*\*,7*R*\*)-N-Benzylbicyclo[4.1.0]heptan-7-amine (B)**

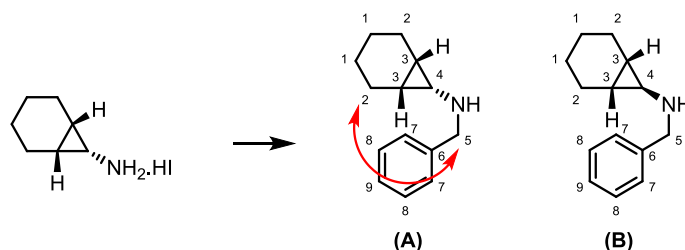

To a stirred solution of (1*R*\*,6*S*\*,7*S*\*)-bicyclo[4.1.0]heptan-7-amine hydroiodide (1.50 g, 6.3 mmol, 3:1 d.r.) in MeOH (14 mL) was added NaHCO<sub>3</sub> (2.11 g, 25.1 mmol) and benzaldehyde (0.58 mL, 5.65 mmol) before the reaction mixture was heated at reflux for 8 h. The reaction

mixture was cooled to 0 °C before NaBH<sub>4</sub> (285 mg, 7.52 mmol) was added portionwise. The reaction mixture was warmed to r.t. and stirred for 16 h. The reaction mixture was concentrated *in vacuo* before adding water (80 mL) and extracting with CH<sub>2</sub>Cl<sub>2</sub> (3 × 30 mL). The combined organics were dried over Na<sub>2</sub>SO<sub>4</sub>, and concentrated *in vacuo*. The residue was purified by column chromatography (30% EtOAc/hexane) to afford diastereomer **A** (807 mg, 71%) as a pale yellow oil, and diastereomer **B** (267 mg, 23%) as a pale yellow oil.

Data for product **A**:  $\nu_{\max}$  / cm<sup>-1</sup>: 3290 (br.), 2927 (s), 1642 (s), 1542 (m), 1495 (m), 1452 (m); <sup>1</sup>H NMR (CDCl<sub>3</sub>, 400 MHz):  $\delta$  7.40-7.21 (5H, m, 2 × C7-H, 2 × C8-H, C9-H), 3.81 (2H, s, C5-H<sub>2</sub>), 2.03 (1H, t, *J* = 7.5 Hz, C4-H), 1.85-1.73 (2H, m, 2 × C2-H), 1.59-1.49 (2H, m, 2 × C2-H), 1.47-1.31 (2H, m, 2 × C1-H), 1.30-1.17 (2H, m, 2 × C1-H), 0.86-0.83 (2H, m, 2 × C3-H); <sup>13</sup>C NMR (CDCl<sub>3</sub>, 100 MHz):  $\delta$  141.4 (C6), 128.4, 128.3, 126.9 (C7, C8, C9), 54.0 (C5), 36.4 (C4), 22.8 (C1), 18.5 (C2), 12.3 (C3); HRMS: (ESI<sup>+</sup>) Calculated for C<sub>14</sub>H<sub>20</sub>N: 202.1590. Found [M+H]<sup>+</sup>: 202.1596. *The relative stereochemistry of this compound was corroborated by nOe experiments (as indicated on the compound structure). An nOe was observed between C5-H<sub>2</sub> and C2-H<sub>2</sub>. No significant nOe was observed between C5-H<sub>2</sub> and C3-H.*

Data for product **B**:  $\nu_{\max}$  / cm<sup>-1</sup>: 2923 (s), 2850 (s), 1449 (s), 1295 (m); <sup>1</sup>H NMR (CDCl<sub>3</sub>, 400 MHz):  $\delta$  7.35-7.23 (5H, m, 2 × C7-H, 2 × C8-H, C9-H), 3.81 (2H, s, C5-H<sub>2</sub>), 1.89 – 1.80 (3H, m, 2 × C2-H, C4-H), 1.72 (1H, br. s, NH), 1.62-1.55 (2H, m, 2 × C2-H), 1.25-1.16 (2H, m, 2 × C1-H), 1.09-1.01 (2H, m, 2 × C2-H), 0.94-0.87 (2H, m, 2 × C3-H); <sup>13</sup>C NMR (CDCl<sub>3</sub>, 100 MHz):  $\delta$  140.7 (C6), 128.3, 128.3, 126.8 (C7, C8, C9), 53.6 (C5), 42.3 (C4), 23.0 (C2), 21.8 (C1), 18.8 (C3); HRMS: (ESI<sup>+</sup>) Calculated for C<sub>14</sub>H<sub>20</sub>N: 202.1590. Found [M + H]<sup>+</sup>: 202.1589.

### 1,3-Dibenzyl-1-((1*R*\*,6*S*\*,7*S*\*)-bicyclo[4.1.0]heptan-7-yl)urea (**5w**)

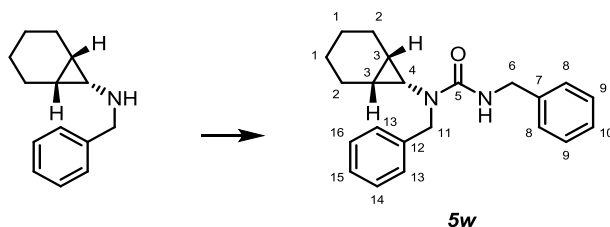

**General procedure A:** (1*R*\*,6*S*\*,7*S*\*)-*N*-Benzylbicyclo[4.1.0]heptan-7-amine (750 mg, 3.73 mmol) was employed and the residue was purified by column chromatography (15-20% EtOAc/hexane) to provide the title compound **5w** (1.16 g, 93%) as a colorless solid; m.p.: 105-107 °C (CH<sub>3</sub>Cl/hexane);  $\nu_{\max}$  / cm<sup>-1</sup>: 2924 (w), 1632 (s), 1504 (s), 1278 (m), 1231 (m); <sup>1</sup>H NMR (DMSO-d<sub>6</sub>, 500 MHz, 70 °C):  $\delta$  7.32-7.19 (10H, m, 2 × C8-H, 2 × C9-H, C10-H, 2 ×

C13-H, 2 × C14-H, 2 × C15-H), 6.63 (1H, m, NH), 4.53 (2H, br. s, C11-H<sub>2</sub>), 4.33 (2H, d, *J* = 5.9 Hz, C6-H<sub>2</sub>), 2.23 (1H, t, *J* = 7.4 Hz, C4-H), 1.82 (2H, m, 2 × C2-H), 1.56 (2H, m, 2 × C2-H), 1.30-1.17 (4H, m, C1-H), 1.10 (2H, m, C3-H); <sup>13</sup>C NMR (CDCl<sub>3</sub>, 100 MHz): δ 159.2 (C5), 140.2 (C7), 138.5 (C12), 127.6, 127.5, 127.3, 126.8, 126.2, 125.9 (C8, C9, C10, C13, C14, C15), 49.8 (C11), 43.5 (C6), 34.1 (C4), 20.7 (C1), 18.5 (C2), 13.9 (C3); HRMS: (ESI<sup>+</sup>) Calculated for C<sub>22</sub>H<sub>26</sub>N<sub>2</sub>NaO: 357.1937. Found [M + Na]<sup>+</sup>: 357.1937.

**2,4-Dibenzyl-4,6,7,8,9,9a-hexahydro-1H-benzo[e][1,3]diazepine-1,3(2H)-dione (8w)**

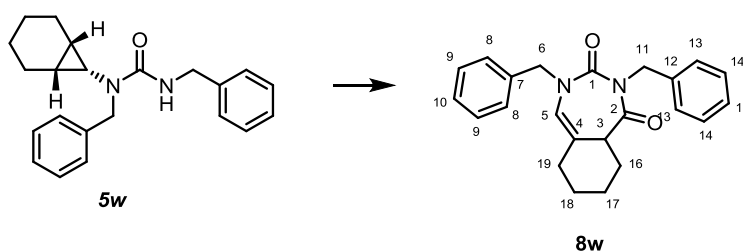

**General Procedure B:** Urea **5w** (50.2 mg, 0.15 mmol) and [Rh(cod)<sub>2</sub>]BARF (10.0 mol%) were employed and the reaction was stirred for 96 h at 90 °C. The crude mixture was purified by column chromatography (10% EtOAc/hexane) to yield the title compound **8w** (28.2 mg, 54%) as a colorless oil;  $\nu_{\text{max}}$  / cm<sup>-1</sup>: 2934 (w), 2863 (w), 1697 (s), 1645 (s), 1404 (s); <sup>1</sup>H NMR (CDCl<sub>3</sub>, 400 MHz): δ 7.33-7.24 (8H, m, 2 × C9-H, C10-H, 2 × C13-H, 2 × C14-H, C15-H), 7.07-7.05 (2H, m, C8-H), 5.82 (1H, s, C5-H), 5.24 (1H, d, *J* = 14.5 Hz, C11-H), 4.92-4.84 (2H, m, 1 × C6-H, 1 × C11-H), 4.59 (1H, d, *J* = 15.0 Hz, C6-H), 3.16 (1H, m, C3-H), 2.39 (1H, m, C16-H), 2.27 (1H, m, C18-H), 2.13 (1H, m, C16-H), 1.81-1.67 (3H, m, 1 × C17-H, C18-H, C19-H), 1.50 (1H, m, C19-H), 1.33 (1H, m, C17-H); <sup>13</sup>C NMR (CDCl<sub>3</sub>, 100 MHz): δ 171.7 (C2), 154.5 (C1), 138.0 (C12), 136.4 (C7), 128.8, 128.5, 128.4, 128.2, 127.7, 127.2 (C8, C9, C10, C13, C14, C15), 123.2 (C5), 52.8 (C6), 47.7 (C11), 41.2 (C3), 27.0 (C16), 23.1 (C17), 22.7 (C19), 22.1 (C18); HRMS: (ESI<sup>+</sup>) Calculated for C<sub>23</sub>H<sub>24</sub>N<sub>2</sub>NaO<sub>2</sub>: 383.1730. Found [M + Na]<sup>+</sup>: 383.1739.

**1-Benzyl-3-((1R\*,6S\*,7S\*)-bicyclo[4.1.0]heptan-7-yl)urea (*cis*-5x) and 1-Benzyl-3-((1R\*,6S\*,7S\*)-bicyclo[4.1.0]heptan-7-yl)urea (*trans*-5x)**

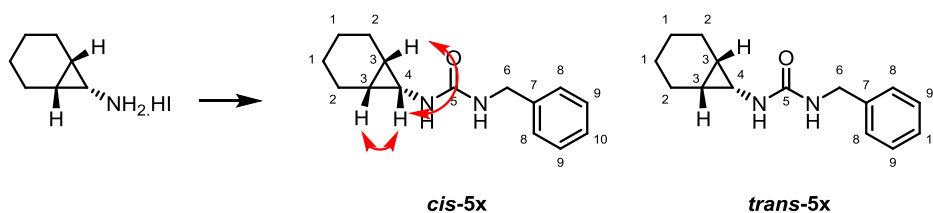

**General procedure A:** (1*R*\*,6*S*\*,7*S*\*)-Bicyclo[4.1.0]heptan-7-amine hydroiodide (480 mg, 3.73 mmol, 3:1 d.r.) was employed and the residue was purified by column chromatography (50% EtOAc/hexane) to provide the title compound *cis*-**5x** (378 mg, 77%, 4:1 d.r., *cis*-**5x**:*trans*-**5x**) as a colorless solid.

Data for the mixture of diastereomers:  $\nu_{\max}$  /  $\text{cm}^{-1}$ : 3316 (s), 2924 (s), 2850 (s), 1629 (s), 1565 (s), 1249 (s);  $m/z$  (ESI<sup>+</sup>) HRMS: Calculated for C<sub>15</sub>H<sub>21</sub>N<sub>2</sub>O: 245.1648. Found [M + H]<sup>+</sup>: 245.1646.

Data for major diastereomer *cis*-**5x**: <sup>1</sup>H NMR (CDCl<sub>3</sub>, 400 MHz):  $\delta$  7.36-7.25 (5H, m, 2  $\times$  C8-H, 2  $\times$  C9-H, C10-H), 5.23 (1H, br. s, NH), 4.47 (2H, d,  $J$  = 6.0 Hz, C6-H<sub>2</sub>) 2.33 (1H, t,  $J$  = 7.0 Hz, C4-H), 1.87 (2H, m, 2  $\times$  C2-H), 1.44-1.34 (2H, m, 2  $\times$  C2-H), 1.27-1.18 (4H, m, 4  $\times$  C1-H), 1.08-1.03 (2H, m, 2  $\times$  C3-H); <sup>13</sup>C NMR (CDCl<sub>3</sub>, 100 MHz):  $\delta$  159.3 (C5), 139.5 (C7), 128.7, 127.6, 127.3 (C8, C9, C10), 44.4 (C6), 29.0 (C4), 21.8 (C1), 18.0 (C2), 12.2 (C3). *The relative stereochemistry of this compound was corroborated by nOe experiments (as indicated on the compound structure). A strong nOe was observed between C4-H to C3-H.*

Data for minor diastereomer *trans*-**5x**: *Characteristic signals only*: <sup>1</sup>H NMR (CDCl<sub>3</sub>, 400 MHz):  $\delta$  5.05 (1H, br. s, NH), 4.66 (1H, br. s, NH), 2.11 (1H, m, C4-H), 1.66 – 1.58 (2H, m, 2  $\times$  C2-H); <sup>13</sup>C NMR (CDCl<sub>3</sub>, 100 MHz):  $\delta$  159.3 (C5), 139.6 (C7), 128.7, 127.2, (ArCH), 44.1 (C6), 34.0 (C4), 22.3 (C2), 21.3 (C1), 19.7 (C3).

**(5*aS*\*,9*aR*\*)-2-Benzyloctahydro-1*H*-benzo[*e*][1,3]diazepine-1,3(2*H*)-dione (9x) and 2-Benzyl-4,5,6,7,8,9-hexahydro-1*H*-benzo[*e*][1,3]diazepine-1,3(2*H*)-dione (8x)**

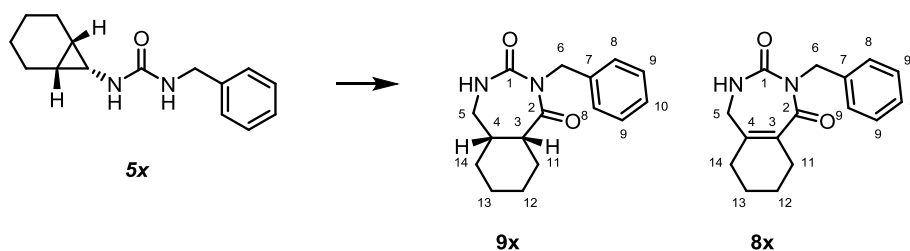

**General Procedure B:** Urea **5x** (36.7 mg, 0.15 mmol) and [Rh(cod)<sub>2</sub>]BARF (7.5 mol%) were employed and the reaction was stirred for 48 h at 110 °C. The crude mixture was purified by column chromatography (15-25% EtOAc/hexane) to yield the title compound **9x** (20.7 mg, 51%) as a pale brown oil and **8x** (6.8 mg, 17%) as a colorless oil. Analysis of the crude reaction mixture by <sup>1</sup>H NMR revealed a 3:1 (**9x**:**8x**) mixture of products.

Data for major product **9x**:  $\nu_{\max}$  /  $\text{cm}^{-1}$ : 3304 (m), 2929 (m), 1707 (s), 1536 (s), 1380 (s), 1247 (s);  $^1\text{H}$  NMR ( $\text{CDCl}_3$ , 500 MHz):  $\delta$  8.76 (1H, br. s,  $\text{NH}$ ), 7.35-7.24 (5H, m,  $2 \times \text{C8-H}$ ,  $2 \times \text{C9-H}$ ,  $\text{C10-H}$ ), 4.53 (1H, ddd,  $J = 15.0$  Hz, 5.5 Hz,  $1 \times \text{C6-H}$ ), 4.47 (1H, dd,  $J = 15.0$  Hz, 5.5 Hz,  $1 \times \text{C6-H}$ ), 3.67 (1H, dd,  $J = 11.0$  Hz, 6.0 Hz,  $1 \times \text{C5-H}$ ), 3.61 (1H, dd,  $J = 11.0$  Hz, 2.0 Hz,  $1 \times \text{C5-H}$ ), 2.69 (1H, td,  $J = 7.0$ , 4.0 Hz,  $\text{C3-H}$ ), 2.33 (1H, m,  $\text{C4-H}$ ), 2.04 (1H, m,  $1 \times \text{C14-H}$ ), 1.76 (1H, m,  $1 \times \text{C11-H}$ ), 1.64-1.50 (3H, m,  $1 \times \text{C12-H}$ ,  $1 \times \text{C13-H}$ ,  $1 \times \text{C14-H}$ ), 1.27-1.13 (3H, m,  $1 \times \text{C11-H}$ ,  $1 \times \text{C12-H}$ ,  $1 \times \text{C13-H}$ );  $^{13}\text{C}$  NMR ( $\text{CDCl}_3$ , 125 MHz):  $\delta$  178.1 (**C2**), 153.5 (**C1**), 138.2 (**C7**), 128.6, 127.6, 127.3 (**C8**, **C9**, **C10**), 49.3 (**C5**), 44.2 (**C3**), 43.8 (**C6**), 31.2 (**C4**), 27.7 (**C11**), 23.4 (**C12**), 22.9 (**C14**), 22.6 (**C13**); HRMS: ( $\text{ESI}^+$ ) Calculated for  $\text{C}_{16}\text{H}_{20}\text{N}_2\text{NaO}_2$ : 295.1417. Found  $[\text{M} + \text{Na}]^+$ : 295.1424.

Data for minor product **8x**:  $\nu_{\max}$  /  $\text{cm}^{-1}$ : 3298 (m), 2930 (m), 1699 (s), 1679 (m), 1537 (s), 1356 (s), 1250 (s);  $^1\text{H}$  NMR ( $\text{CDCl}_3$ , 500 MHz):  $\delta$  8.75 (1H, br. s,  $\text{NH}$ ), 7.35-7.22 (5H, m,  $2 \times \text{C8-H}$ ,  $2 \times \text{C9-H}$ ,  $\text{C10-H}$ ), 4.53 (2H, d,  $J = 6.0$  Hz,  $\text{C6-H}_2$ ), 4.26 (2H, s,  $\text{C5-H}_2$ ), 2.35-2.32 (2H, m,  $\text{C14-H}_2$ ), 2.21-2.17 (2H, m,  $\text{C11-H}_2$ ), 1.79-1.70 (4H, m,  $\text{C12-H}_3$ ,  $\text{C13-H}_3$ );  $^{13}\text{C}$  NMR ( $\text{CDCl}_3$ , 125 MHz):  $\delta$  172.2 (**C2**), 154.8 (**C4**), 152.7 (**C1**), 138.5 (**C7**), 131.3 (**C3**), 128.6, 127.5, 127.2 (**C8**, **C9**, **C10**), 51.5 (**C5**), 43.6 (**C6**), 24.4 (**C14**), 21.7, 21.5 (**C12**, **C13**), 19.8 (**C11**); HRMS: ( $\text{ESI}^+$ ) Calculated for  $\text{C}_{16}\text{H}_{18}\text{N}_2\text{NaO}_2$ : 293.1260. Found  $[\text{M} + \text{Na}]^+$ : 293.1264.

**1,3-Dibenzyl-1-(2-methylprop-1-en-1-yl)urea (**11b**) and 1,3-Dibenzyl-1-(2-methylallyl)urea (**11b'**)**

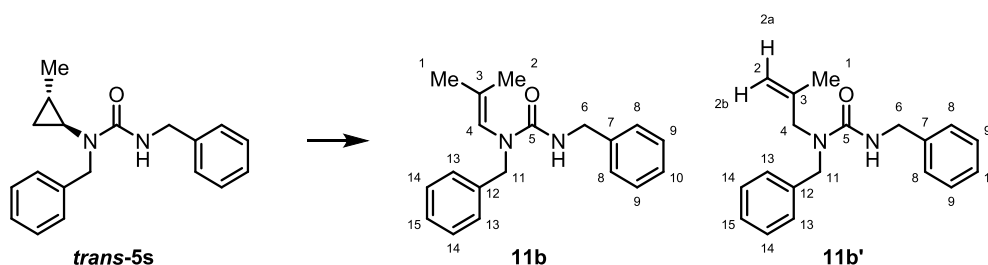

To a resealable tube containing  $[\text{Rh}(\text{cod})_2]\text{BF}_4$  (4.00 mg, 0.01 mmol) and  $\text{PPh}_3$  (7.90 mg, 0.03 mmol) under an atmosphere of argon was added urea **trans-5s** (58.9 mg, 0.20 mmol) in anhydrous toluene (2 mL). The tube was sealed and heated at 100 °C and stirred for 2 h. The mixture was cooled to r.t. and concentrated *in vacuo*. The crude mixture was purified by column chromatography (25% EtOAc/hexane) to yield the title compounds **11b** and **11b'** (50.7 mg, 86%, 2:1, **11b**:**11b'**) as a colorless oil. The isomers could not be separated by silica gel column chromatography. Analysis of the crude reaction mixture by  $^1\text{H}$  NMR revealed a 2:1 (**11b**:**11b'**) mixture of products.

Data for the mixture of compounds:  $\nu_{\max}$  /  $\text{cm}^{-1}$ : 3355 (m), 1643 (s), 1510 (s), 1496 (s), 1434 (m), 1264 (s); HRMS: (ESI<sup>+</sup>) Calculated for C<sub>19</sub>H<sub>23</sub>N<sub>2</sub>O: 295.1805. Found [M + H]<sup>+</sup>: 295.1804.

Data for compound **11b**: <sup>1</sup>H NMR (CDCl<sub>3</sub>, 400 MHz):  $\delta$  7.37-7.23 (10H, m, 2 × C8-H, 2 × C9-H, C10-H, 2 × C13-H, 2 × C14-H, C15-H), 5.67 (1H, s, C4-H), 5.11 (1H, t,  $J$  = 6.0 Hz, NH), 4.62 (2H, s, C11-H<sub>2</sub>), 4.47 (2H, d,  $J$  = 6.0 Hz, C6-H<sub>2</sub>), 1.66 (3H, s, C1/2-H<sub>3</sub>), 1.50 (3H, s, C1/2-H<sub>3</sub>); <sup>13</sup>C NMR (CDCl<sub>3</sub>, 100 MHz):  $\delta$  157.0 (C5), 139.8 (C7), 138.4 (C12), 137.9 (C3), 128.6, 128.5, 128.3, 127.5, 127.4, 127.0 (C8, C9, C10, C13, C14, C15), 122.3 (C4), 51.1 (C11), 44.8 (C6), 21.9, 17.6 (C1, C2).

Data for compound **11b'**: <sup>1</sup>H NMR (CDCl<sub>3</sub>, 400 MHz):  $\delta$  7.37-7.23 (10H, m, 2 × C8-H, 2 × C9-H, C10-H, 2 × C13-H, 2 × C14-H, C15-H), 4.92 (1H, s, C2-H), 4.89 (1H, s, C2-H), 4.86 (1H, br. s, NH), 4.54 (2H, s, C11-H<sub>2</sub>), 4.46 (2H, d,  $J$  = 6.0 Hz, C6-H<sub>2</sub>), 3.79 (2H, s, C4-H<sub>2</sub>), 1.70 (3H, s, C1-H<sub>3</sub>); <sup>13</sup>C NMR (CDCl<sub>3</sub>, 100 MHz):  $\delta$  158.5 (C5), 141.3 (C3), 139.6 (C7), 138.0 (C12), 128.7, 128.5, 128.4, 127.5, 127.3, 127.1 (C8, C9, C10, C13, C14, C15), 111.9 (C1), 52.7 (C4), 50.4 (C11), 44.9 (C6), 19.9 (C1).

**(1*S*\*,2*R*\*)-1,3-Dibenzyl-1-(2-methylcyclopropyl)urea (*cis*-5s)**

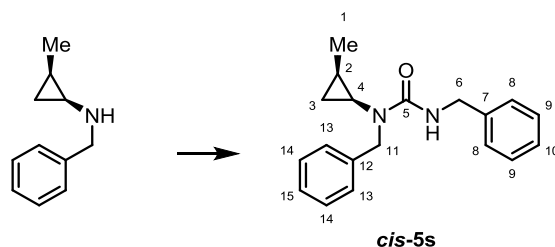

**General procedure A:** (1*S*\*,2*R*\*)-*N*-Benzyl-2-methylcyclopropan-1-amine<sup>5</sup> (484 mg, 3.00 mmol) and benzyl isocyanate (371  $\mu\text{L}$ , 3.00 mmol) were employed. The crude mixture was purified by column chromatography (30% EtOAc/hexane) to yield the title compound ***cis*-5s** (744 mg, 84%) as a colorless oil;  $\nu_{\max}$  /  $\text{cm}^{-1}$ : 3326 (m), 2969 (s), 1639 (s), 1511 (s), 1453 (s), 1229 (m), 1056 (m); <sup>1</sup>H NMR (CDCl<sub>3</sub>, 400 MHz):  $\delta$  7.37-7.23 (10H, m, 2 × C8-H, 2 × C9-H, C10-H, 2 × C13-H, 2 × C14-H, C15-H), 5.53 (1H, t,  $J$  = 5.5 Hz, NH), 4.88 (1H, d,  $J$  = 15.0 Hz, 1 × C11-H), 4.58-4.46 (2H, m, C6-H<sub>2</sub>), 4.33 (1H, d,  $J$  = 15.0 Hz, 1 × C11-H), 2.37 (1H, ddd,  $J$  = 8.0, 6.0, 4.5 Hz, C4-H), 1.09-0.96 (4H, m, C1-H<sub>3</sub>, C2-H), 0.89 (1H, m, 1 × C3-H), 0.40 (1H, m, 1 × C3-H); <sup>13</sup>C NMR (CDCl<sub>3</sub>, 100 MHz):  $\delta$  159.5 (C5), 139.6 (C7), 139.0 (C11), 128.6, 128.4, 128.2, 127.7, 127.2, 126.9 (C8, C9, C10, C13, C14, C15), 51.7 (C11), 45.0 (C6), 32.6 (C4), 14.7 (C2), 13.6 (C3), 12.7 (C1); HRMS: (ESI<sup>+</sup>) Calculated for C<sub>19</sub>H<sub>22</sub>N<sub>2</sub>NaO: 317.1624.

Found  $[M + Na]^+$ : 317.1613. The relative stereochemistry was assigned as the opposite diastereomer of *trans*-5s.

**(E)-1,3-Dibenzyl-1-(but-1-en-1-yl)urea (11a) and 1,3-Dibenzyl-1-(2-methylprop-1-en-1-yl)urea (11b)**

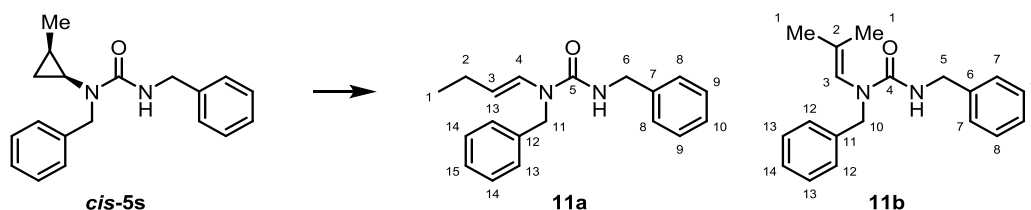

To a resealable tube containing  $[Rh(cod)_2]BF_4$  (4.00 mg, 0.01 mmol) and  $PPh_3$  (7.90 mg, 0.03 mmol) under an atmosphere of argon was added urea *cis*-5s (58.9 mg, 0.20 mmol) in anhydrous toluene (2 mL). The tube was sealed and heated at 100 °C and stirred for 2 h. The mixture was cooled to r.t. and concentrated *in vacuo*. The crude mixture was purified by column chromatography (25% EtOAc/hexane) to yield the title compound **11a** (21.8 mg, 37%) as a colorless oil. Analysis of the crude reaction mixture by  $^1H$  NMR revealed an 11:1 (**11a**:**11b**) mixture of products.

Data for compound **11a**:  $\nu_{max}$  /  $cm^{-1}$ : 3322 (s), 1628 (s), 1531 (s), 1452 (s), 1248 (s);  $^1H$  NMR ( $CDCl_3$ , 400 MHz):  $\delta$  7.35-7.21 (10H, m,  $2 \times C8-H$ ,  $2 \times C9-H$ ,  $C10-H$ ,  $2 \times C13-H$ ,  $2 \times C14-H$ ,  $C15-H$ ), 6.81 (1H, d,  $J = 14.0$  Hz,  $C4-H$ ), 5.03-4.93 (2H, m,  $C3-H$ ,  $NH$ ), 4.73 (2H, s,  $C11-H_2$ ), 4.44 (2H, d,  $J = 5.5$  Hz,  $C6-H_2$ ), 2.02 (2H, dq,  $J = 7.0, 7.0$  Hz,  $C2-H_2$ ), 0.95 (3H, t,  $J = 7.0$  Hz,  $C1-H_3$ );  $^{13}C$  NMR ( $CDCl_3$ , 100 MHz):  $\delta$  156.0 (**C5**), 139.1 (**C7**), 137.3 (**C12**), 128.7, 128.6, 127.5, 127.3, 127.2, 126.8, 126.5 (**C4**, **C8**, **C9**, **C10**, **C13**, **C14**, **C15**), 114.8 (**C3**), 48.7 (**C11**), 44.9 (**C6**), 23.5 (**C2**), 14.7 (**C1**); HRMS: (ESI $^+$ ) Calculated for  $C_{19}H_{23}N_2O$ : 295.1805. Found  $[M + H]^+$ : 295.1808.

Data for compound **11b**: Full characterization data for compound **11b** is presented on S47-S48.

**1,3-Dibenzyl-5-methyl-3,6-dihydro-1H-1,3-diazepine-2,7-dione (8s') and 1,3-Dibenzyl-6-methyl-3,6-dihydro-1H-1,3-diazepine-2,7-dione (8s)**



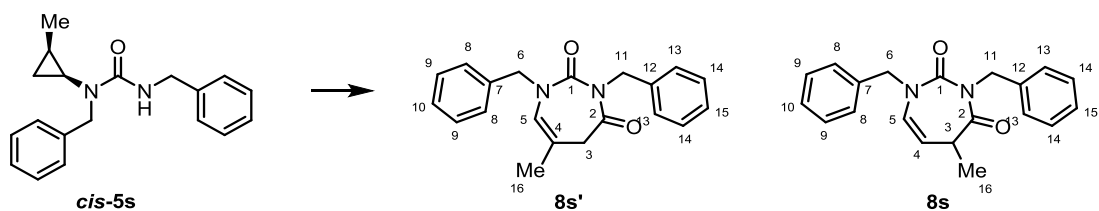

**General Procedure B:** Urea *cis*-**5s** (44.2 mg, 0.15 mmol) and [Rh(cod)<sub>2</sub>]BARF (7.5 mol%) were employed and the reaction was stirred for 72 h at 100 °C. The crude mixture was purified by column chromatography (25% EtOAc/hexane) to yield the title compound **8s'** (32.6 mg, 68%) as a pale yellow oil. Analysis of the crude reaction mixture by <sup>1</sup>H NMR revealed a 5:1 (**8s'**:**8s**) mixture of products.

Data for major regioisomer **8s'**:  $\nu_{\max}$  / cm<sup>-1</sup>: 2971 (s), 1698 (s), 1646 (s), 1408 (s), 1214 (s); <sup>1</sup>H NMR (CDCl<sub>3</sub>, 400 MHz):  $\delta$  7.35-7.21 (8H, m, 2 × C9-H, C10-H, 2 × C13-H, 2 × C14-H, C15-H), 7.08-7.04 (2H, m, 2 × C8-H), 5.78 (1H, q,  $J$  = 1.5 Hz, C5-H), 5.04 (2H, s, C11-H<sub>2</sub>), 4.71 (2H, s, C6-H<sub>2</sub>), 3.04 (2H, s, C3-H<sub>2</sub>), 1.86 (3H, s, C16-H<sub>3</sub>); <sup>13</sup>C NMR (CDCl<sub>3</sub>, 100 MHz):  $\delta$  169.2 (C2), 154.1 (C1), 137.6 (C12), 136.3 (C7), 128.7, 128.4, 128.1, 127.7, 127.6, 127.2 (C8, C9, C10, C13, C14, C15), 124.5 (C5), 124.0 (C4), 52.9 (C6), 47.6 (C11), 40.8 (C3), 19.6 (C16); HRMS: (ESI<sup>+</sup>) Calculated for C<sub>20</sub>H<sub>20</sub>N<sub>2</sub>NaO<sub>2</sub>: 343.1417. Found [M + Na]<sup>+</sup>: 343.1408.

Data for minor regioisomer **8s**: Full characterization data for compound **8s** is presented on S30-S31.

### 3-Benzyl-6-butyl-1,3-diazepane-2,4-dione (deutero-9v') and 3-Benzyl-5-butyl-1,3-diazepane-2,4-dione (9v)

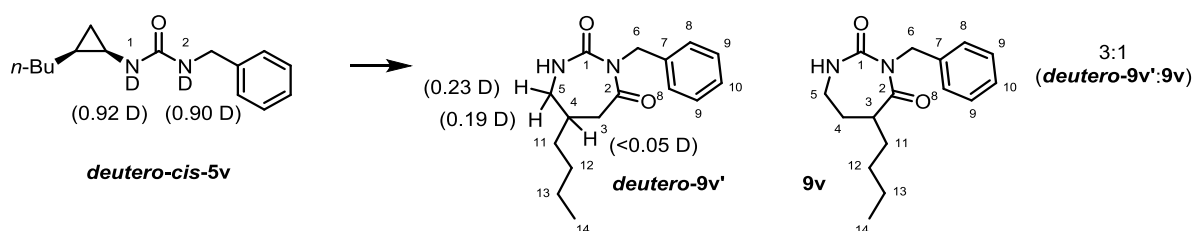

*Deutero-cis-5v* was initially prepared by repeatedly dissolving *cis-5v* in MeOD-d<sub>4</sub> and concentrating the resulting solution *in-vacuo*. 92% deuterium incorporation at N1 and 90% deuterium incorporation at N2 was measured by <sup>1</sup>H NMR.

Data for *deutero-cis-5v*: <sup>1</sup>H NMR (CDCl<sub>3</sub>, 500 MHz):  $\delta$  7.31-7.22 (5H, m, 2 × C11-H, 2 × C12-H, C13-H), 5.44 (0.08H, br. s, NH), 4.92 (0.10H, br. s, NH), 4.40 (2H, d,  $J$  = 6.0 Hz, C9-

$\underline{\text{H}}_2$ ), 2.45 (1H, m,  $\text{C7-}\underline{\text{H}}$ ), 1.45 (1H, m,  $1 \times \text{C4-}\underline{\text{H}}$ ), 1.37-1.28 (4H, m,  $\text{C2-}\underline{\text{H}}_2$ ,  $\text{C3-}\underline{\text{H}}_2$ ), 1.19 (1H, m,  $1 \times \text{C4-}\underline{\text{H}}$ ), 0.89-0.84 (4H, m,  $\text{C1-}\underline{\text{H}}_3$ ,  $1 \times \text{C6-}\underline{\text{H}}$ ), 0.13 (1H, m,  $1 \times \text{C6-}\underline{\text{H}}$ ).  $\text{CDCl}_3$  was base filtered ( $\text{K}_2\text{CO}_3$  plug) prior to use.

**General Procedure B:** Urea *deutero-cis-5v* (37.0 mg, 0.150 mmol) and  $[\text{Rh}(\text{cod})_2]\text{BARF}$  (7.5 mol%) were employed and the reaction was stirred for 43 h at 90 °C. The crude mixture was purified by column chromatography (20% EtOAc/hexane) to yield the title compound *deutero-9v'* (19.2 mg, 47%) as a yellow oil. Analysis of the product revealed 23% and 16% deuterium incorporation at the diastereotopic  $\text{C5}$  positions. <5% deuterium incorporation was measured at  $\text{C4}$ . *9v* could not be isolated in a pure form and therefor deuterium incorporation could not be confirmed.

Data for product *deutero-9v'*:  $^1\text{H}$  NMR ( $\text{CDCl}_3$ , 400 MHz):  $\delta$  8.75 (1H, br. s,  $\text{NH}$ ), 7.39-7.20 (5H, m,  $2 \times \text{C8-}\underline{\text{H}}$ ,  $2 \times \text{C9-}\underline{\text{H}}$ ,  $\text{C10-}\underline{\text{H}}$ ), 4.50 (2H, d,  $J = 6.0$  Hz,  $\text{C6-}\underline{\text{H}}_2$ ), 4.04 (0.81H, dd,  $J = 11.0$ , 7.5 Hz,  $1 \times \text{C5-}\underline{\text{H}}$ ), 3.44 (0.77H, dd,  $J = 11.0$ , 7.0 Hz,  $1 \times \text{C5-}\underline{\text{H}}$ ), 2.69 (1H, m,  $1 \times \text{C3-}\underline{\text{H}}$ ), 2.35-2.26 (1.96H, m,  $1 \times \text{C3-}\underline{\text{H}}$ ,  $\text{C4-}\underline{\text{H}}$ ), 1.52-1.26 (6H, m,  $\text{C11-}\underline{\text{H}}_2$ ,  $\text{C12-}\underline{\text{H}}_2$ ,  $\text{C13-}\underline{\text{H}}_2$ ), 0.91 (3H, t,  $J = 7.0$  Hz,  $\text{C14-}\underline{\text{H}}_3$ ).  $^2\text{H}$  NMR ( $\text{CHCl}_3$ , 500 MHz):  $\delta$  8.74 (0.34 D, br. s,  $\text{ND}$ ), 4.05 (0.71D, br. s,  $1 \times \text{C5-}\underline{\text{D}}$ ), 3.44 (1D, br. s,  $1 \times \text{C5-}\underline{\text{D}}$ ), 2.28 (0.04D, br. m,  $\text{C4-}\underline{\text{D}}$ ).

Data for minor compound *9v*: Partial characterization data for compound *9v* is presented on S34-35.

### 3-Benzyl-1,3-diazepane-2,4-dione (*deutero-9l*) and 1-Benzyl-3,6-dihydro-1H-1,3-diazepine-2,7-dione (*8l*)

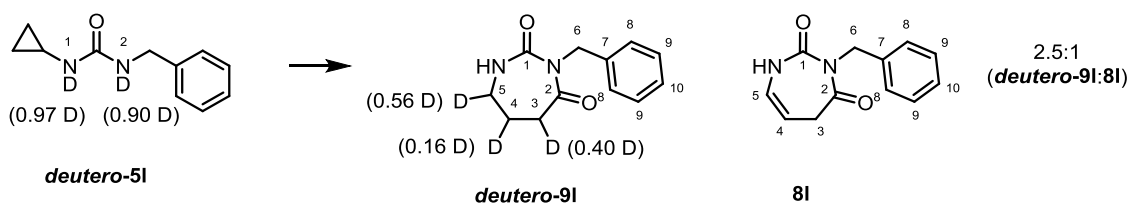

*Deutero-5l* was initially prepared by repeatedly dissolving *5l* in  $\text{MeOD-d}_4$  and concentrating the resulting solution *in-vacuo*. 97% deuterium incorporation at  $\text{N1}$  and 90% deuterium incorporation at  $\text{N2}$  was measured by  $^1\text{H}$  NMR.

Data for *deutero-5l*:  $^1\text{H}$  NMR ( $\text{CDCl}_3$ , 400 MHz):  $\delta$  7.37-7.25 ( $2 \times \text{C6-}\underline{\text{H}}$ ,  $2 \times \text{C7-}\underline{\text{H}}$ ,  $\text{C8-}\underline{\text{H}}$ ), 5.31 (0.03H, br. s,  $\text{NH}$ ), 4.79 (0.10H, br. s,  $\text{NH}$ ), 4.47 (2H, d,  $J = 6.0$  Hz,  $\text{C4-}\underline{\text{H}}_2$ ), 2.46 (1H, tt,

$J = 7.0, 3.5$  Hz, C2-H), 0.76-0.71 (2H, m,  $2 \times$  C1-H), 0.60-0.57 (2H, m,  $2 \times$  C1-H).  $CDCl_3$  was base filtered ( $K_2CO_3$  plug) prior to use.

**General Procedure B:** Urea **deutero-5l** (28.5 mg, 0.150 mmol) and  $[Rh(cod)_2]BARF$  (5.0 mol%) were employed and the reaction was stirred for 24 h at 90 °C. The crude mixture was purified by column chromatography (30% EtOAc/hexane) to yield the title compound (20.5 mg, 63%, 2.5:1, **deutero-9l:8l**) as a yellow oil. Analysis of the product revealed 56% deuterium incorporation at C5, 16% at C4 and 40% at C3. No deuterium incorporation was observed in **8l**.

Data for product **deutero-9l**:  $^1H$  NMR ( $CDCl_3$ , 400 MHz):  $\delta$  8.79 (1H, br. s, NH), 7.35-7.21 (5H, m,  $2 \times$  C8-H,  $2 \times$  C9-H, C10-H), 4.50 (2H, d,  $J = 6.0$  Hz, C6-H<sub>2</sub>), 3.89 (1.44H, t,  $J = 7.0$  Hz, C5-H<sub>2</sub>), 2.61 (1.60H, t,  $J = 7.0$  Hz, C3-H<sub>2</sub>), 2.04 (1.84H, tt,  $J = 7.0, 7.0$  Hz, C4-H<sub>2</sub>);  $^2H$  NMR ( $CHCl_3$ , 500 MHz):  $\delta$  3.89 (0.56D, br. s, C5-D), 2.60 (0.49D, br. s, C3-D), 2.02 (0.06D, br. s, C4-D).

Data for minor compound **8l**: Full characterization data for compound **8l** is presented on S34-35.

#### Procedure for the one-step urea formation/carbonylative cyclization sequence

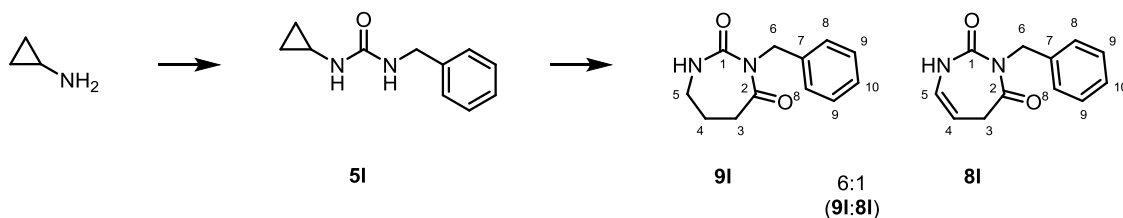

To a flame-dried flask, fitted with a magnetic stirrer under an atmosphere of nitrogen, was charged cyclopropylamine (0.069 mL, 1.0 mmol) and argon sparged 1,2-DCB (5 mL, 0.2 M) followed by benzyl isocyanate (0.124 mL, 1.00 mmol). The reaction mixture was heated to 80 °C to allow complete solvation of intermediate urea **5l**. Meanwhile, an oven dried reaction tube, fitted with a magnetic stirrer, was charged with  $[Rh(cod)_2]BARF$  (8.87 mg, 0.0075 mmol), and  $PPh_3$  (3.93 mg, 0.015 mmol). The reaction tube was fitted with a rubber septum and purged with argon before the addition of the urea solution (0.75 mL, 0.015 mmol) by syringe. The resulting mixture was stirred for *ca.* 5 minutes at r.t.. The reaction tube was purged with CO and the reaction mixture was sparged with CO for 10 seconds before being heated to 100 °C for 24 h. The mixture was cooled to r.t., concentrated *in vacuo* and purified by flash column

chromatography (40% EtOAc/hexane) to yield the title compounds (18.7 mg, 57%, 6:1, **91:81**) as a yellow oil.

## Selected Reaction Optimization Tables:

### Initial optimization of parent substrate 5a;

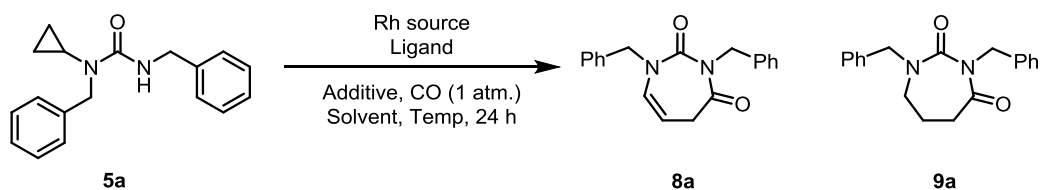

| Entry | Rh source                                 | Ligand <sup>a</sup>                                                   | Solvent             | Additive                          | T      | Yield <sup>b</sup> | 8a:9a |
|-------|-------------------------------------------|-----------------------------------------------------------------------|---------------------|-----------------------------------|--------|--------------------|-------|
| 1     | [Rh(cod <sub>2</sub> )]OTf<br>(7.5 mol%)  | P(3,4,5-(F) <sub>3</sub> C <sub>6</sub> H <sub>2</sub> ) <sub>3</sub> | 1,2-DCB<br>(0.15 M) | -                                 | 130 °C | 57%                | 4:1   |
| 2     | [Rh(cod)Cl] <sub>2</sub><br>(3.75 mol%)   | P(3,4,5-(F) <sub>3</sub> C <sub>6</sub> H <sub>2</sub> ) <sub>3</sub> | 1,2-DCB<br>(0.15 M) | -                                 | 130 °C | 16%                | 3:1   |
| 3     | [Rh(cod <sub>2</sub> )]OTf<br>(7.5 mol%)  | PPh <sub>3</sub>                                                      | 1,2-DCB<br>(0.15 M) | -                                 | 115 °C | 70%                | 9:1   |
| 4     | [Rh(cod <sub>2</sub> )]OTf<br>(7.5 mol%)  | PPh <sub>3</sub>                                                      | 1,2-DCB<br>(0.15 M) | -                                 | 100 °C | 65%                | 27:1  |
| 5     | [Rh(cod <sub>2</sub> )]OTf<br>(7.5 mol%)  | PPh <sub>3</sub>                                                      | 1,2-DCB<br>(0.15 M) | PhCO <sub>2</sub> H<br>(100 mol%) | 100 °C | 77%                | 13:1  |
| 6     | [Rh(cod <sub>2</sub> )]OTf<br>(7.5 mol%)  | PPh <sub>3</sub>                                                      | 1,2-DCB<br>(0.15 M) | PhCO <sub>2</sub> H<br>(10 mol%)  | 100 °C | 76%                | 19:1  |
| 7     | [Rh(cod <sub>2</sub> )]OTf<br>(2.5 mol%)  | PPh <sub>3</sub>                                                      | 1,2-DCB<br>(0.2 M)  | PhCO <sub>2</sub> H<br>(10 mol%)  | 100 °C | 76% <sup>c</sup>   | 19:1  |
| 8     | [Rh(cod <sub>2</sub> )]BARF<br>(3.5 mol%) | PPh <sub>3</sub>                                                      | 1,2-DCB<br>(0.2 M)  | PhCO <sub>2</sub> H<br>(15 mol%)  | 100 °C | 82% <sup>c</sup>   | 20:1  |

<sup>a</sup>2 eq. of ligand were employed relative to Rh loading. <sup>b</sup>*In-situ* yields are quoted. <sup>c</sup>Isolated yield.

### Optimization of “challenging” substrate 5d;

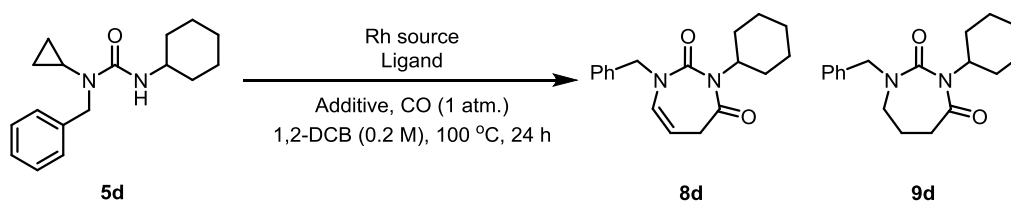

| Entry    | Rh source                                 | Ligand <sup>a</sup> | Additive                      | time | Yield <sup>b</sup> | 8d:9d |
|----------|-------------------------------------------|---------------------|-------------------------------|------|--------------------|-------|
| <b>1</b> | [Rh(cod <sub>2</sub> )]OTf<br>(2.5 mol%)  | PPh <sub>3</sub>    | PhCO <sub>2</sub> H (10 mol%) | 24 h | 23%                | >15:1 |
| <b>2</b> | [Rh(cod <sub>2</sub> )]OTf<br>(7.5 mol%)  | PPh <sub>3</sub>    | PhCO <sub>2</sub> H (10 mol%) | 24 h | 45%                | 19:1  |
| <b>3</b> | [Rh(cod <sub>2</sub> )]BARF<br>(3.5 mol%) | PPh <sub>3</sub>    | PhCO <sub>2</sub> H (10 mol%) | 24 h | 44%                | 17:1  |
| <b>4</b> | [Rh(cod <sub>2</sub> )]BARF<br>(7.5 mol%) | PPh <sub>3</sub>    | PhCO <sub>2</sub> H (10 mol%) | 24 h | 53%                | 20:1  |
| <b>5</b> | [Rh(cod <sub>2</sub> )]BARF<br>(7.5 mol%) | PPh <sub>3</sub>    | PhCO <sub>2</sub> H (10 mol%) | 48 h | 62%                | 18:1  |
| <b>6</b> | [Rh(cod <sub>2</sub> )]BARF<br>(7.5 mol%) | PPh <sub>3</sub>    | PhCO <sub>2</sub> H (15 mol%) | 72 h | 69% <sup>c</sup>   | 23:1  |

<sup>a</sup>2 eq. of ligand were employed relative to Rh loading. <sup>b</sup>*In-situ* yields are quoted. <sup>c</sup>Isolated yield.

**The effect of hydrogen scavengers on saturated/unsaturated product ratios;**

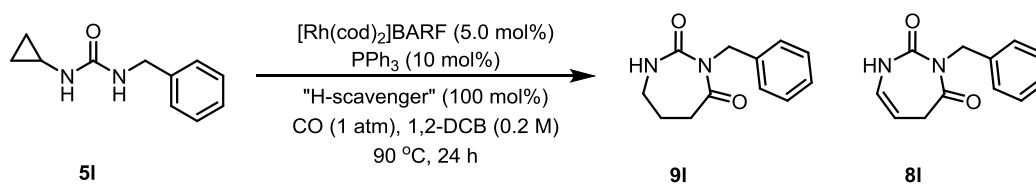

| Entry | "H-Scavenger"     | Yield <sup>a</sup> | Product ratio (9I:8I) <sup>c</sup> |
|-------|-------------------|--------------------|------------------------------------|
| 1     | No Additive       | 62% <sup>b</sup>   | 4:1                                |
| 2     | Diphenylacetylene | 28%                | 2:1                                |
| 3     | Norbornene        | 39%                | 1:1.5                              |

<sup>a</sup>*In-situ* yields are quoted. <sup>b</sup>Isolated yield. <sup>c</sup>Product ratios were determined by <sup>1</sup>H NMR analysis against an internal standard.

*The presence of hydrogen scavengers was found to alter the reaction selectivity towards the unsaturated product (8I).*

## Further Oxidative Insertion Regioselectivity Experiments

(A) Rhodacycle derived from *trans*-substituted cyclopropyl carbamate. Preferential insertion into bond a in the presence of CO ligands.<sup>5</sup>

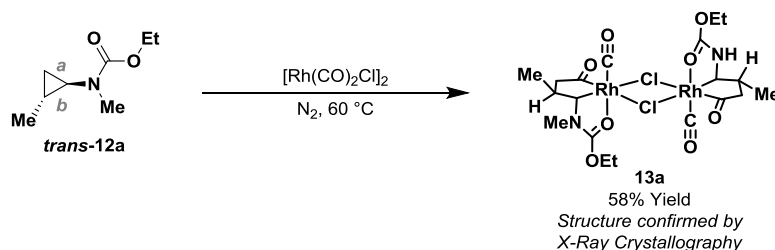

(B) Rhodacycle derived from *cis*-substituted cyclopropyl carbamate. Preferential insertion into bond b in the presence of CO ligands.<sup>8</sup>

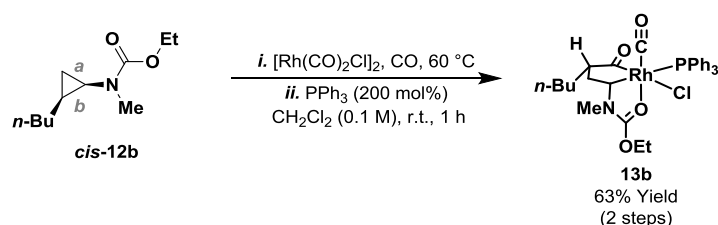

(C)  $\beta$ -Hydride elimination experiment on *trans*-substituted cyclopropyl carbamate. Preferential insertion into bond a in the absence of CO ligands (procedures and data are given below).

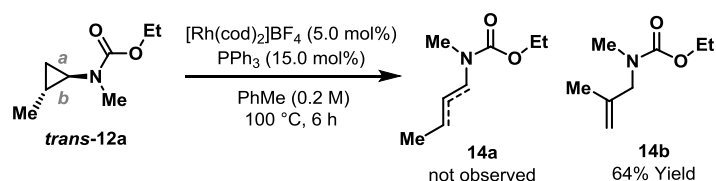

(D)  $\beta$ -Hydride elimination experiment on *cis*-substituted cyclopropyl carbamate. Preferential insertion into bond b in the absence of CO ligands (procedures and data are given below).

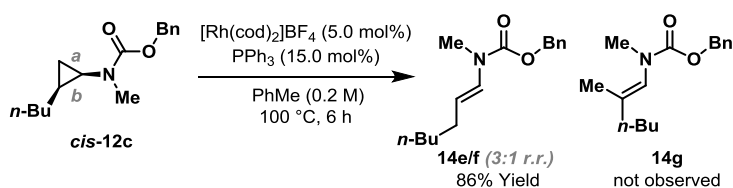



**Ethyl methyl(2-methylprop-1-en-1-yl)carbamate (14b), Ethyl methyl(2-methylallyl)carbamate (14c) and Ethyl methylcarbamate (14d)**

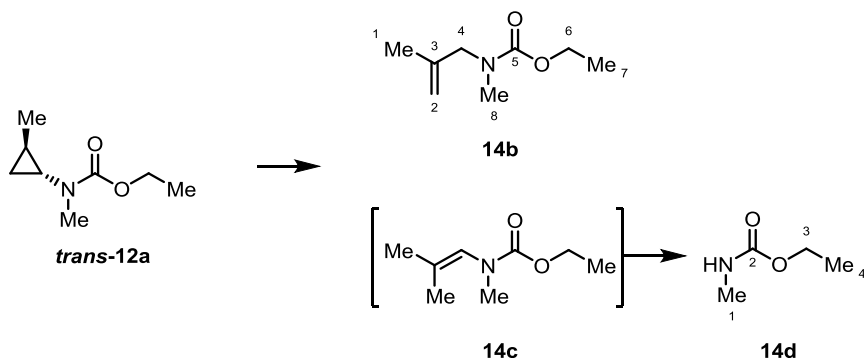

An oven dried reaction tube, fitted with a magnetic stirrer, was charged with  $[\text{Rh}(\text{cod})_2]\text{BF}_4$  (3.1 mg, 0.0075 mmol) and  $\text{PPh}_3$  (5.9 mg, 0.0225 mmol). The tube was fitted with a rubber septum and purged with argon. **trans-12a**<sup>5</sup> (23.6 mg, 0.15 mmol, single diastereomer) in argon sparged anhydrous toluene (0.75 mL) was added *via* syringe before aging the catalyst for *ca.* 5 minutes. The reaction was heated at 100 °C with stirring for 6 h. The mixture was cooled to r.t., concentrated *in vacuo* and purified by column chromatography (5% EtOAc/hexane) to yield the title compounds (15.1 mg, 64%, 5:1, **14b**:**14d**) as a colorless oil. *The presence of 14d is attributed to hydrolysis of enamine 14c under the reaction conditions. No linear  $\beta$ -hydride elimination products resulting from insertion into bond b were observed by NMR analysis of the crude reaction mixture.*

Data for the mixture of compounds:  $\nu_{\text{max}} / \text{cm}^{-1}$ : 2978 (w), 1698 (s), 1447 (m), 1382 (m), 1147 (s); HRMS: (ESI<sup>+</sup>) Calculated for  $\text{C}_8\text{H}_{15}\text{NNaO}_2$ : 180.1000. Found  $[\text{M} + \text{Na}]^+$ : 180.0988.

Data for major compound **14b**:  $^1\text{H}$  NMR ( $\text{CDCl}_3$ , 400 MHz):  $\delta$  4.86 (1H, br. s, C2-H), 4.77 (1H, br. s, C2-H), 4.14 (2H, q,  $J = 7.0$  Hz, C6-H<sub>2</sub>), 3.80 (2H, m, C4-H<sub>2</sub>), 2.82 (3H, m, C8-H<sub>3</sub>), 1.67 (3H, s, C1-H<sub>3</sub>), 1.26 (3H, m, C7-H<sub>3</sub>);  $^{13}\text{C}$  NMR ( $\text{CDCl}_3$ , 100 MHz):  $\delta$  111.9 (C2), 61.4 (C6), 54.7 (C4), 33.3 (C8), 19.9 (C1), 14.9 (C7).

Data for major compound **14d**: *Characteristic signals only*:  $^1\text{H}$  NMR ( $\text{CDCl}_3$ , 400 MHz):  $\delta$  2.98 (3H, s, C1-H<sub>3</sub>). *Proton signals corresponding to C3 and C4 closely overlap C6 and C7 of compound 14b.*

### Benzyl ((1*R*\*,2*S*\*)-2-butylcyclopropyl)carbamate

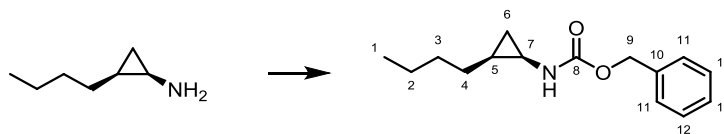

To a stirring solution of (1*R*\*,2*S*\*)-2-butylcyclopropan-1-amine<sup>8</sup> (100 mg, 0.88 mmol) and NEt<sub>3</sub> (0.15 mL, 1.06 mmol) in CH<sub>2</sub>Cl<sub>2</sub> (4.4 mL) was added benzyl chloroformate (150  $\mu$ L, 1.06 mmol) dropwise at 0 °C over 10 minutes under an atmosphere of nitrogen. The mixture was warmed to r.t. and stirred overnight. The mixture was diluted with water (10 mL) and extracted with CH<sub>2</sub>Cl<sub>2</sub> (3  $\times$  10 mL). The organic extracts were combined, washed with brine (10 mL), dried over Na<sub>2</sub>SO<sub>4</sub> and concentrated *in vacuo*. The crude mixture was purified by column chromatography (20% EtOAc/hexane) to yield the title compound (145 mg, 67%) as a colorless oil;  $\nu_{\text{max}}$  / cm<sup>-1</sup>: 3324 (m), 1700 (s), 1525 (s), 1453 (m), 1259 (s), 1075 (s); <sup>1</sup>H NMR (CDCl<sub>3</sub>, 400 MHz):  $\delta$  7.36-7.27 (5H, m, 2  $\times$  C11-H, 2  $\times$  C12-H, C13-H), 5.16-5.09 (2H, m, C9-H<sub>2</sub>), 4.73 (1H, m, NH), 2.69 (1H, m, C7-H), 1.49-1.18 (6H, m, C2-H<sub>2</sub>, C3-H<sub>2</sub>, C4-H<sub>2</sub>), 0.98-0.83 (5H, m, C1-H<sub>3</sub>, C5-H, 1  $\times$  C6-H), 0.16 (1H, m, 1  $\times$  C6-H); <sup>13</sup>C NMR (CDCl<sub>3</sub>, 100 MHz):  $\delta$  157.3 (C8), 136.7 (C10), 128.4, 128.0 (C11, C12, C13), 66.7 (C9), 31.7 (C3), 27.6 (C7), 27.3 (C4), 22.5 (C2), 17.4 (C5), 13.9 (C1), 12.3 (C6); HRMS: (ESI<sup>+</sup>) Calculated for C<sub>15</sub>H<sub>22</sub>NO<sub>2</sub>: 248.1645. Found [M + H]<sup>+</sup>: 248.1642.

### Benzyl ((1*R*\*,2*S*\*)-2-butylcyclopropyl)(methyl)carbamate (*cis*-12c)

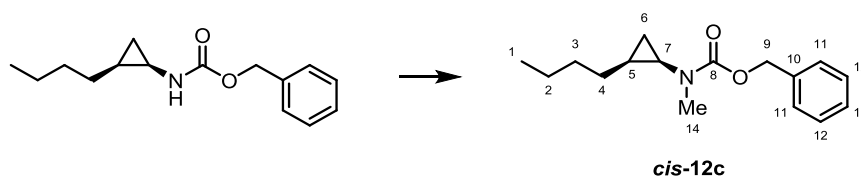

To a solution of NaH (58 mg, 2.4 mmol) in THF (1.6 mL) was added a solution of benzyl ((1*R*\*,2*S*\*)-2-butylcyclopropyl)carbamate (120 mg, 0.485 mmol) in THF (0.25 mL) and the reaction was stirred at 0 °C for 1 h. Methyl iodide (150  $\mu$ L, 2.4 mmol) was added dropwise at 0 °C and the reaction was stirred at r.t. for 18 h. Water (5 mL) was added to the reaction mixture and the solution was extracted with Et<sub>2</sub>O (3  $\times$  5 mL). The organic extracts were combined, washed with brine (5 mL), dried over Na<sub>2</sub>SO<sub>4</sub> and concentrated *in vacuo*. The crude mixture was purified by column chromatography (10% EtOAc/hexane) to yield the title compound *cis*-12c (99.2 mg, 78%) as a colorless oil;  $\nu_{\text{max}}$  / cm<sup>-1</sup>: 2927 (s), 1701 (s), 1455 (m), 1391 (s), 1344 (s), 1150 (s); <sup>1</sup>H NMR (CDCl<sub>3</sub>, 400 MHz):  $\delta$  7.39-7.28 (5H, m, 2  $\times$  C11-H, 2  $\times$  C12-H, C13-

H), 5.19 -5.09 (2H, m, C9-H<sub>2</sub>), 2.91 (3H, s, C14-H<sub>3</sub>), 2.68 (1H, ddd, *J* = 7.5, 7.0, 4.5 Hz, C7-H), 1.58 (1H, m, 1 × C4-H), 1.37 – 1.25 (4H, m, C2-H<sub>2</sub>, C3-H<sub>2</sub>), 0.99 – 0.81 (6H, m, C1-H<sub>3</sub>, 1 × C4-H, C5-H, 1 × C6-H), 0.32 (1H, m, 1 × C6-H); <sup>13</sup>C NMR (CDCl<sub>3</sub>, 100 MHz): δ 158.0 (C8), 136.9 (C10), 128.4, 127.9 (C11, C12, C13), 67.0 (C9), 35.8 (C14), 35.4 (C7), 31.7 (C3), 27.6 (C4), 22.6 (C2), 19.7 (C5), 14.1 (C1), 11.9 (C6); HRMS: (ESI<sup>+</sup>) Calculated for C<sub>16</sub>H<sub>23</sub>NNaO<sub>2</sub>: 284.1621. Found [M + Na]<sup>+</sup>: 284.1623.

**Benzyl (E)-hept-1-en-1-yl(methyl)carbamate (14e) and Benzyl hept-2-en-1-yl(methyl)carbamate (14f)**

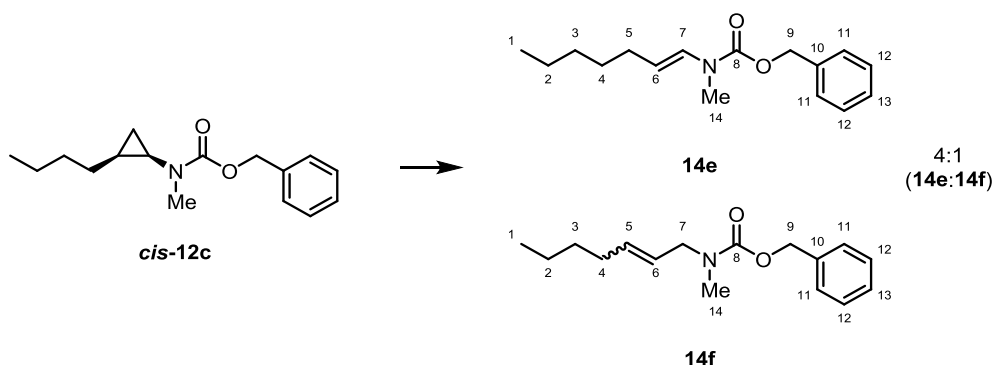

An oven dried reaction tube, fitted with a magnetic stirrer, was charged with [Rh(cod)<sub>2</sub>]BF<sub>4</sub> (3.7 mg, 0.009 mmol) and PPh<sub>3</sub> (7.1 mg, 0.027 mmol). The tube was fitted with a rubber septum and purged with argon. Benzyl ((1*R*\*,2*S*\*)-2-butylcyclopropyl)(methyl)carbamate (47 mg, 0.18 mmol) in argon sparged anhydrous toluene (2 mL) was added *via* syringe before aging the catalyst for *ca.* 5 minutes. The reaction was heated at 100 °C with stirring for 3 h. The mixture was cooled to r.t., concentrated *in vacuo* and purified by column chromatography (5% EtOAc/hexane) to yield regioisomer **14e** (31.1 mg, 66%, 1:1, mixture of rotamers A:B) as a colorless oil and regioisomer **14f** (9.4 mg, 20%, tentatively assigned mixture of *E/Z* diastereomers) as a colorless oil.

Data for the major regioisomer **14e**:  $\nu_{\text{max}}$  / cm<sup>-1</sup>: 2928 (m), 1693 (s), 1403 (m), 1214 (m), 1153 (s); <sup>1</sup>H NMR (CDCl<sub>3</sub>, 400 MHz): δ 7.38-7.30 (5H, m, 2 × C11-H, A+B, 2 × C12-H, A+B, C13-H, A+B), 7.01 (0.50H, d, *J* = 14.0 Hz, C7-H, A), 6.89 (0.50H, d, *J* = 14.0 Hz, C7-H, B), 5.19 (2H, s, C9-H<sub>2</sub>, A+B), 4.85 (1H, dt, *J* = 14.0, 7.5 Hz, C6-H, A+B), 3.07-3.05 (3H, m, C14-H<sub>3</sub>, A+B), 2.08-1.99 (2H, m, C5-H<sub>2</sub>, A+B), 1.40-1.25 (6H, m, C2-H<sub>2</sub>, A+B, C3-H<sub>2</sub>, A+B, C4-H<sub>2</sub>, A+B), 0.89 (3H, t, *J* = 7.0 Hz, C1-H<sub>3</sub>, A+B); <sup>13</sup>C NMR (CDCl<sub>3</sub>, 100 MHz): δ 154.3, 153.9 (C8, A+B), 136.4 (C10, A+B), 128.5, 128.2, 128.0 (C11, A+B, C12, A+B, C13, A+B), 127.5 (C7, A+B), 110.0 (C6, A+B), 67.8, 67.6 (C9, A+B), 31.5 (CH<sub>2</sub>, A+B), 31.0 (C14, A+B), 30.2 (CH<sub>2</sub>,

*A+B*, **C5**, *A+B*), 22.5 (CH<sub>2</sub>, *A+B*), 14.1 (**C1**, *A+B*). **C2**, **C3** and **C4** could not be assigned. Aldehyde peaks appear due to decomposition of the product; HRMS: (ESI<sup>+</sup>) Calculated for C<sub>16</sub>H<sub>23</sub>NNaO<sub>2</sub>: 284.1621. Found [M + Na]<sup>+</sup>: 284.1618.

Data for the minor regioisomer **14f**:  $\nu_{\text{max}}$  / cm<sup>-1</sup>: 2929 (m), 1705 (s), 1397 (m), 1324 (m), 1256 (s), 1136 (s); <sup>1</sup>H NMR (400 MHz, CDCl<sub>3</sub>):  $\delta$  7.38-7.28 (5H, m, 2  $\times$  **C11-H**, 2  $\times$  **C12-H**, **C13-H**), 5.55 (1H, m, **C5-H**), 5.39 (1H, m, **C6-H**), 5.13 (2H, s, **C9-H**<sub>2</sub>), 3.87-3.79 (2H, m, **C7-H**<sub>2</sub>), 2.88-2.82 (3H, m, **C14-H**<sub>3</sub>), 2.06-1.97 (2H, m, **C4-H**<sub>2</sub>), 1.37-1.23 (4H, m, **C2-H**<sub>2</sub>, **C3-H**<sub>2</sub>), 0.90 (3H, t, *J* = **C1-H**<sub>3</sub>); <sup>13</sup>C NMR (100 MHz, CDCl<sub>3</sub>):  $\delta$  156.2 (**C8**), 137.0 (**C10**), 133.9 (**C5**), 128.4, 127.8, 127.8 (**C11**, **C12**, **C13**), 124.6 (**C6**), 67.0 (**C9**), 50.6 (**C7**), 33.1 (**C14**), 31.8 (**C4**), 31.3 (CH<sub>2</sub>), 22.2 (CH<sub>2</sub>), 13.9 (**C1**). **C2** and **C3** could not be assigned; HRMS: (ESI<sup>+</sup>) Calculated for C<sub>16</sub>H<sub>23</sub>NNaO<sub>2</sub>: 284.1621. Found [M + Na]<sup>+</sup>: 284.1619.

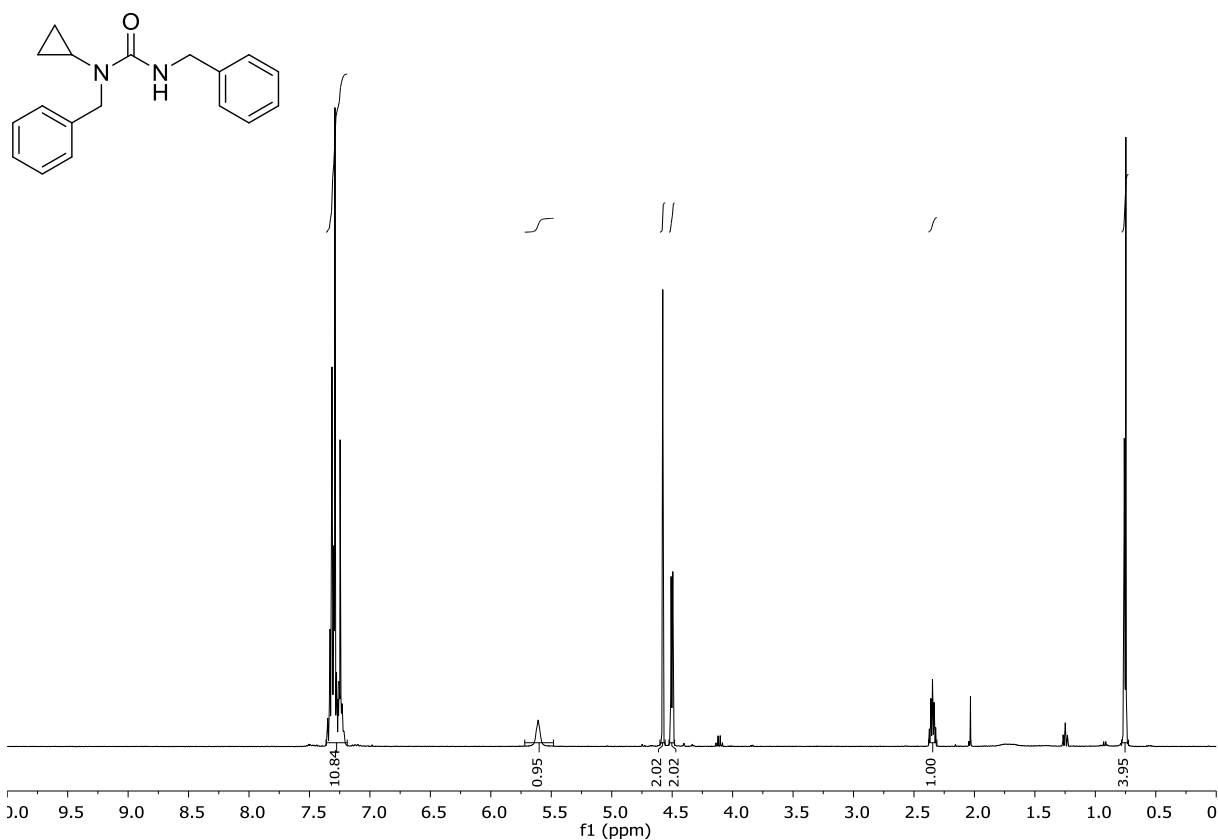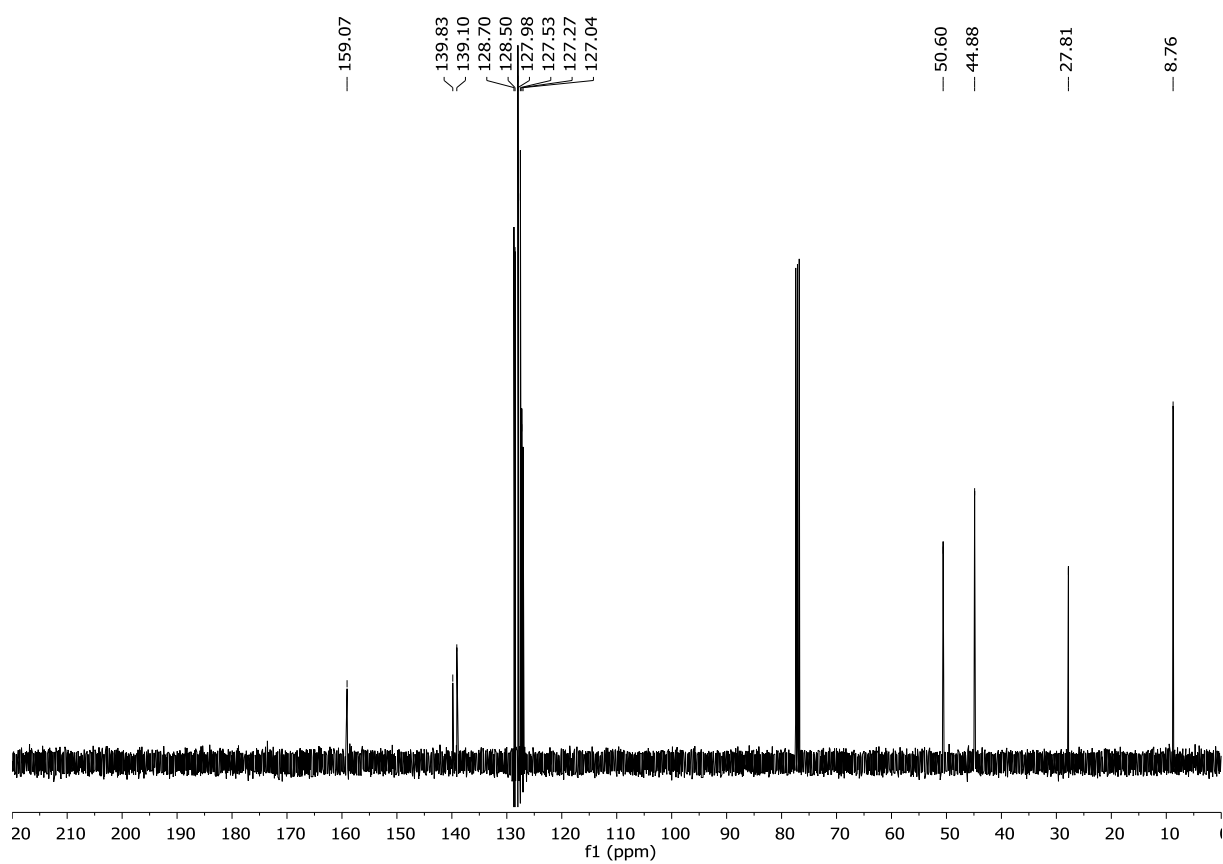

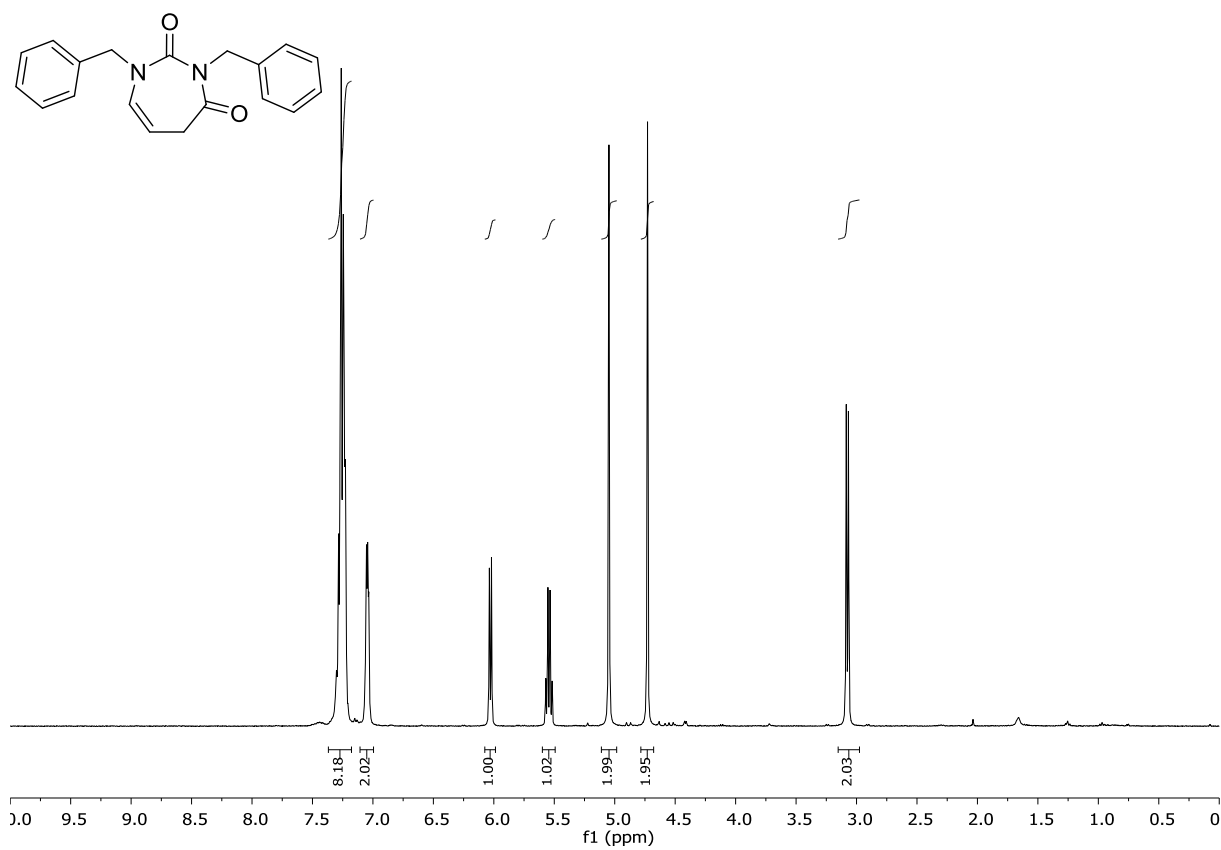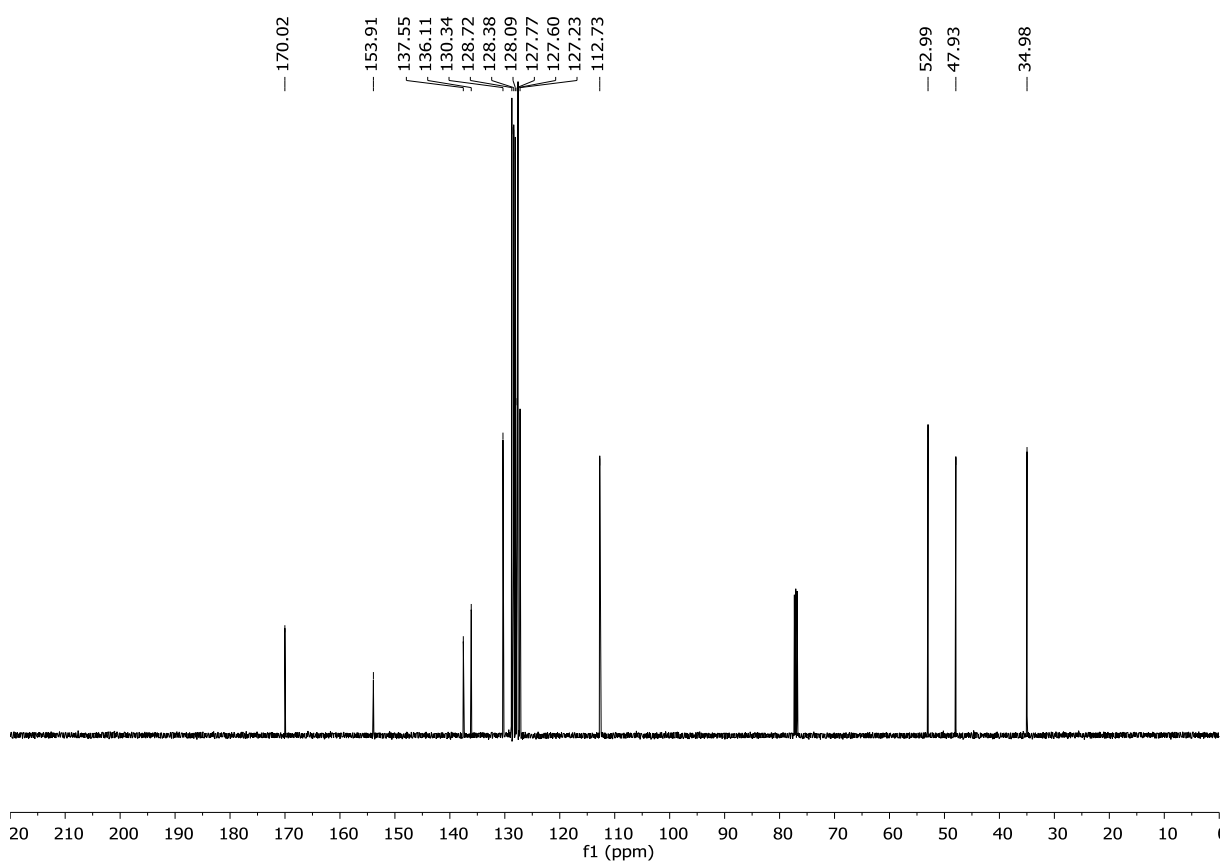

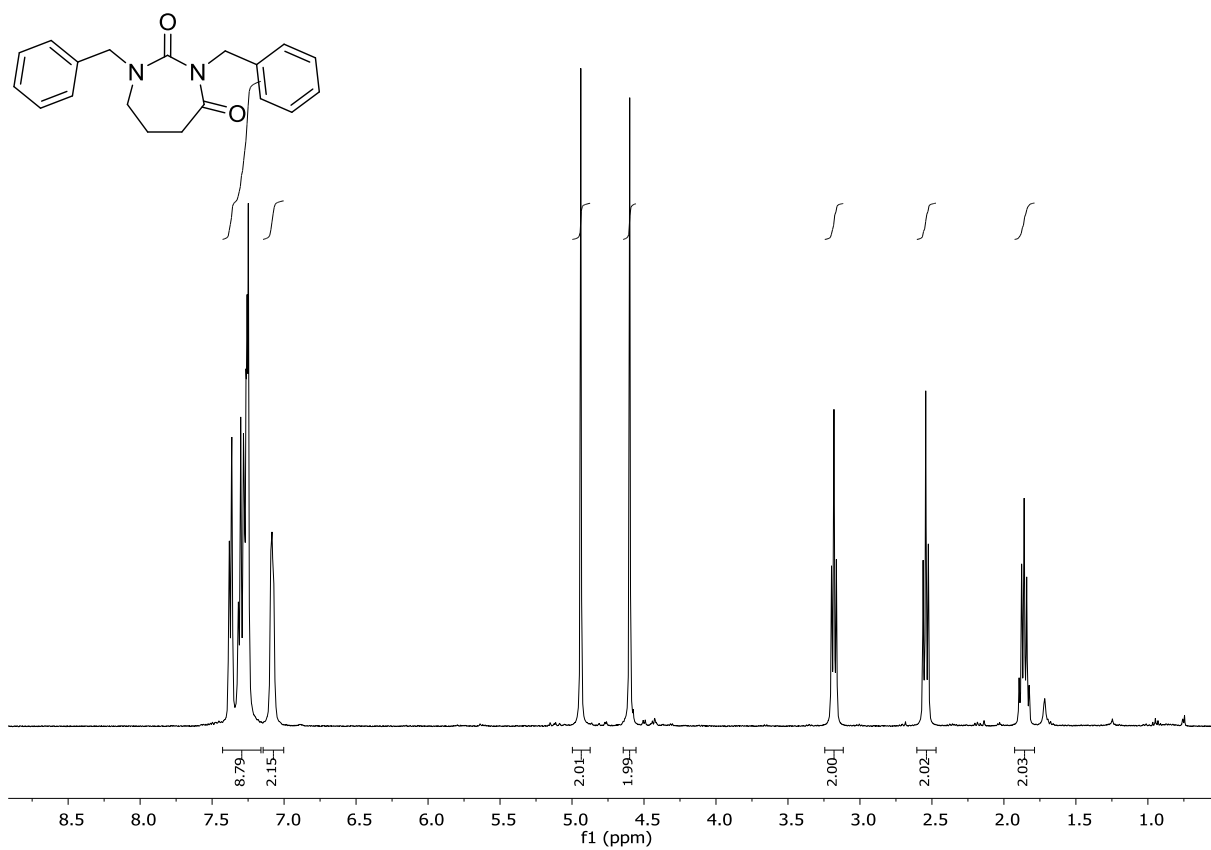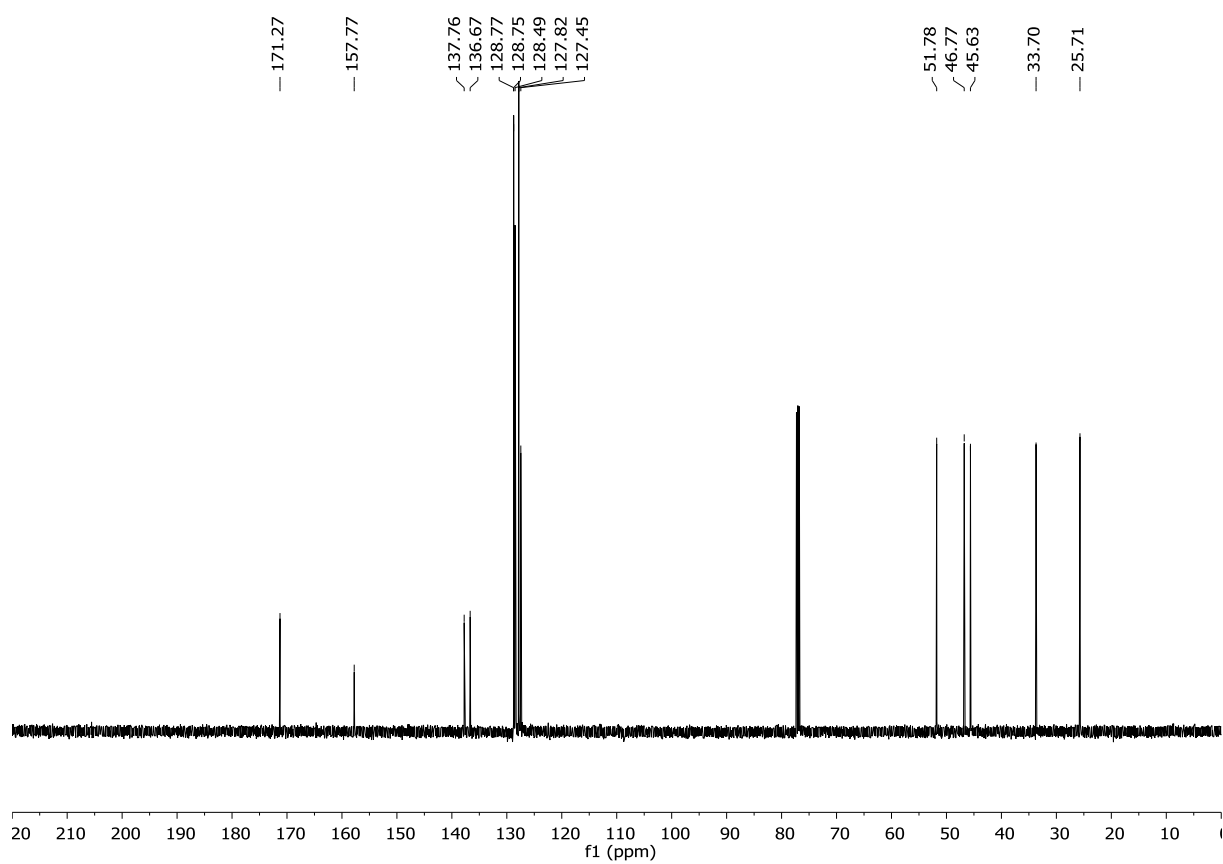

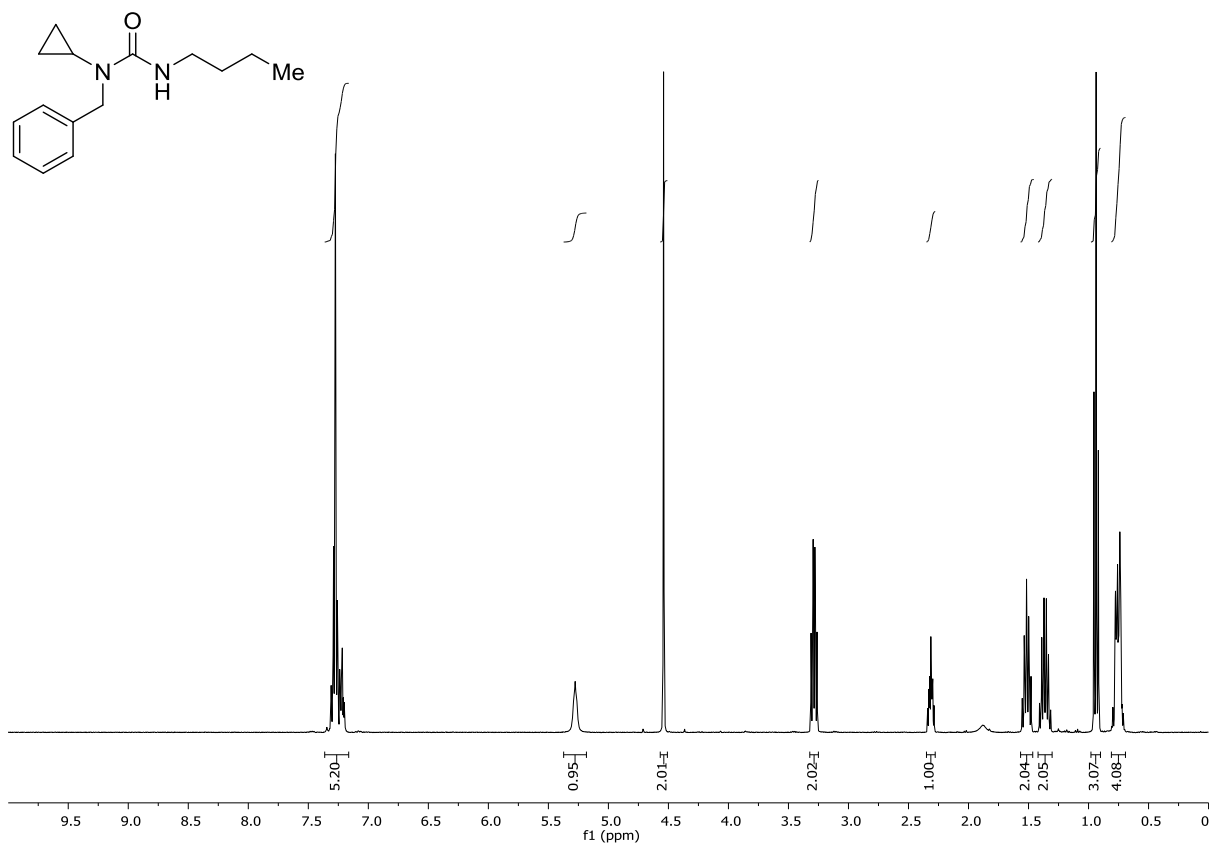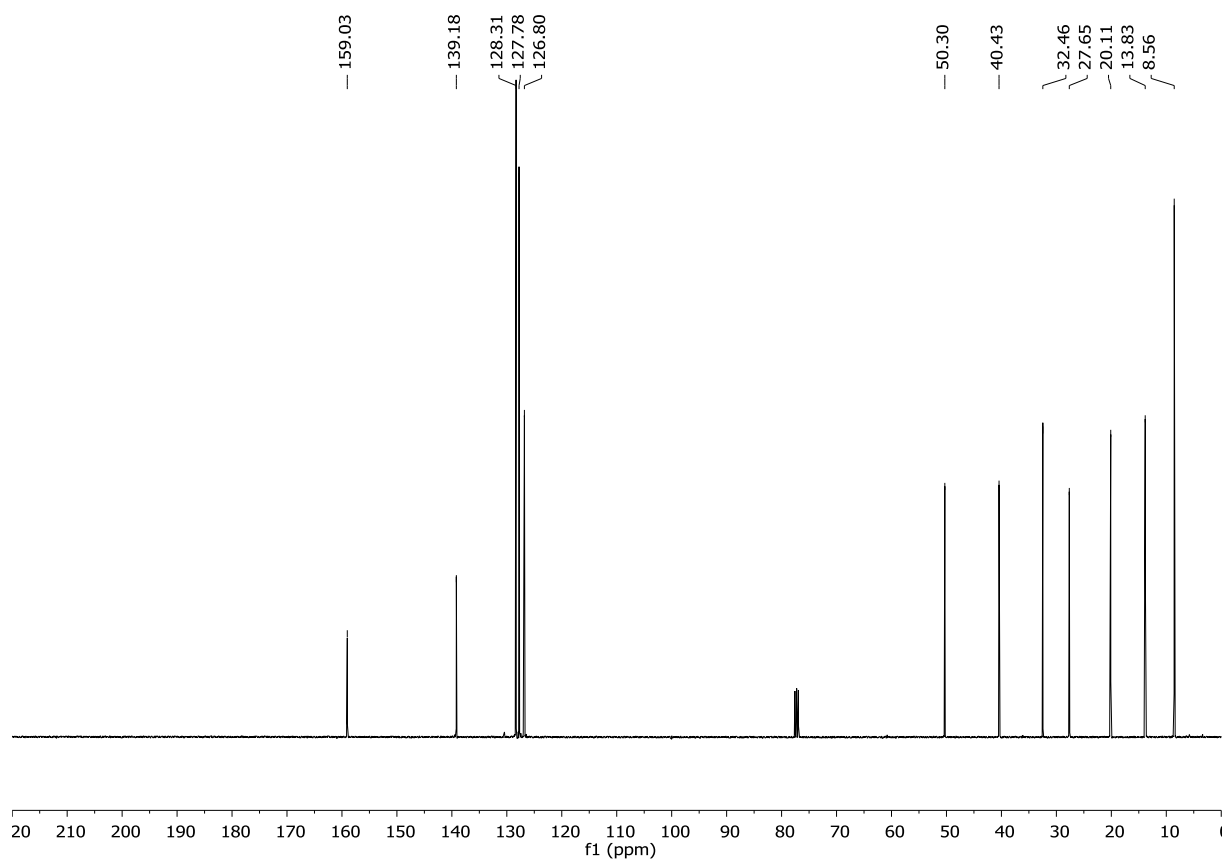



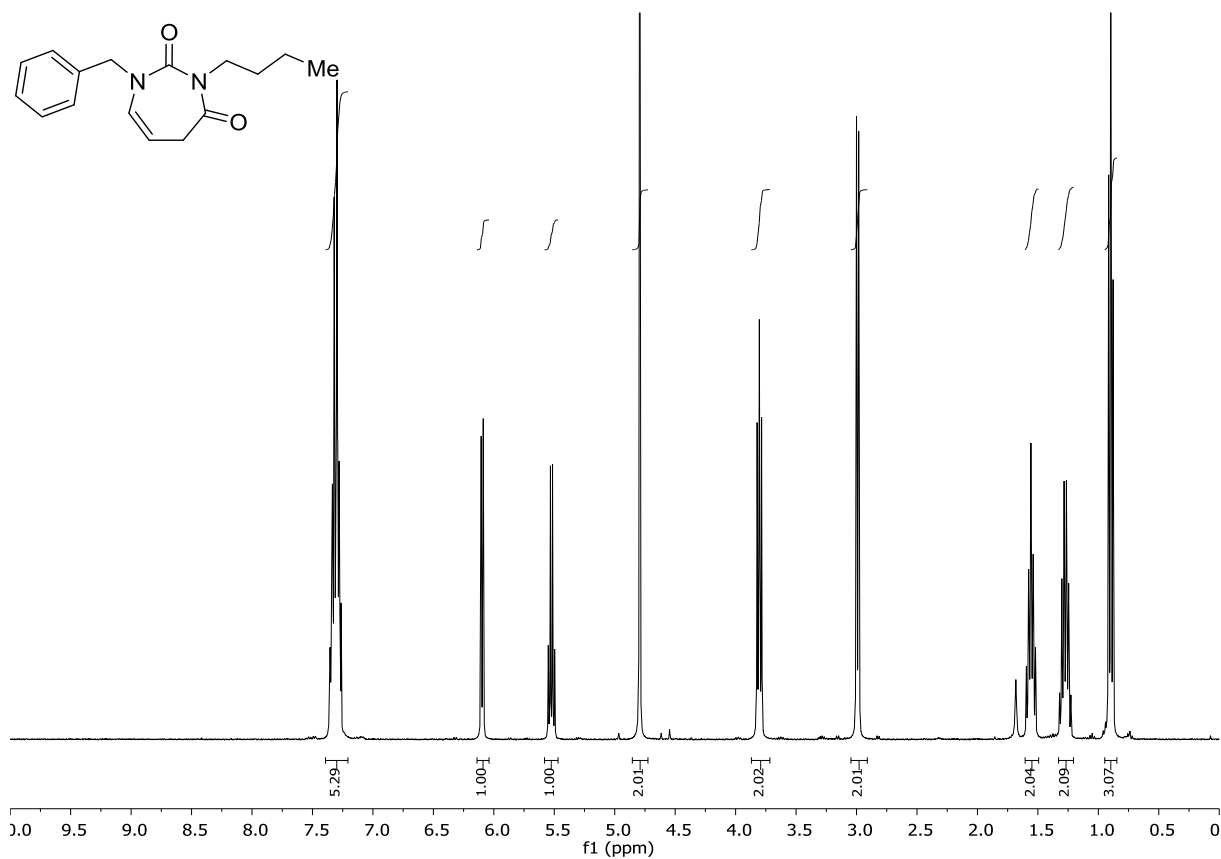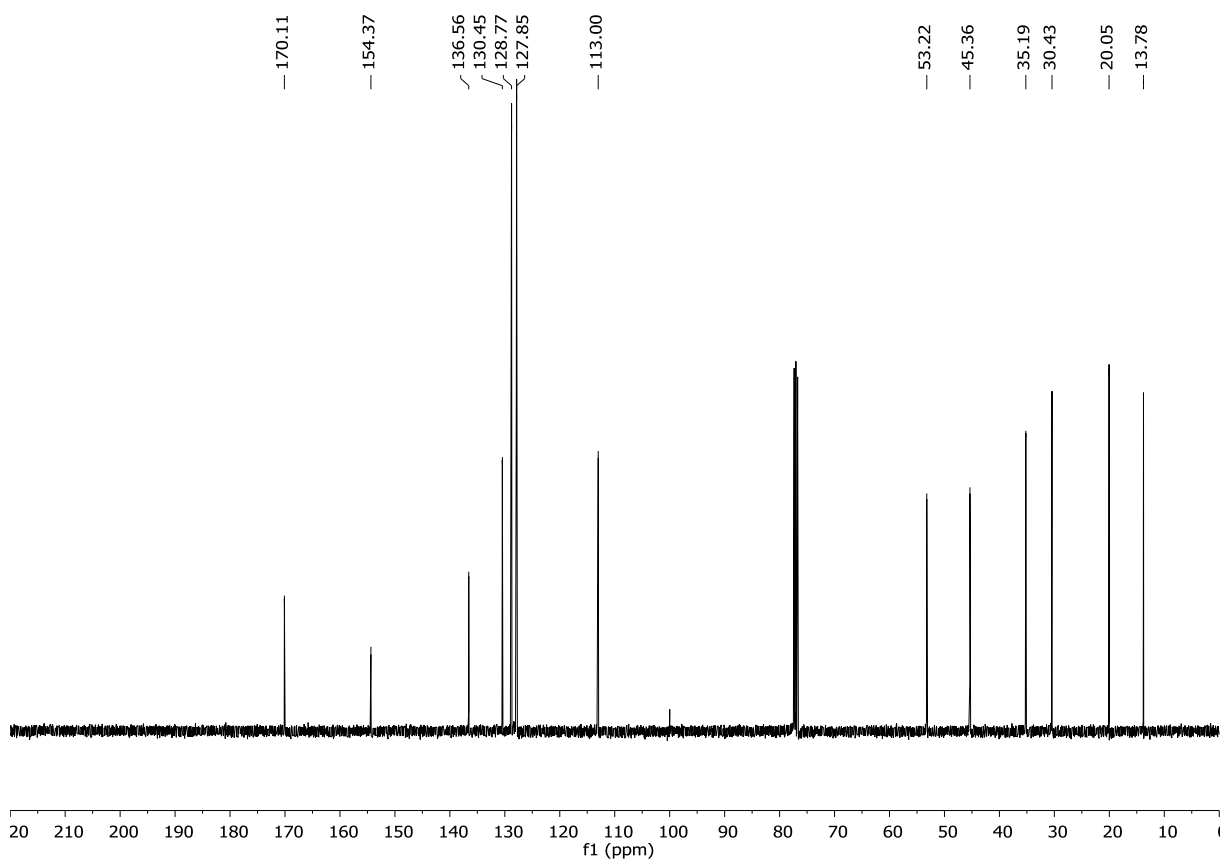

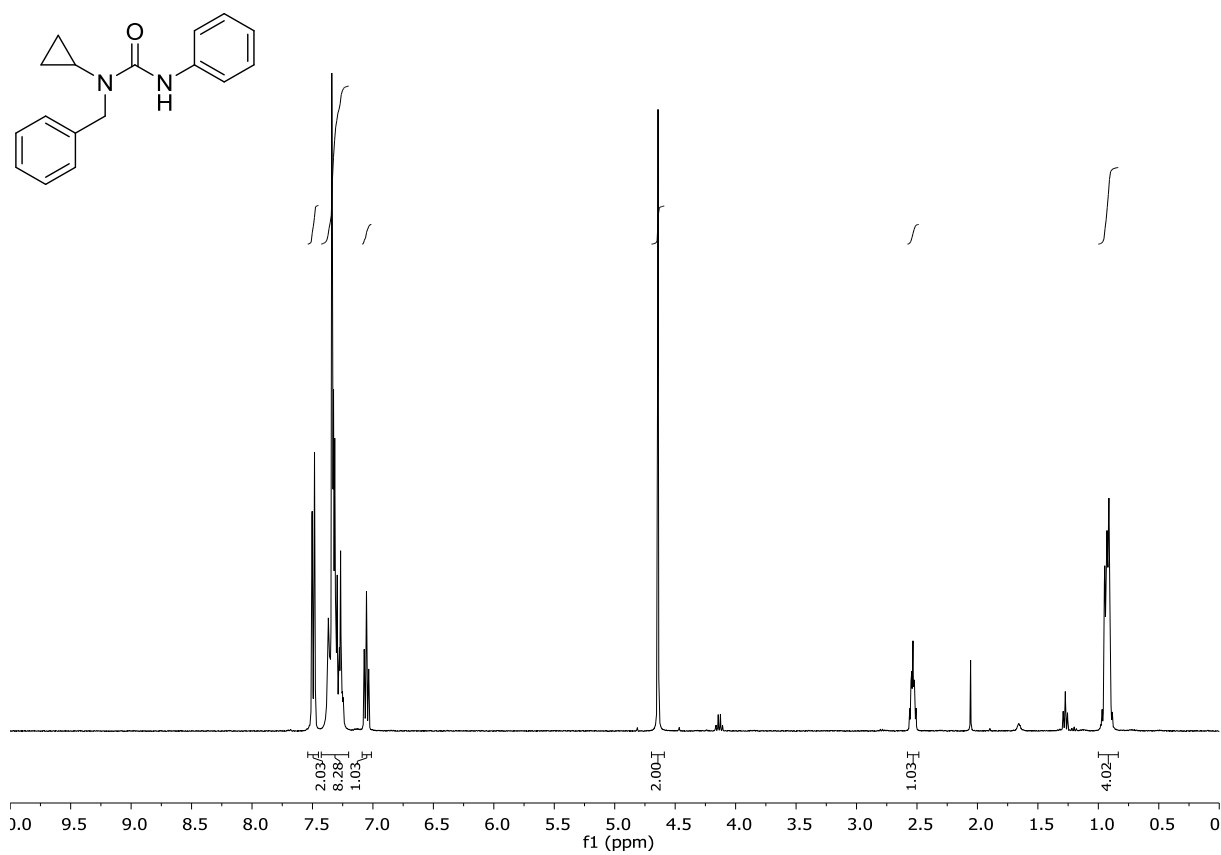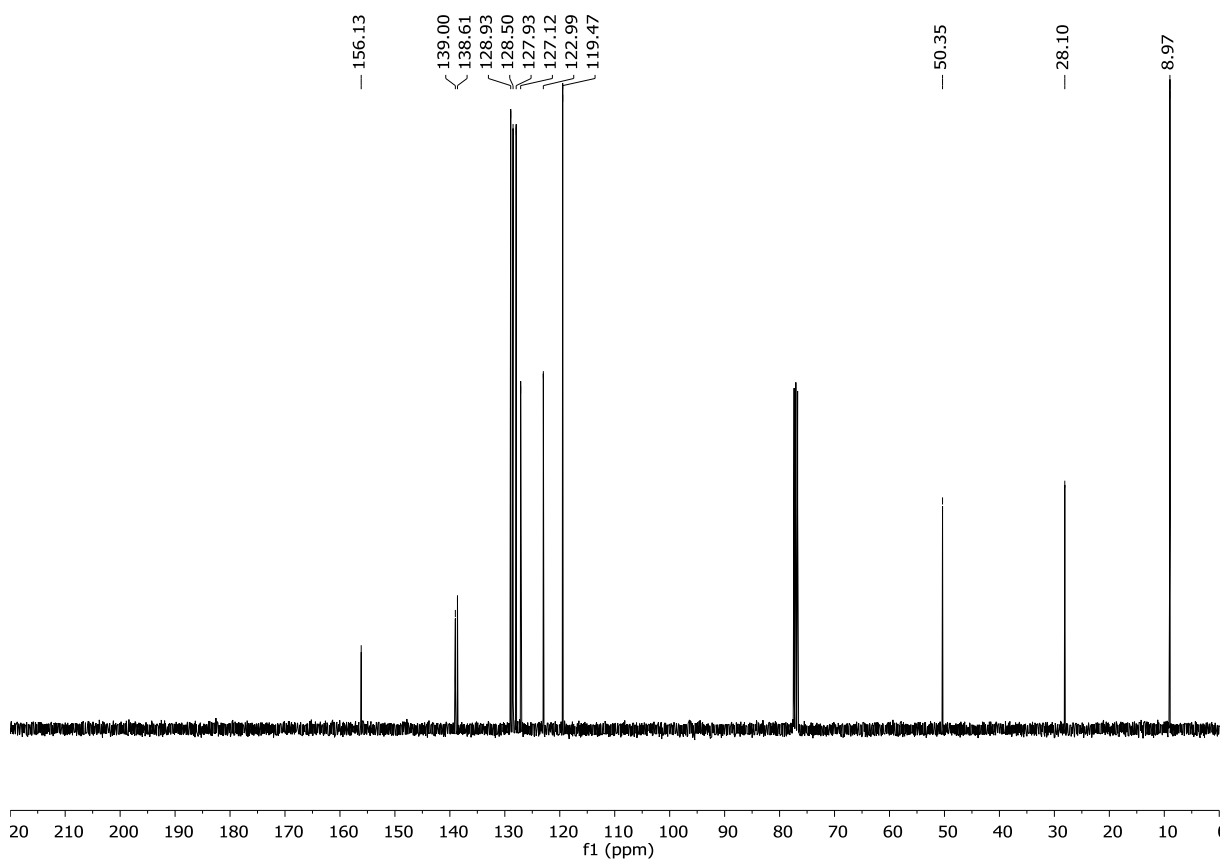

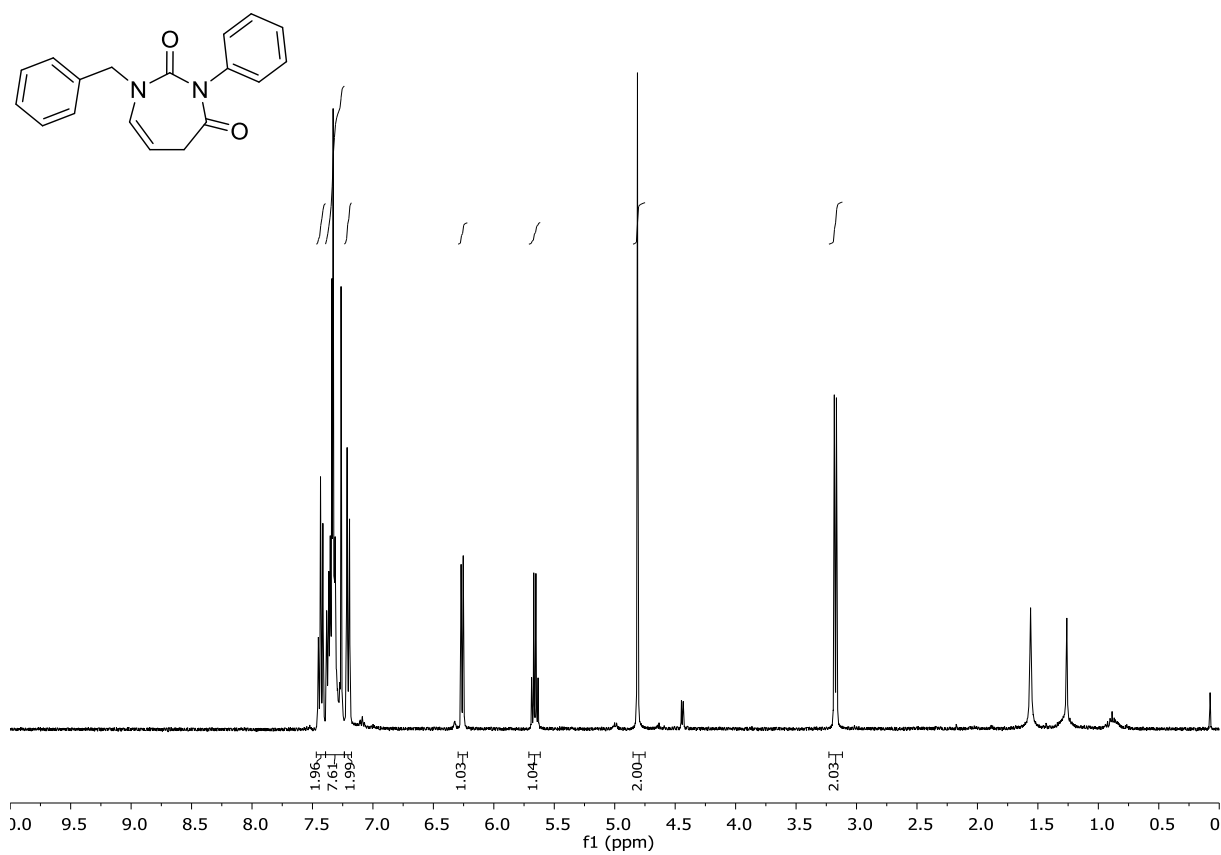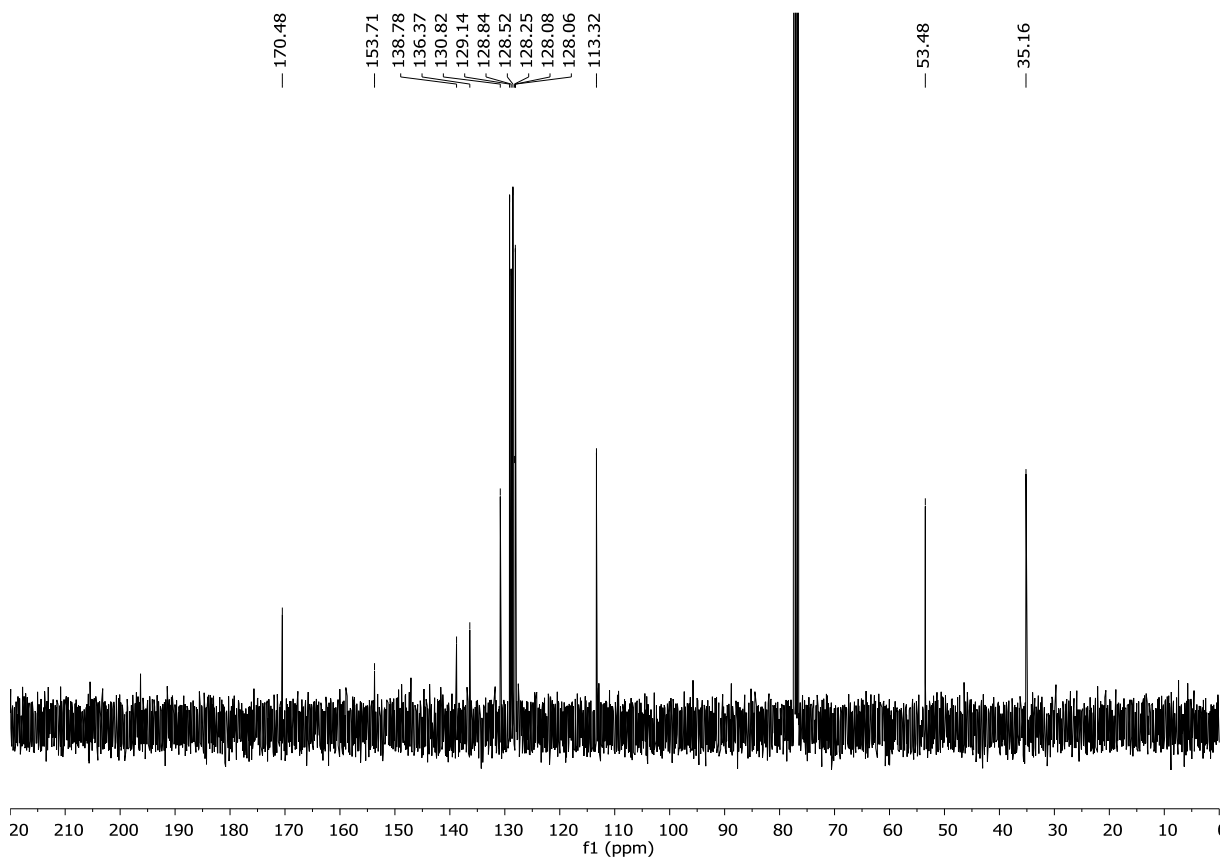

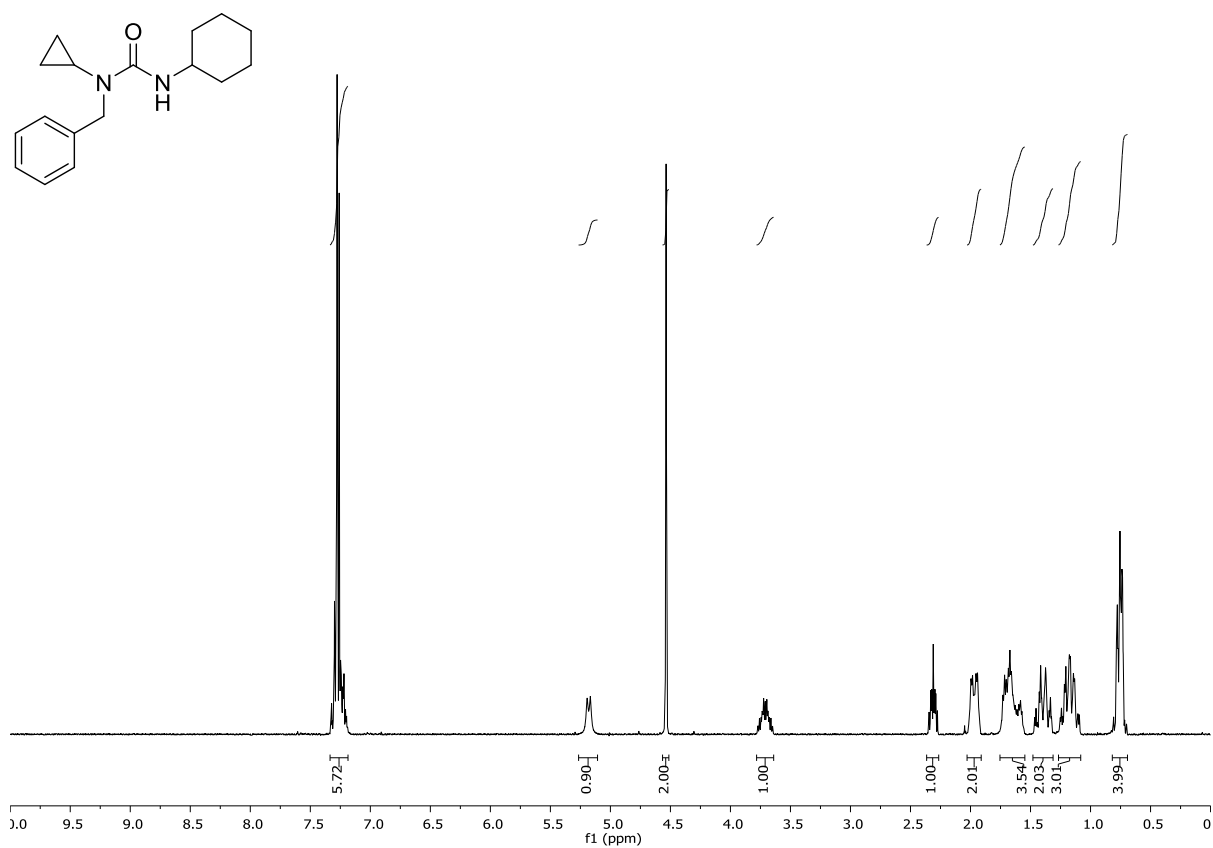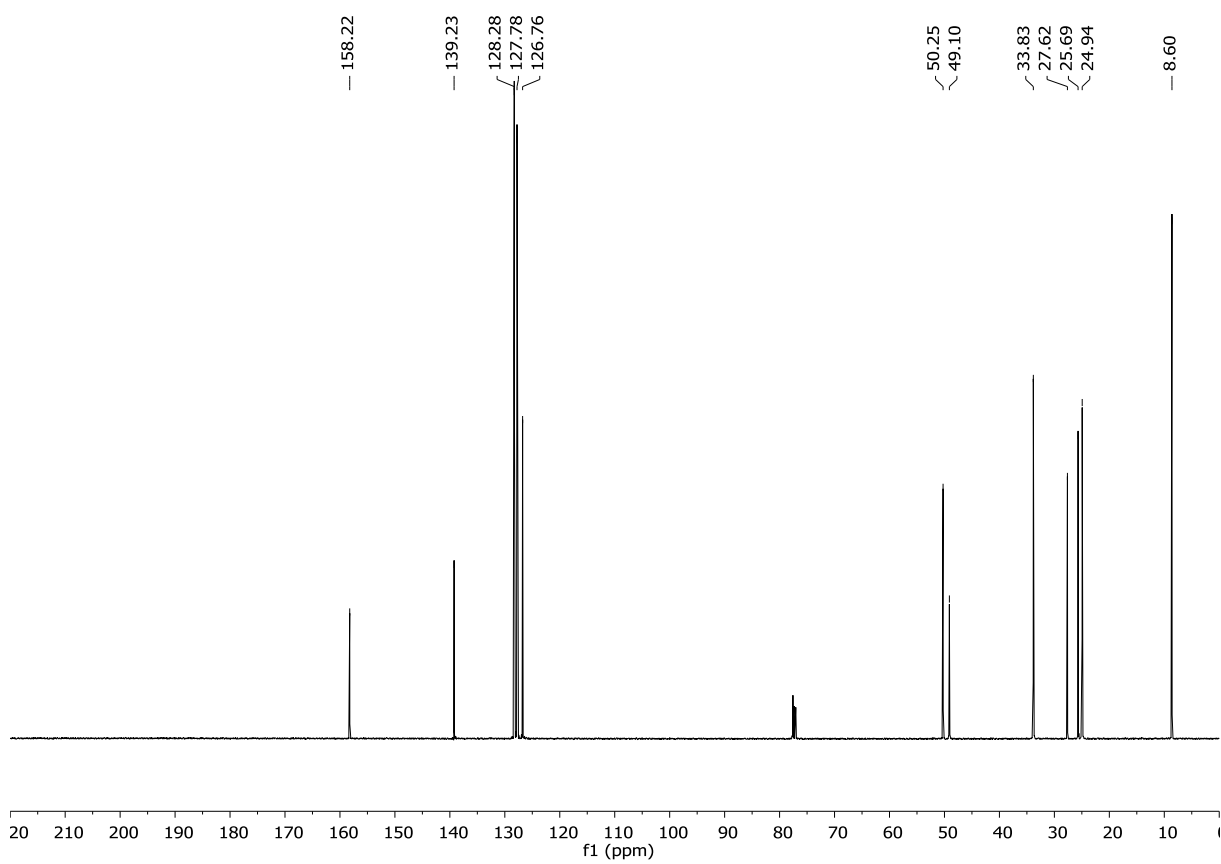

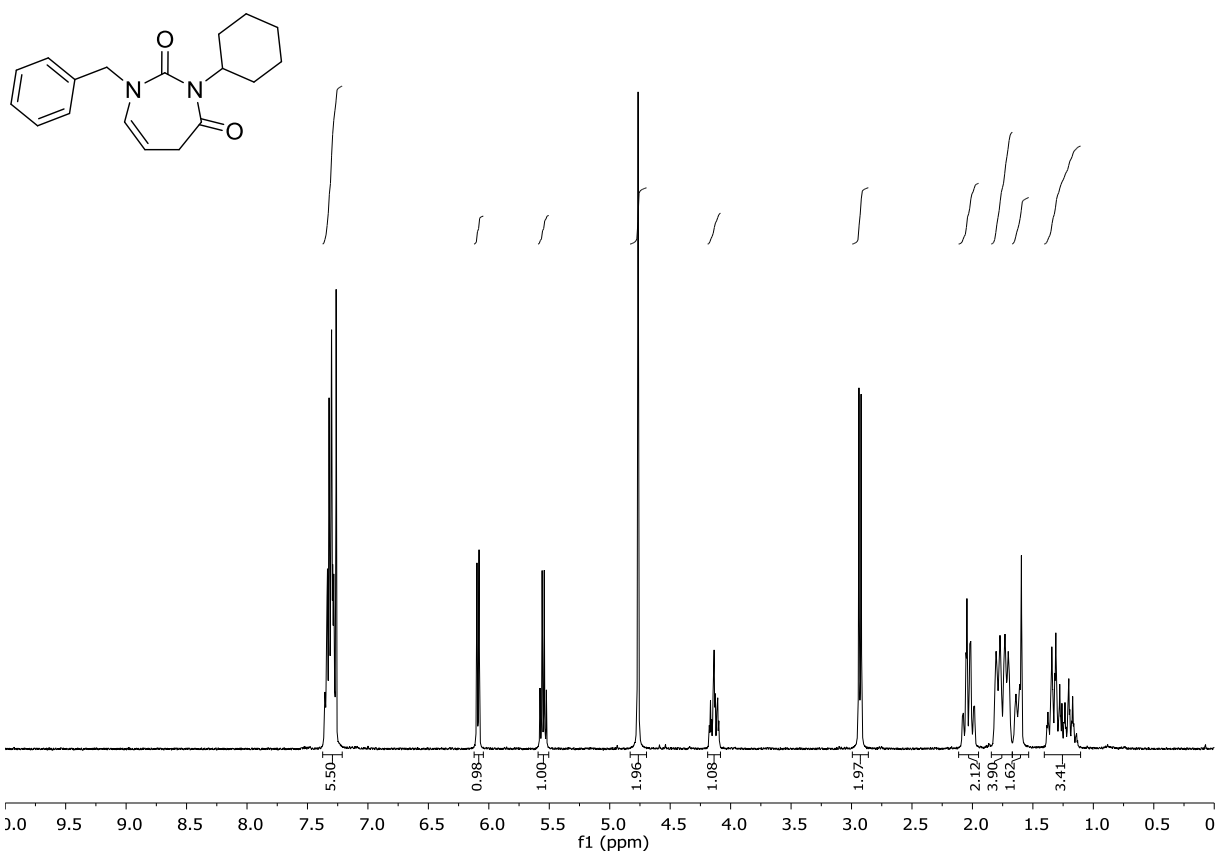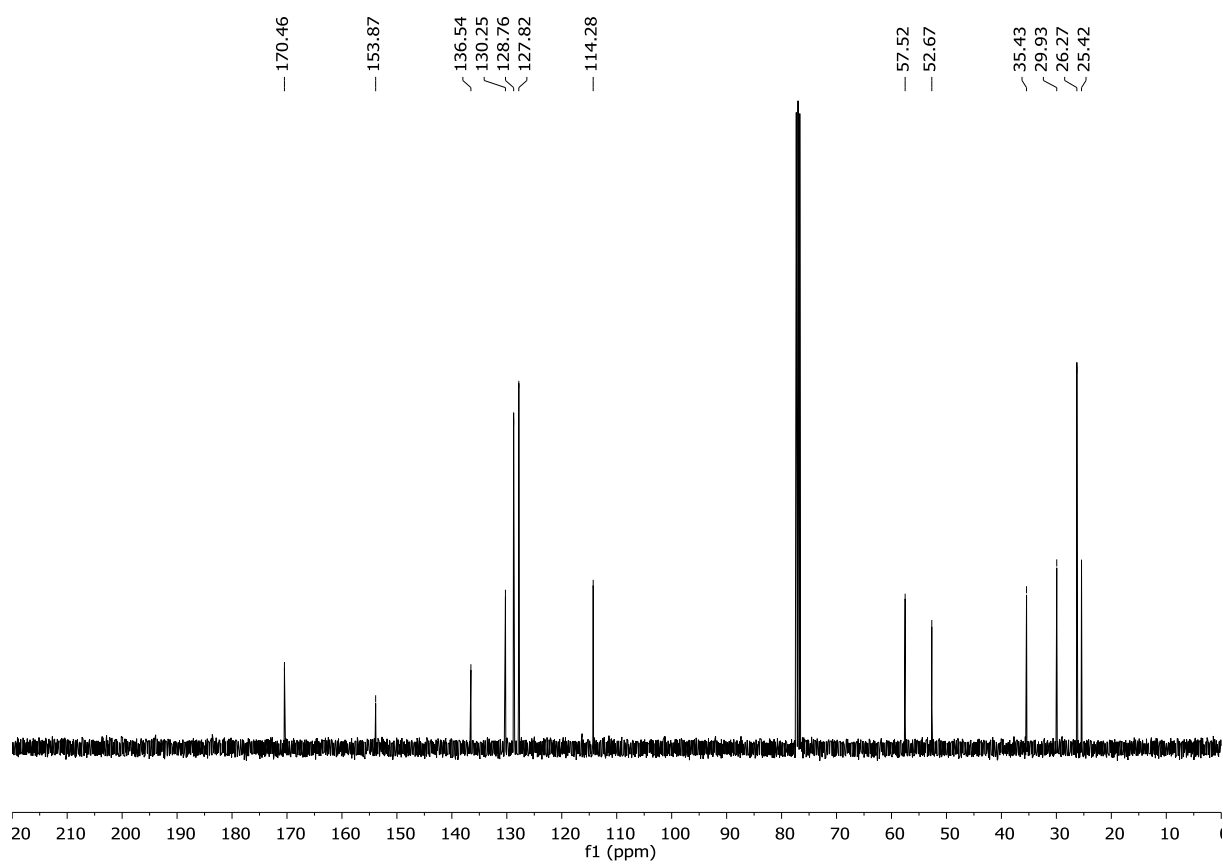

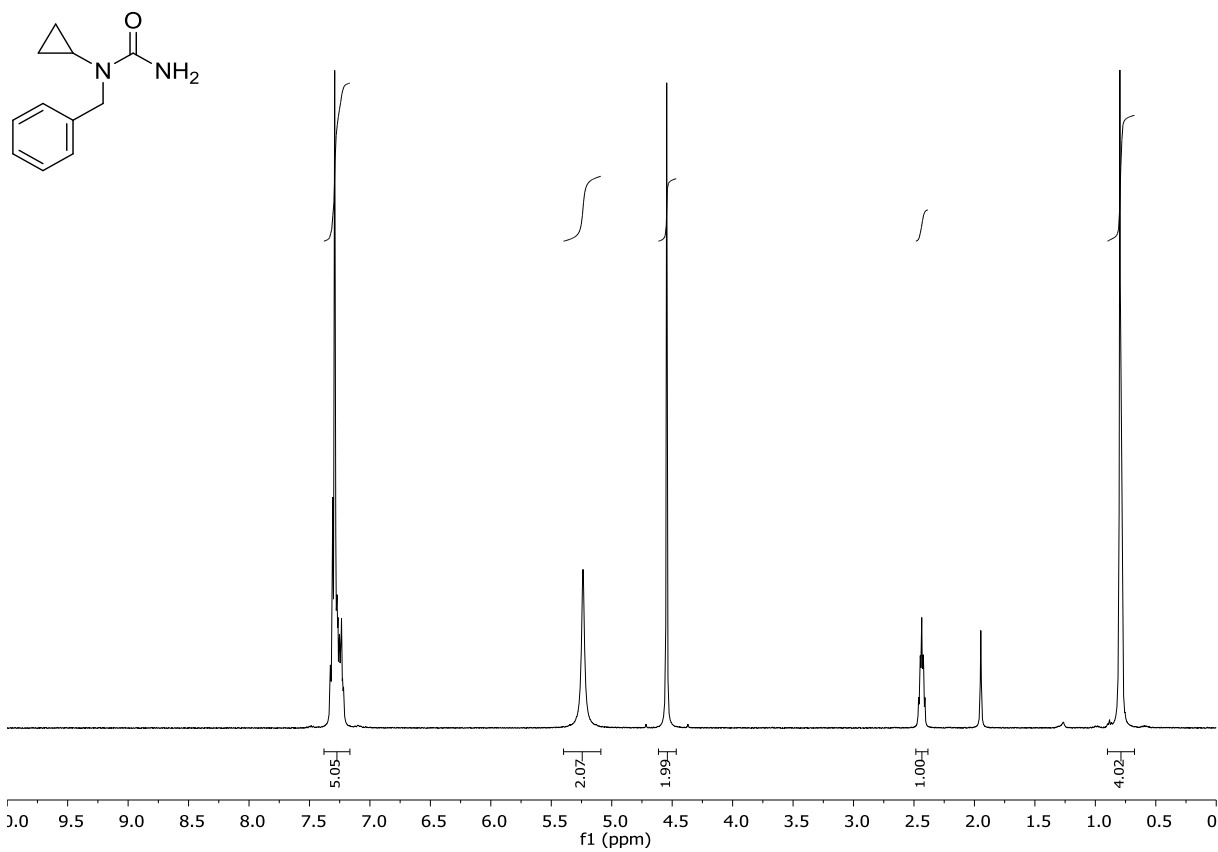

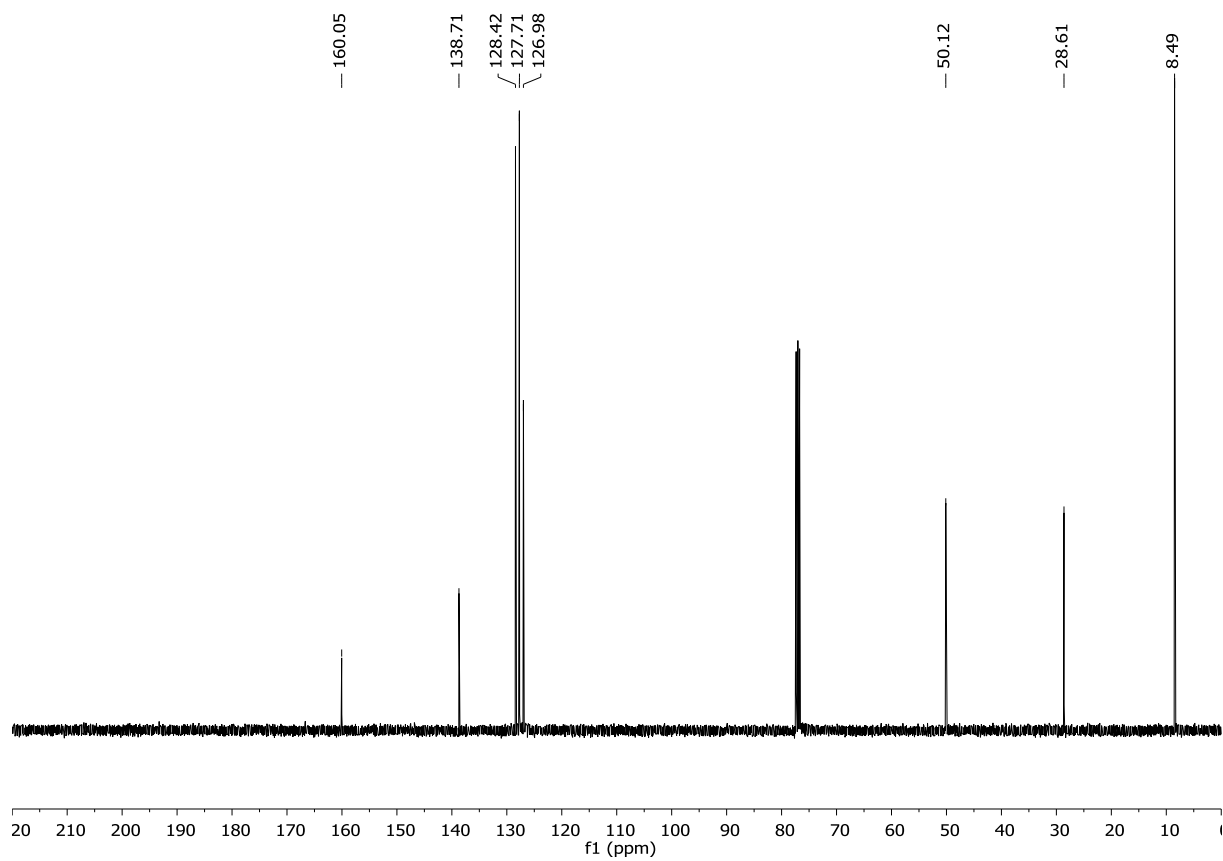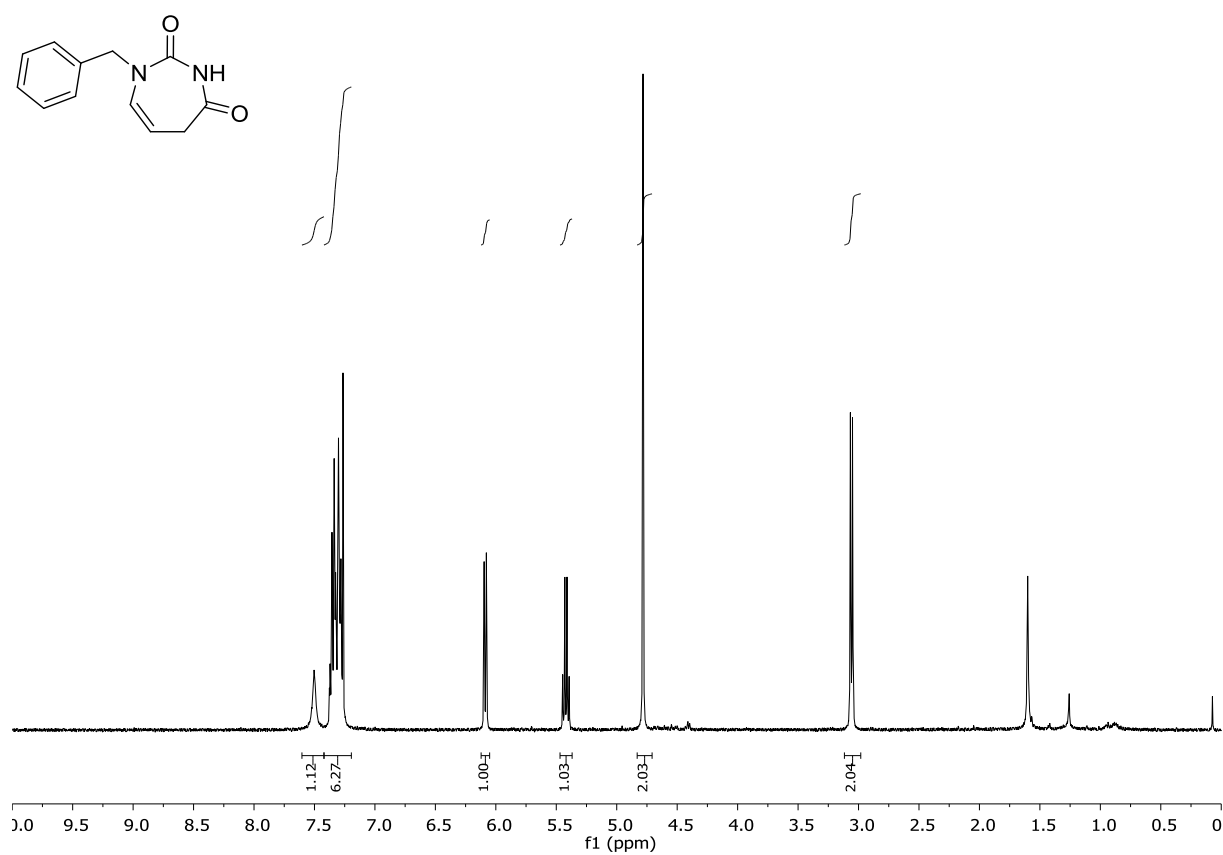

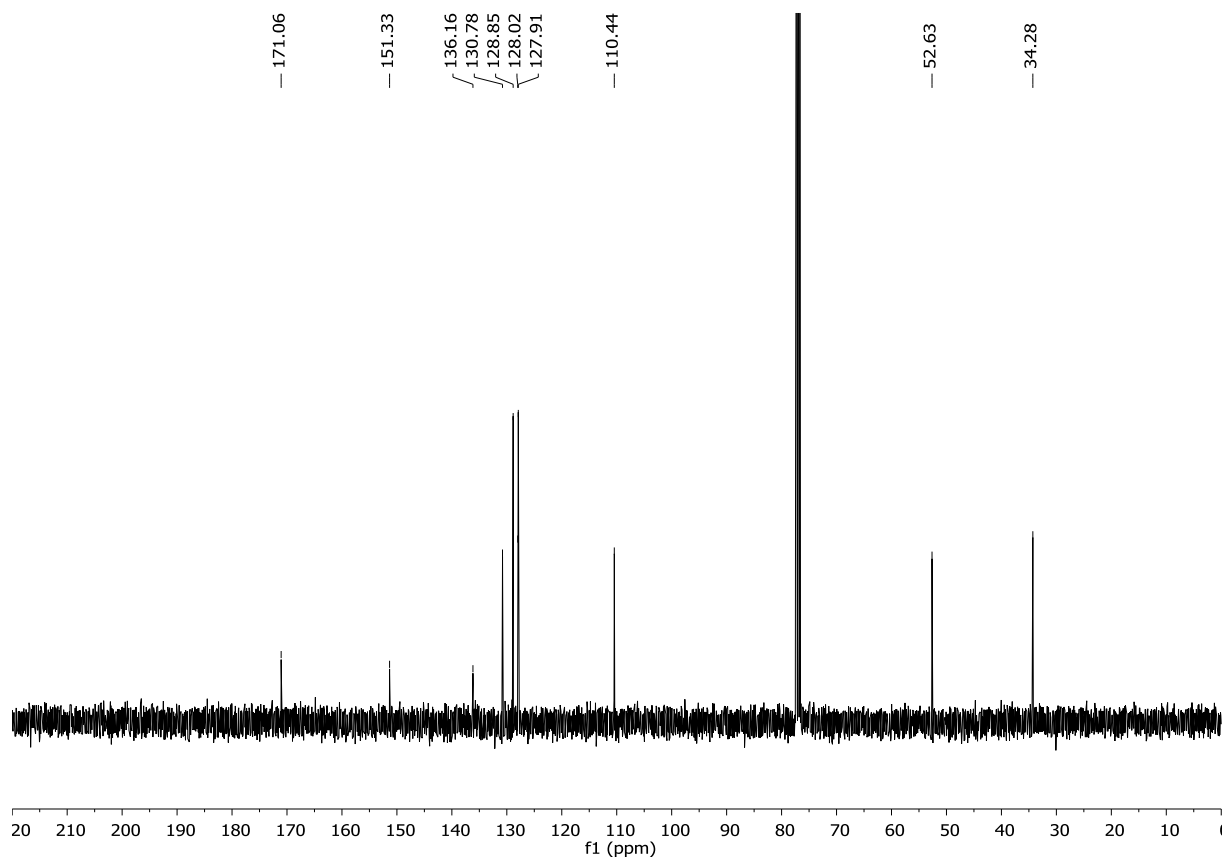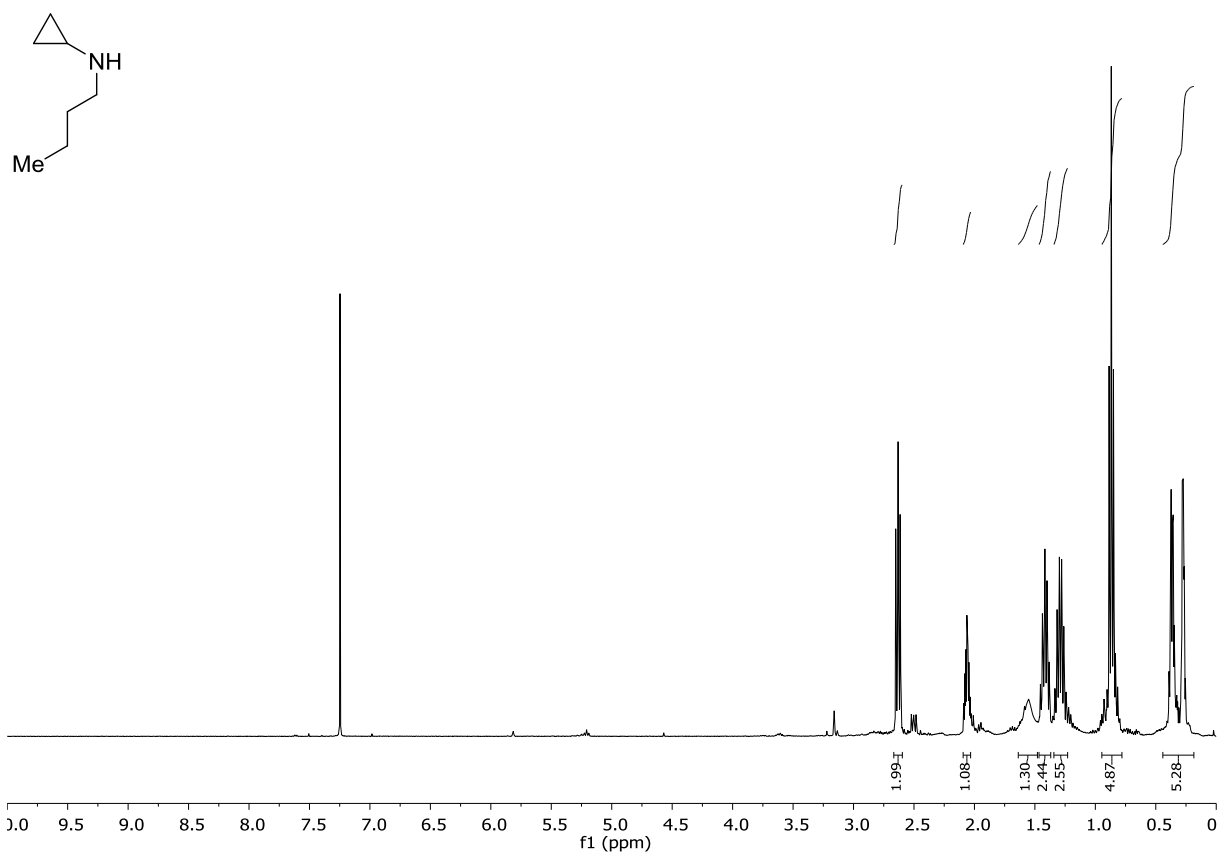



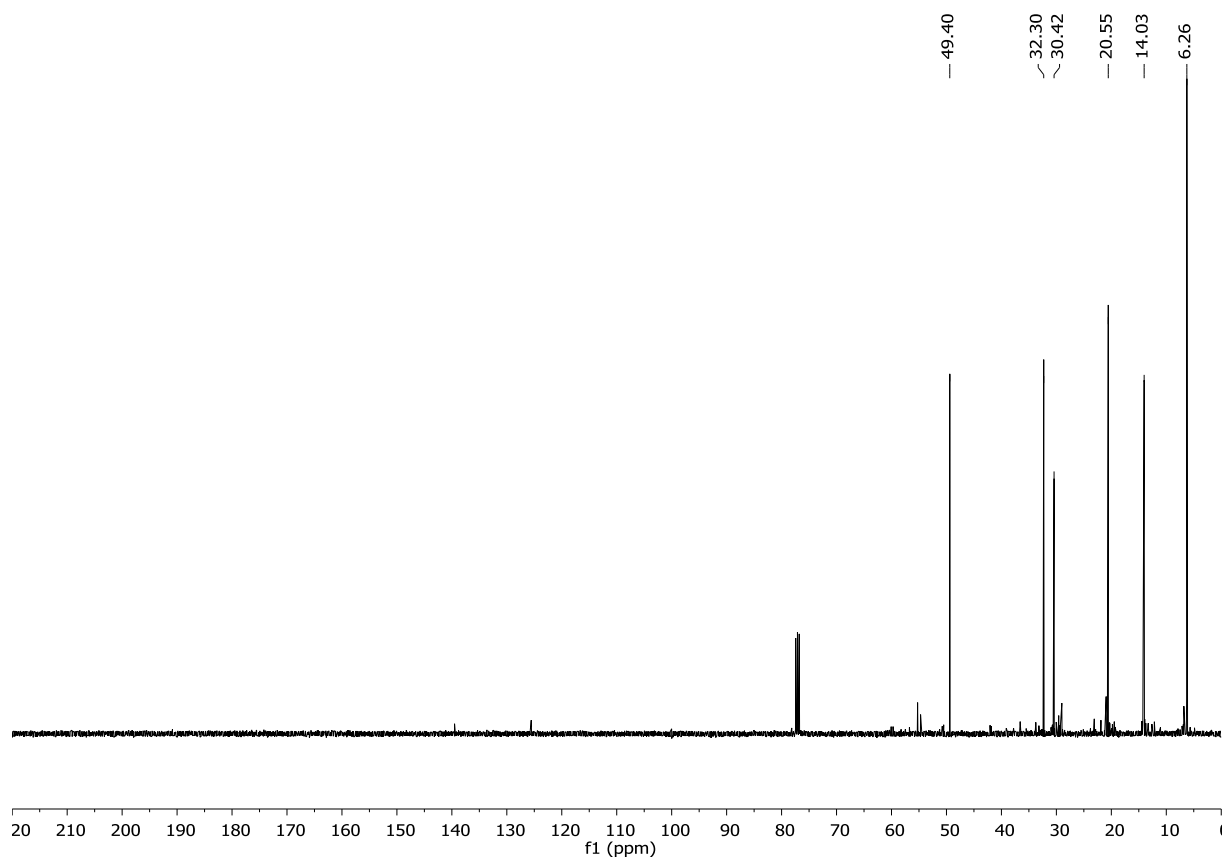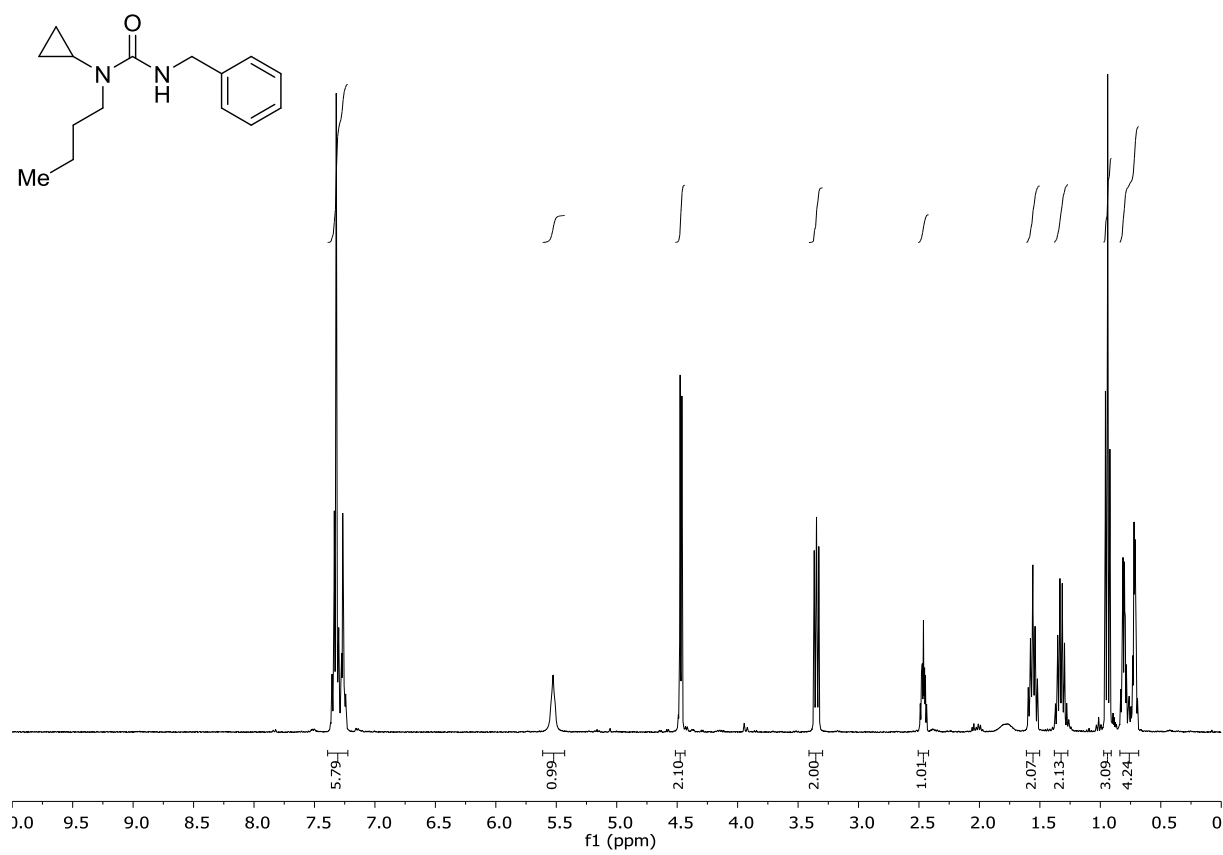

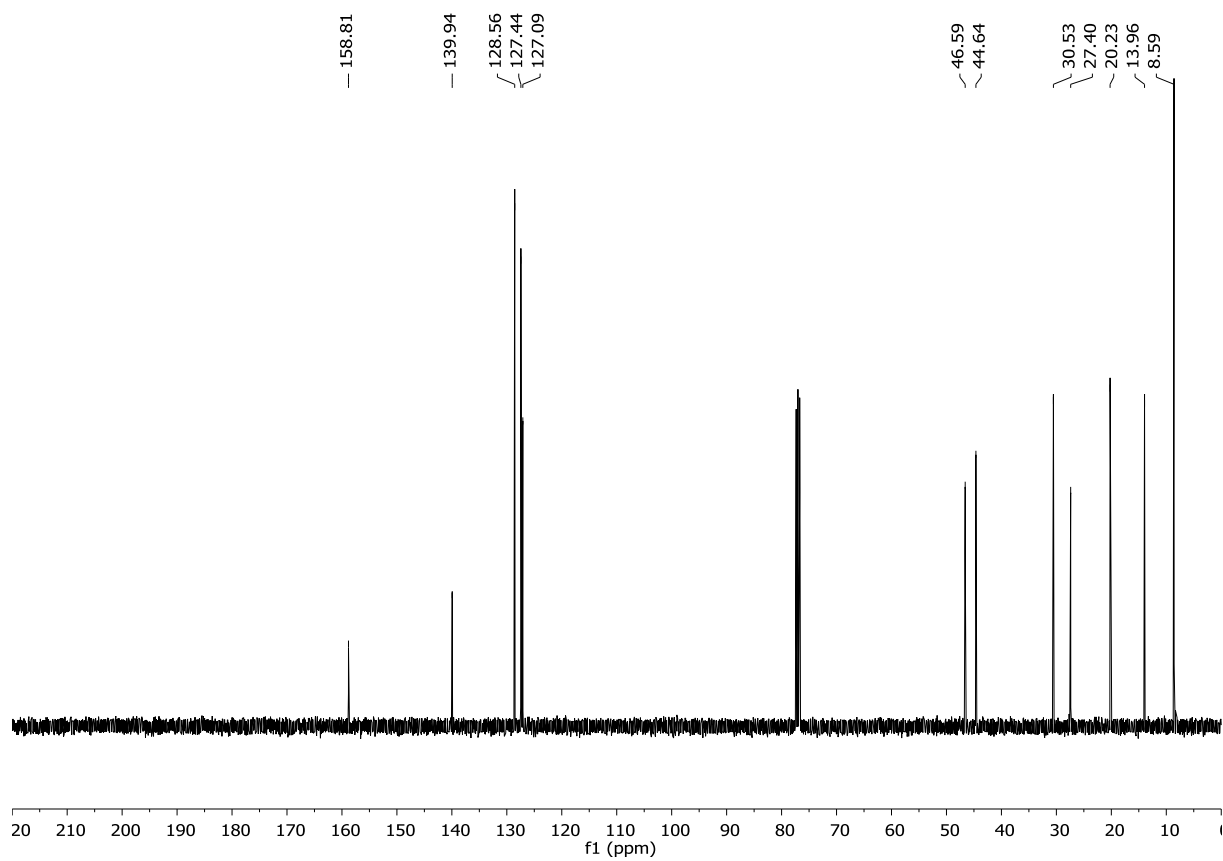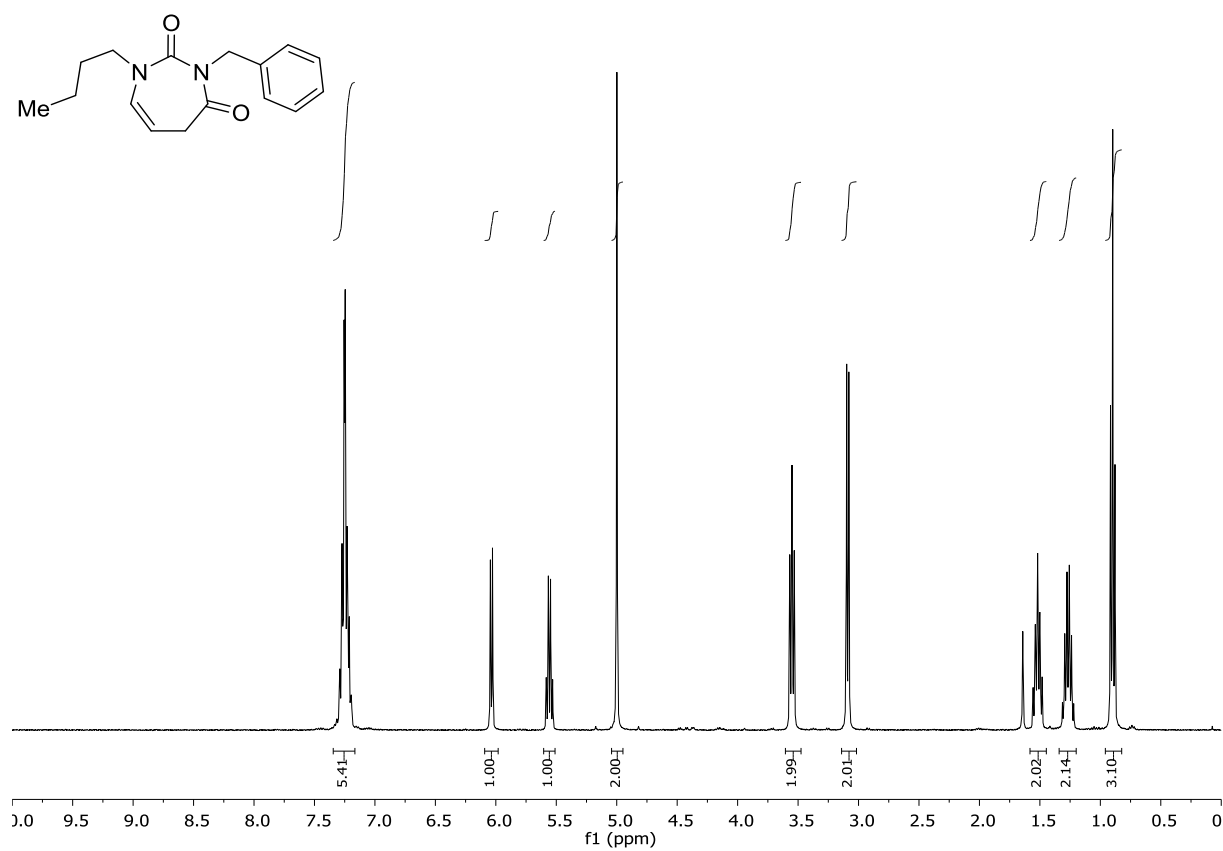

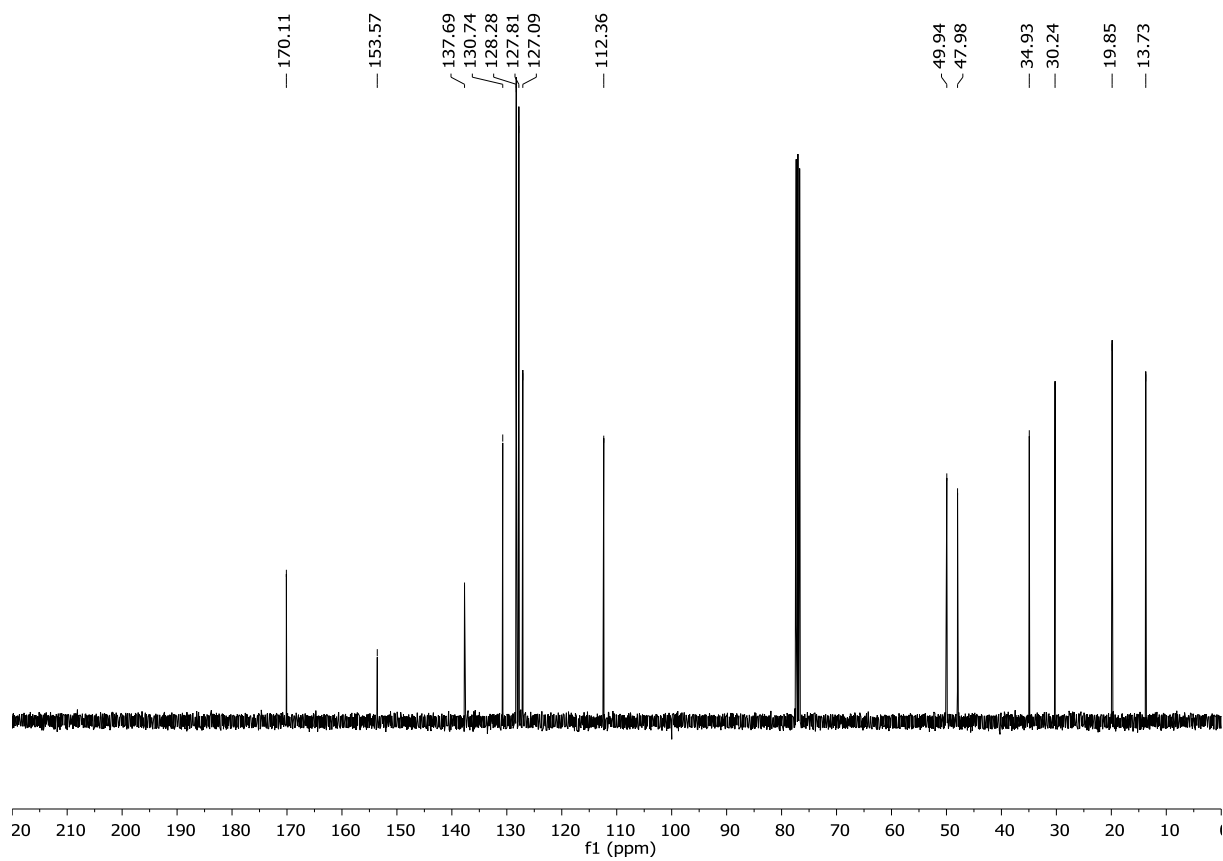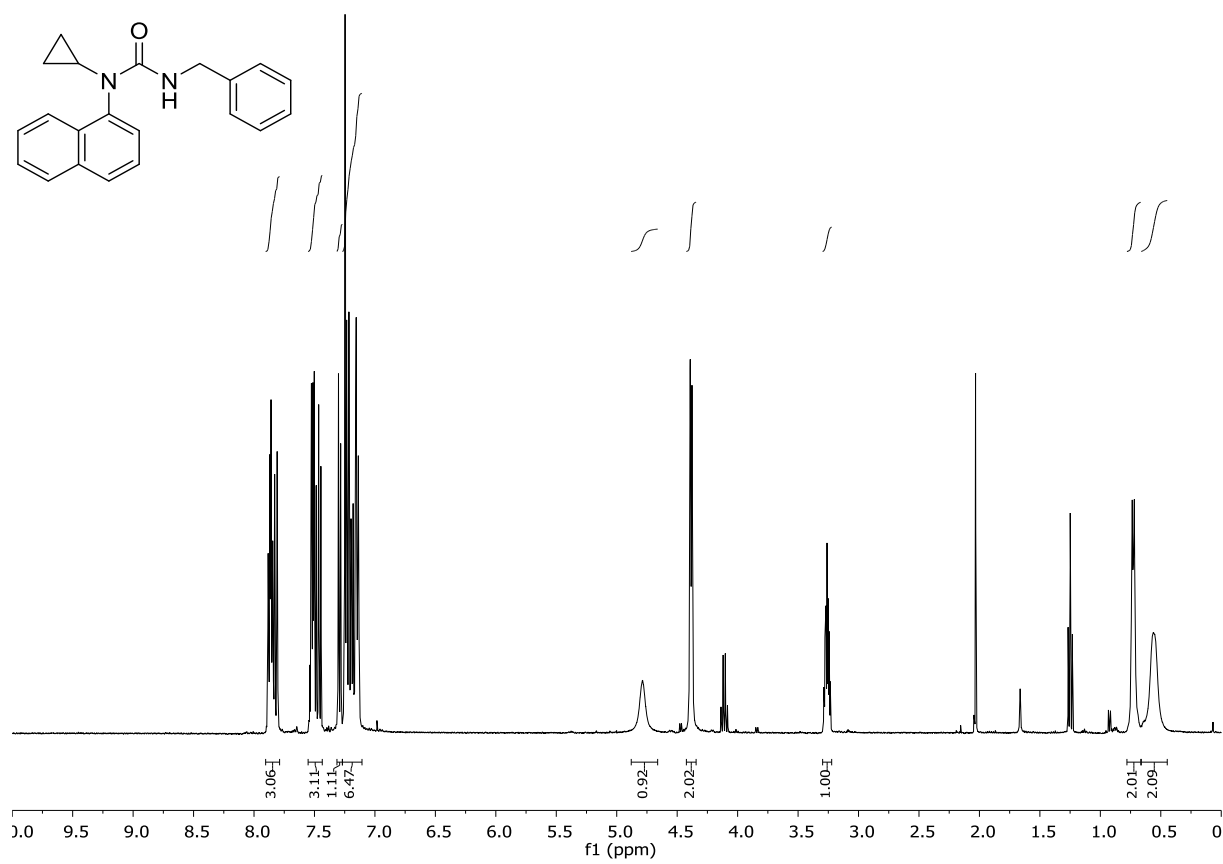

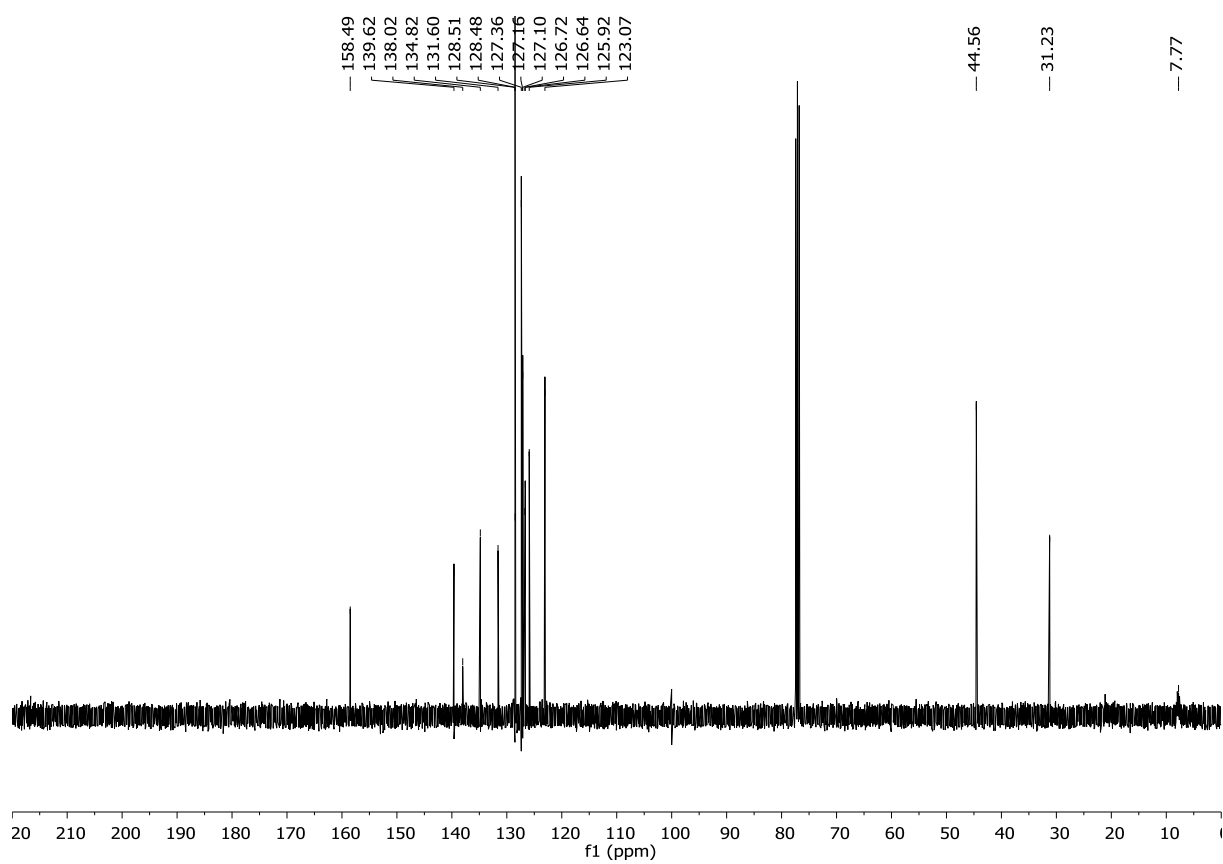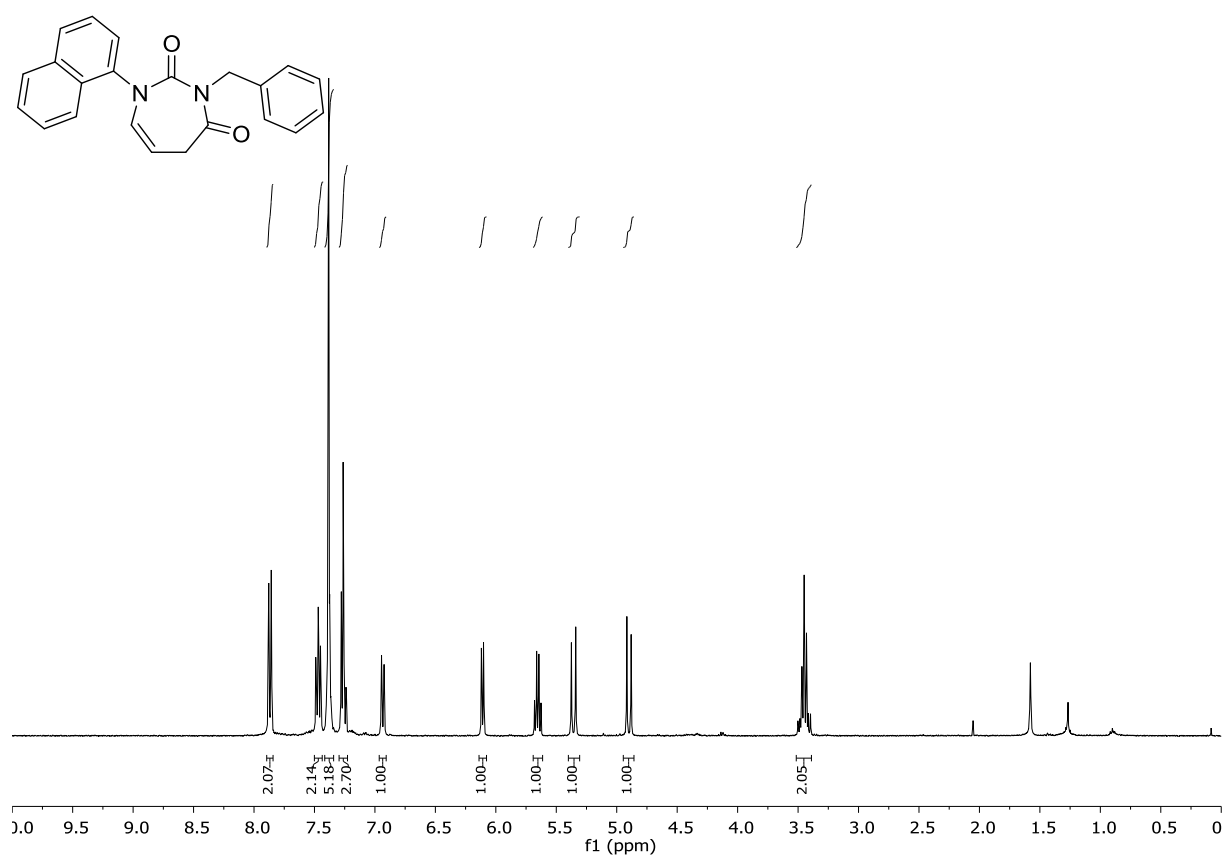

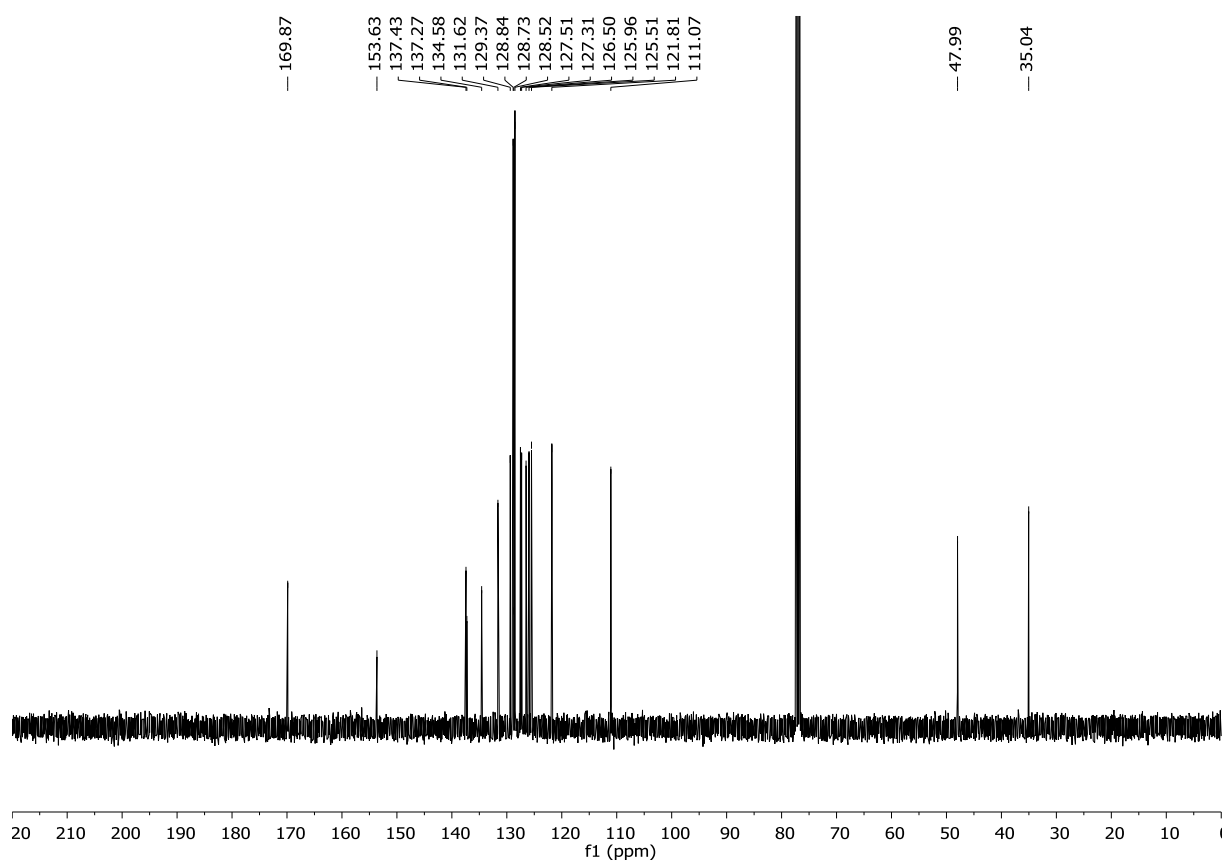

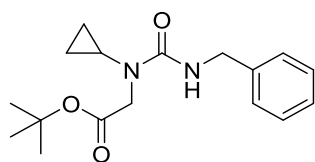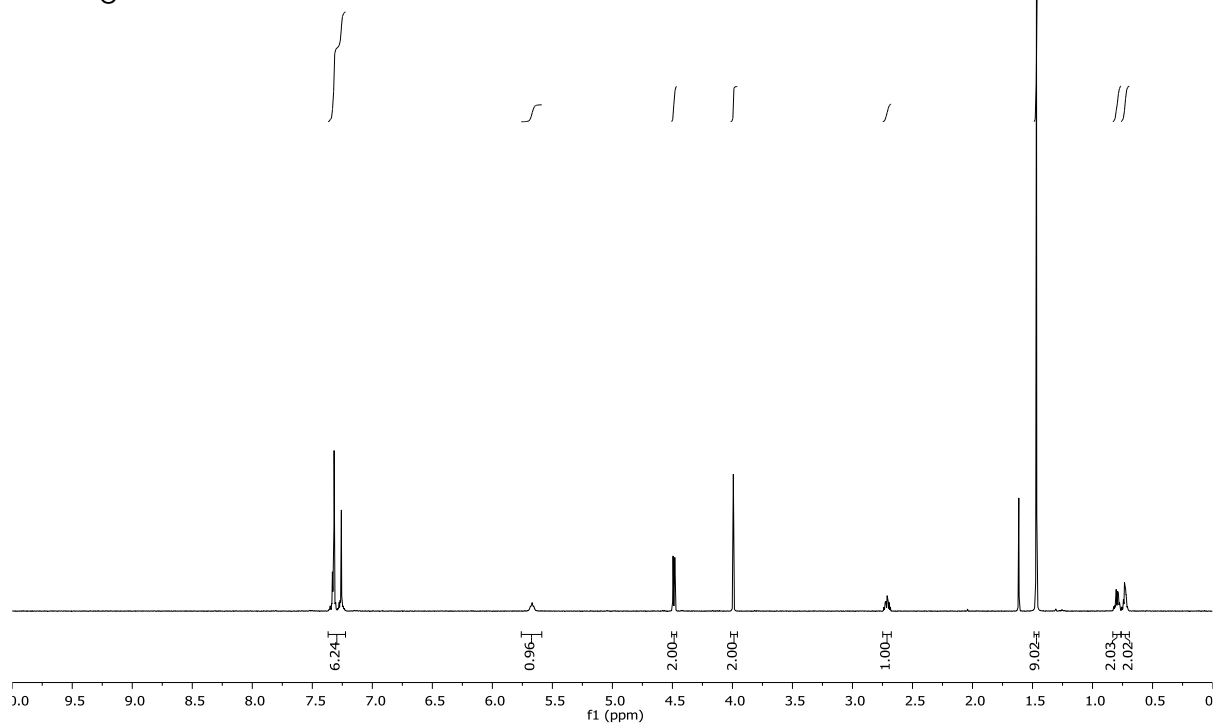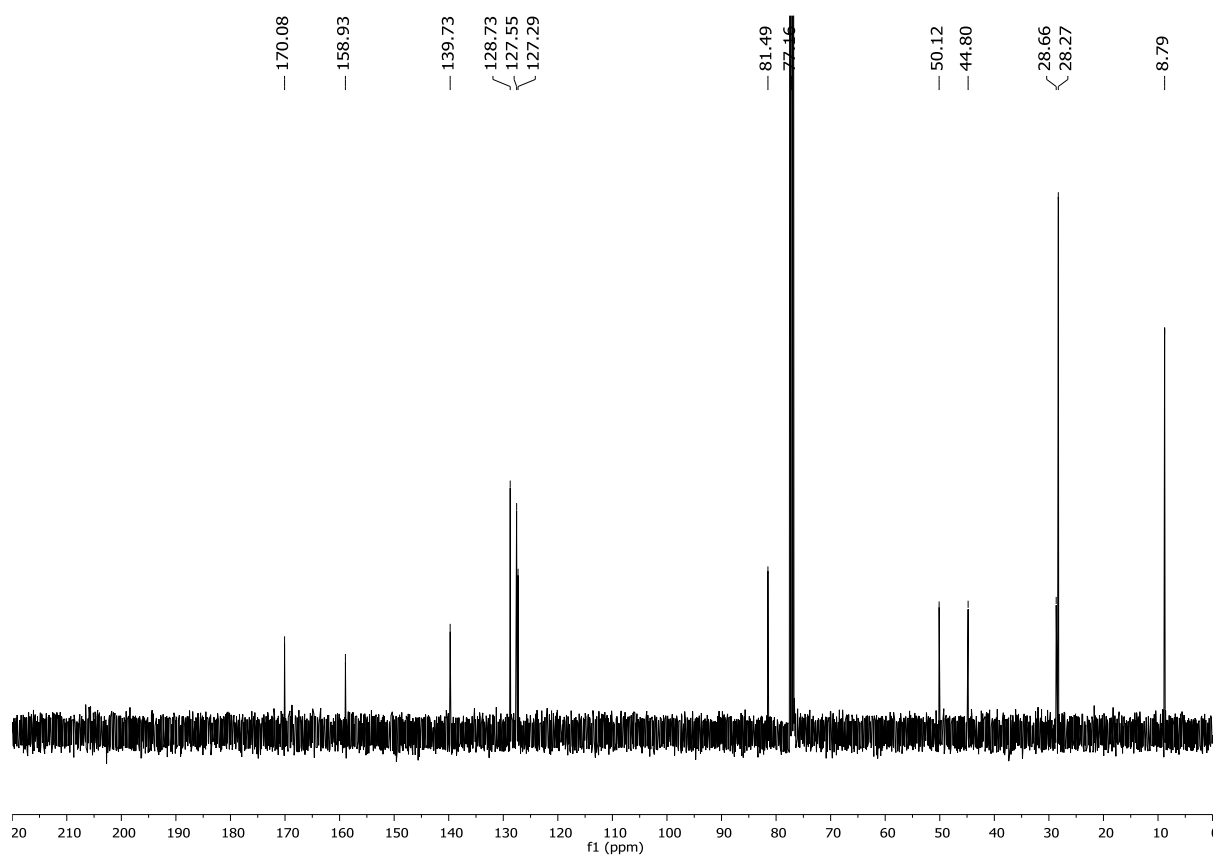

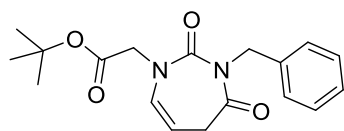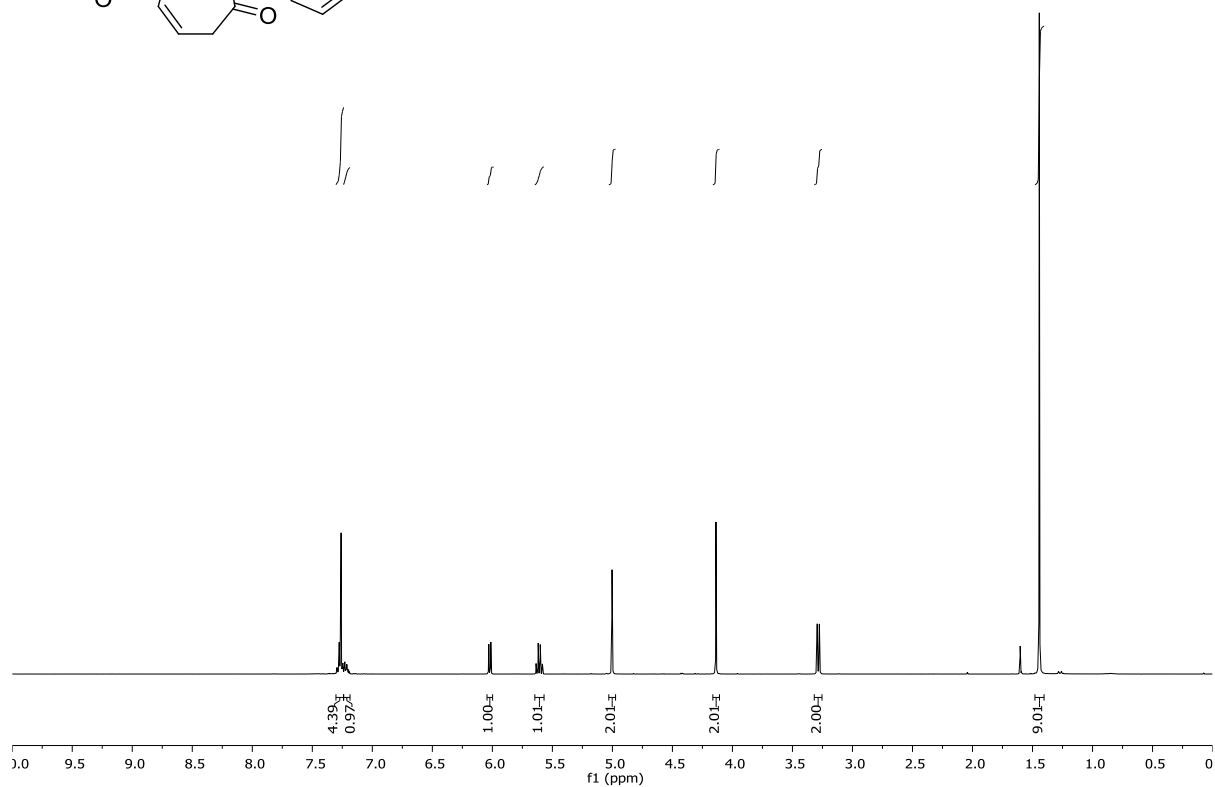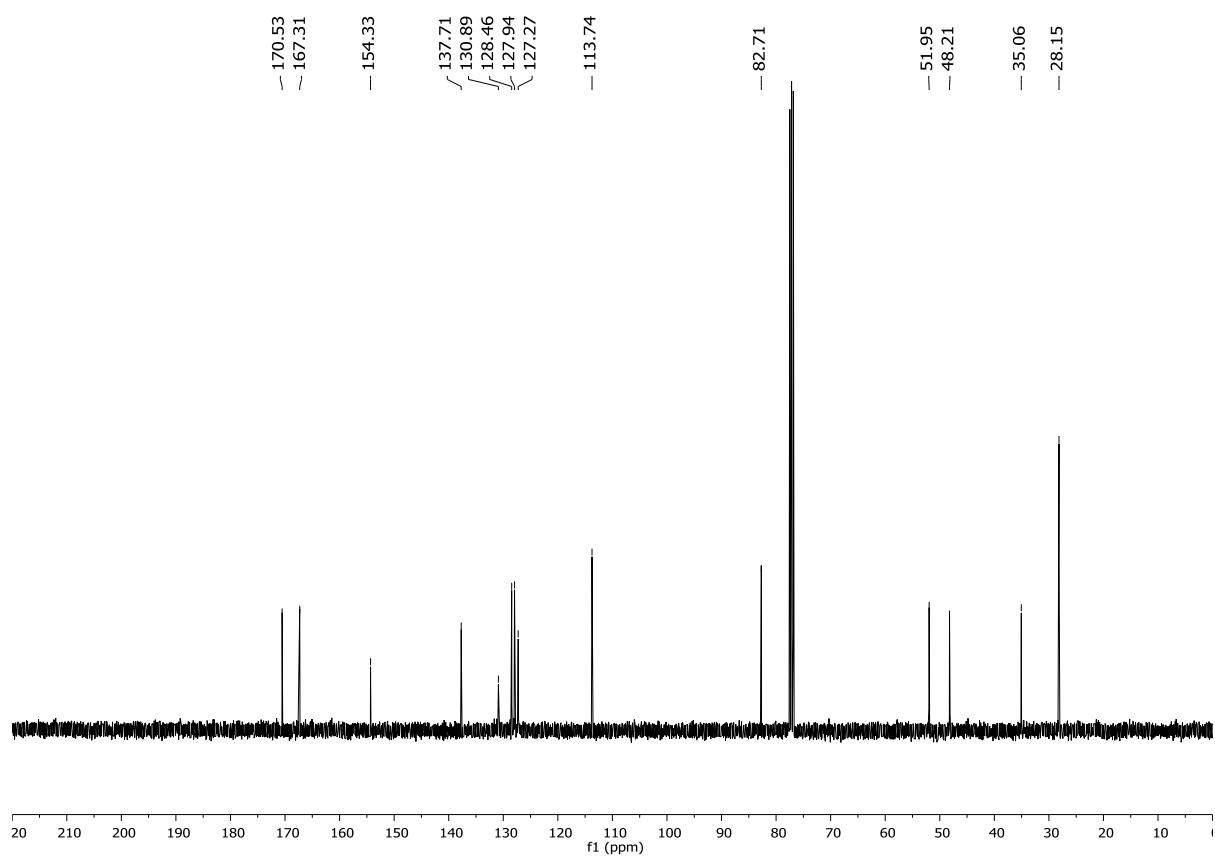

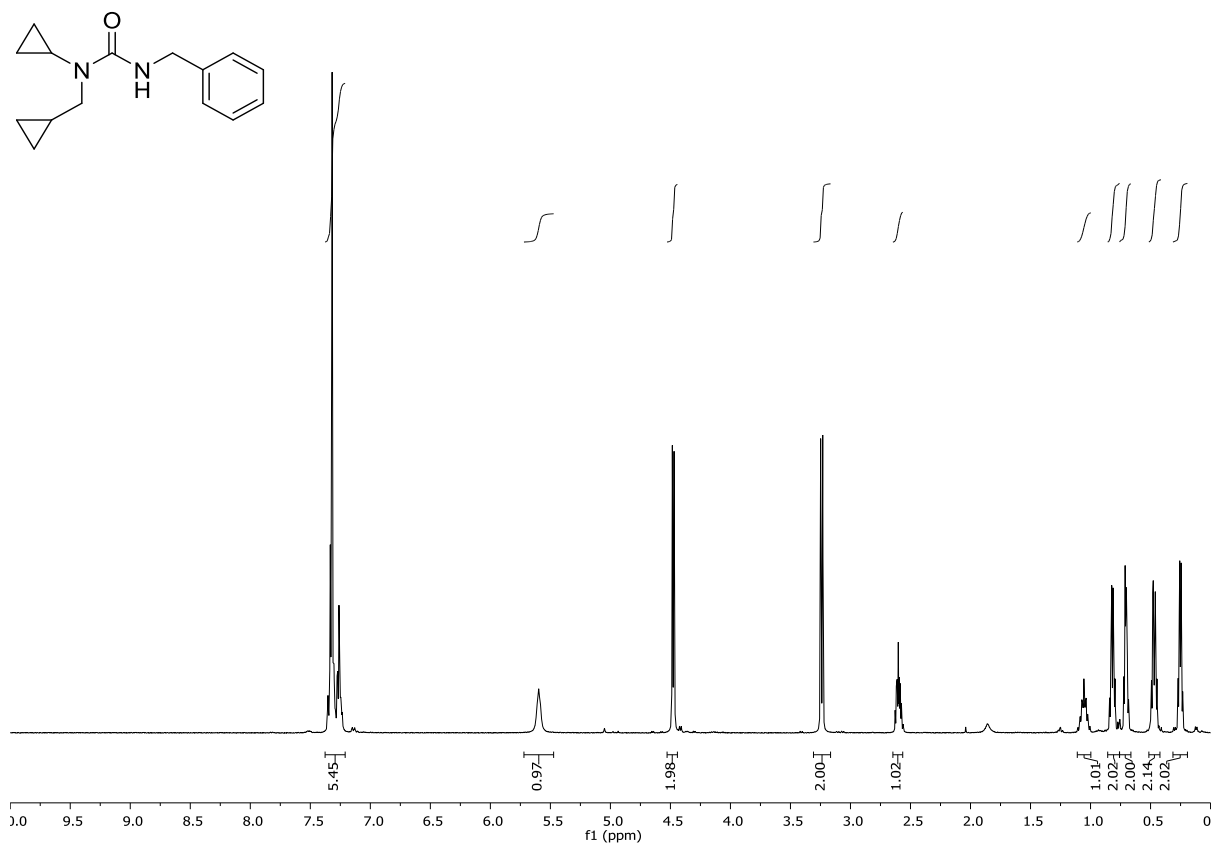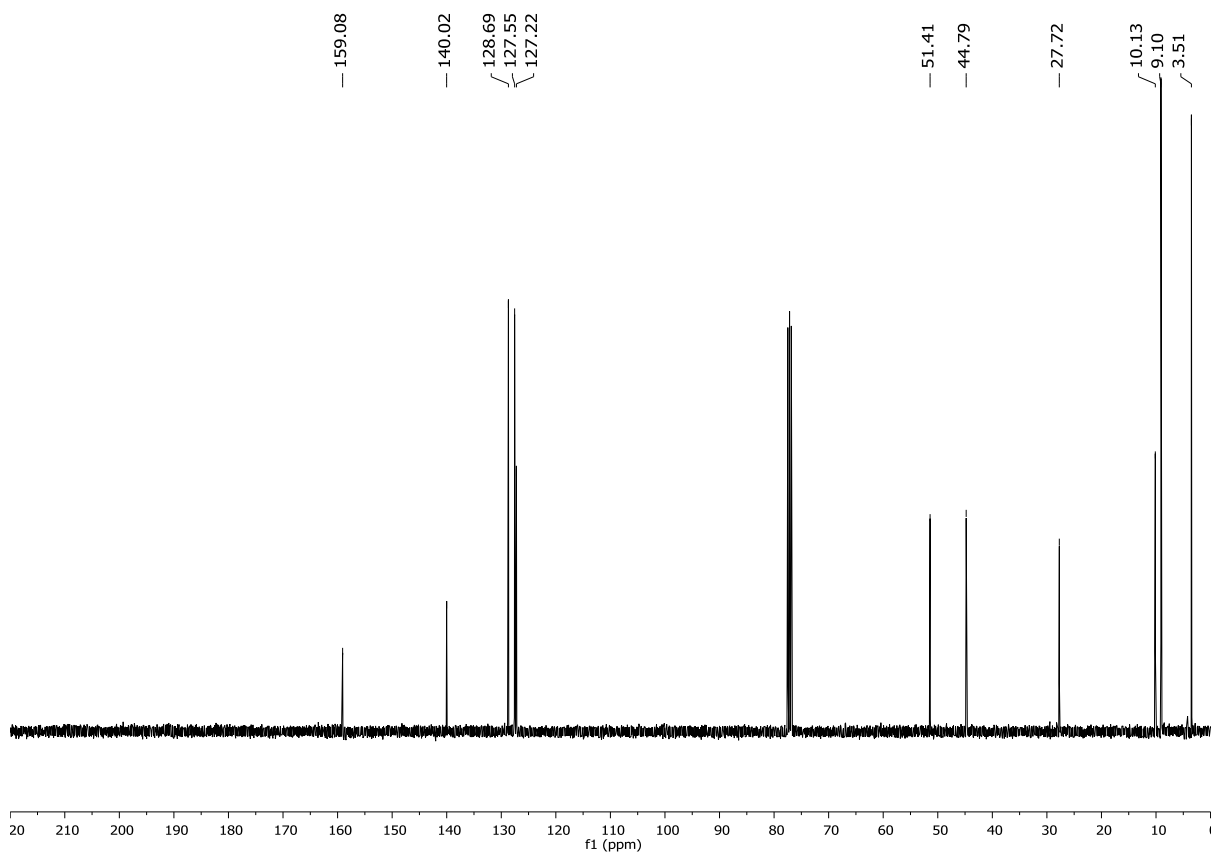



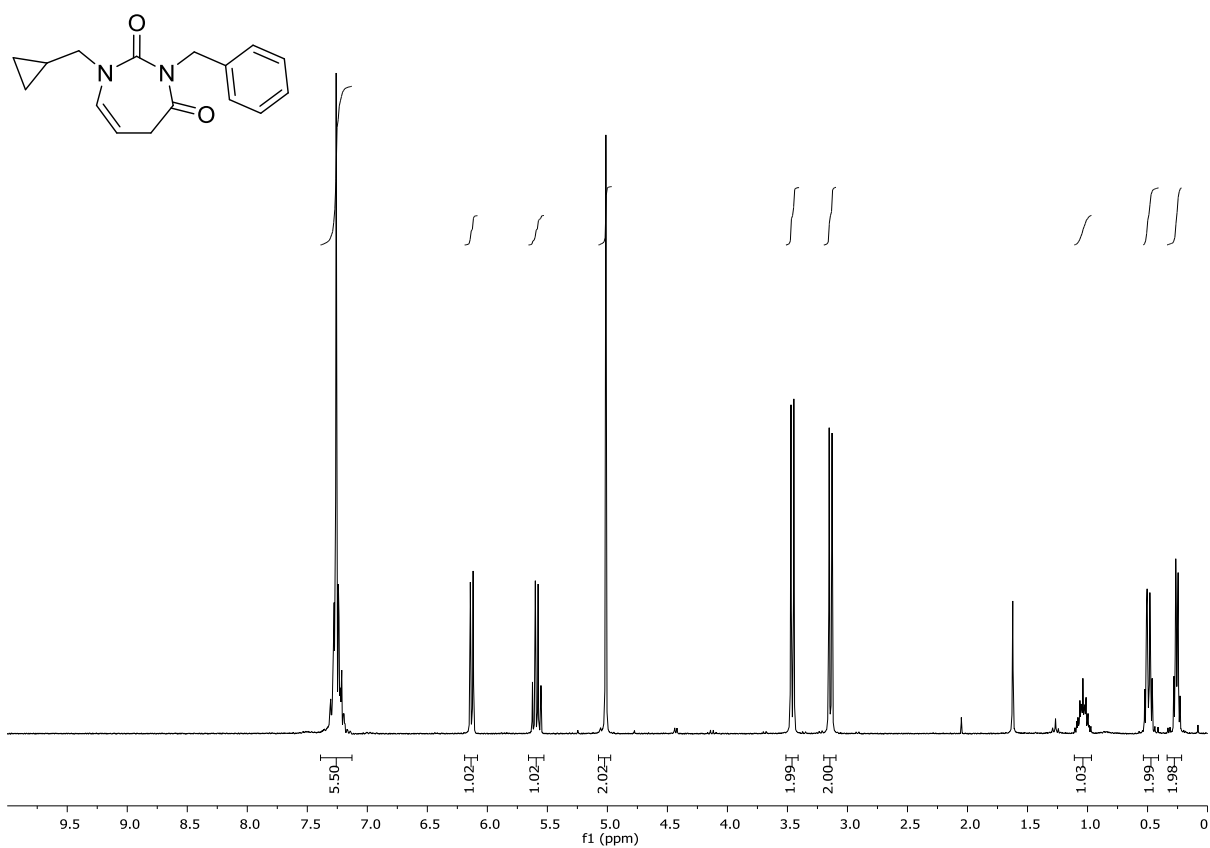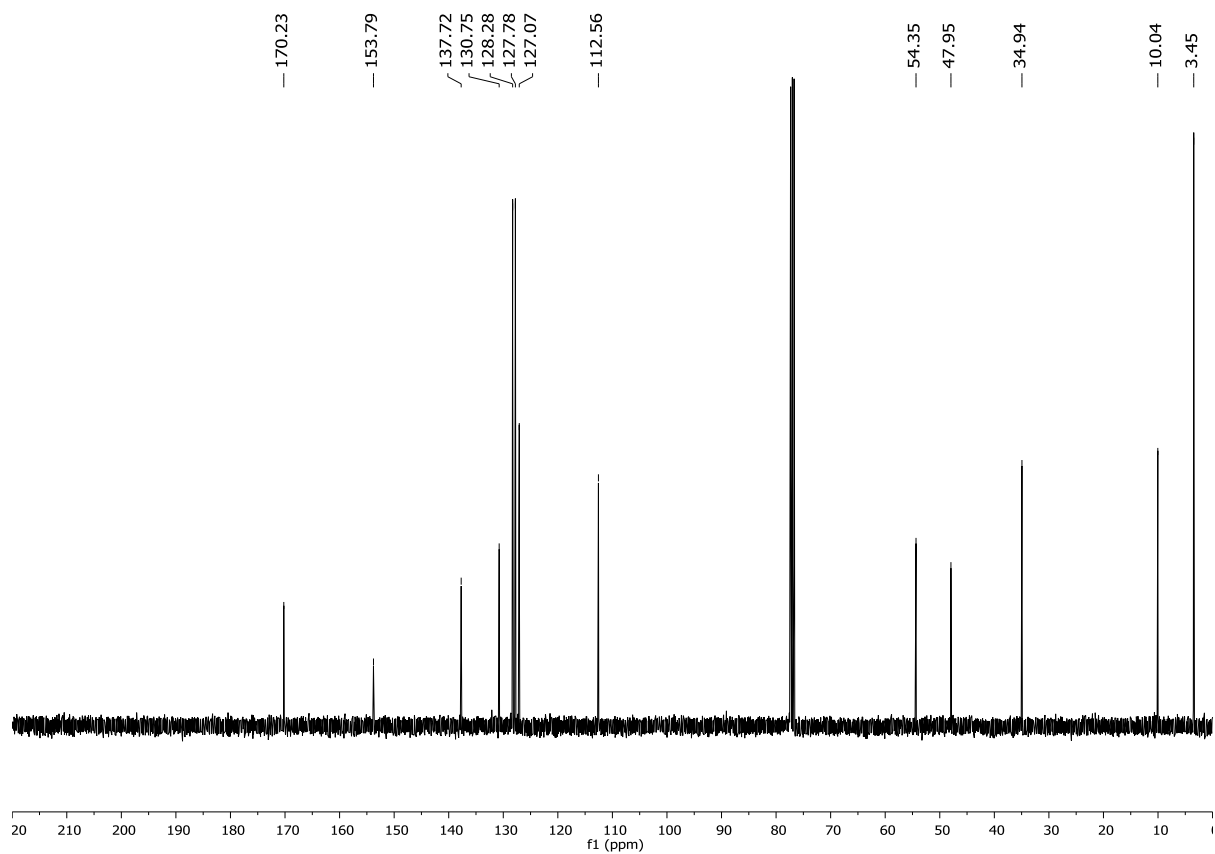

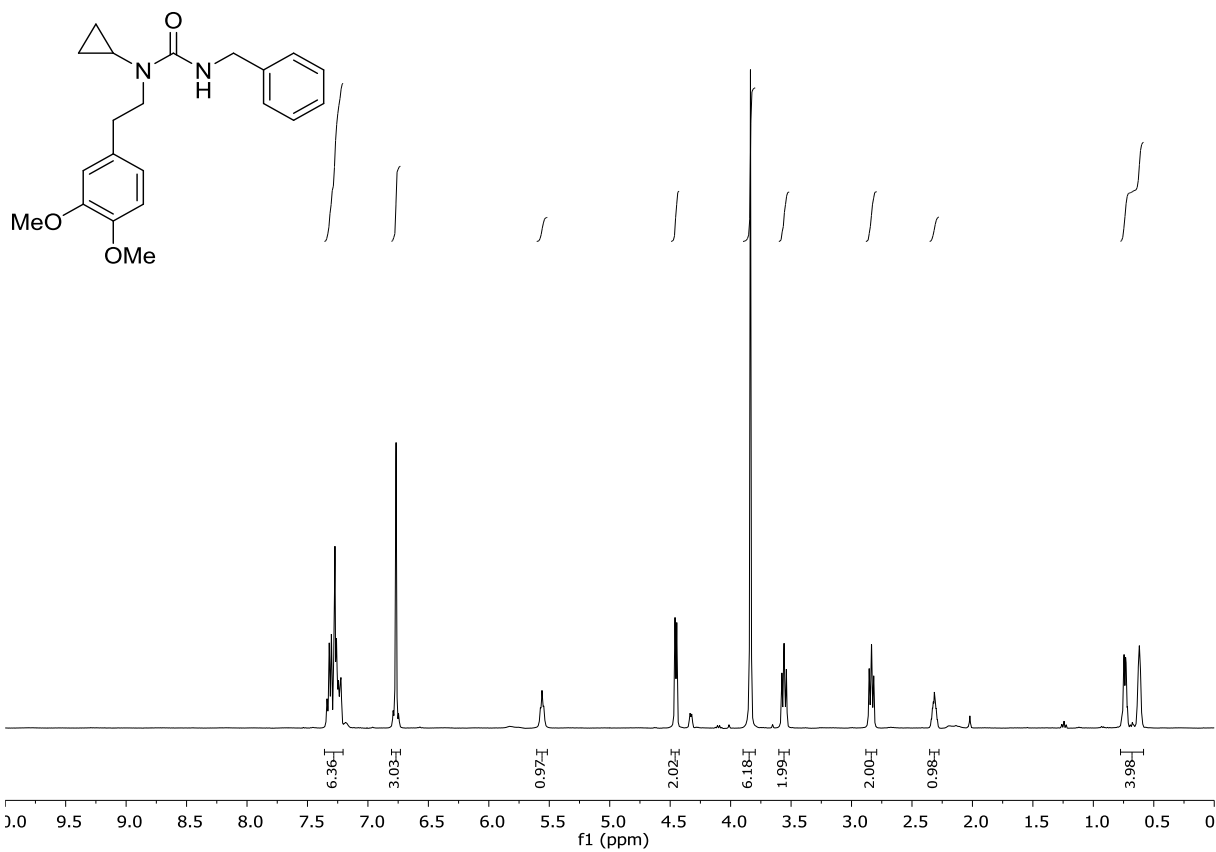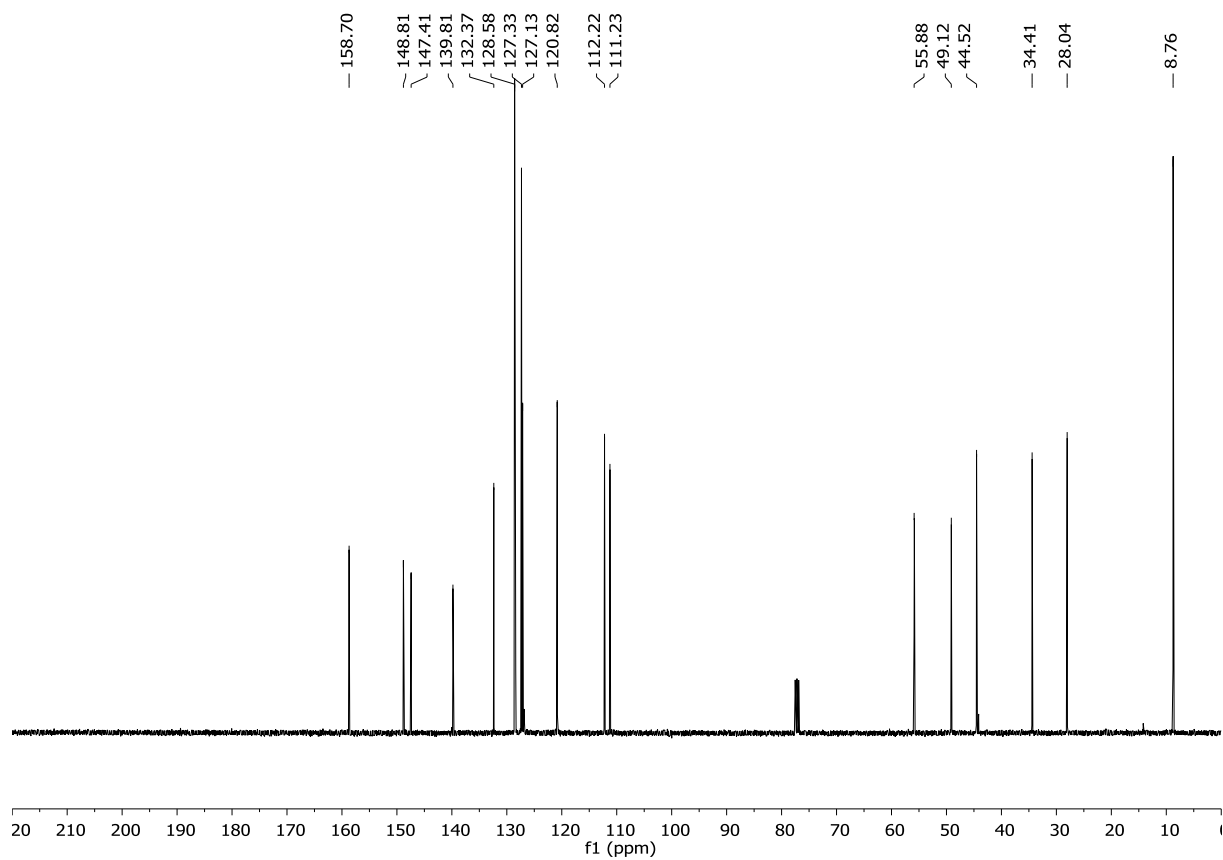

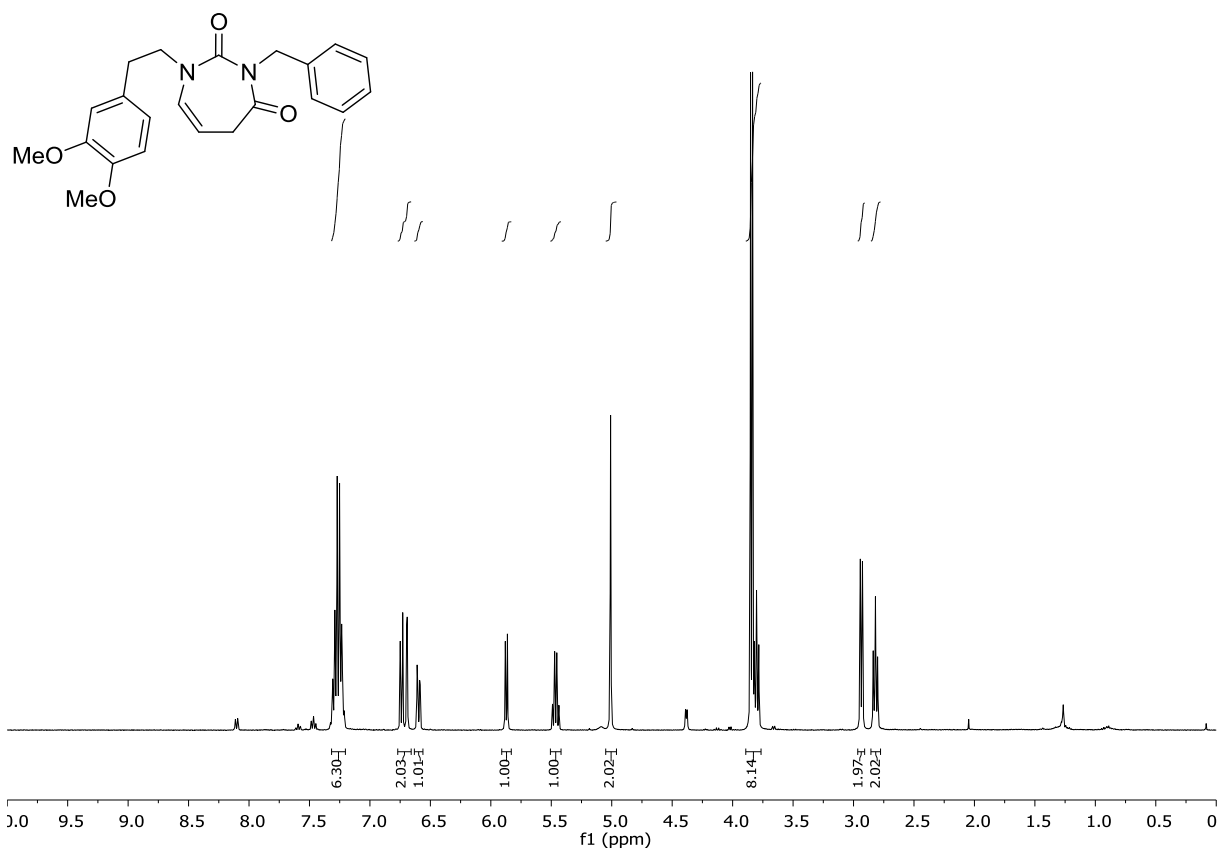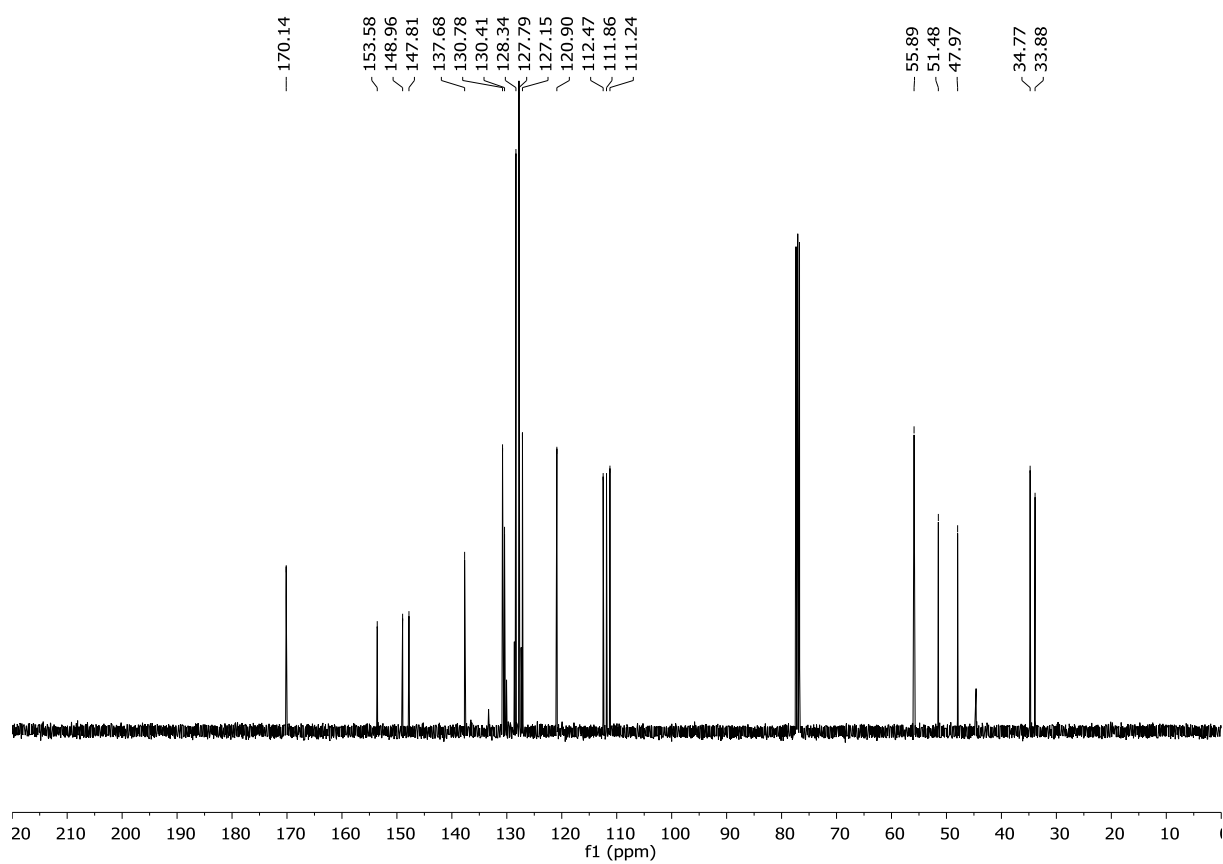

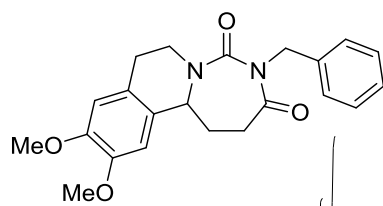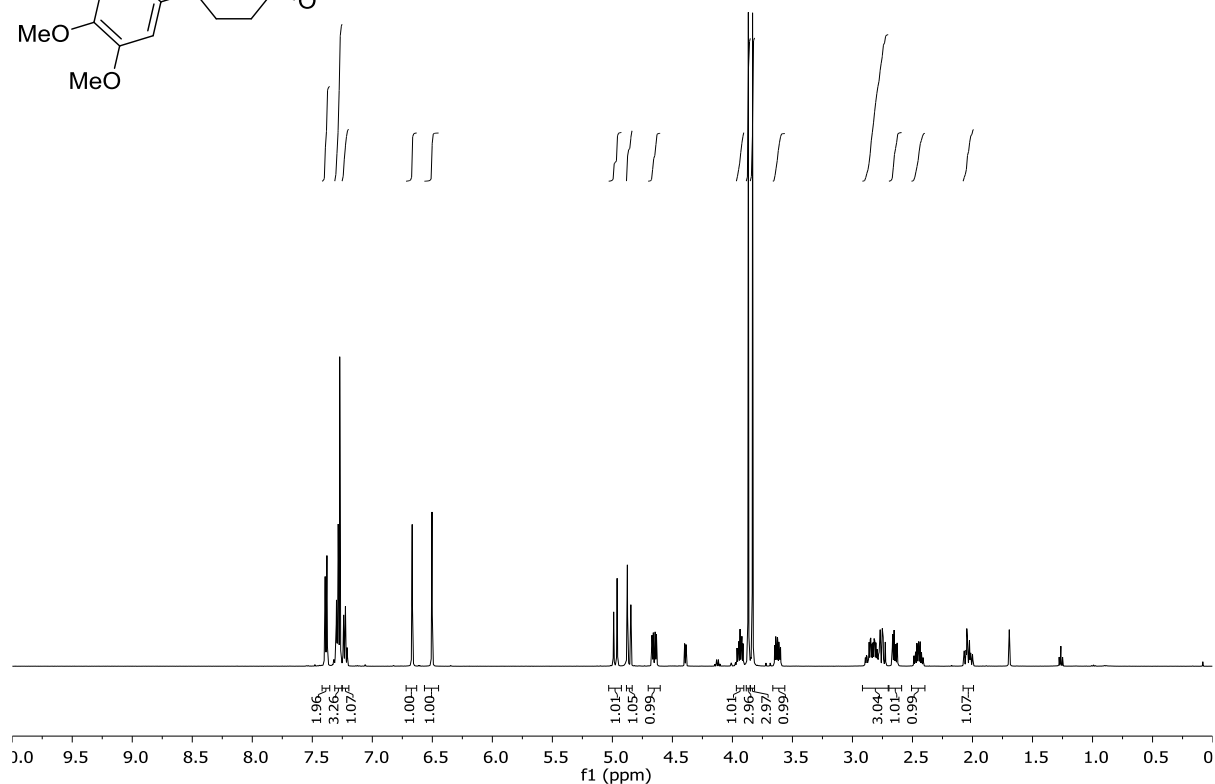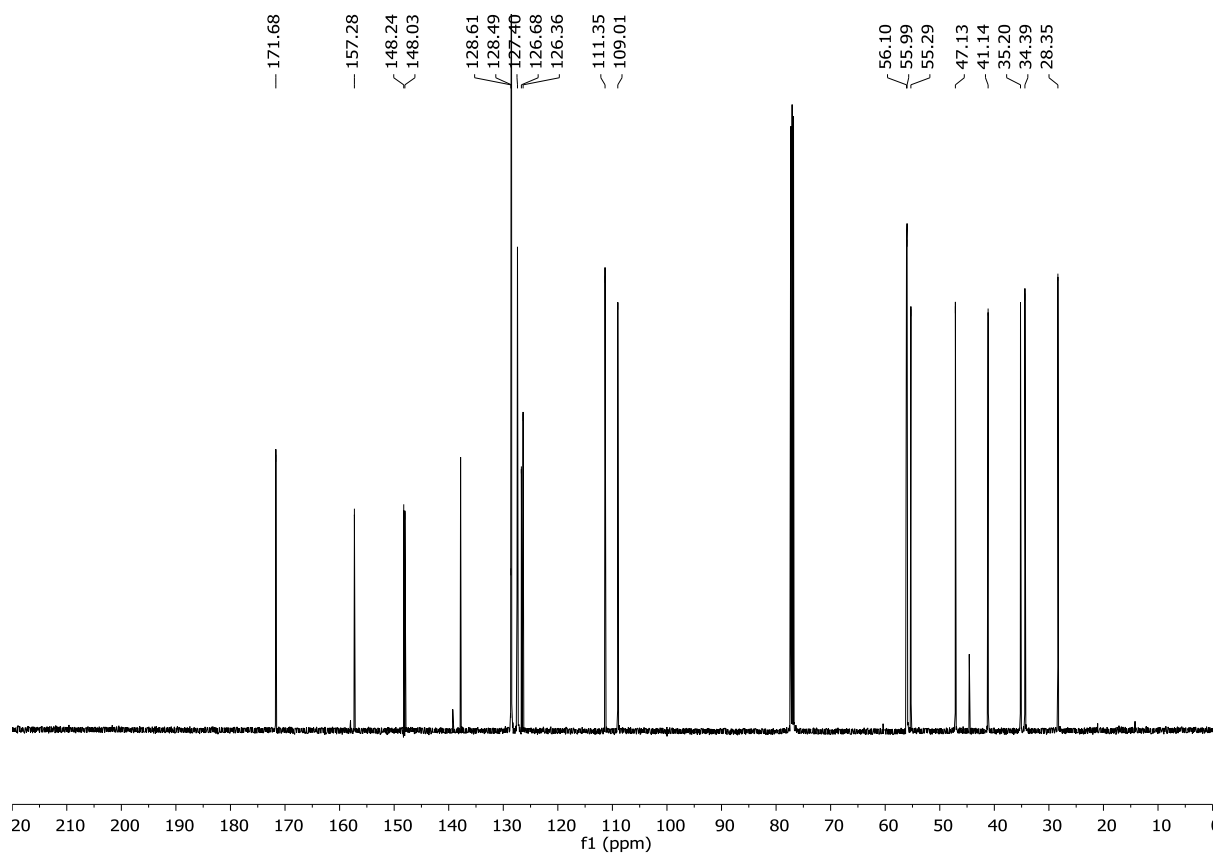

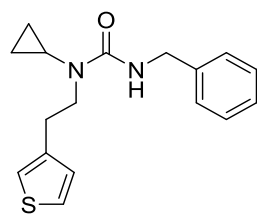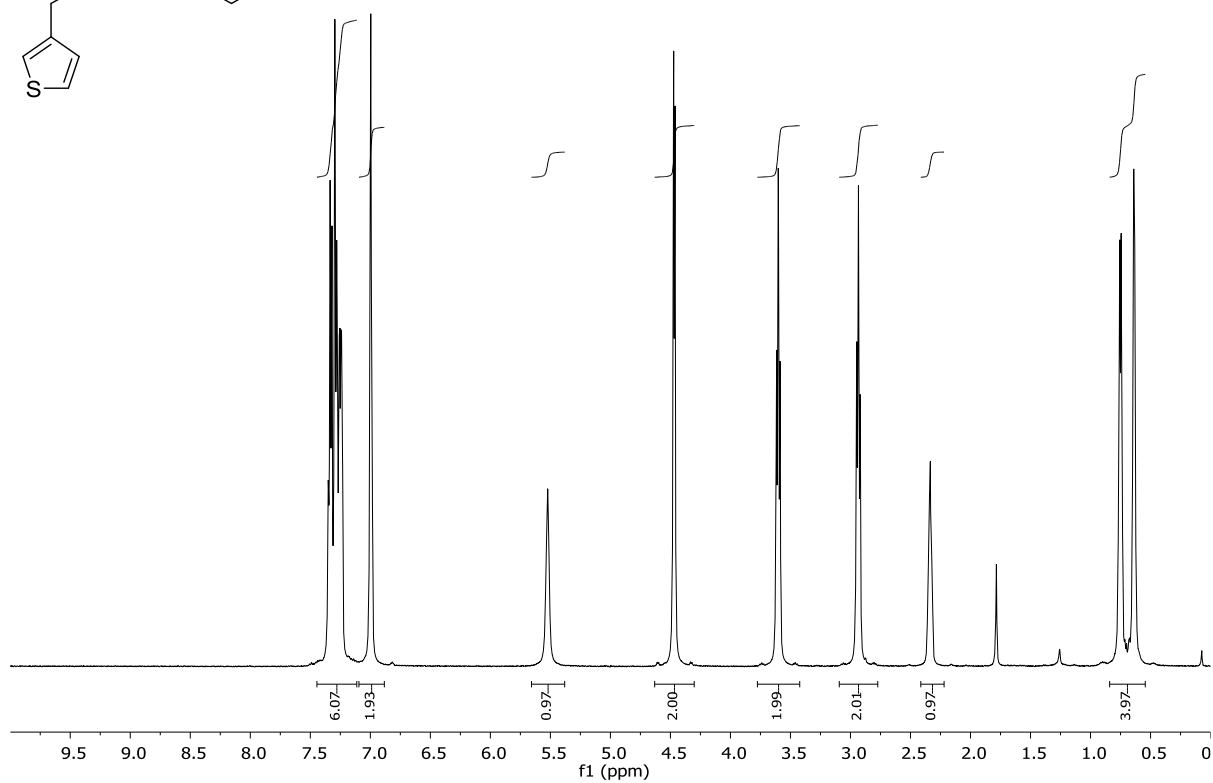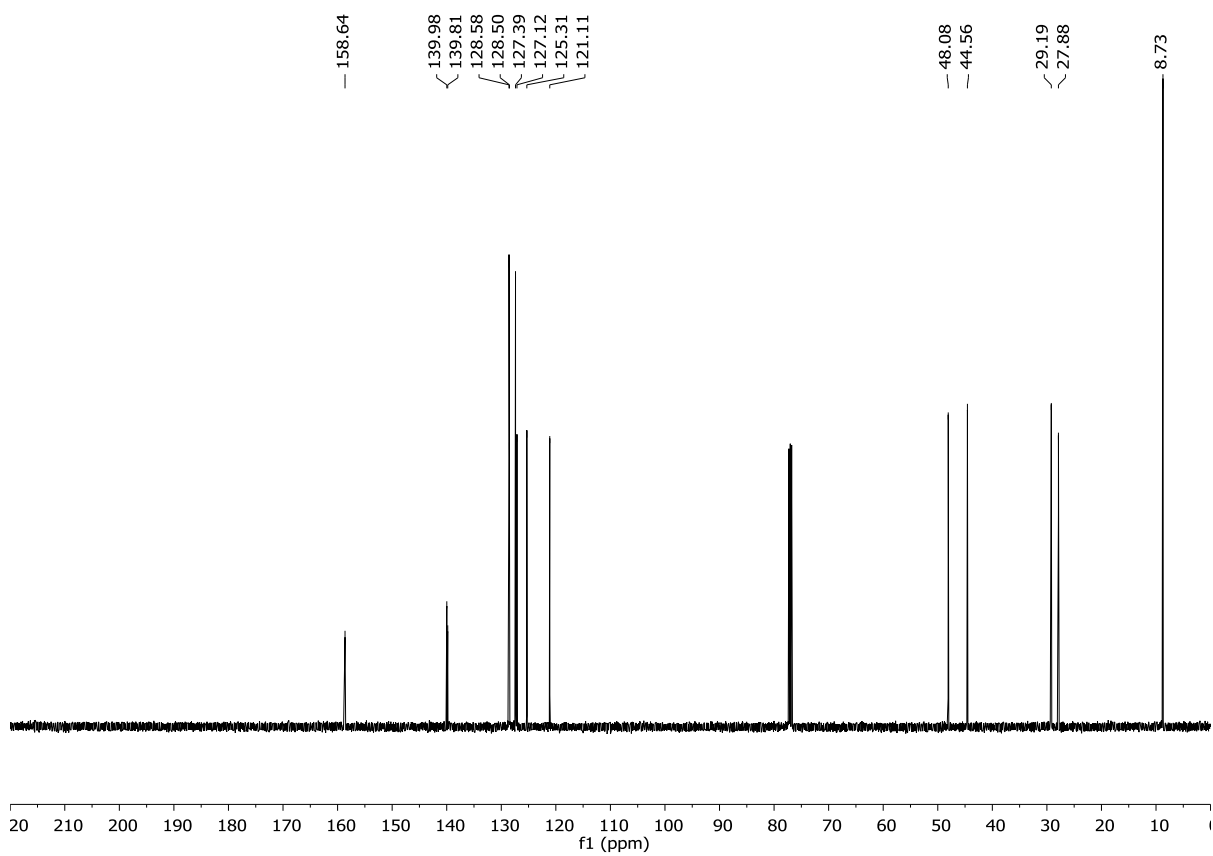

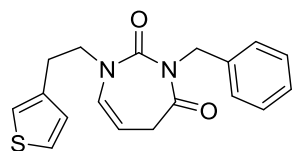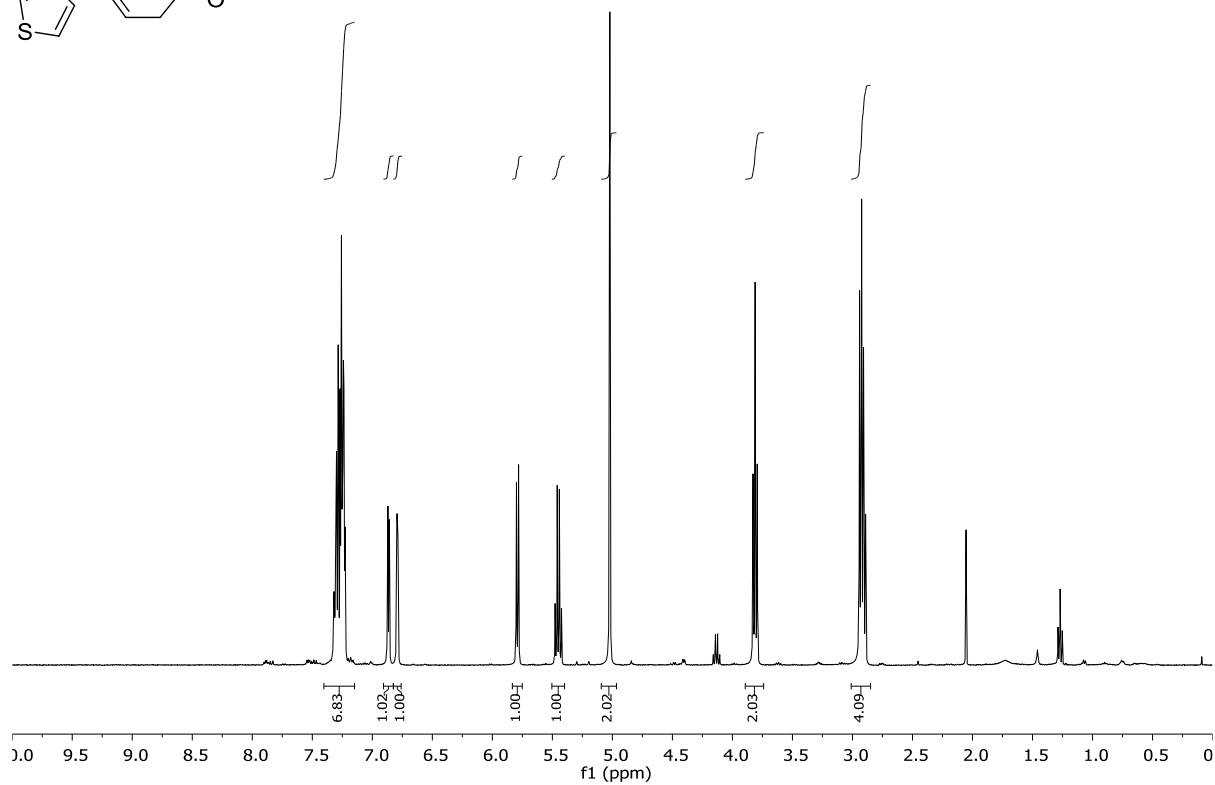

— 170.12  
 — 153.53  
 138.15  
 137.68  
 130.72  
 128.38  
 127.99  
 127.90  
 127.21  
 125.96  
 121.84  
 — 112.47  
 ~ 50.71  
 ~ 47.85  
 — 34.71  
 — 28.62

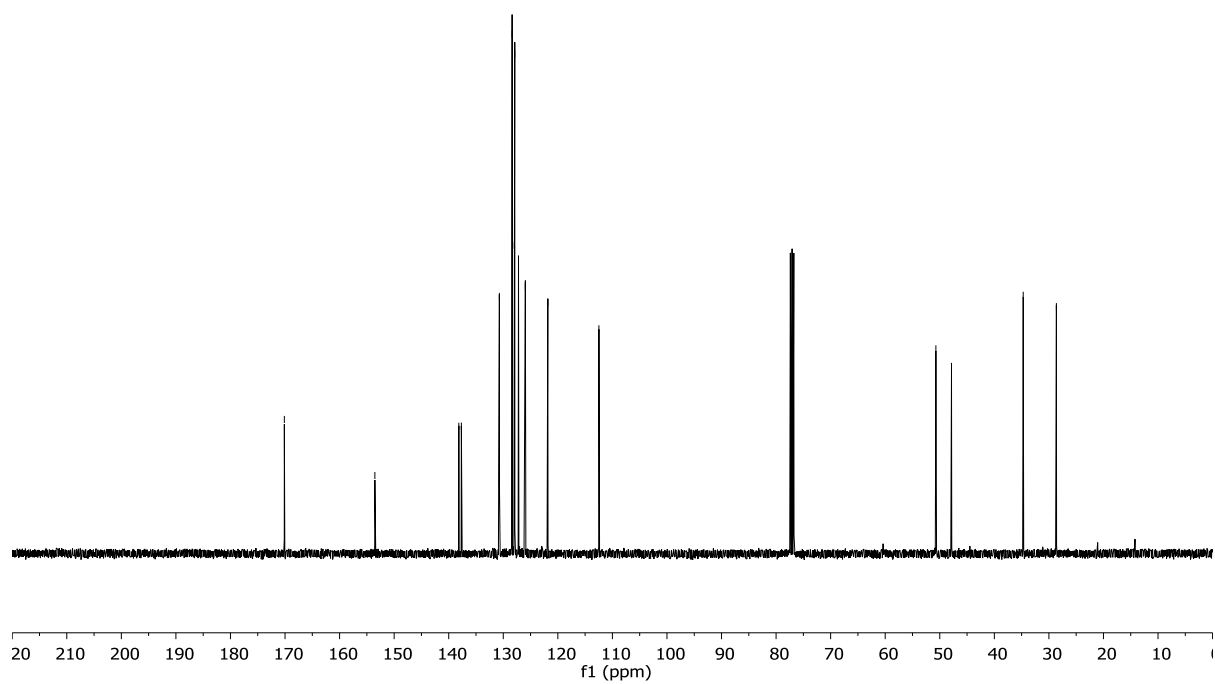

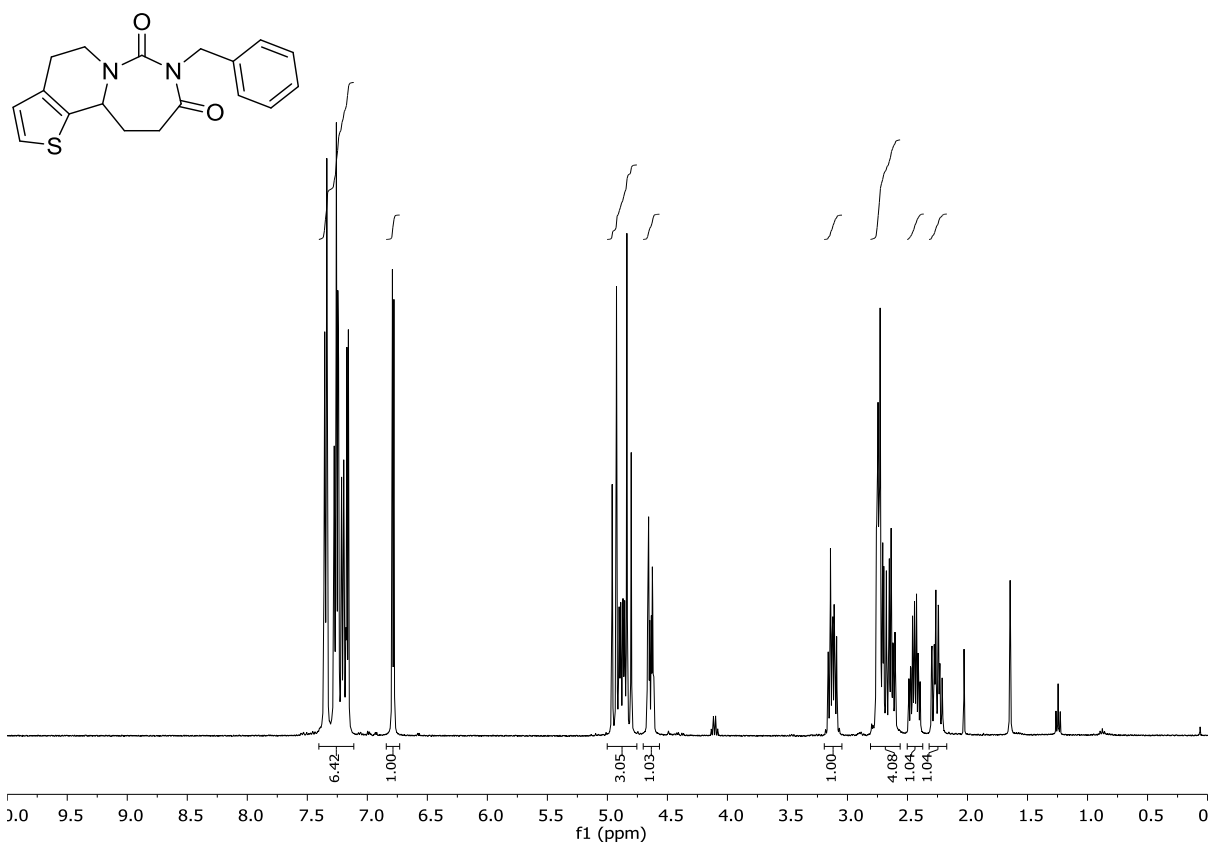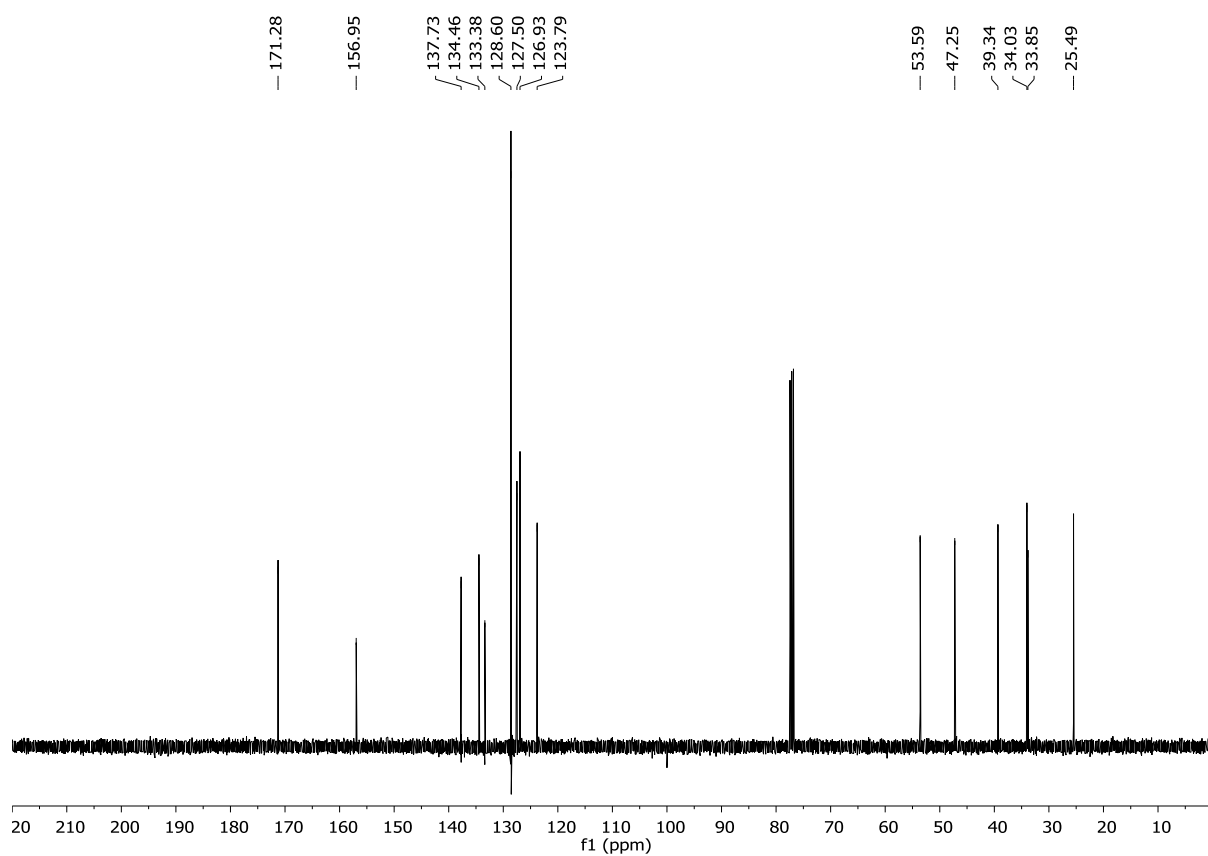

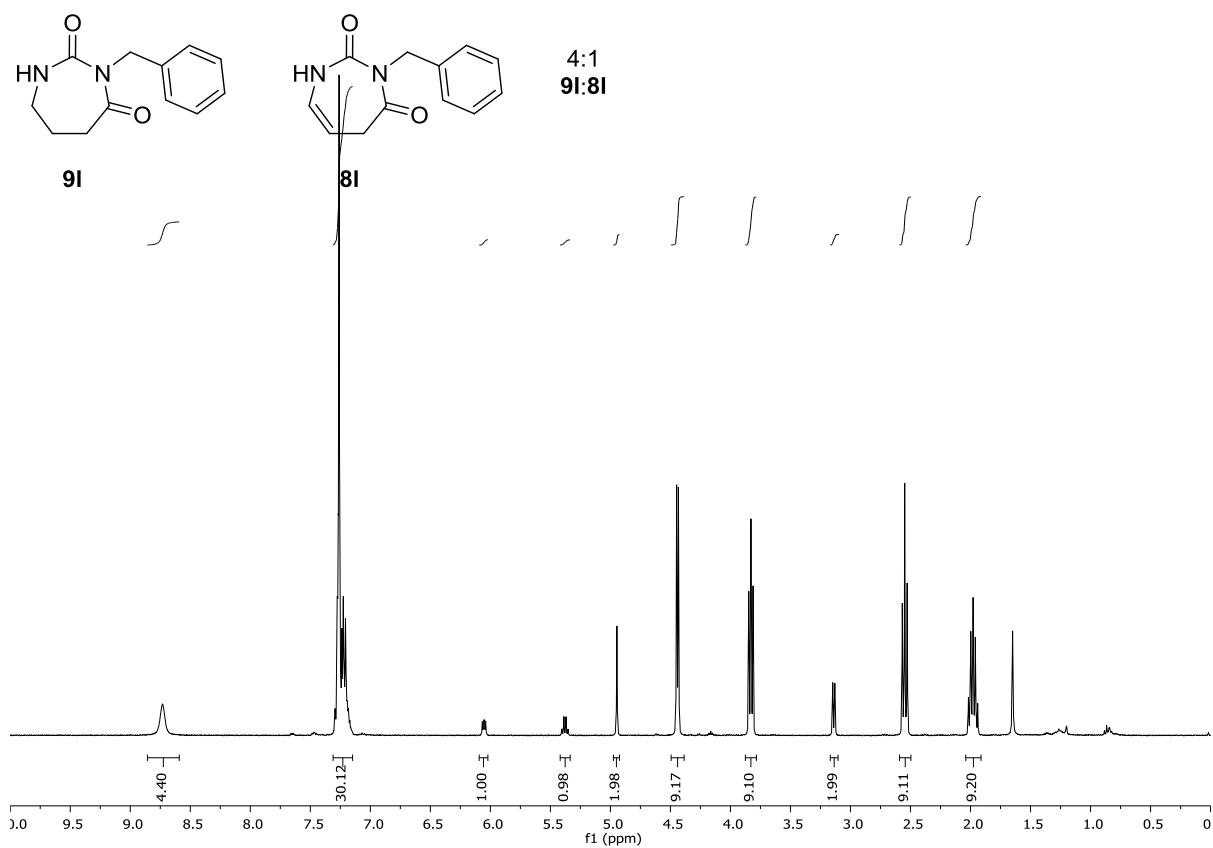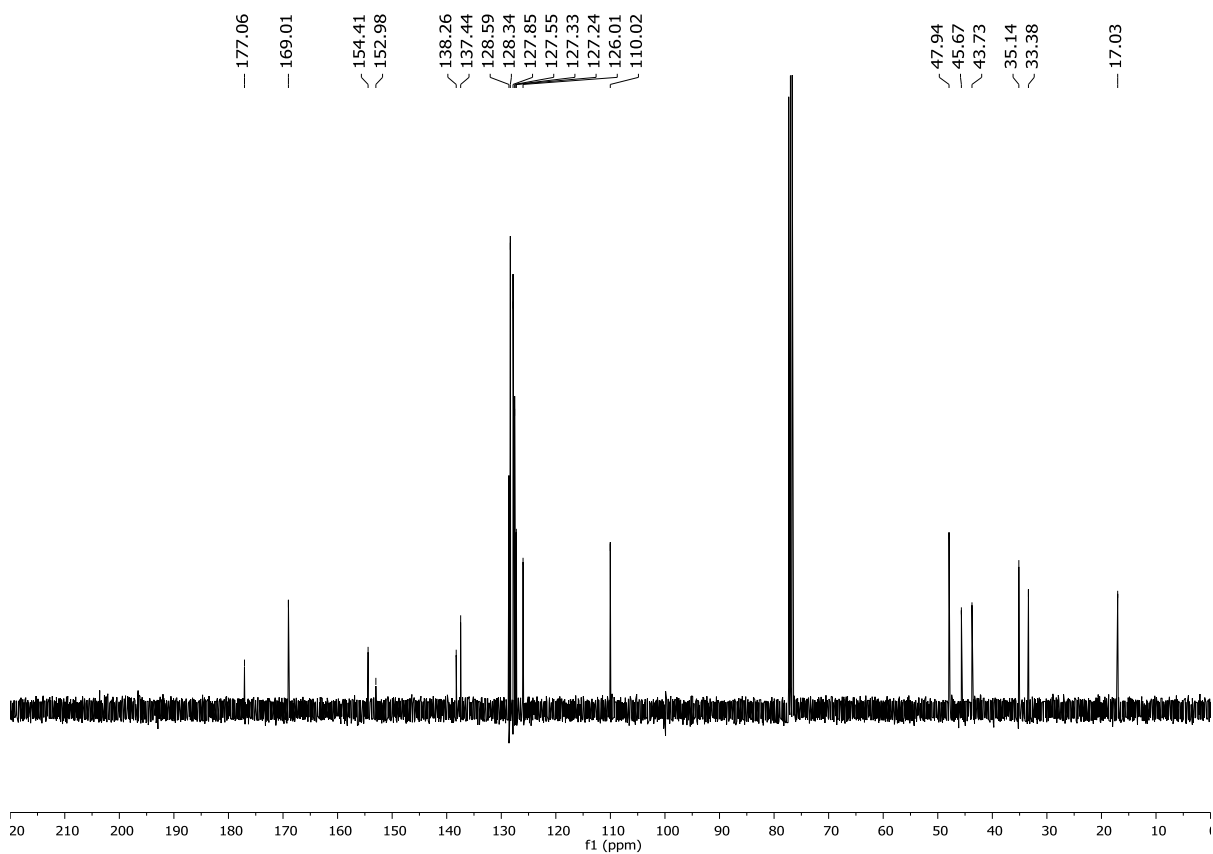



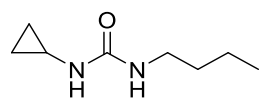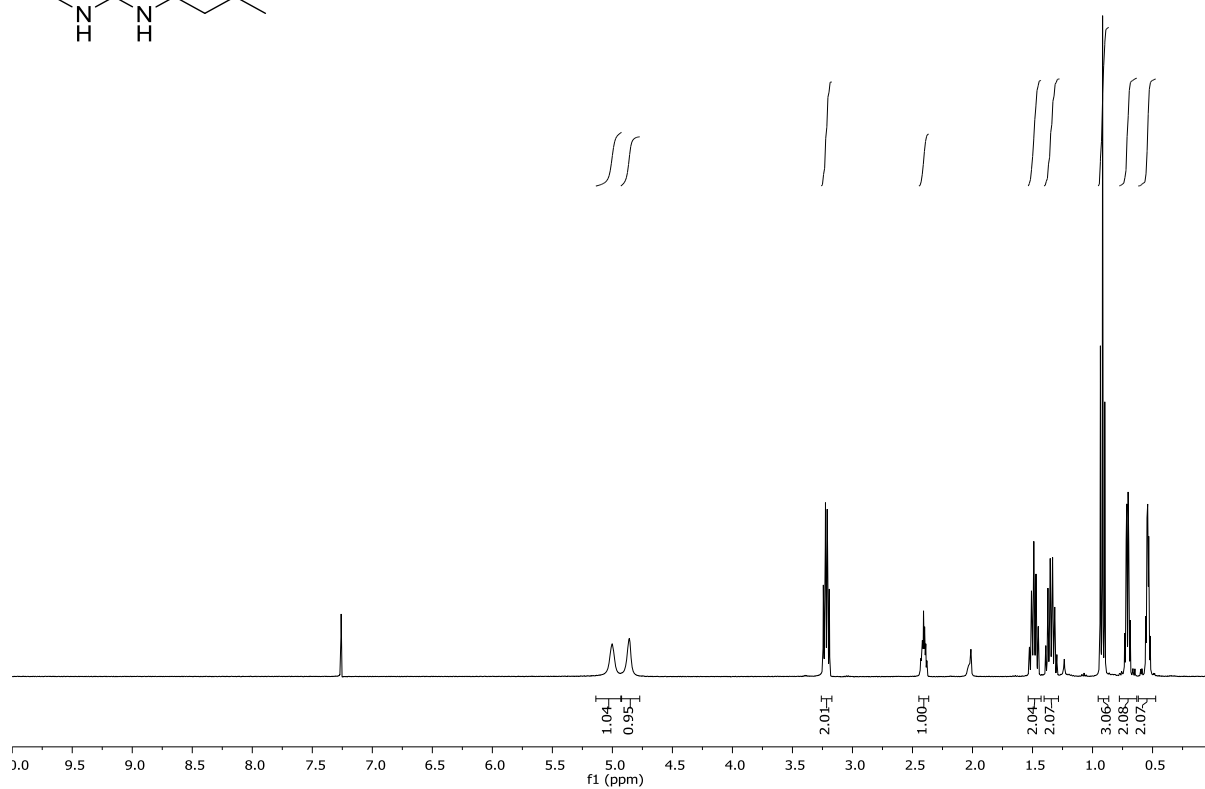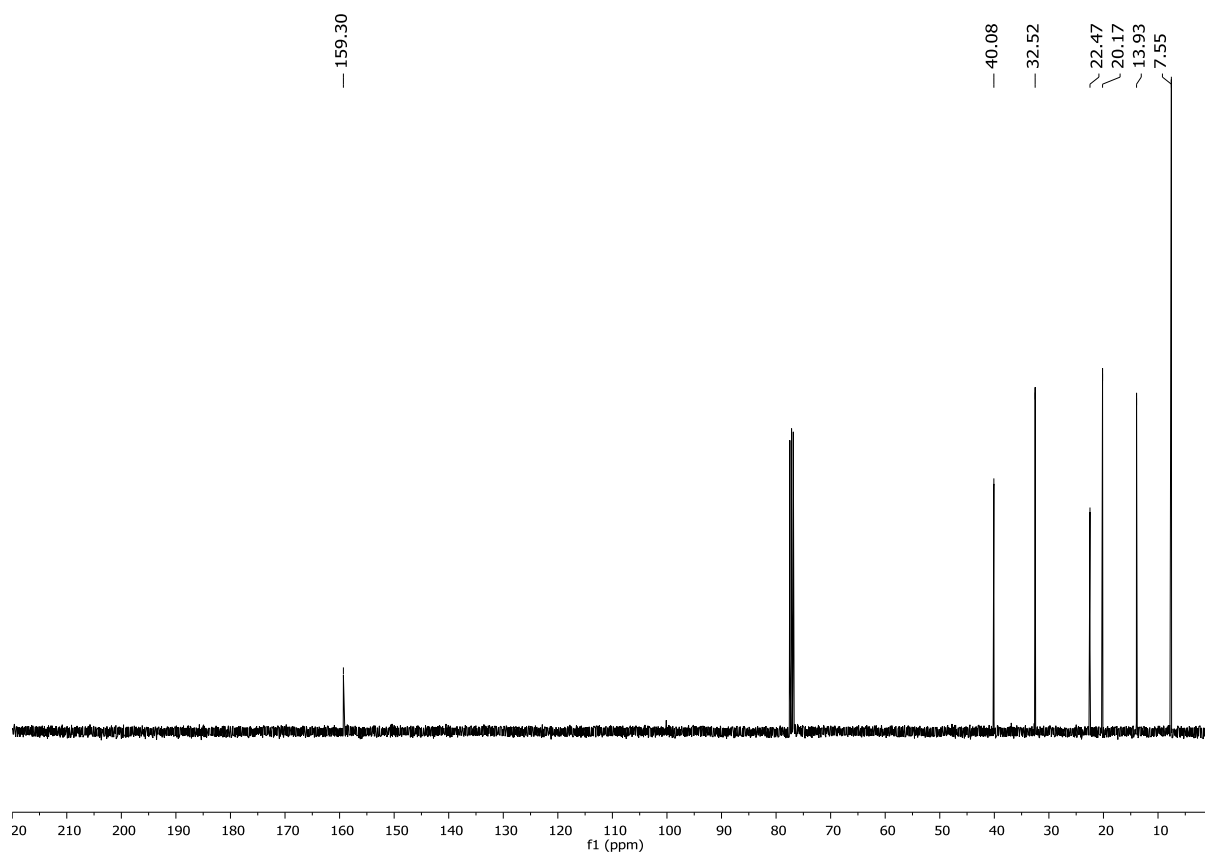

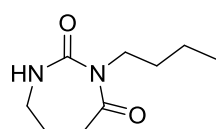

9m

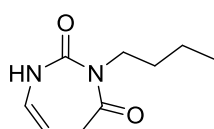

8m

5:1  
9m:8m

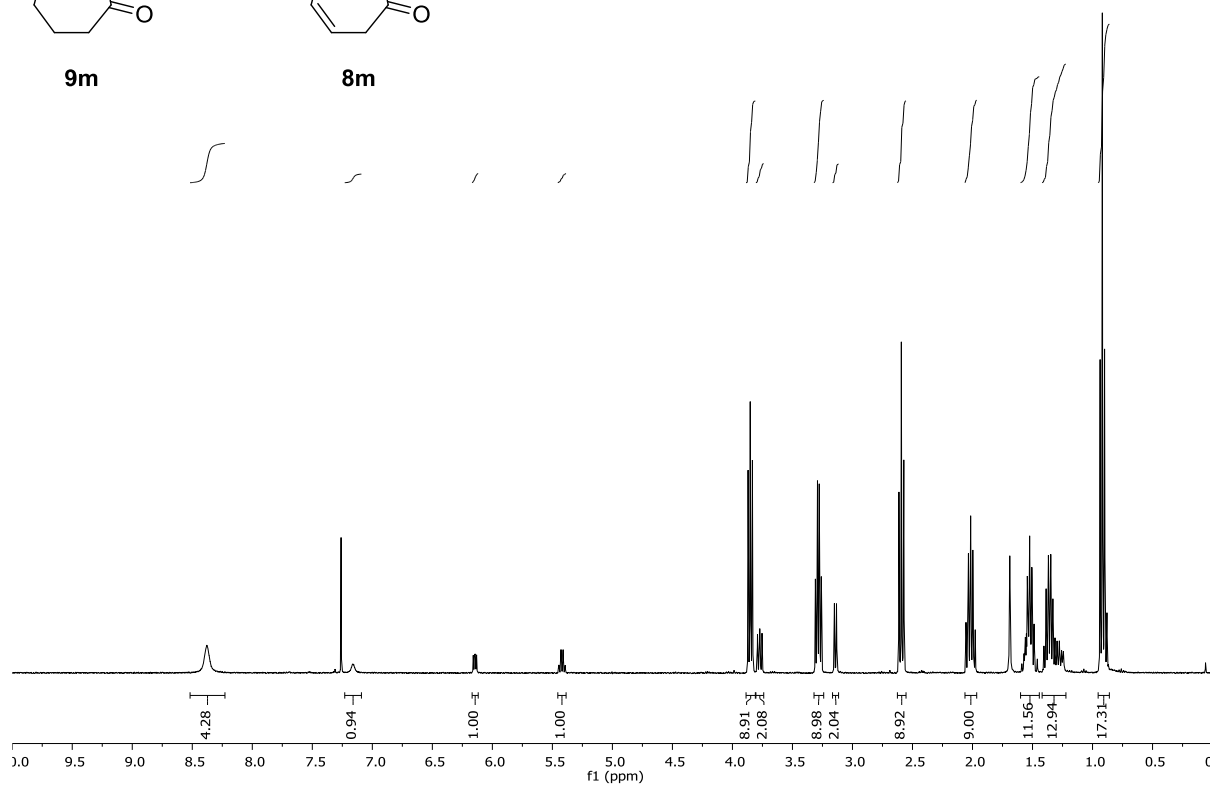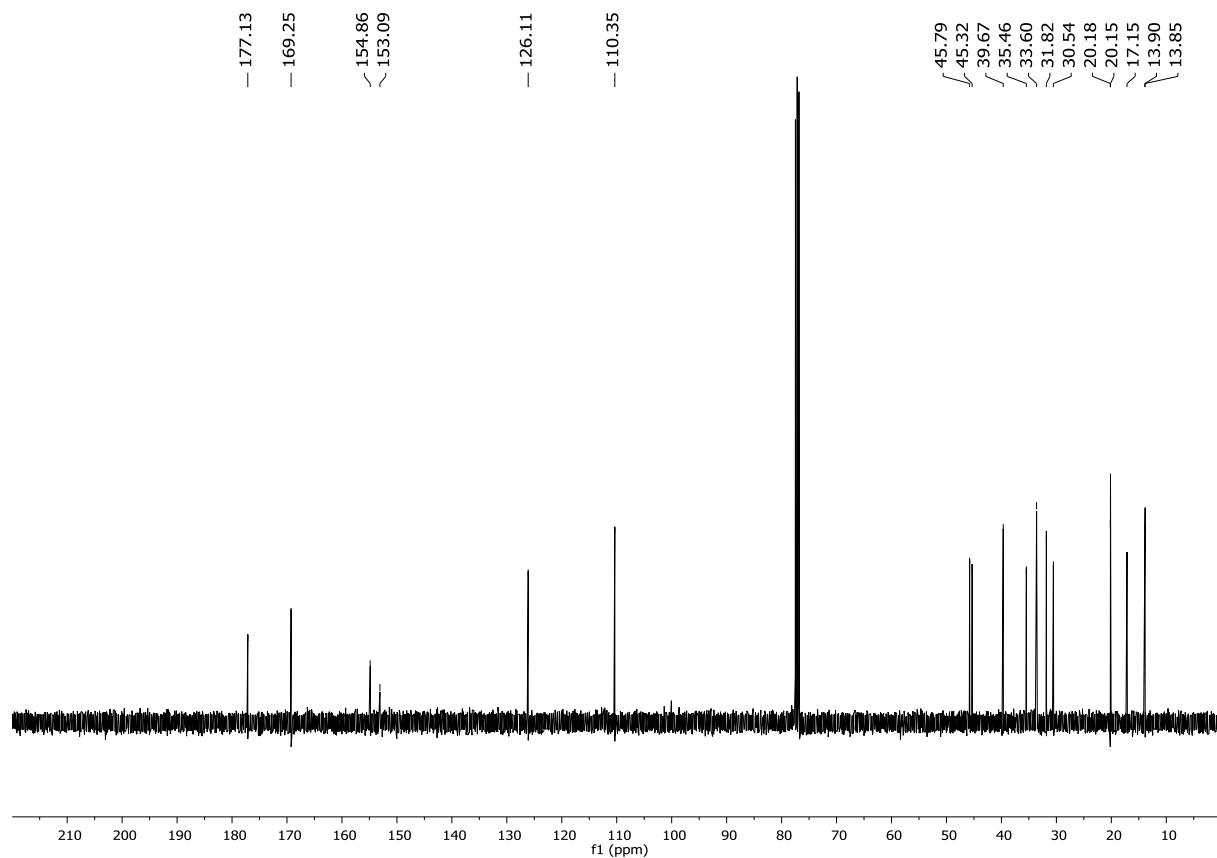

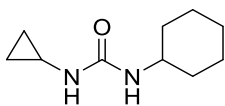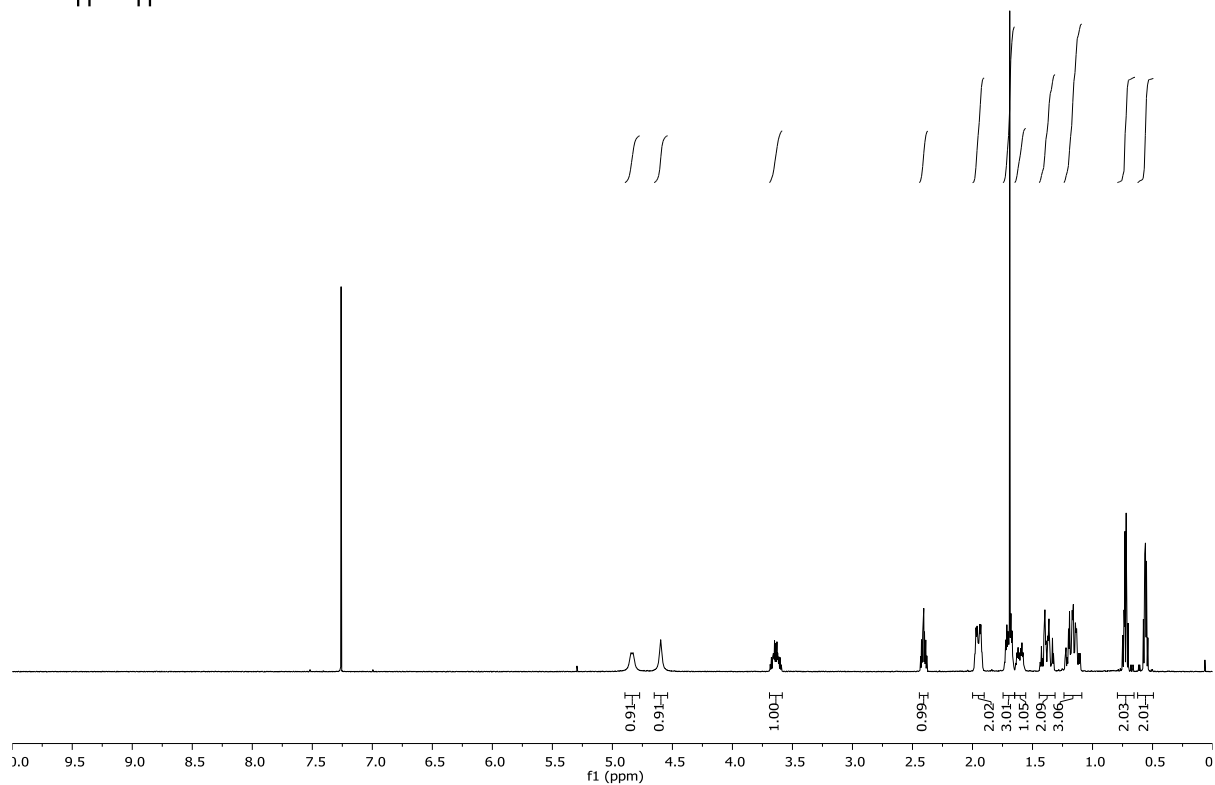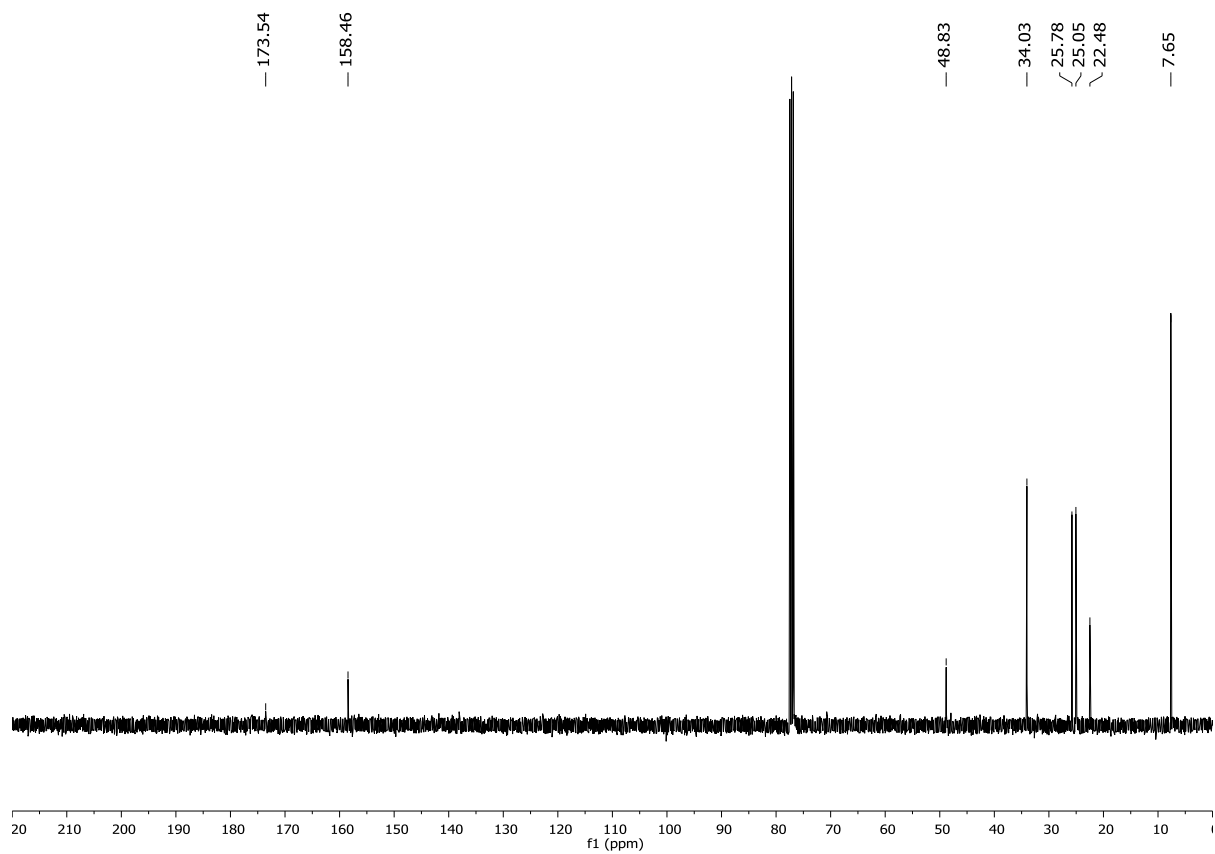

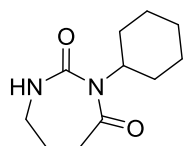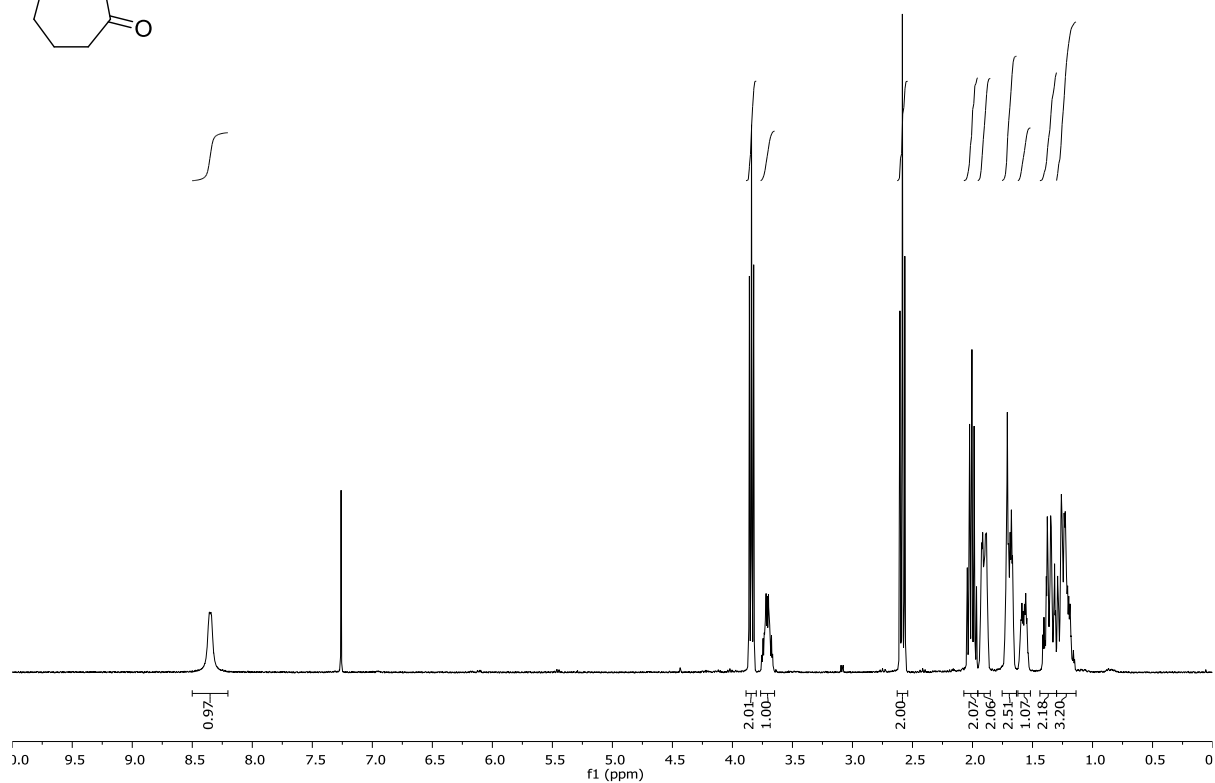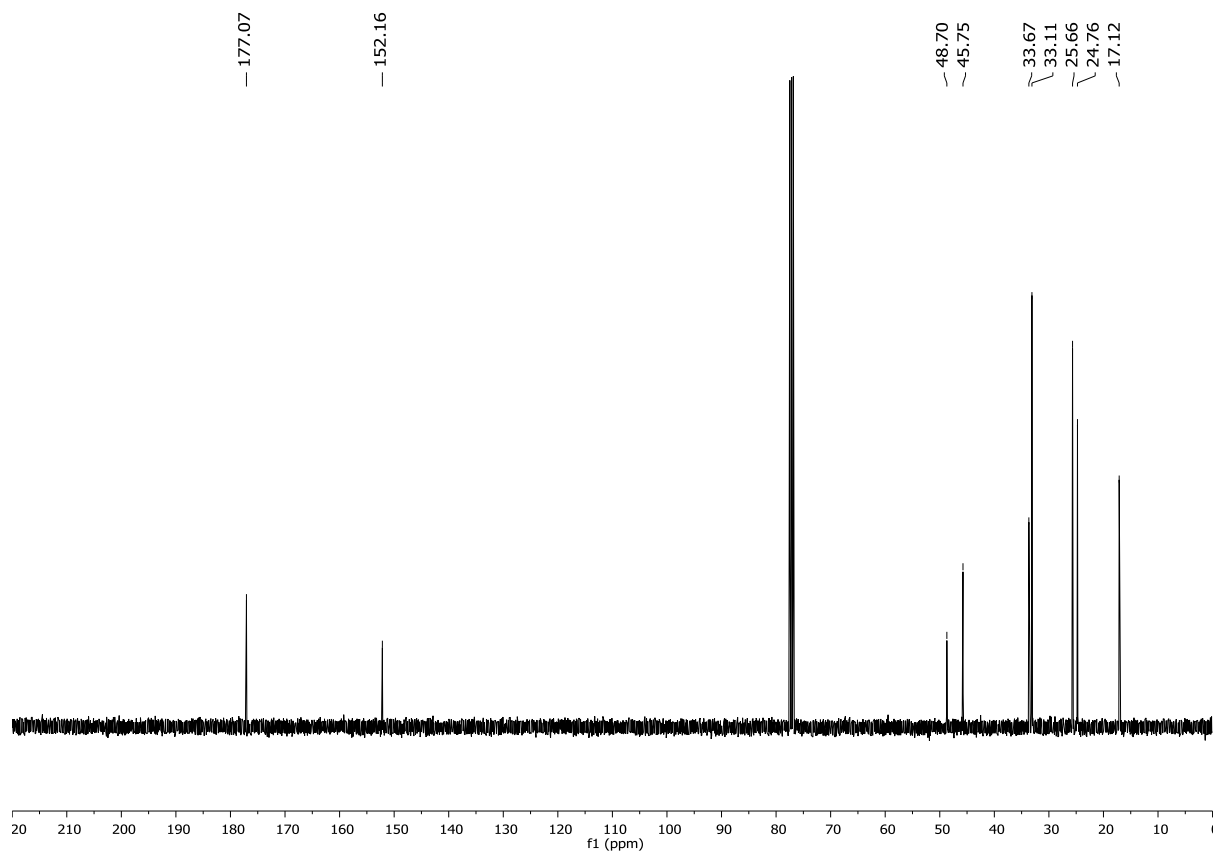

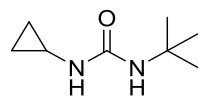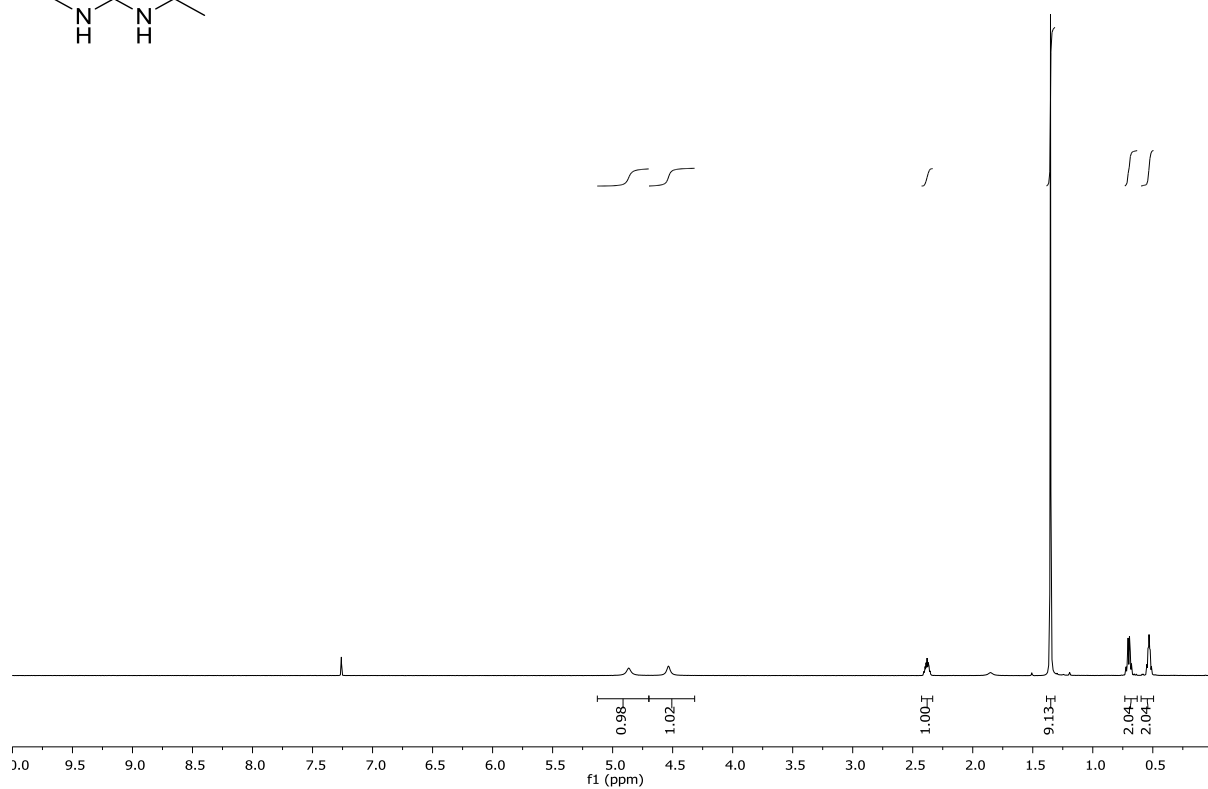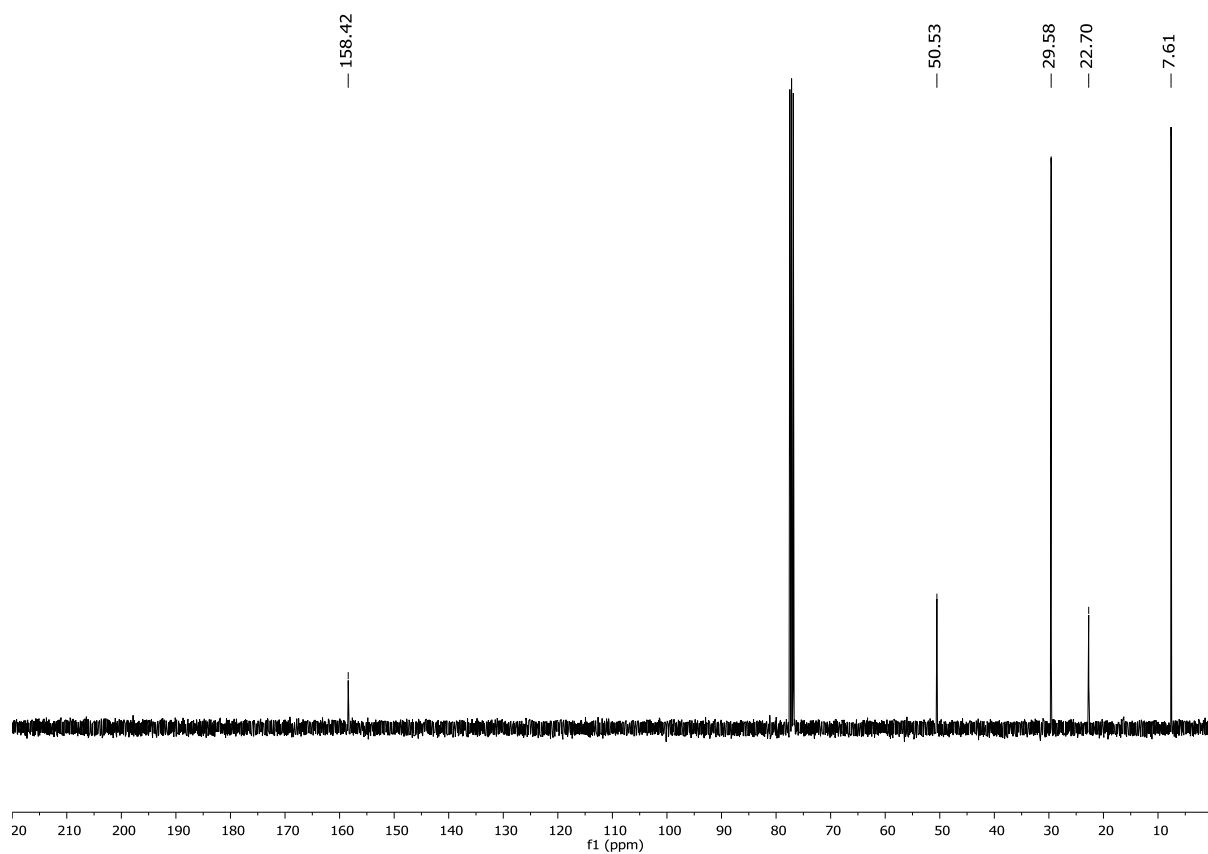

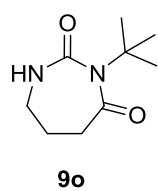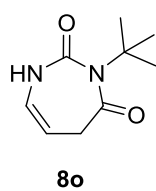

5:1  
9o:8o

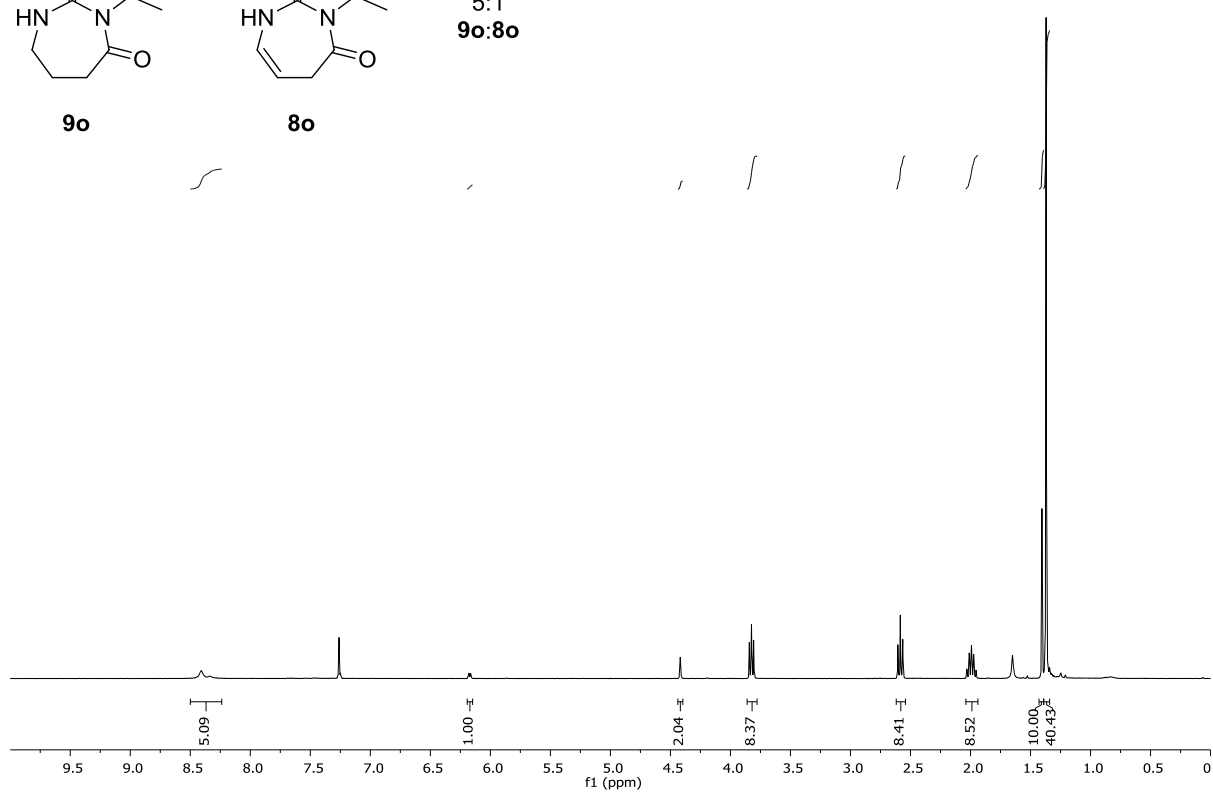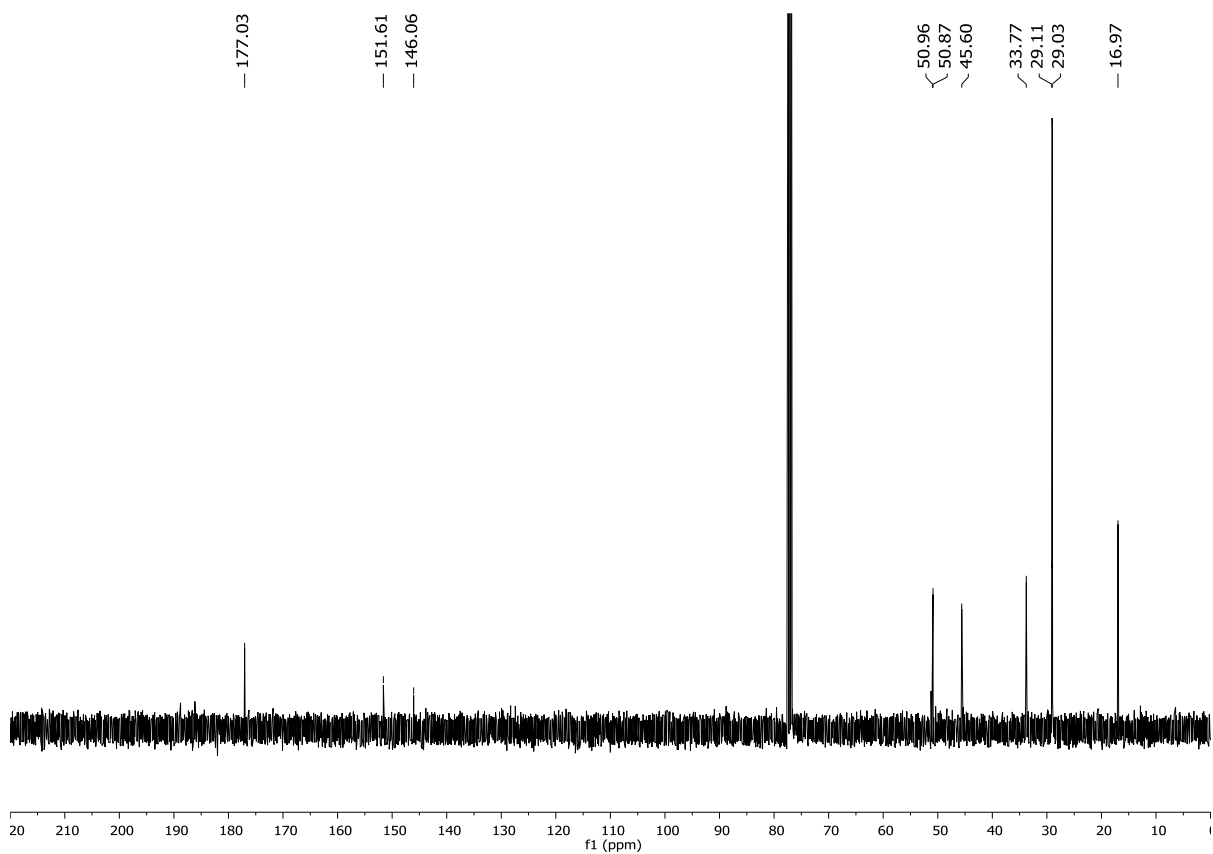

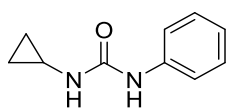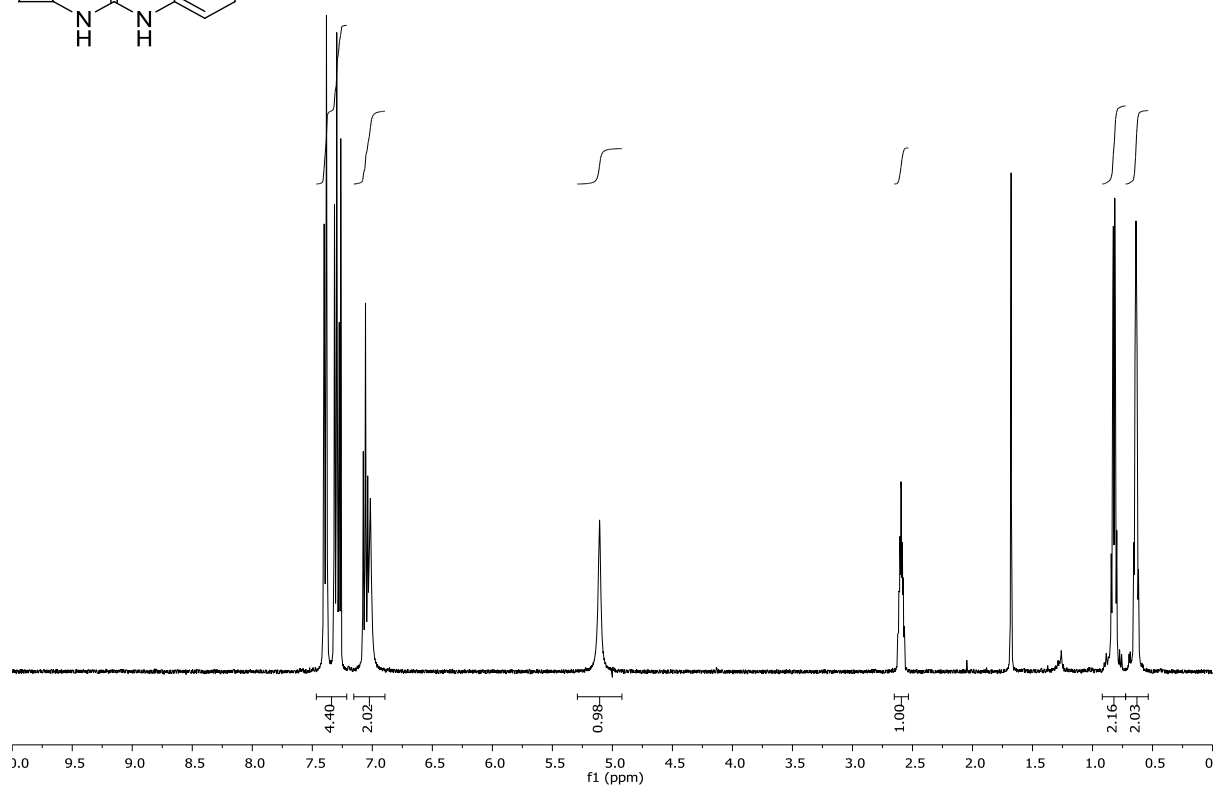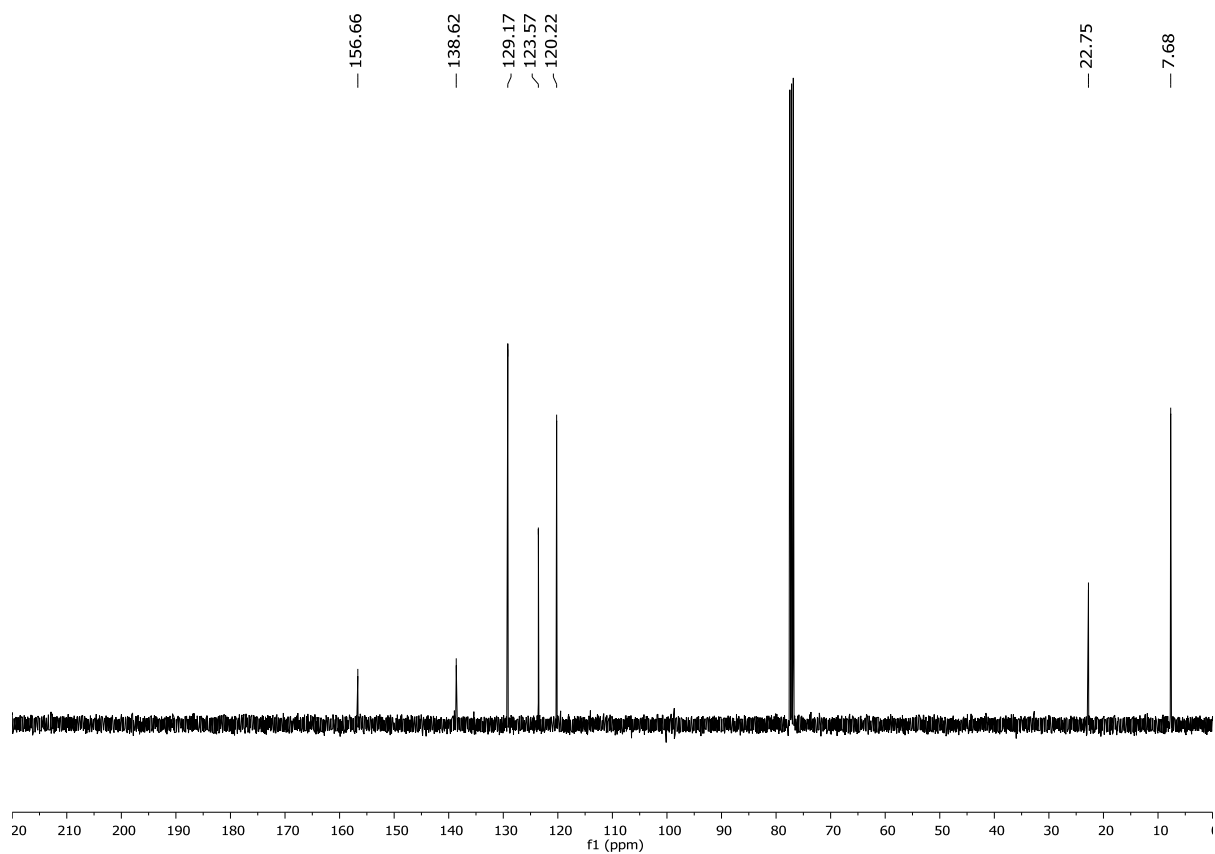

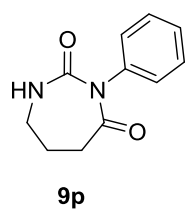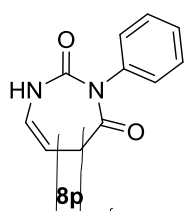

25:1  
9p:8p

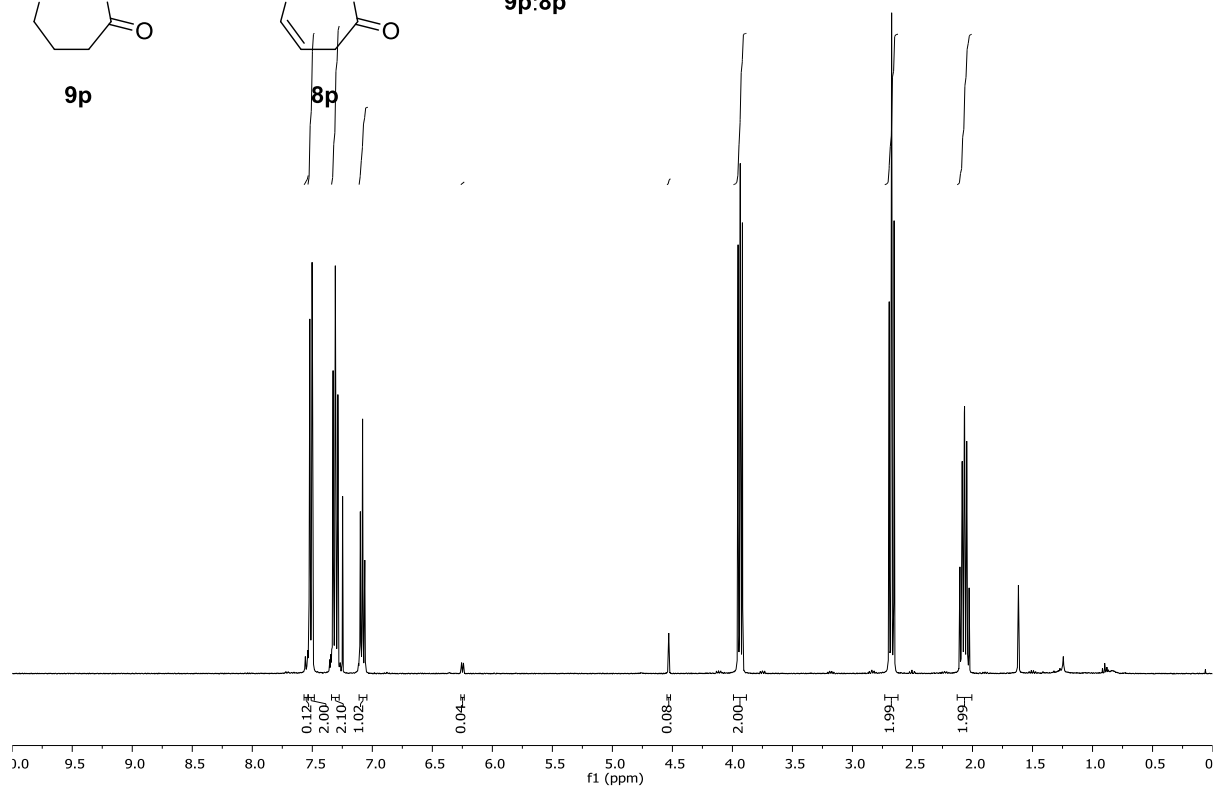

— 177.42  
— 150.32  
— 137.57  
— 129.12  
— 124.17  
— 120.17  
— 100.13  
— 45.83  
— 33.67  
— 29.84  
— 16.92

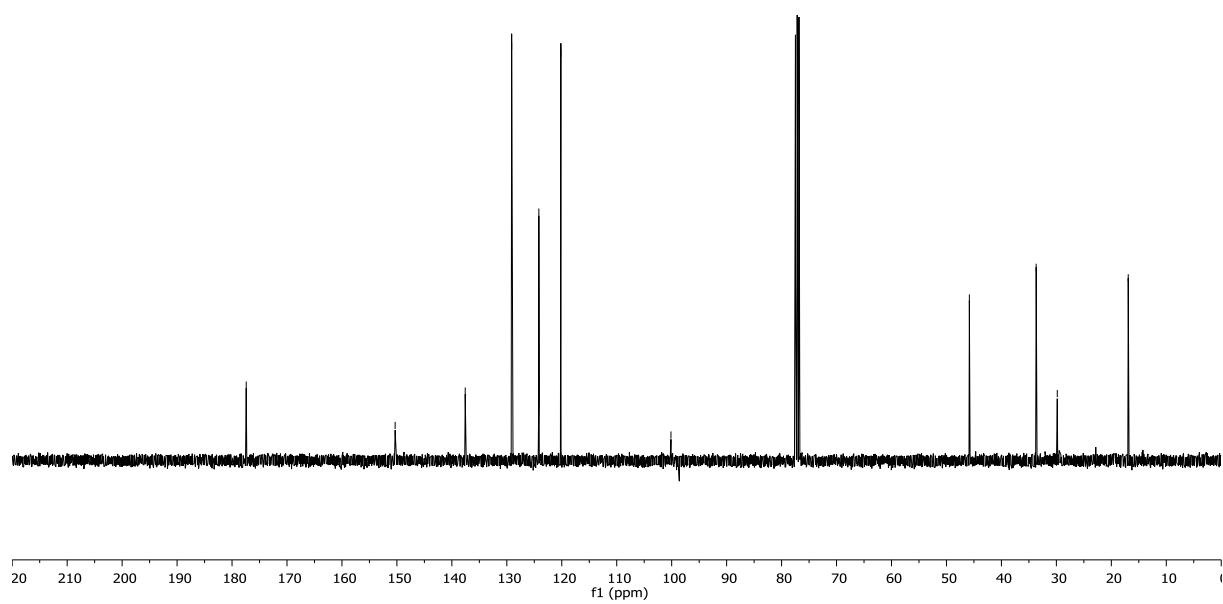



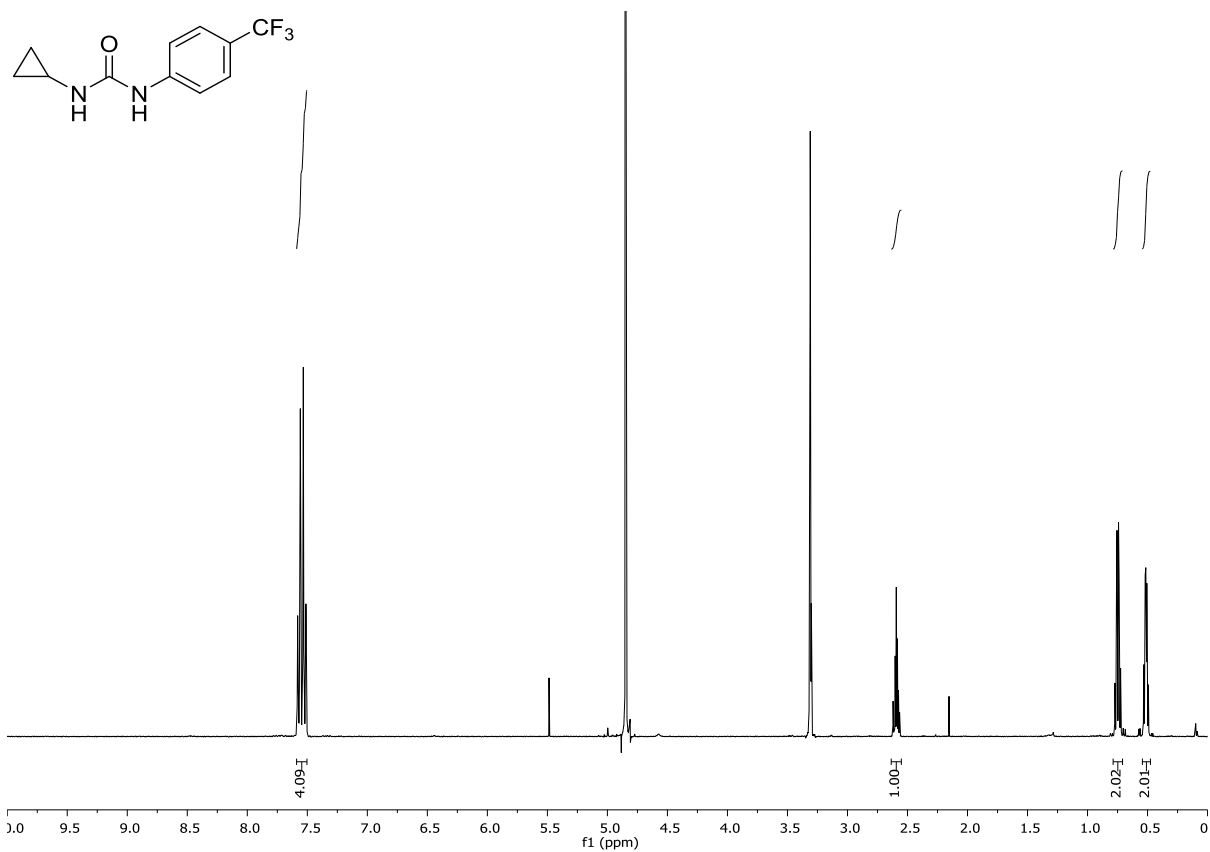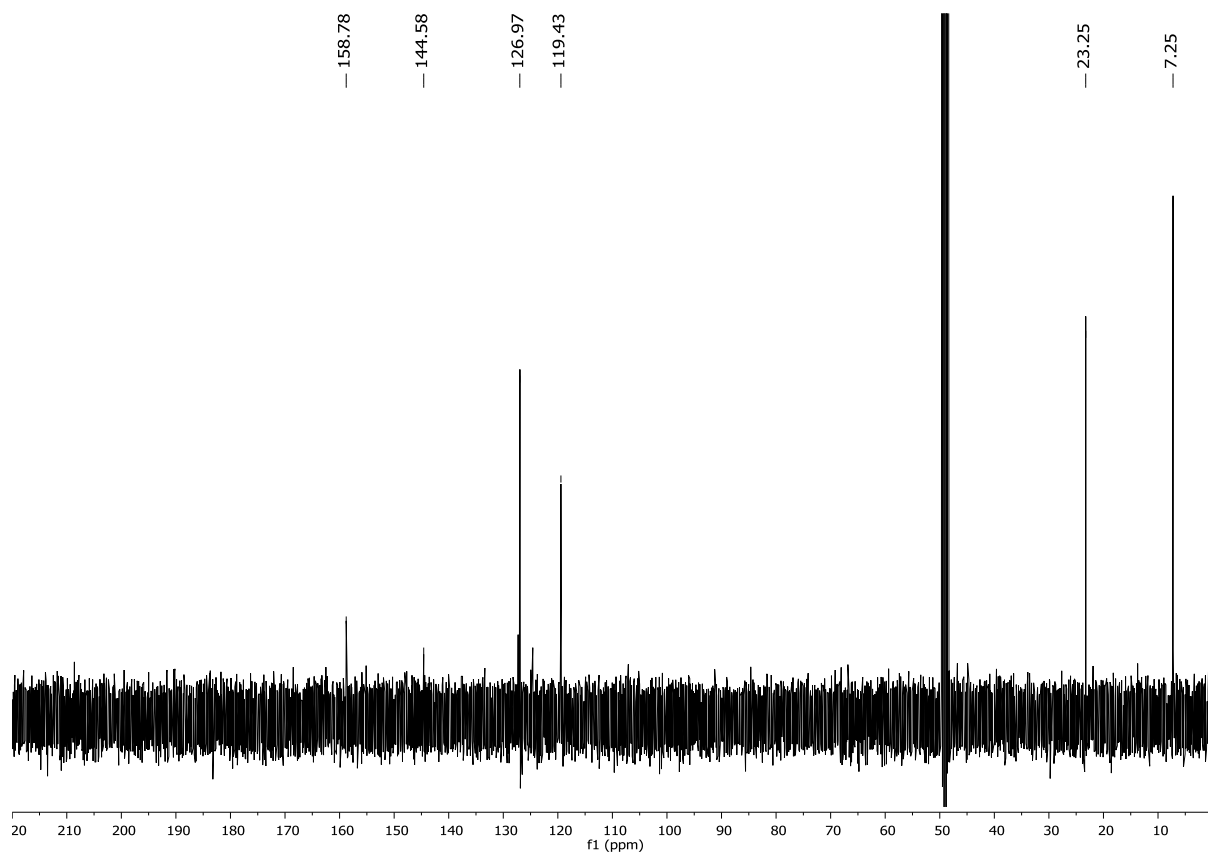

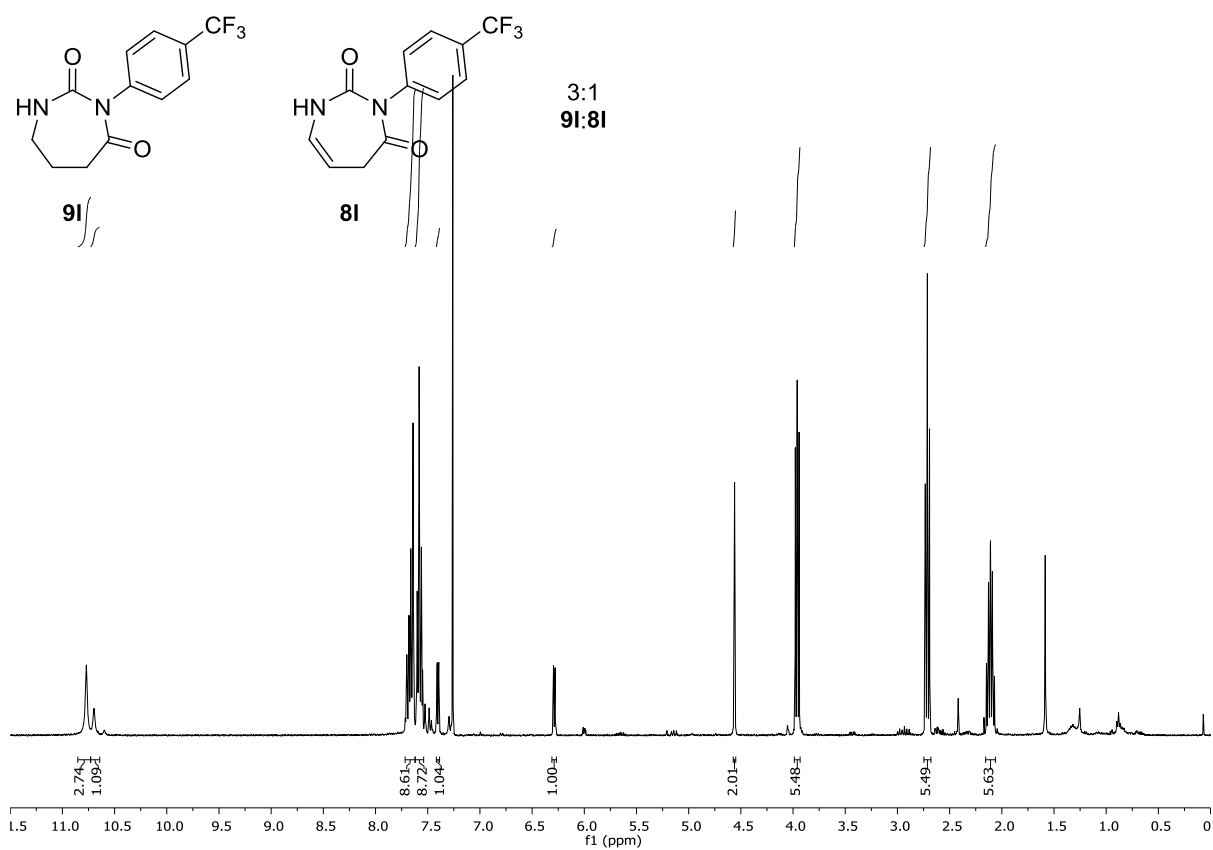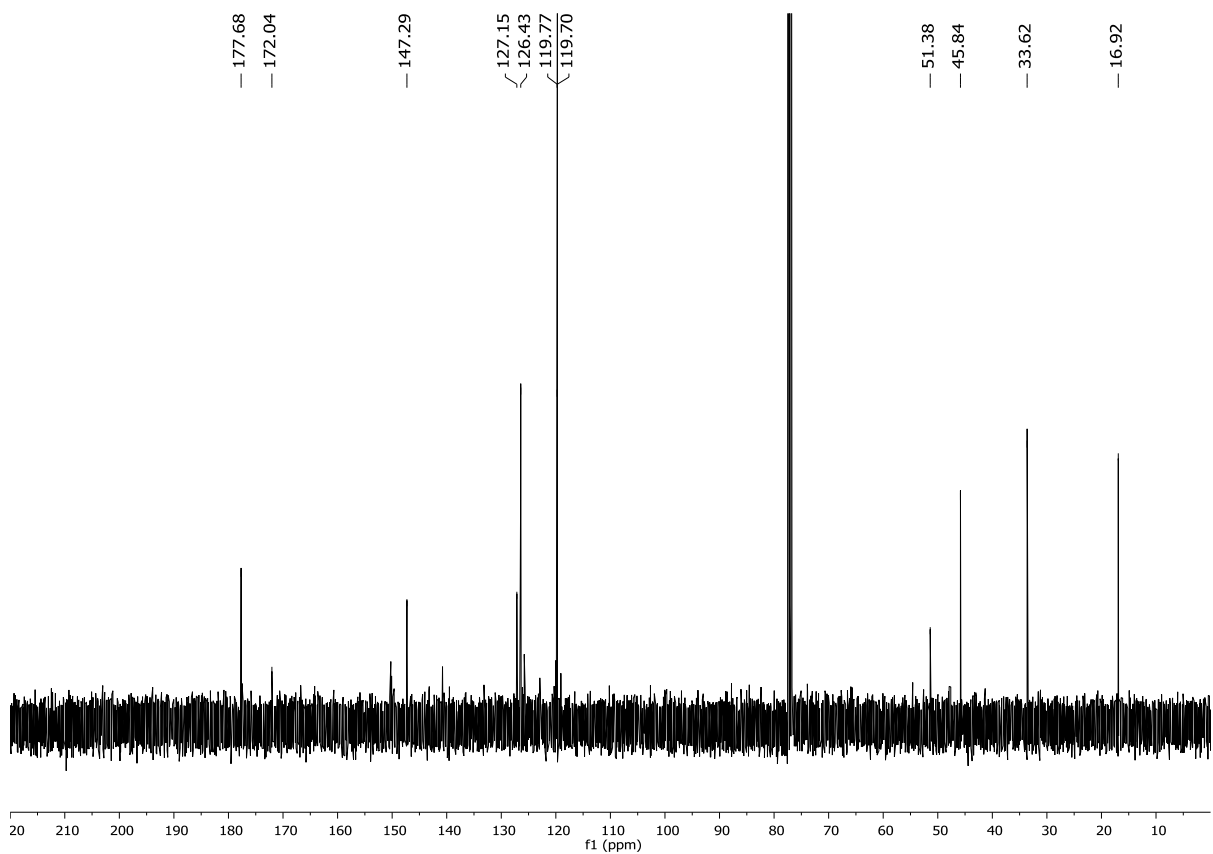

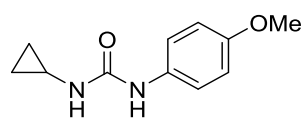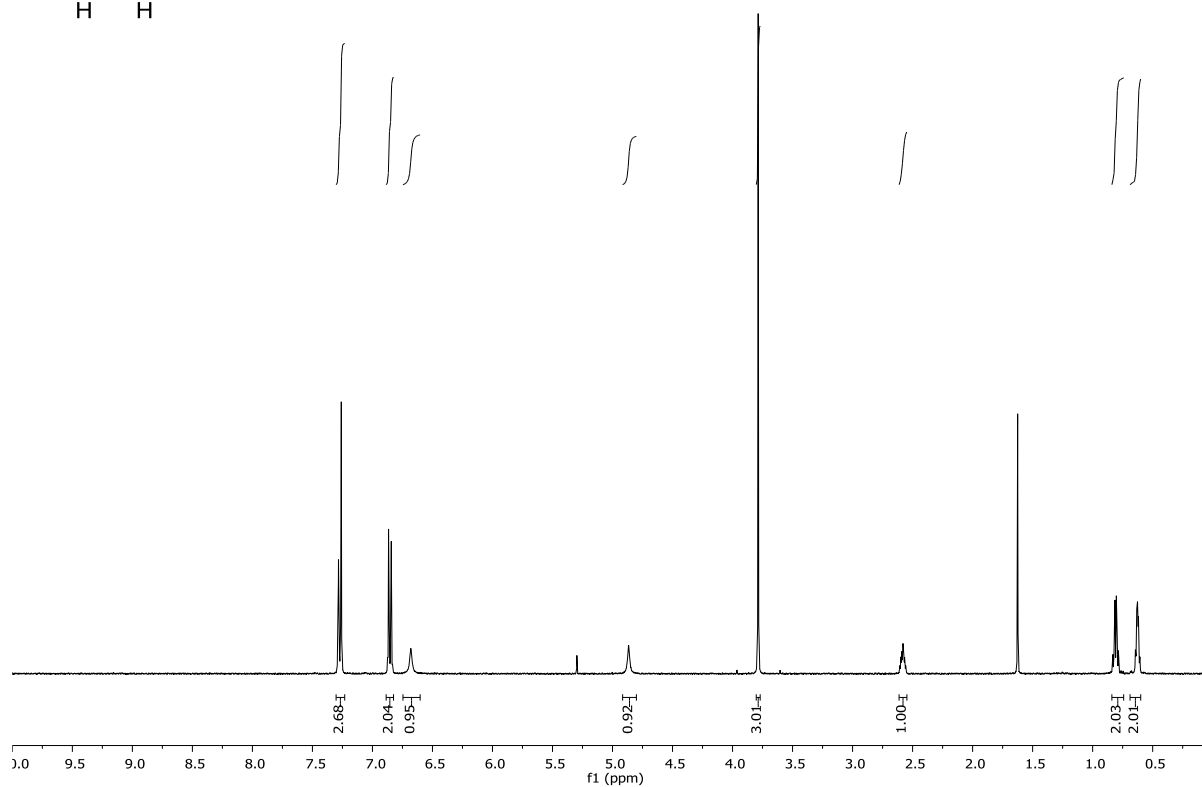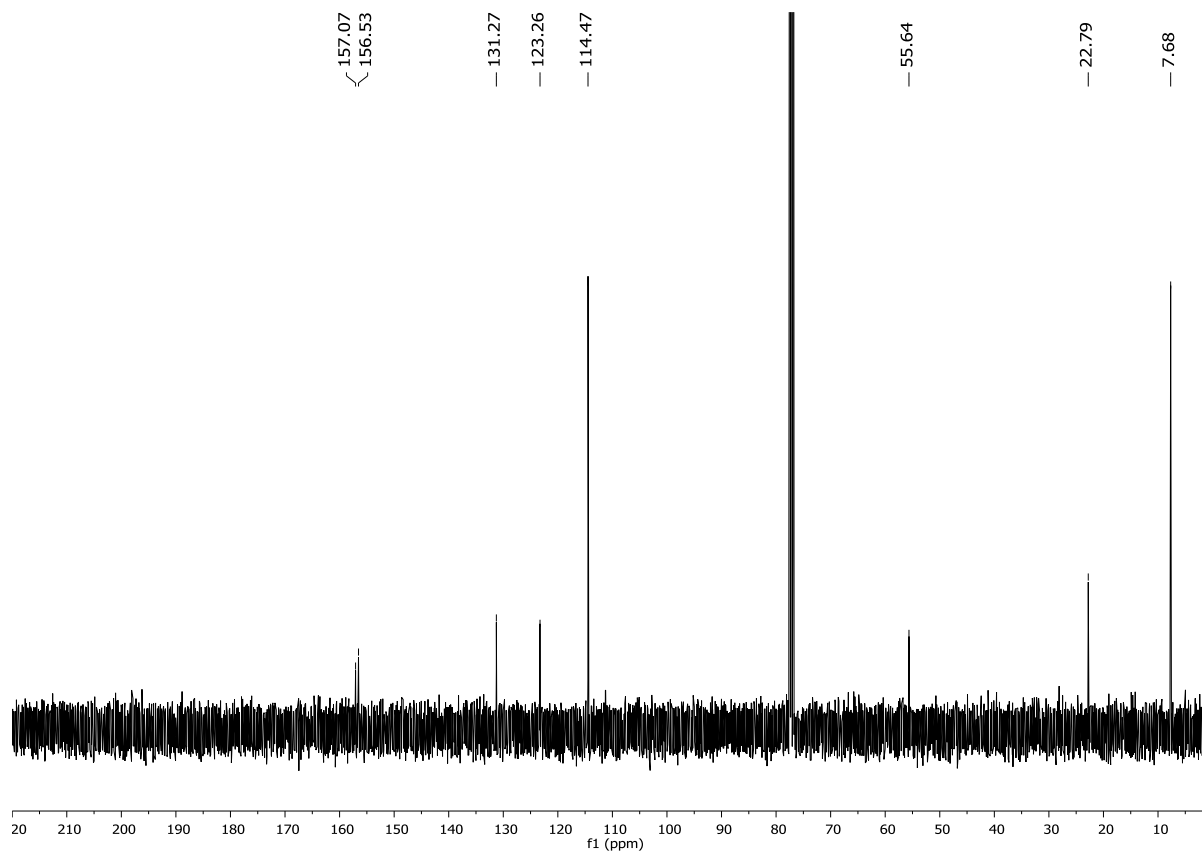

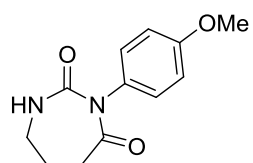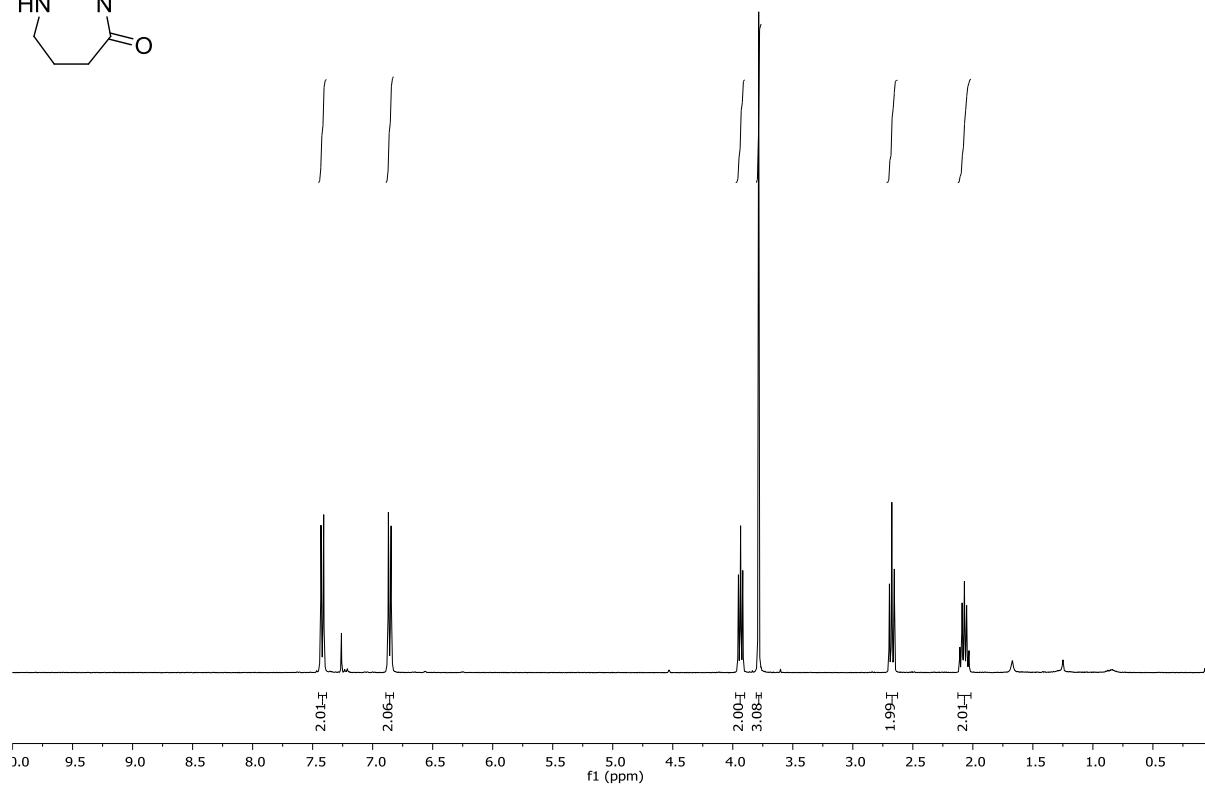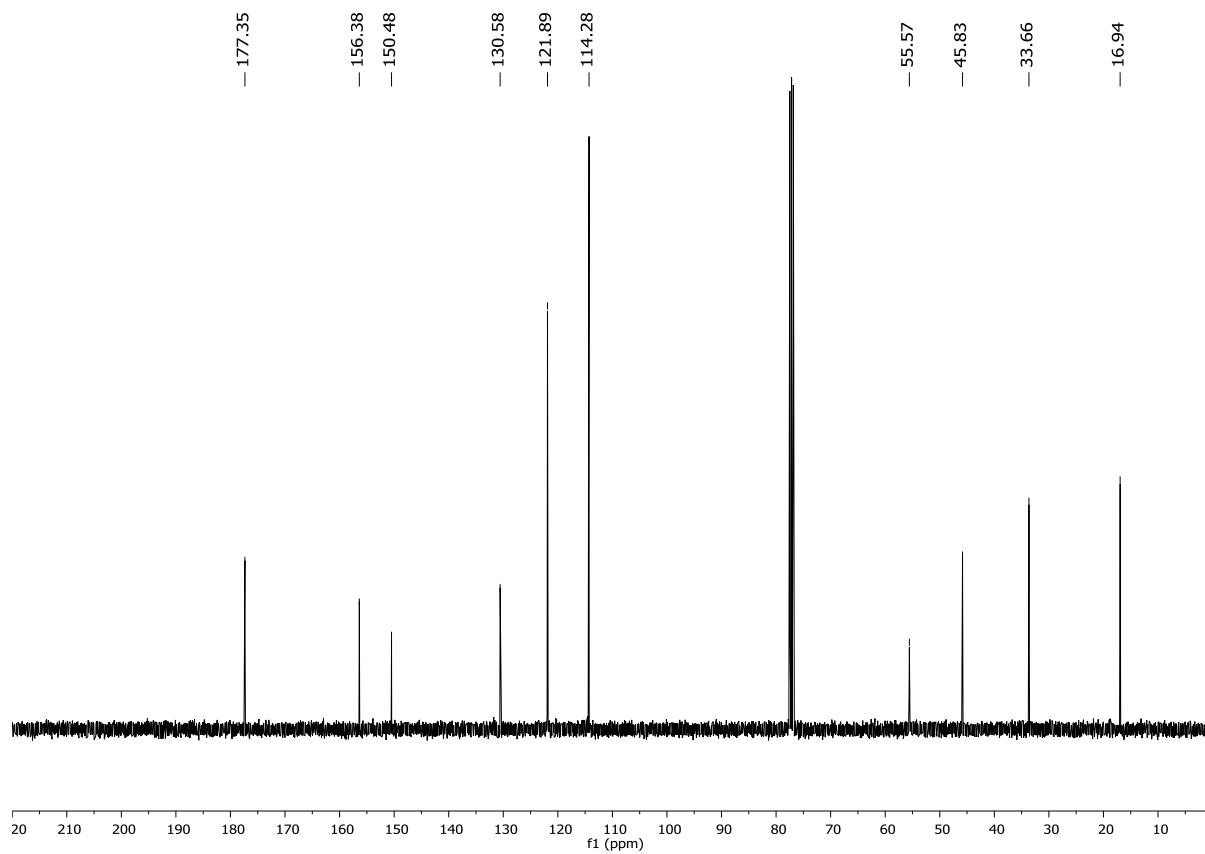

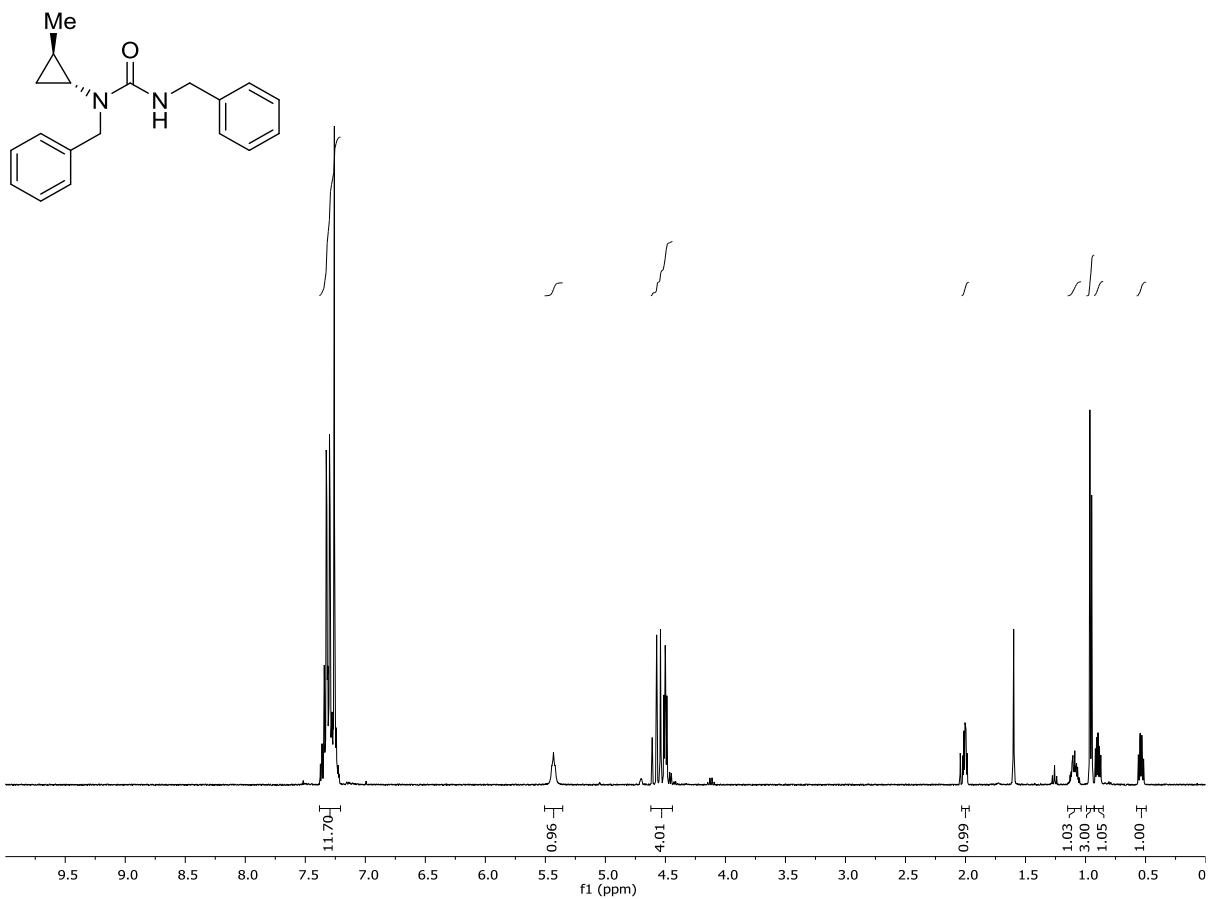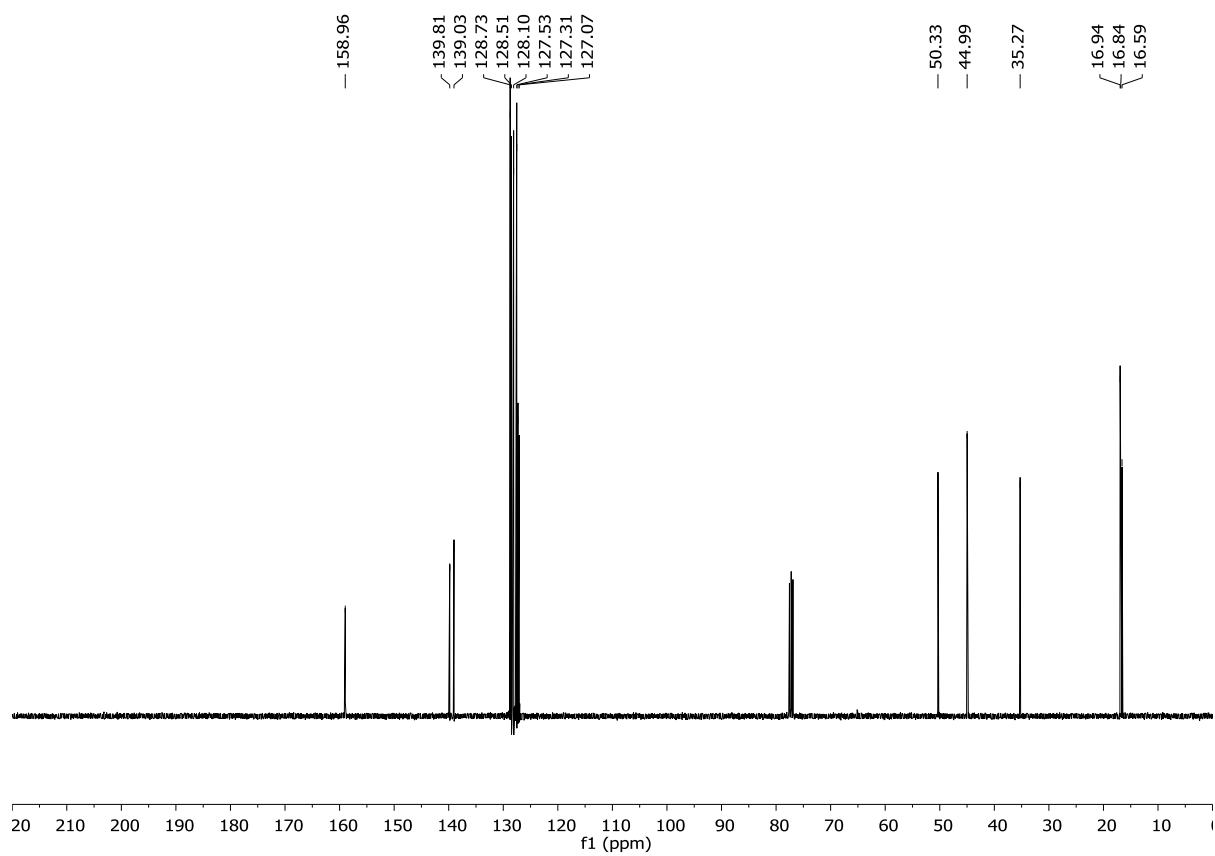

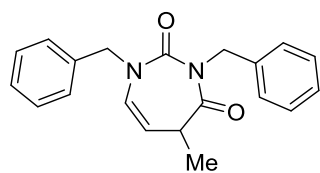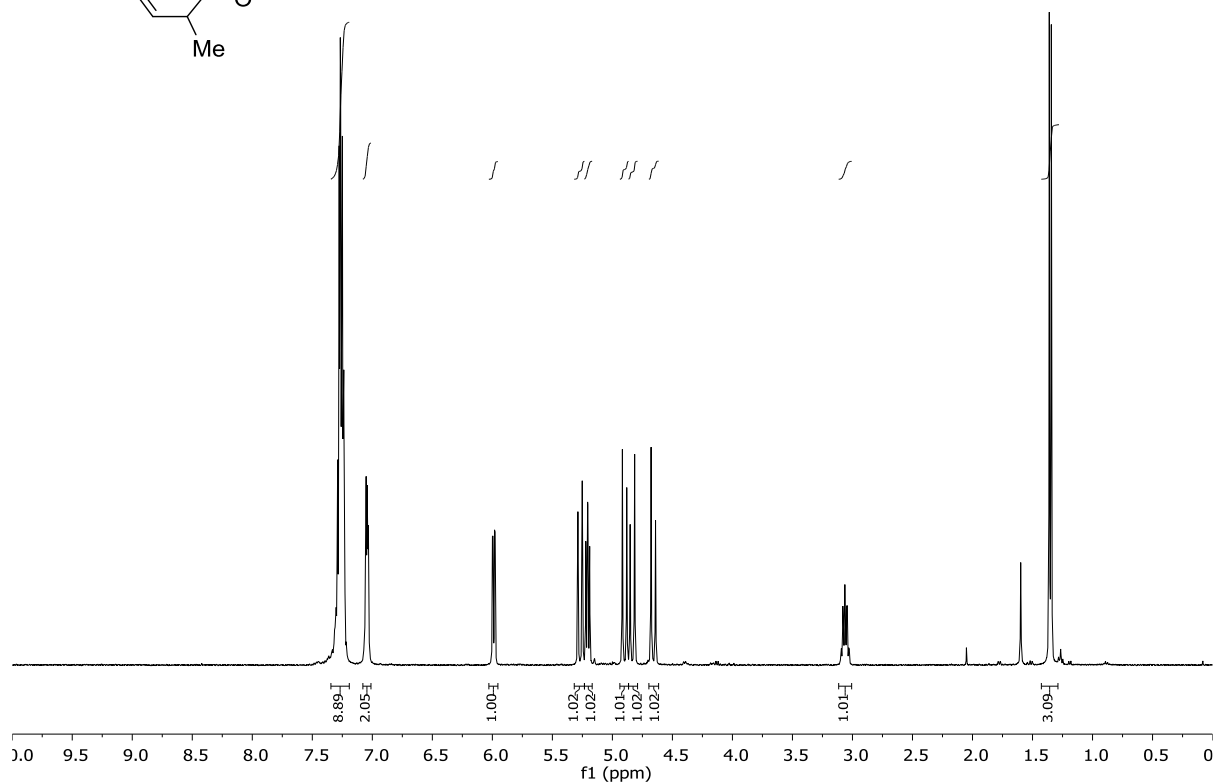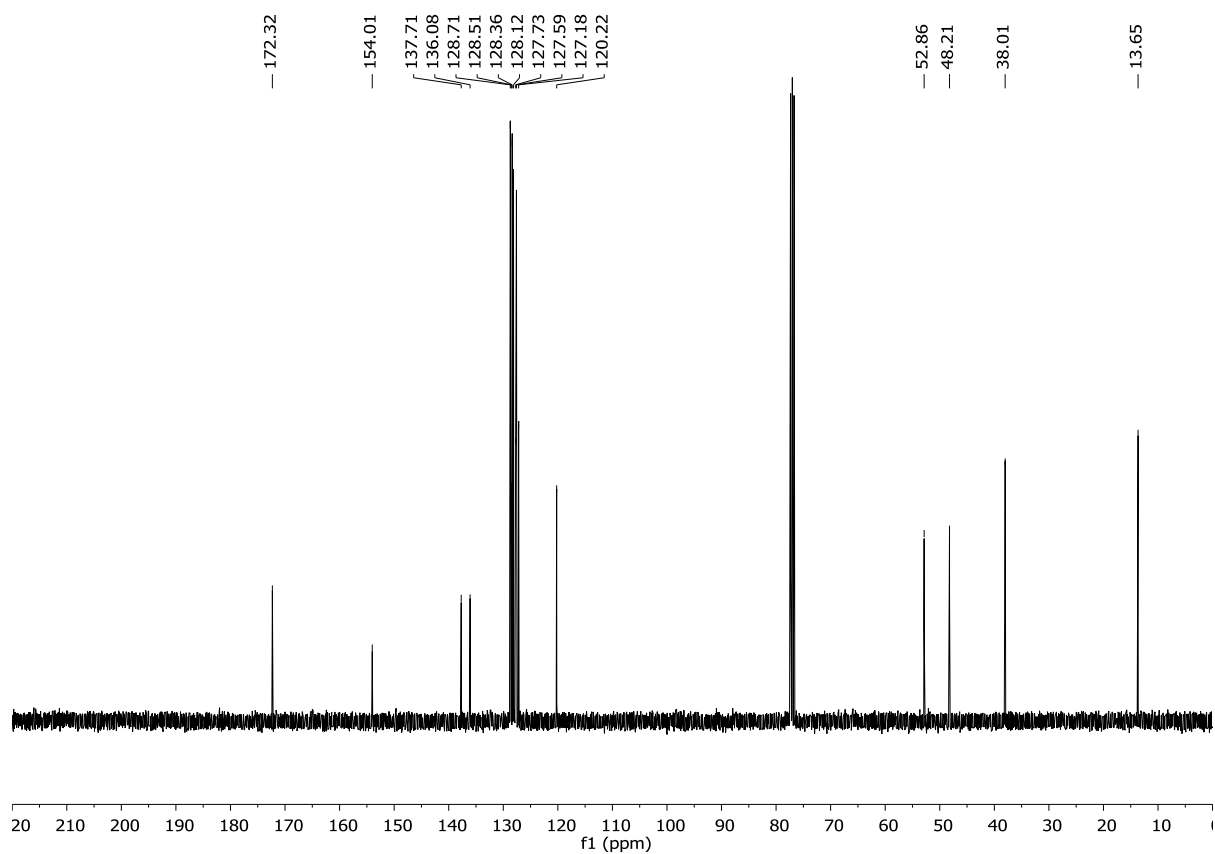

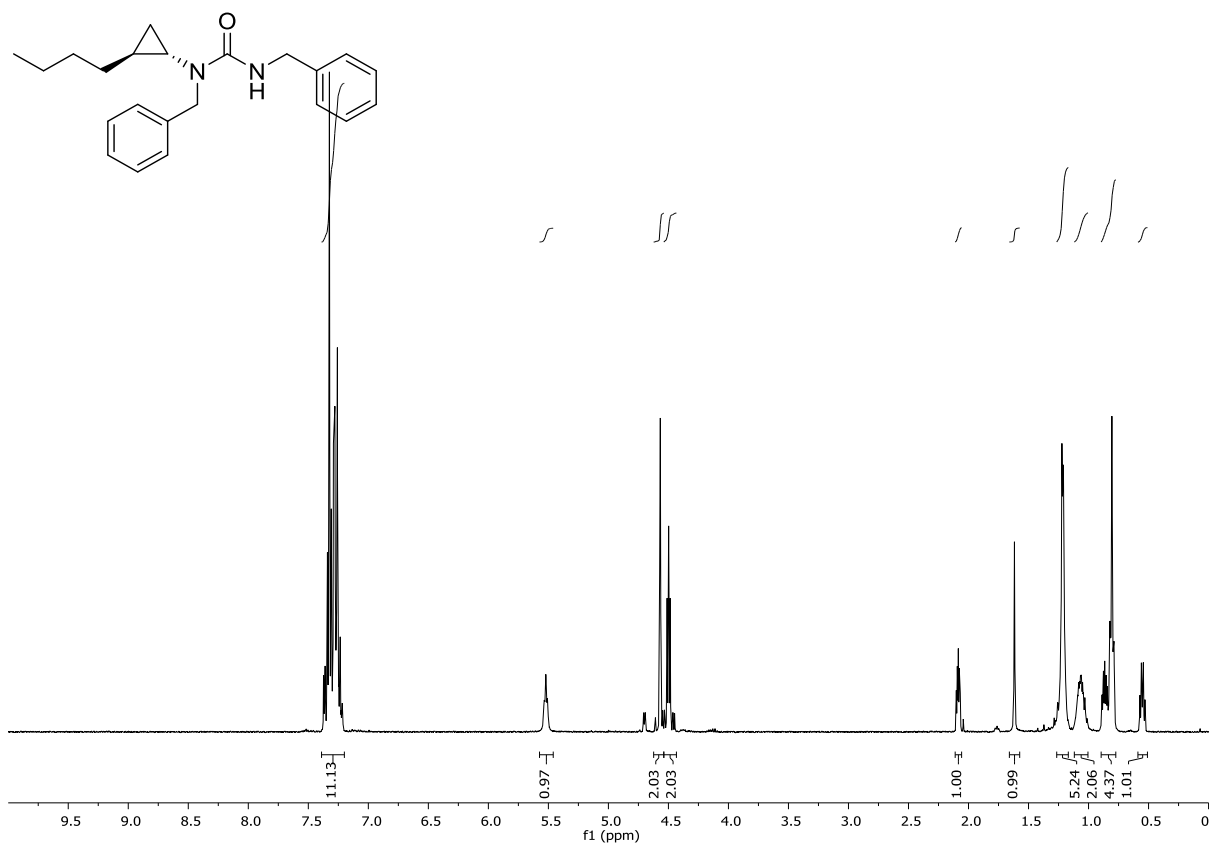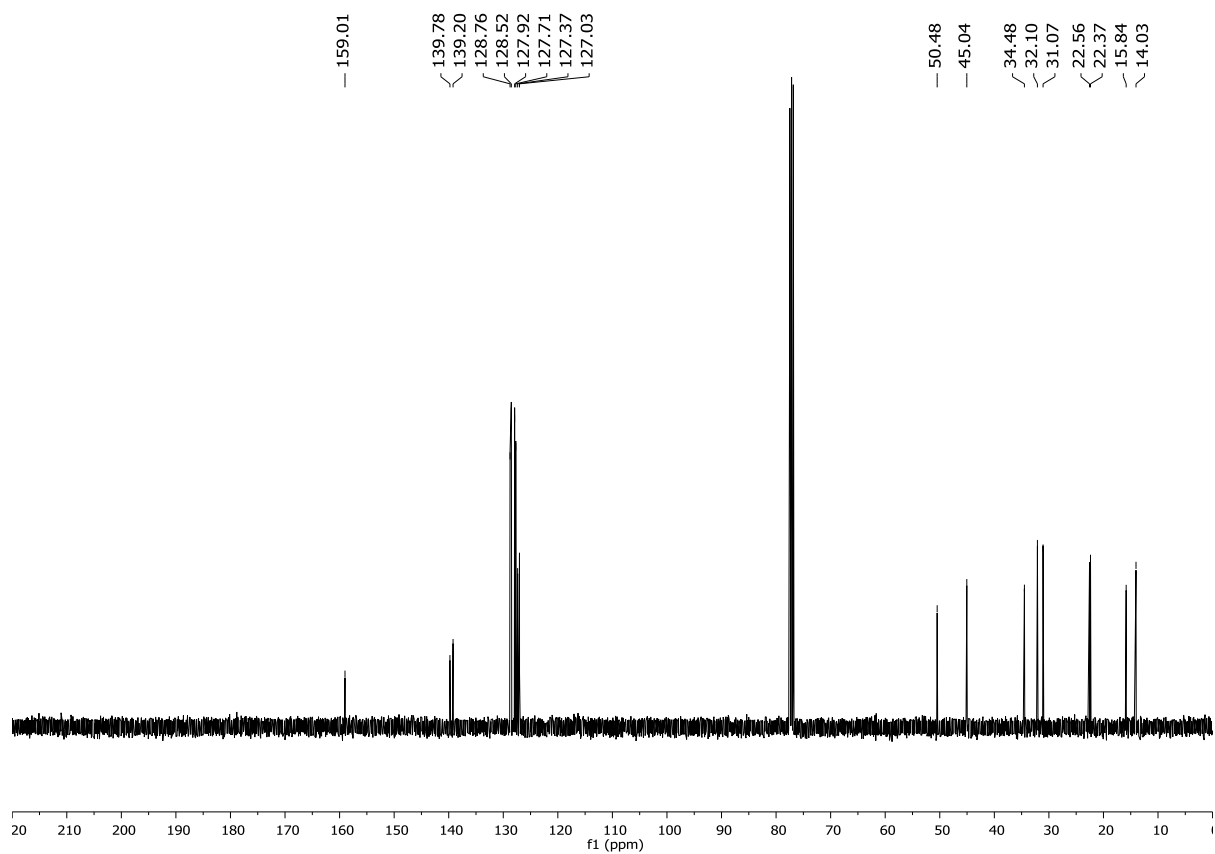

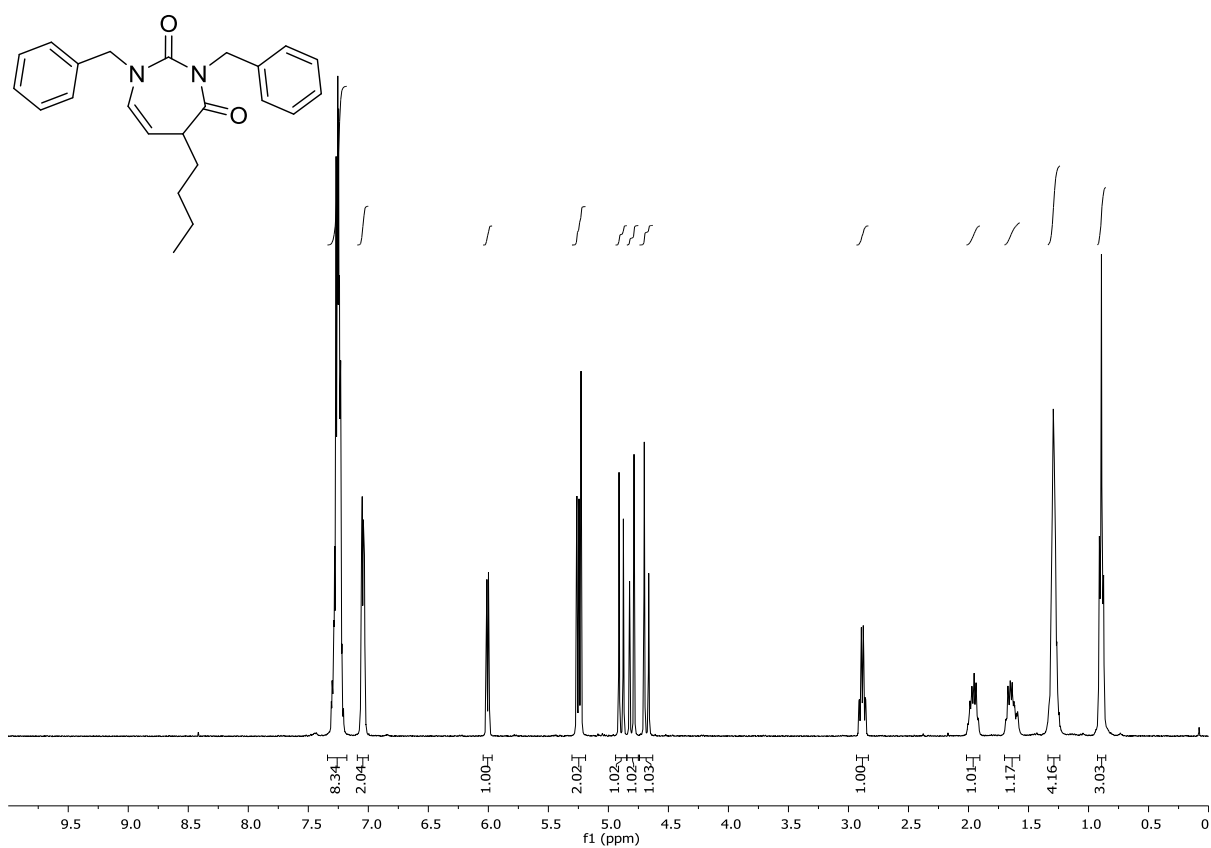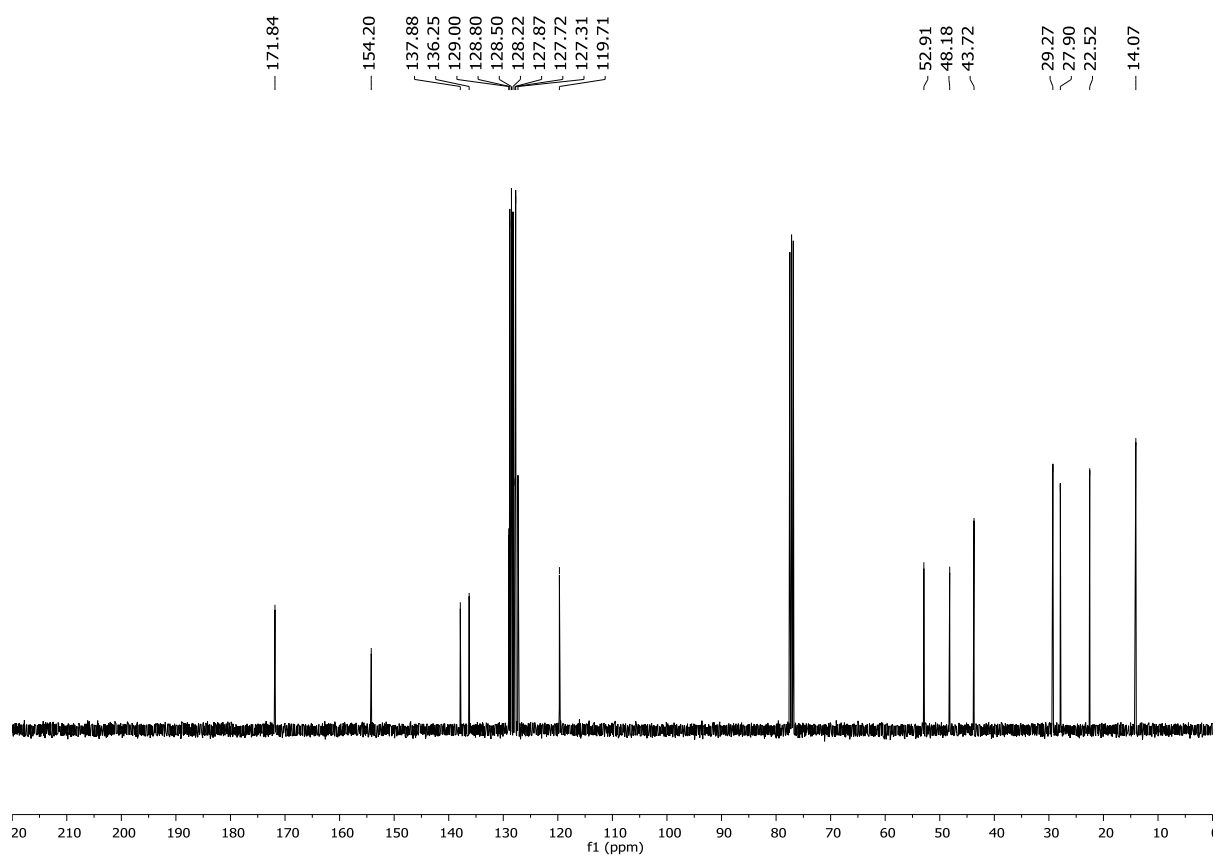



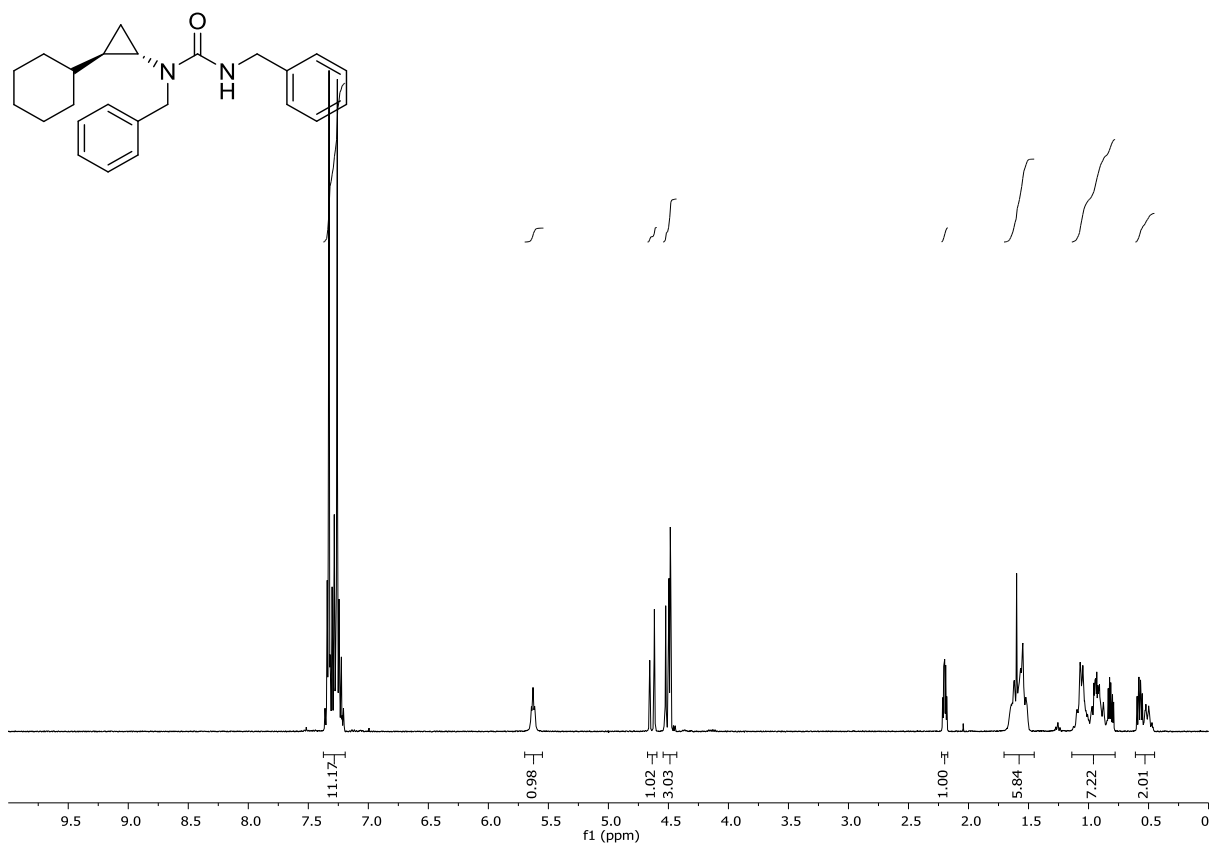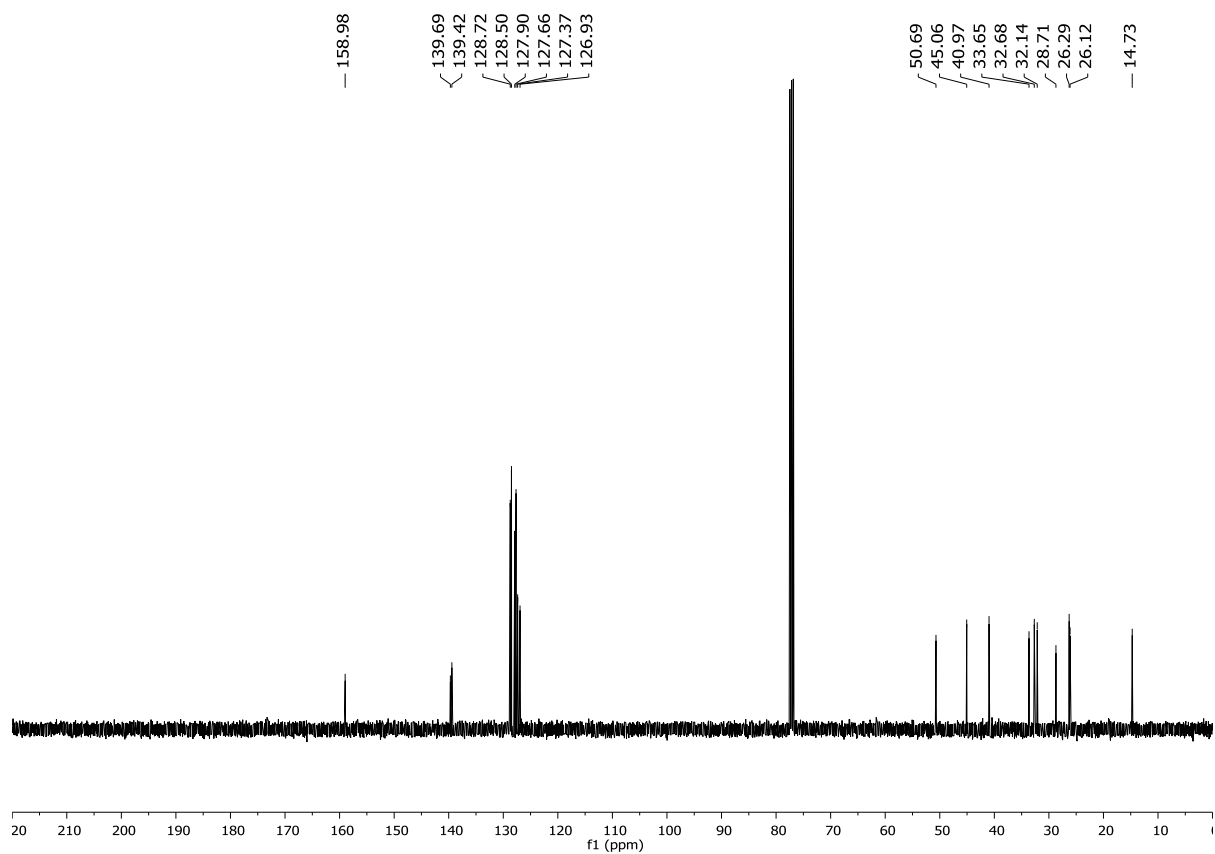

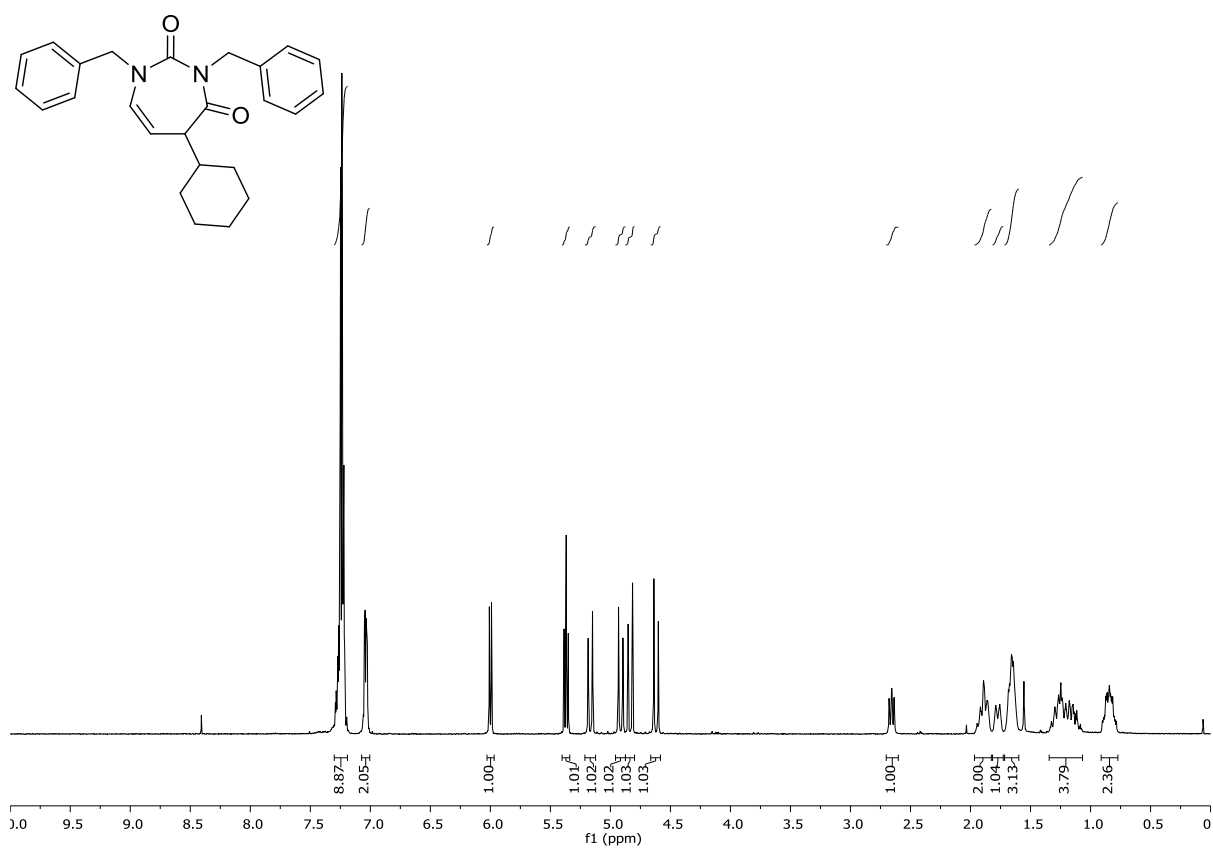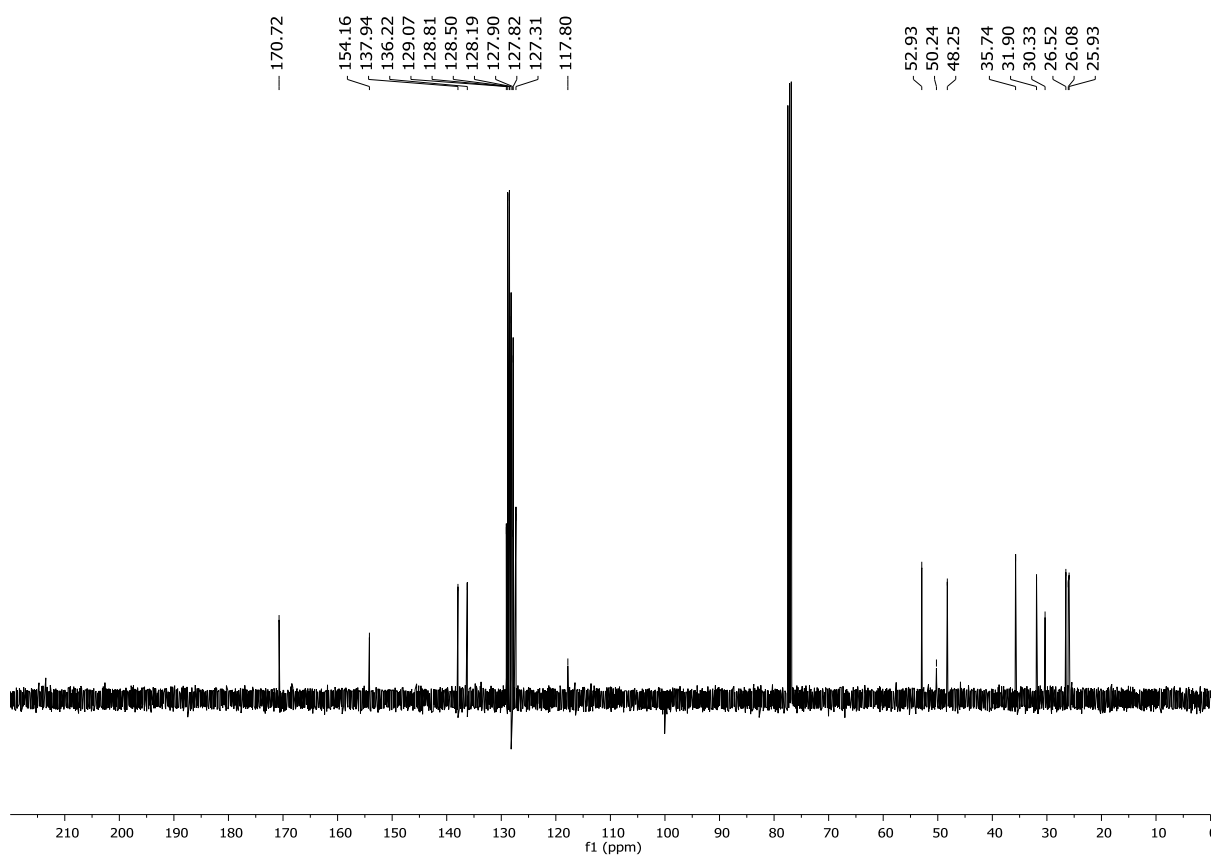

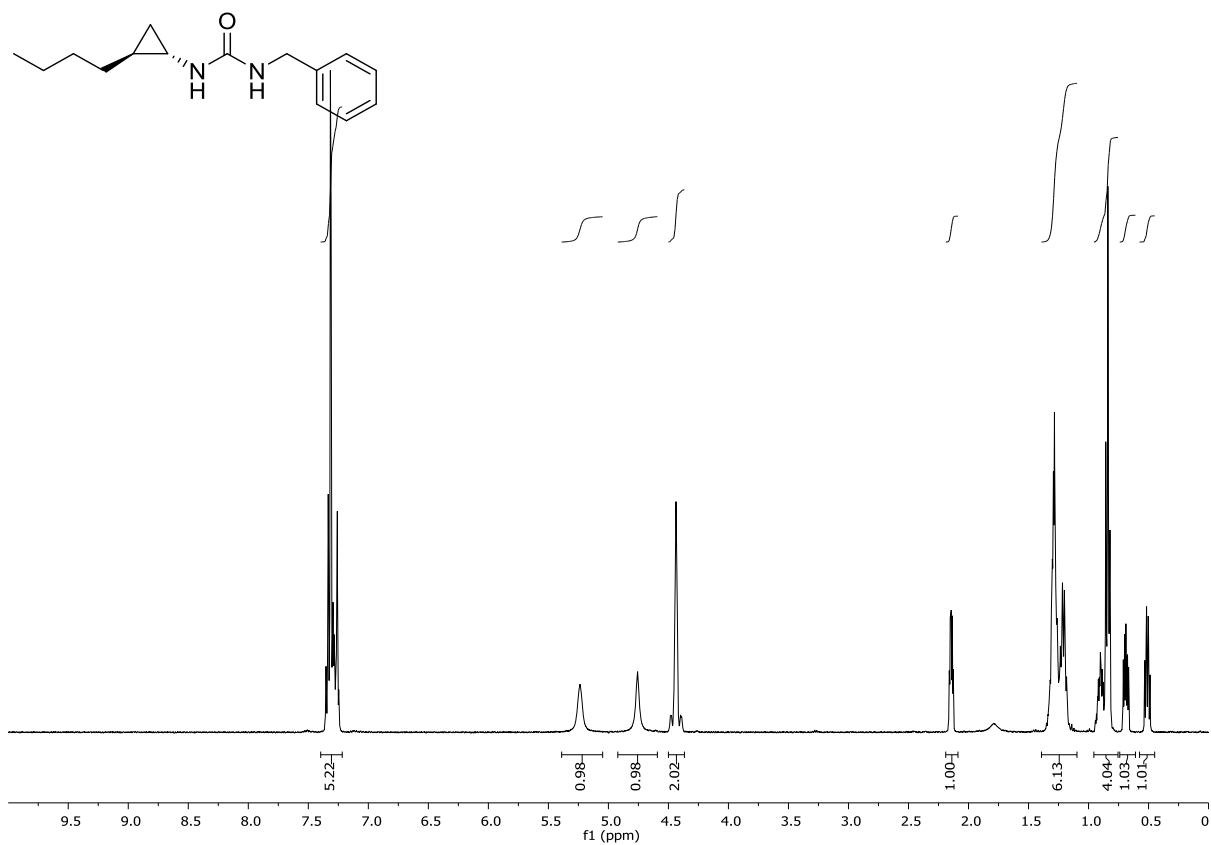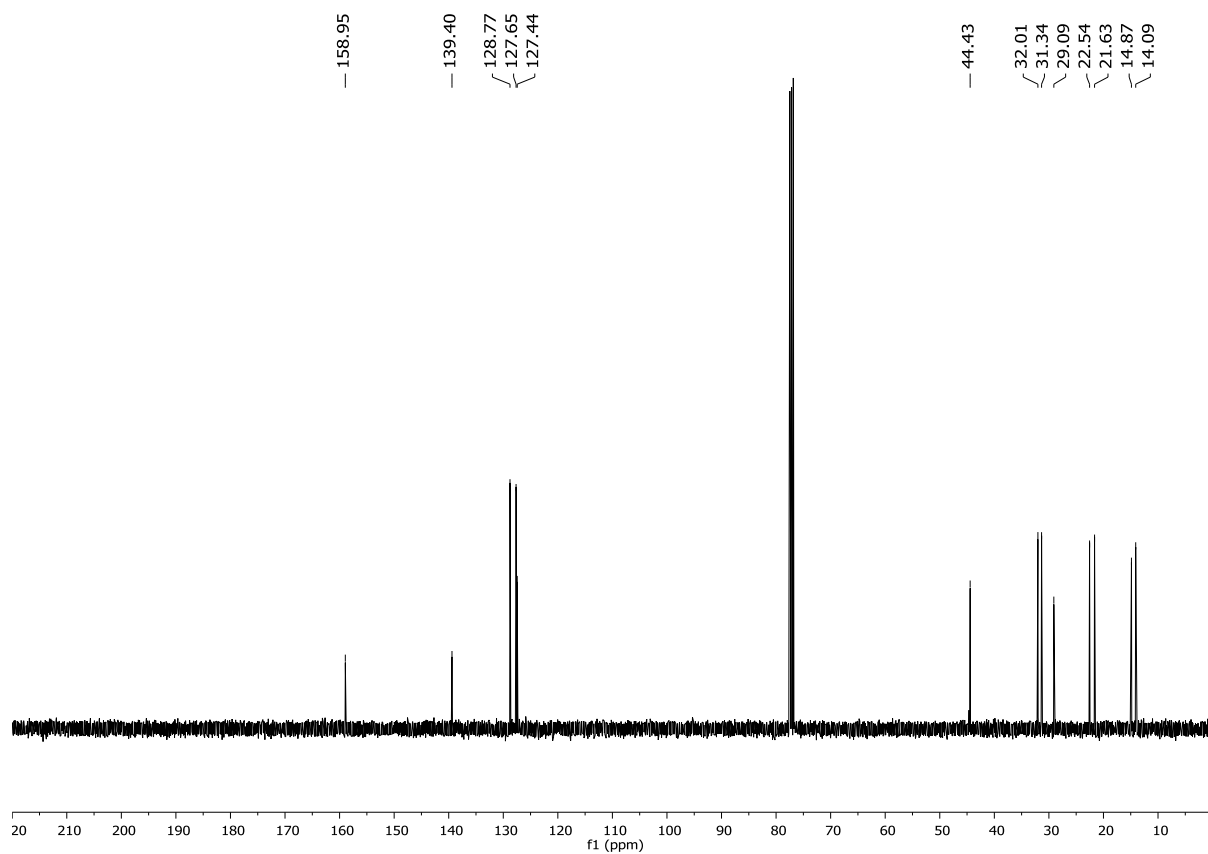

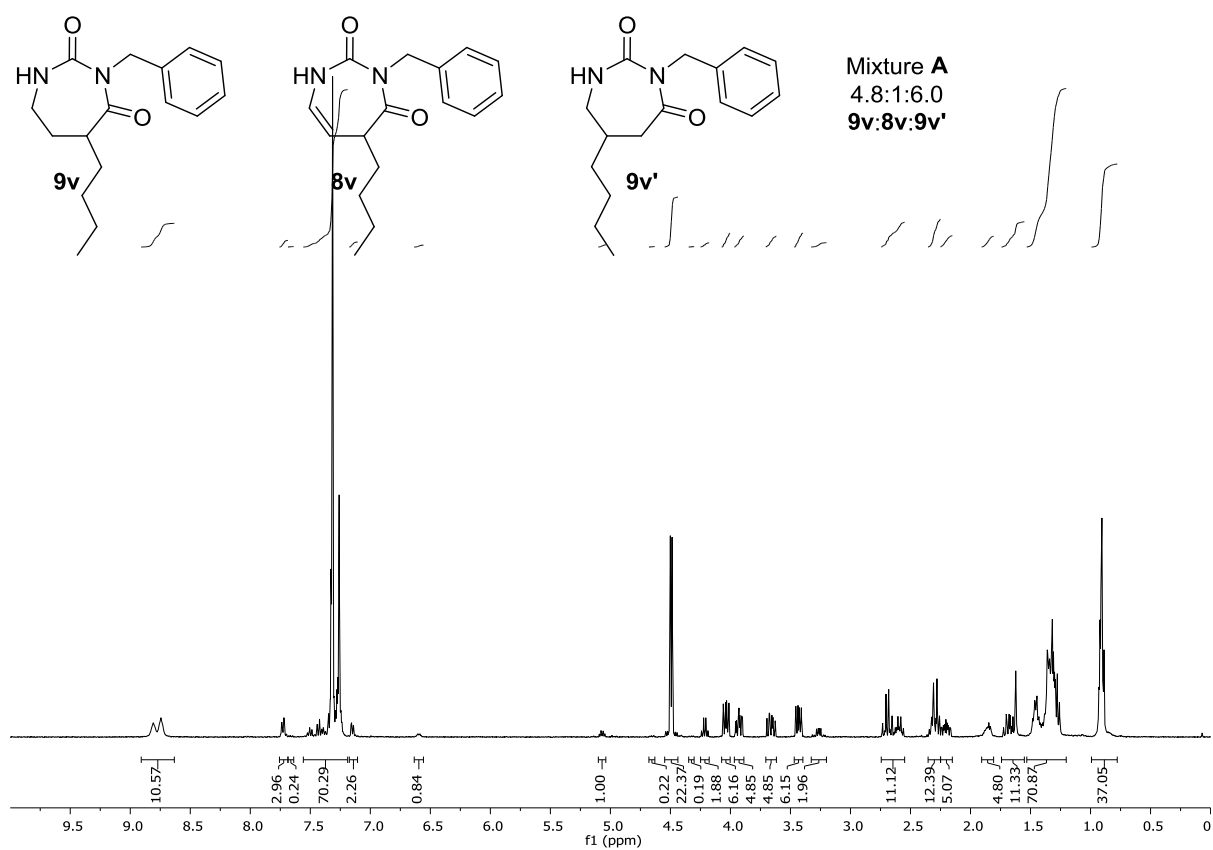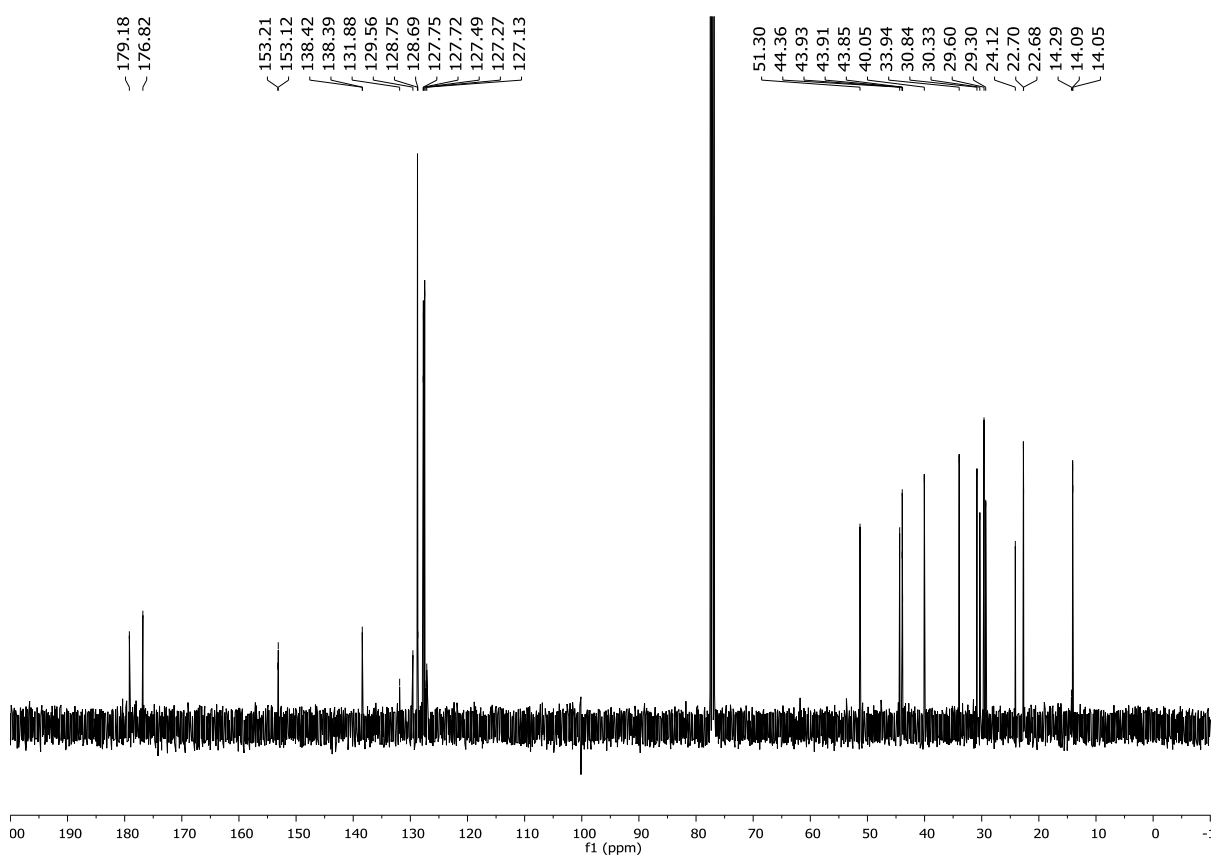

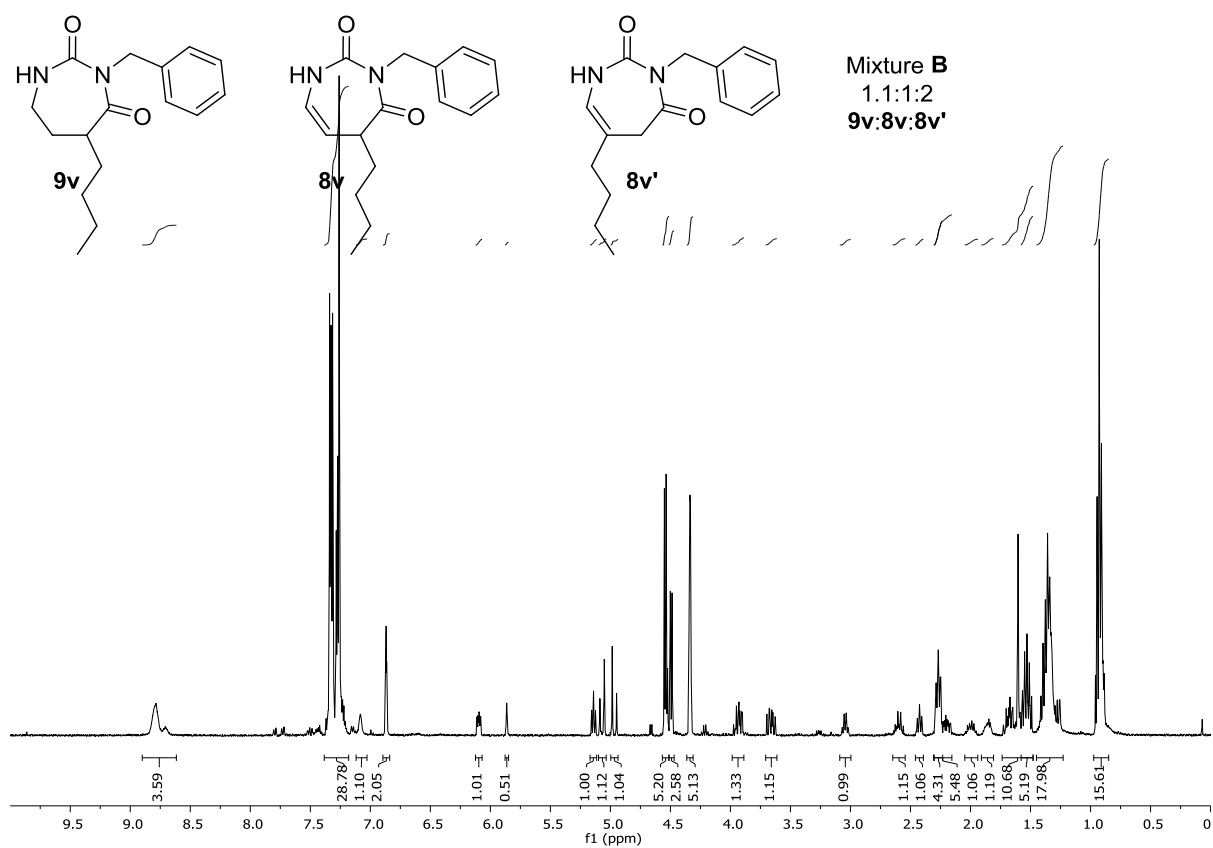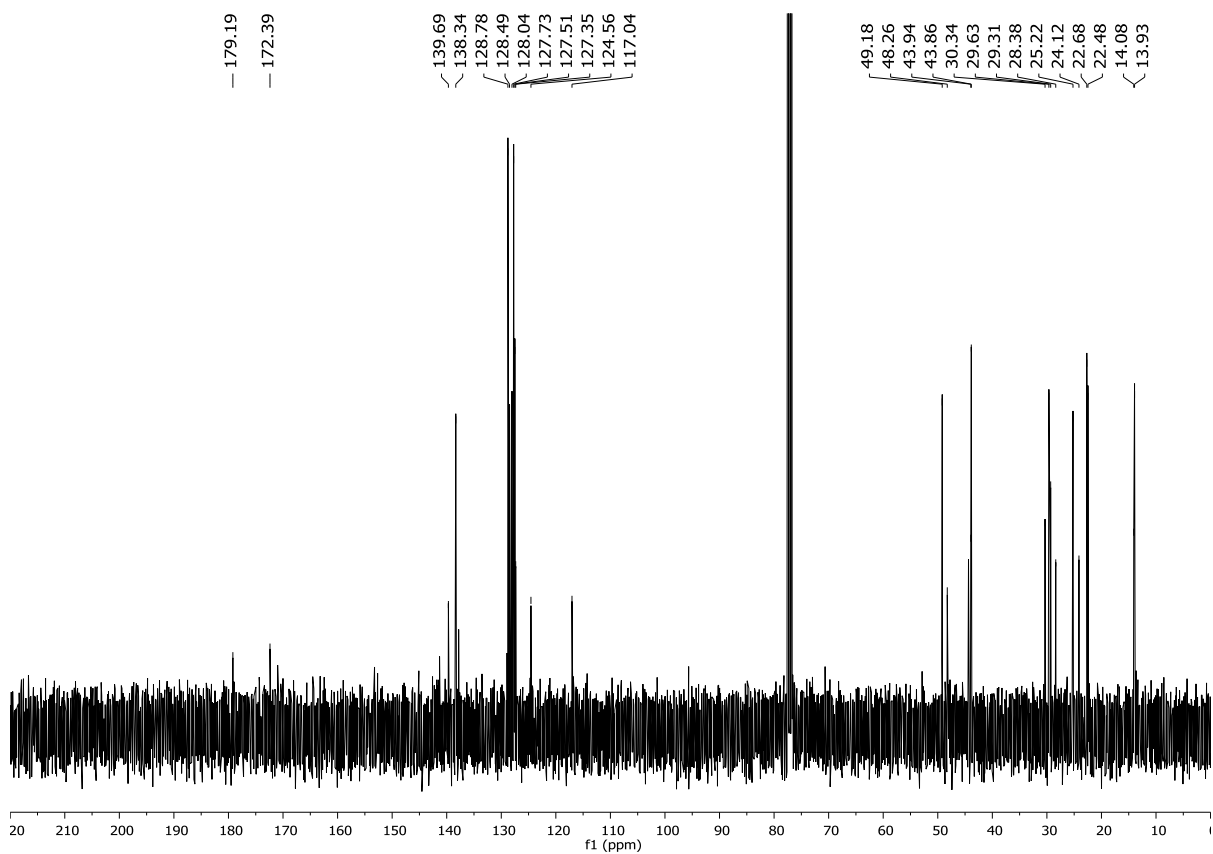

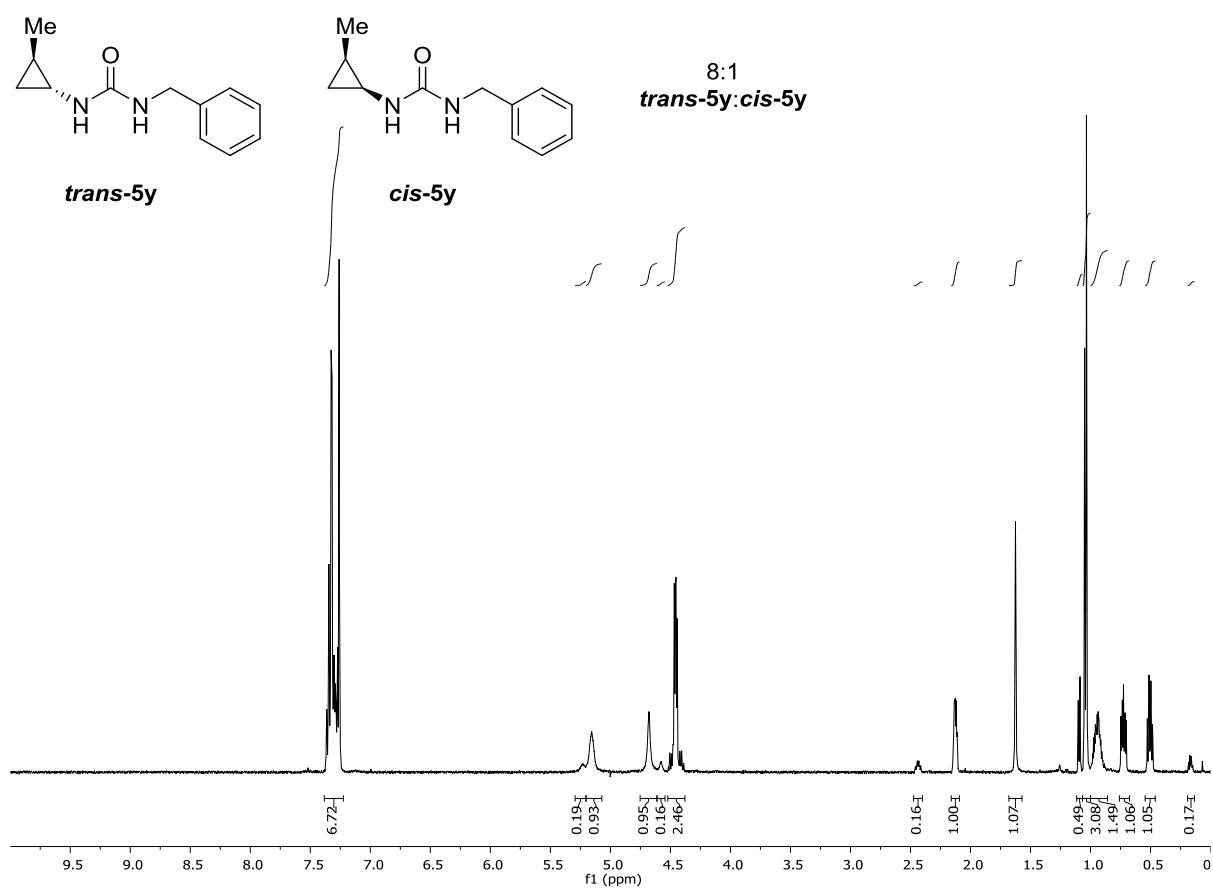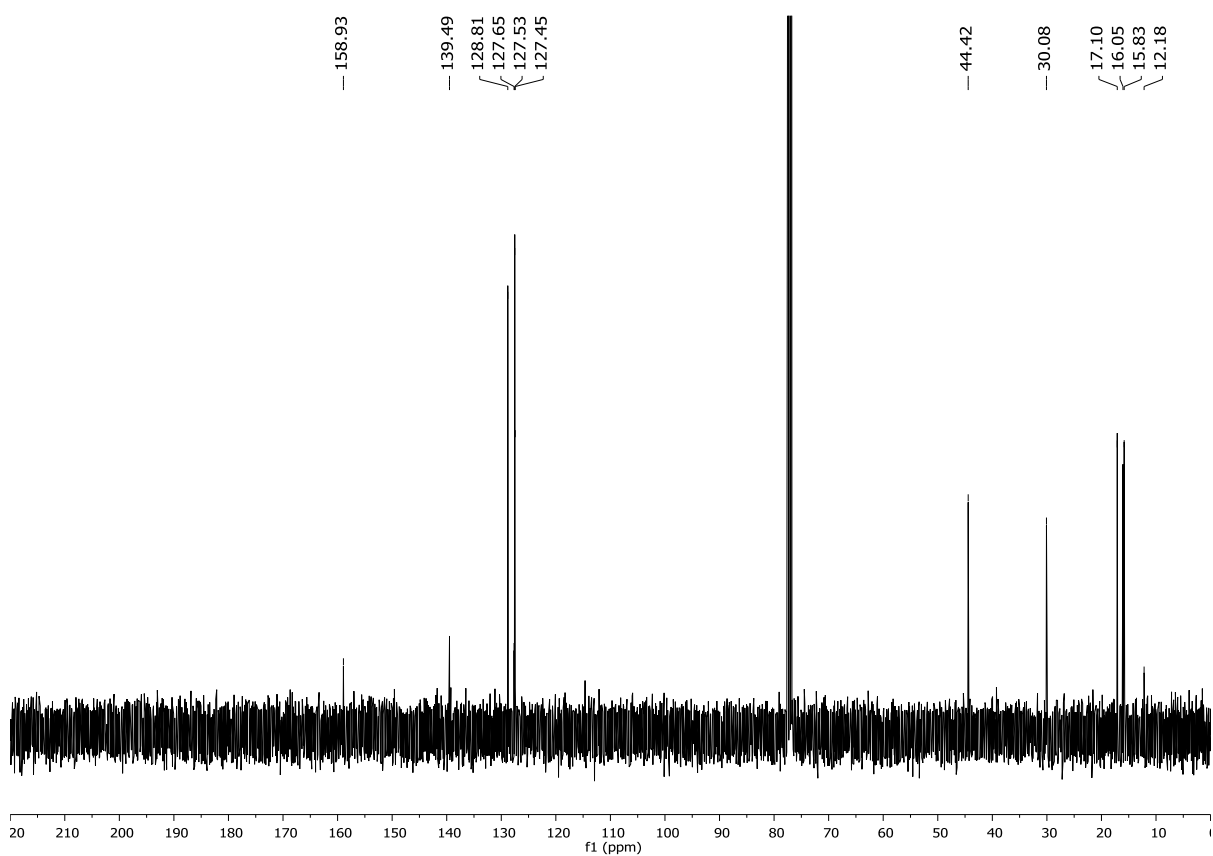

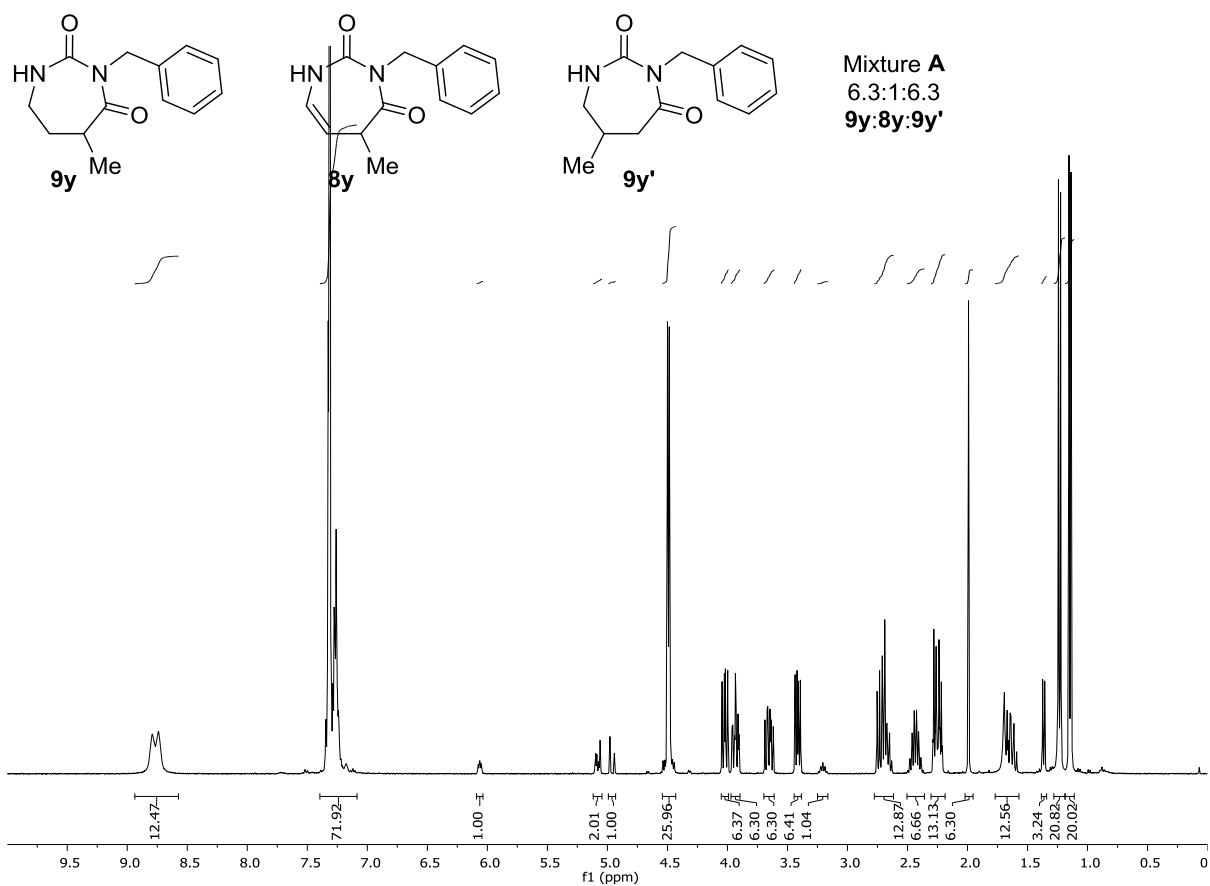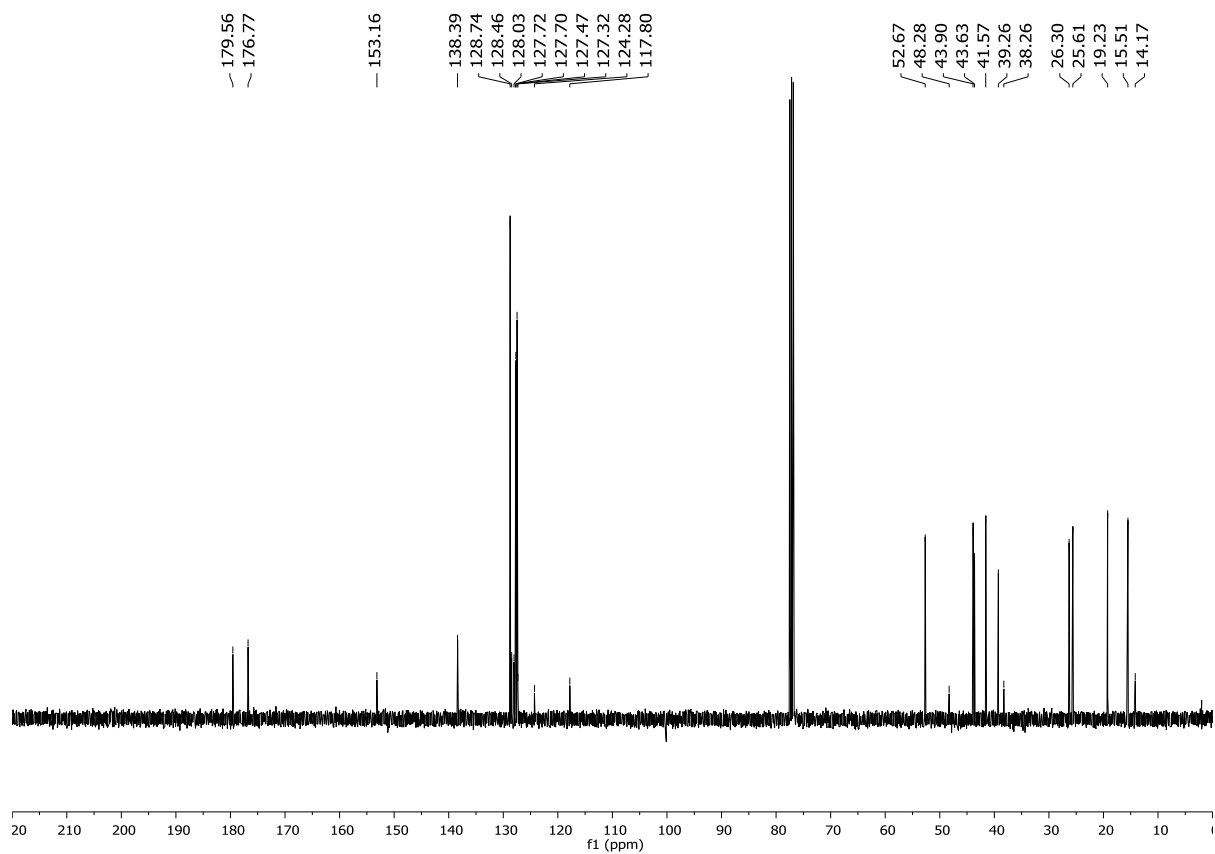

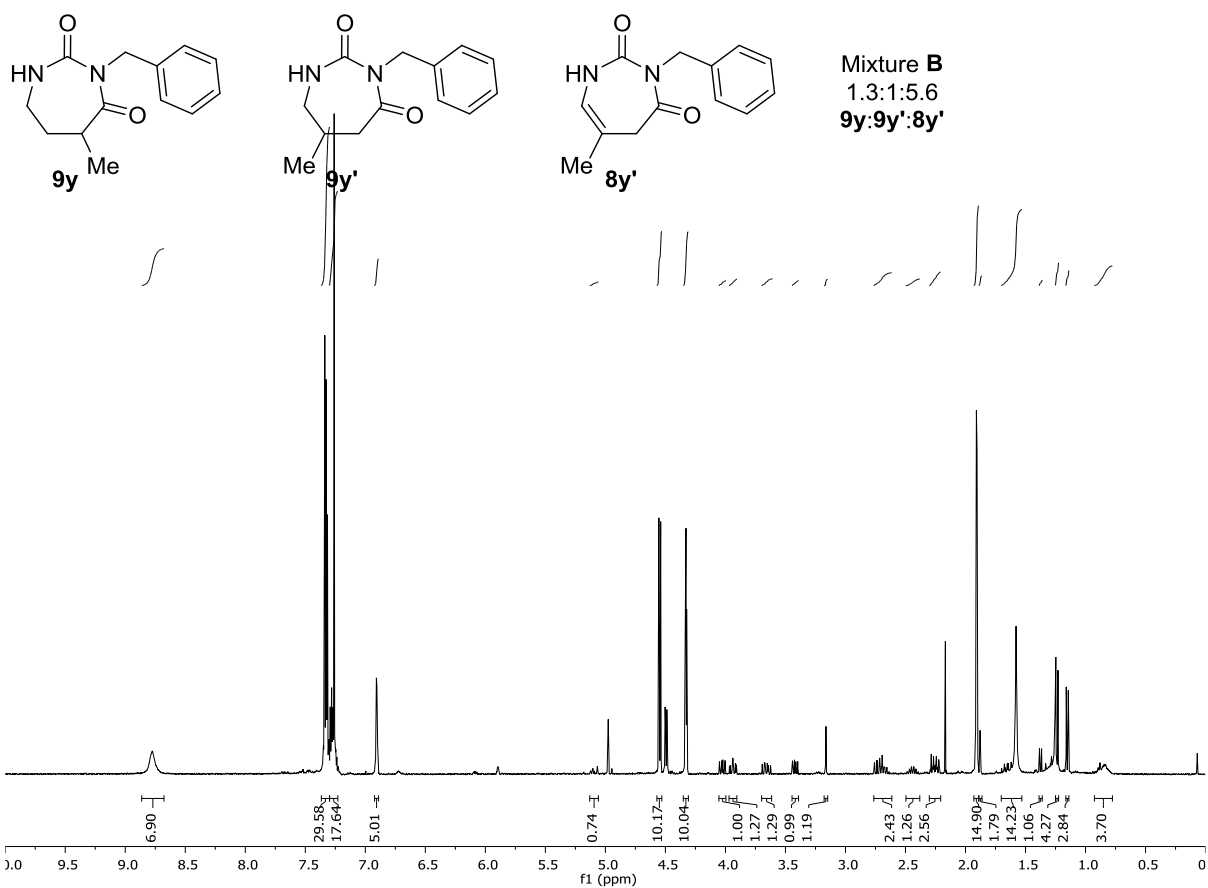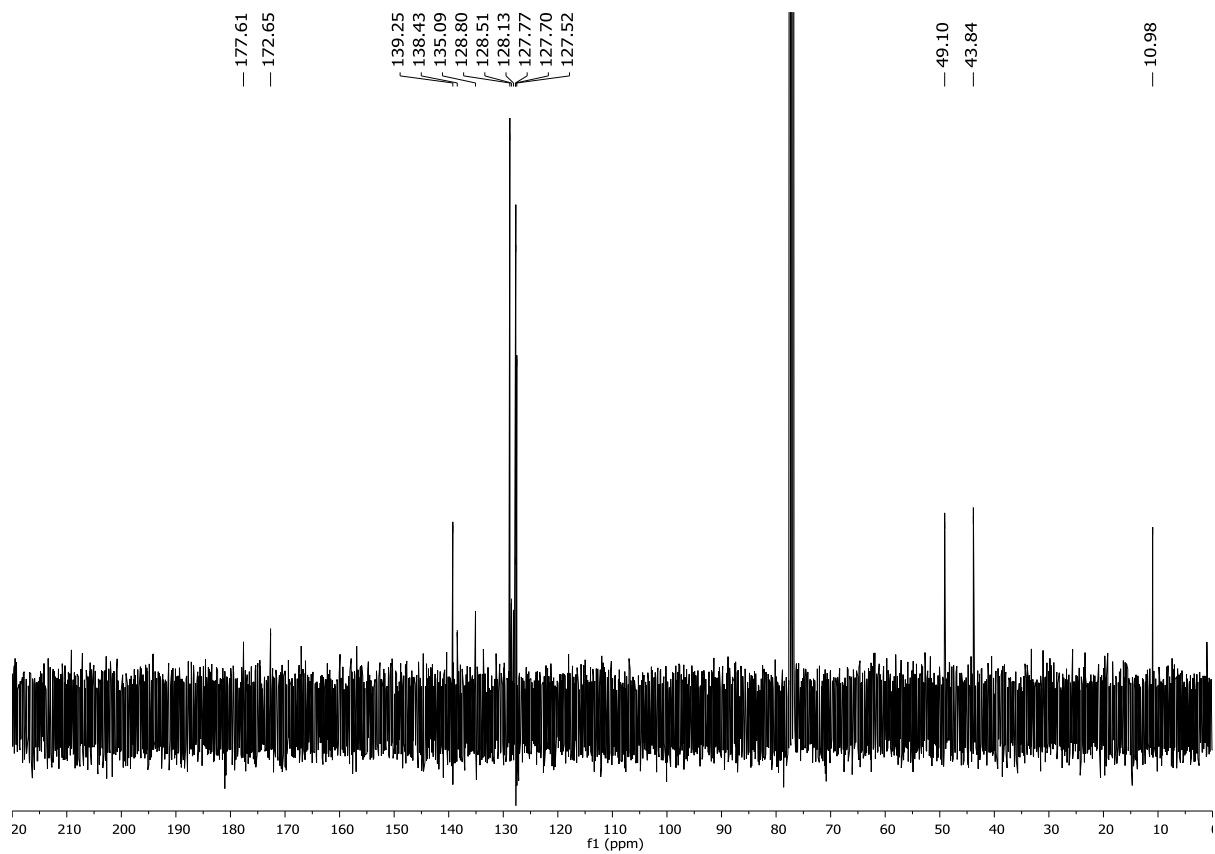



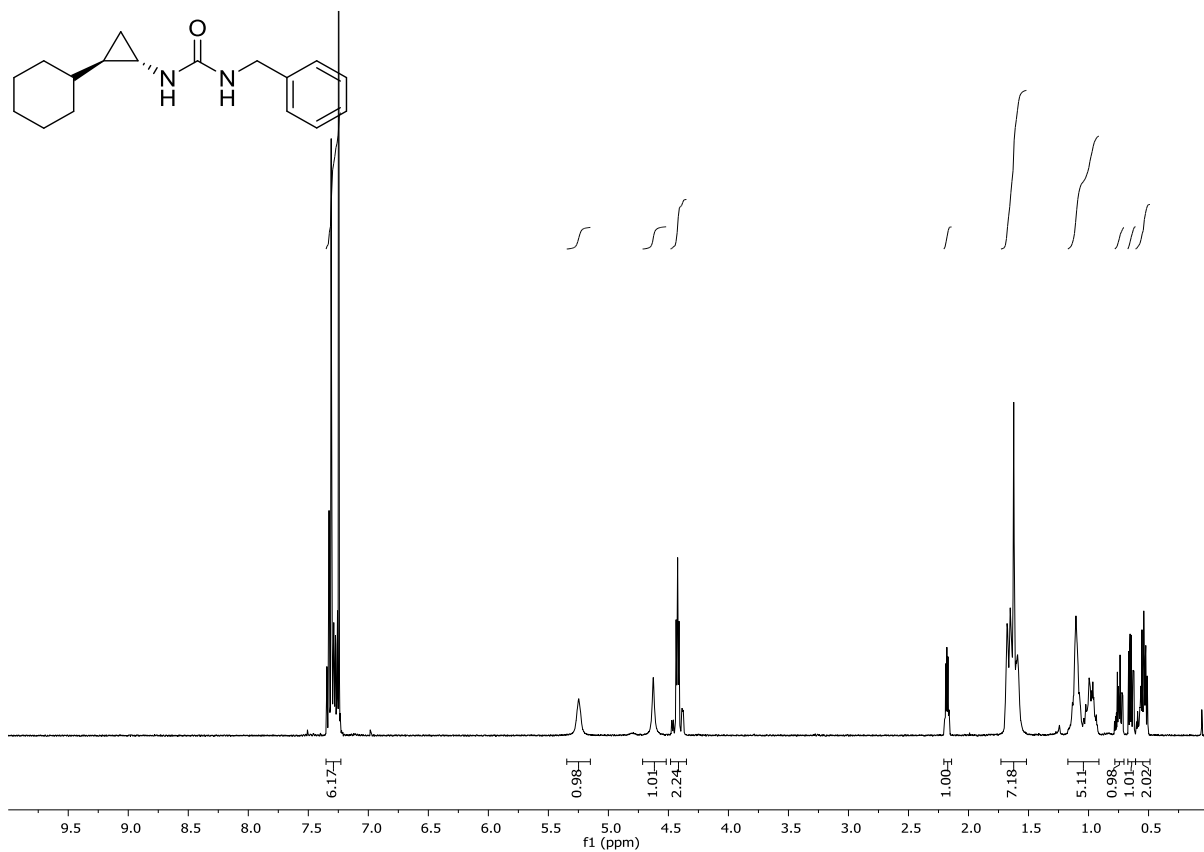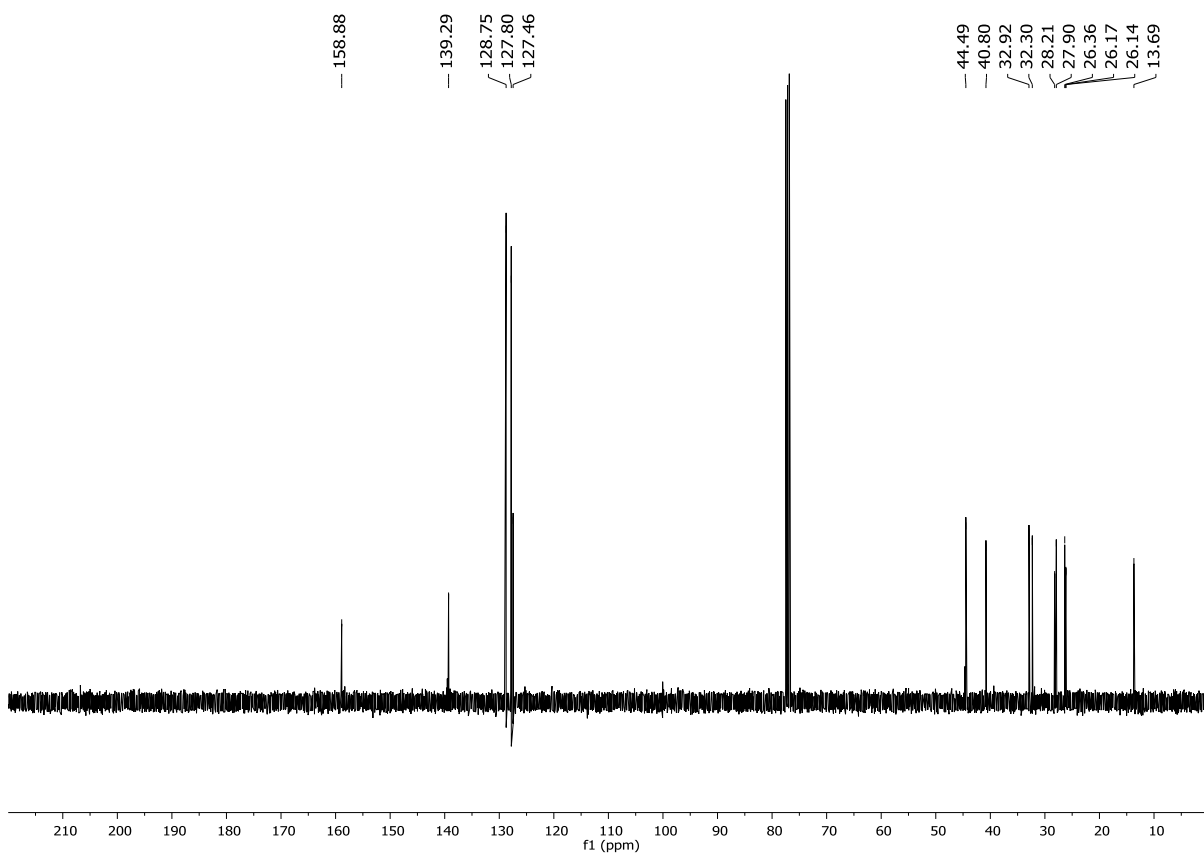

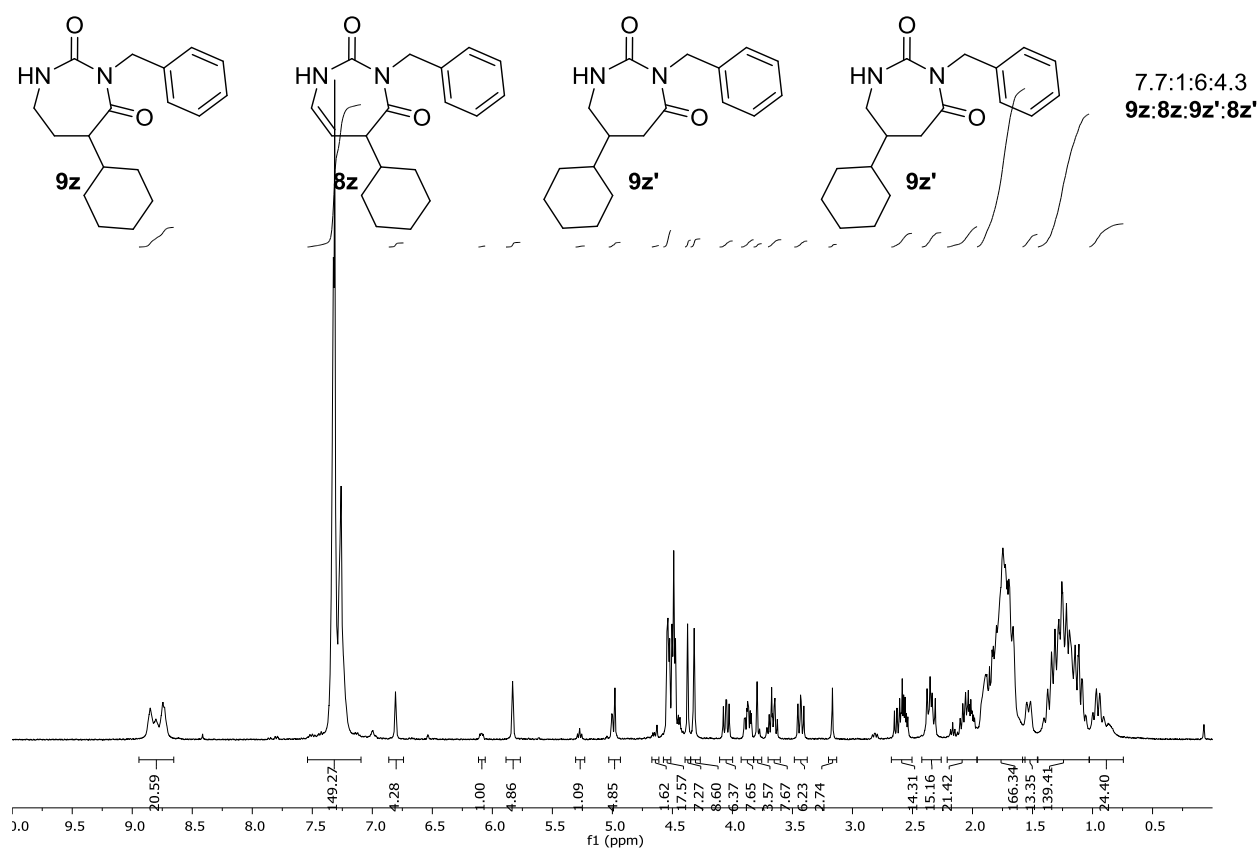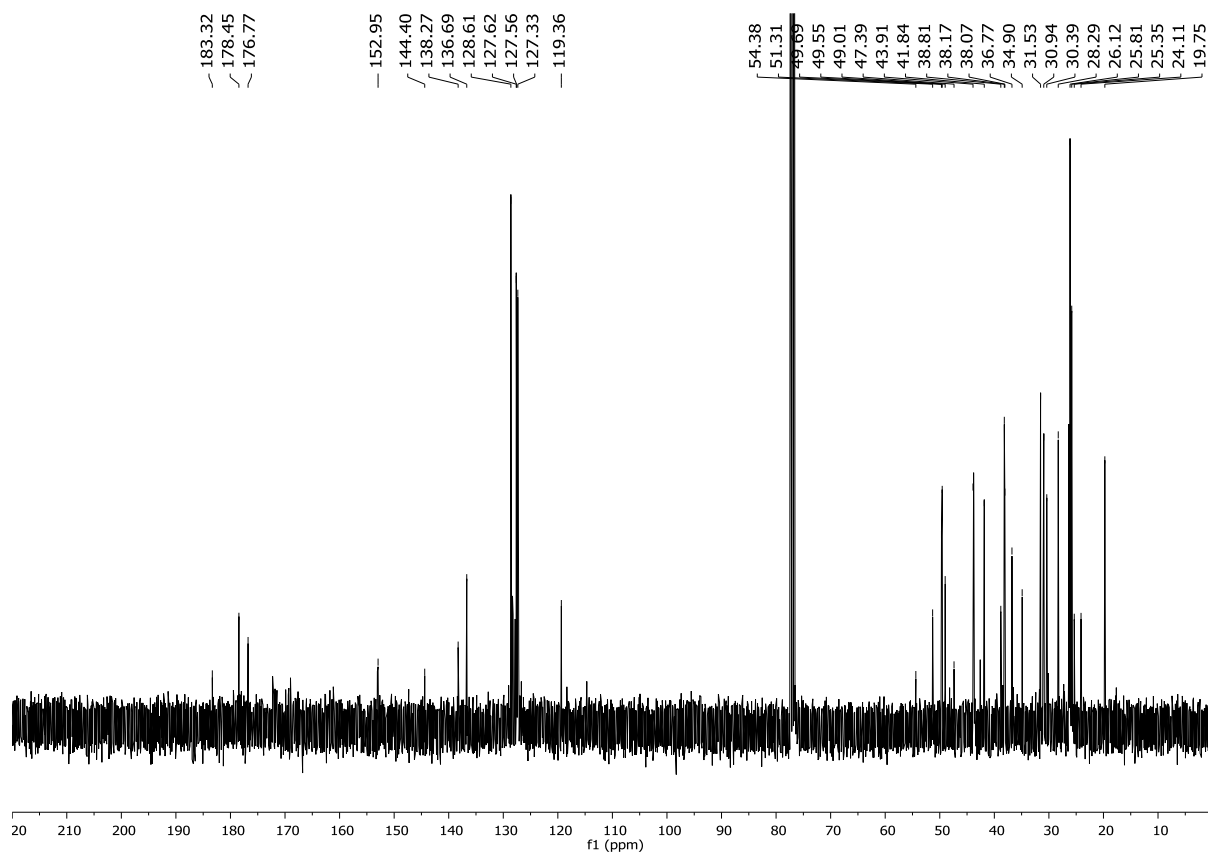

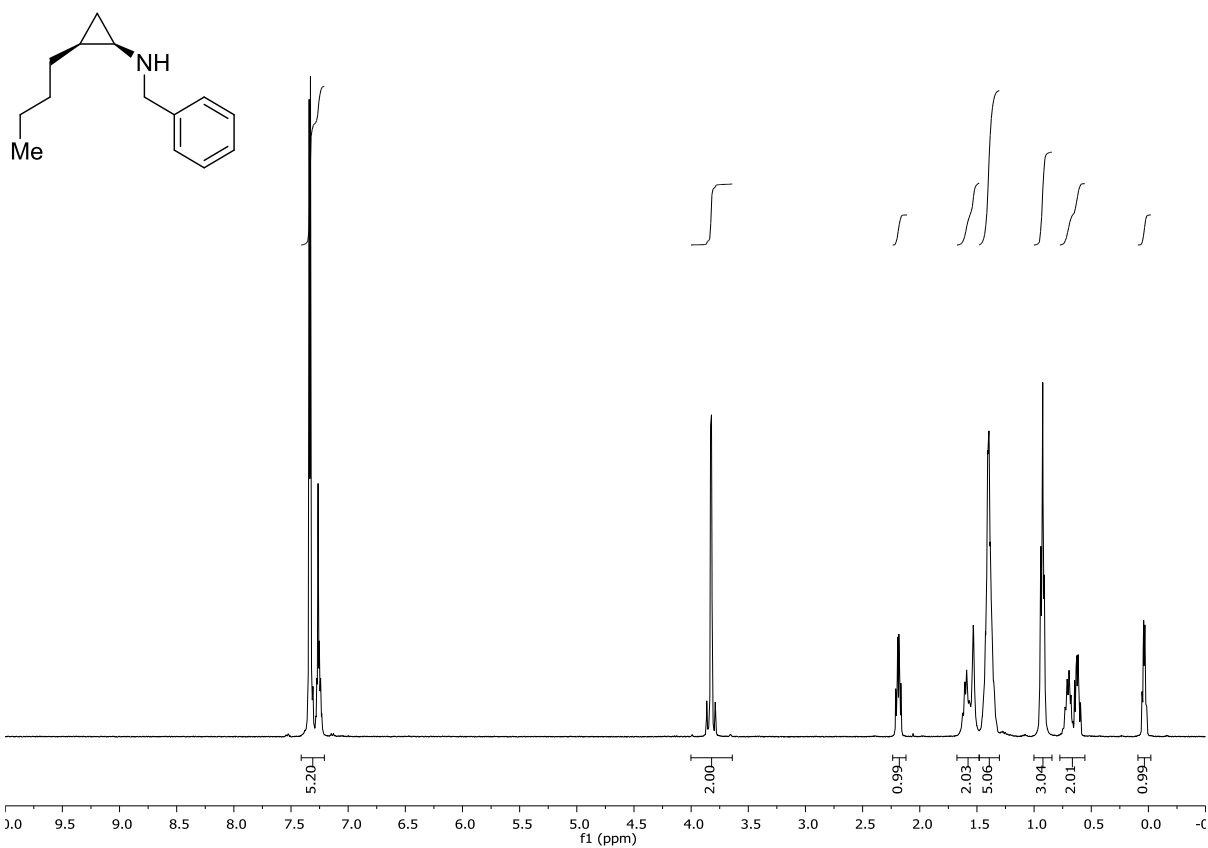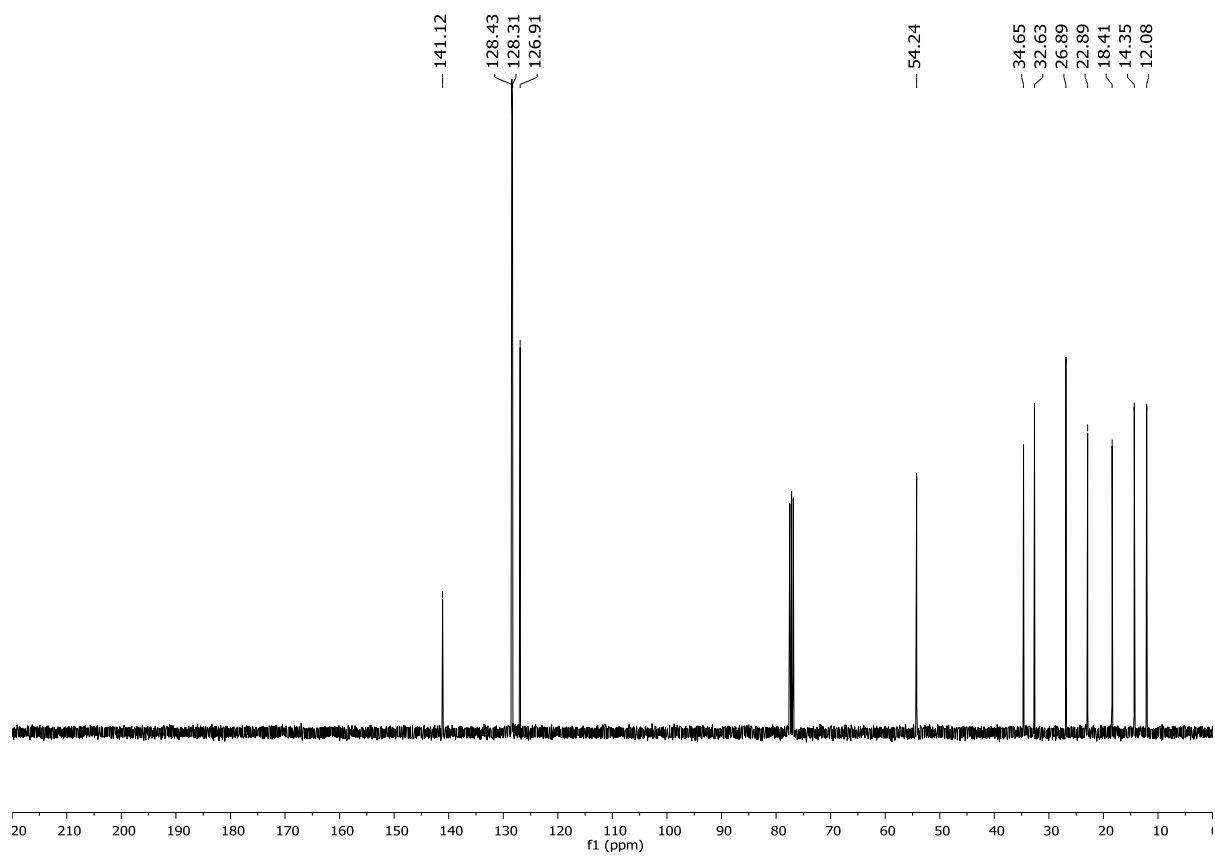

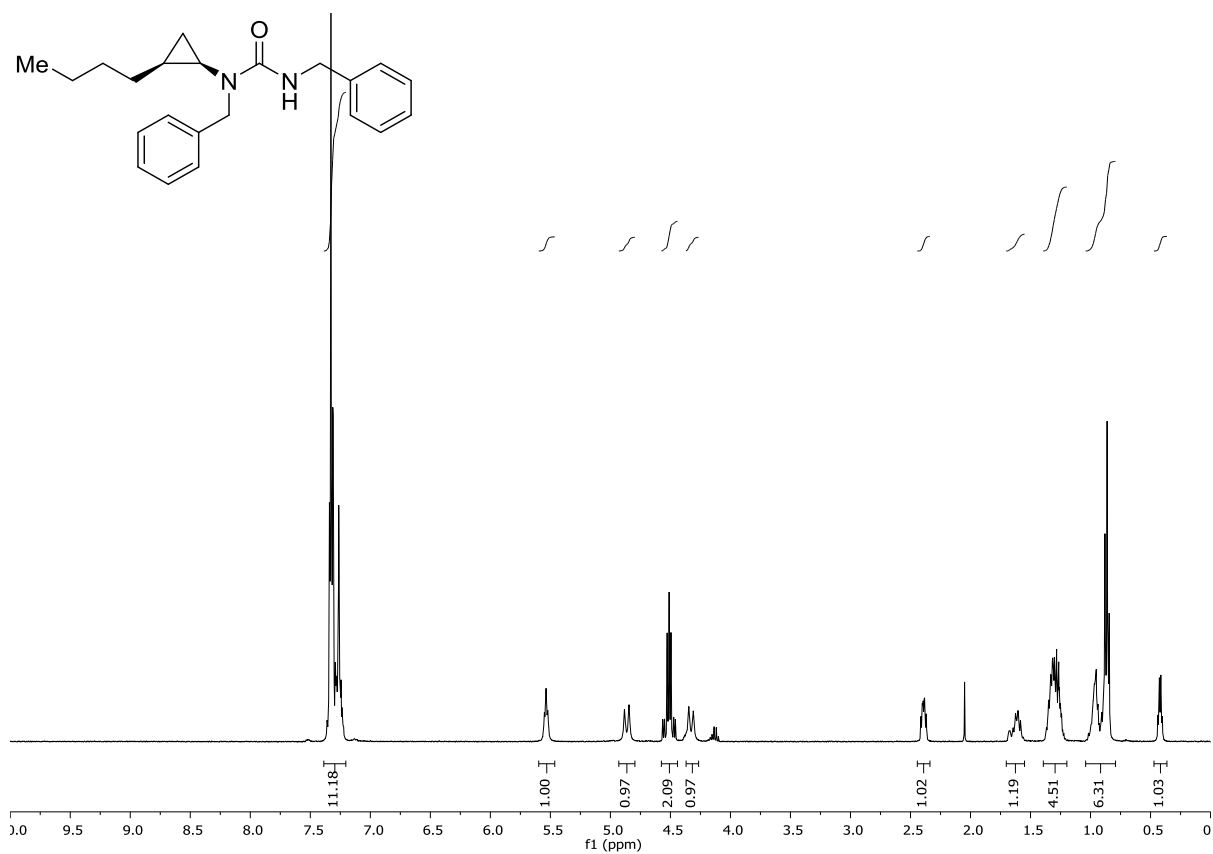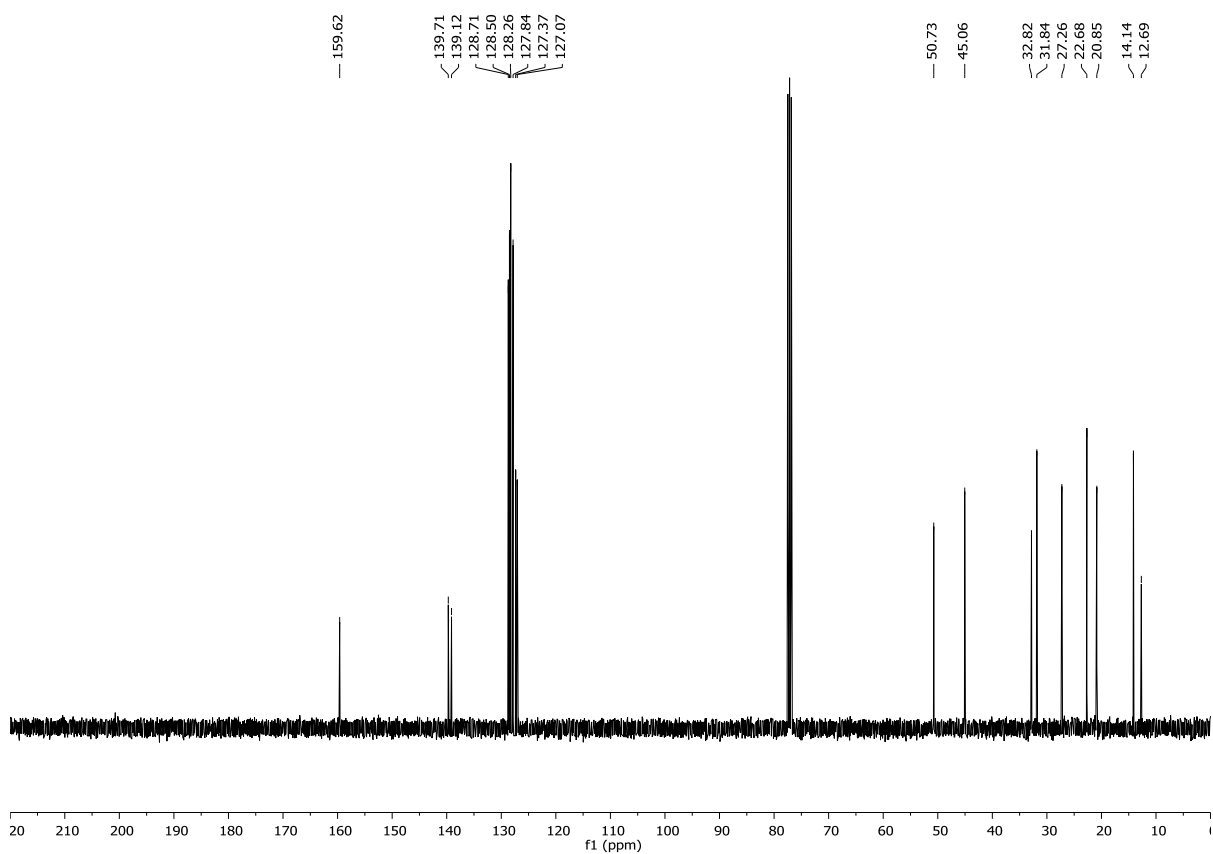

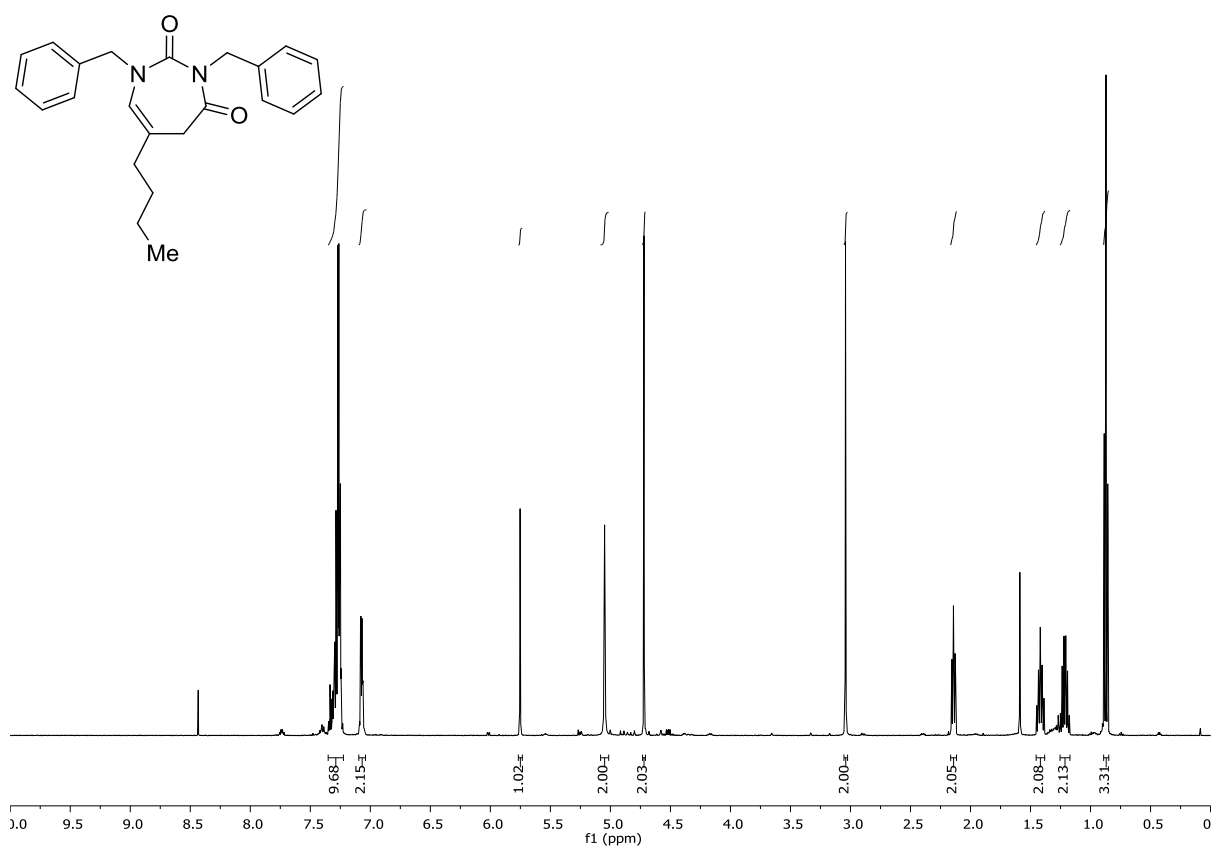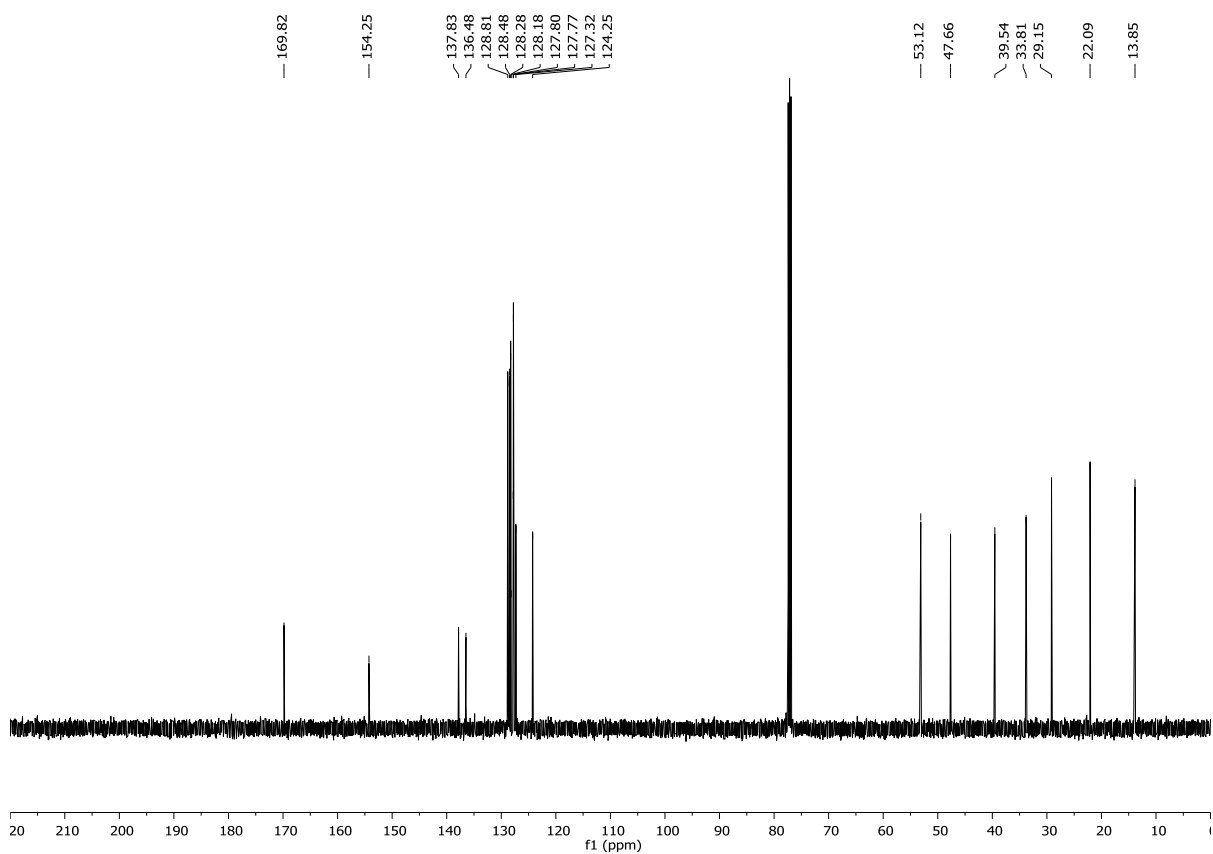

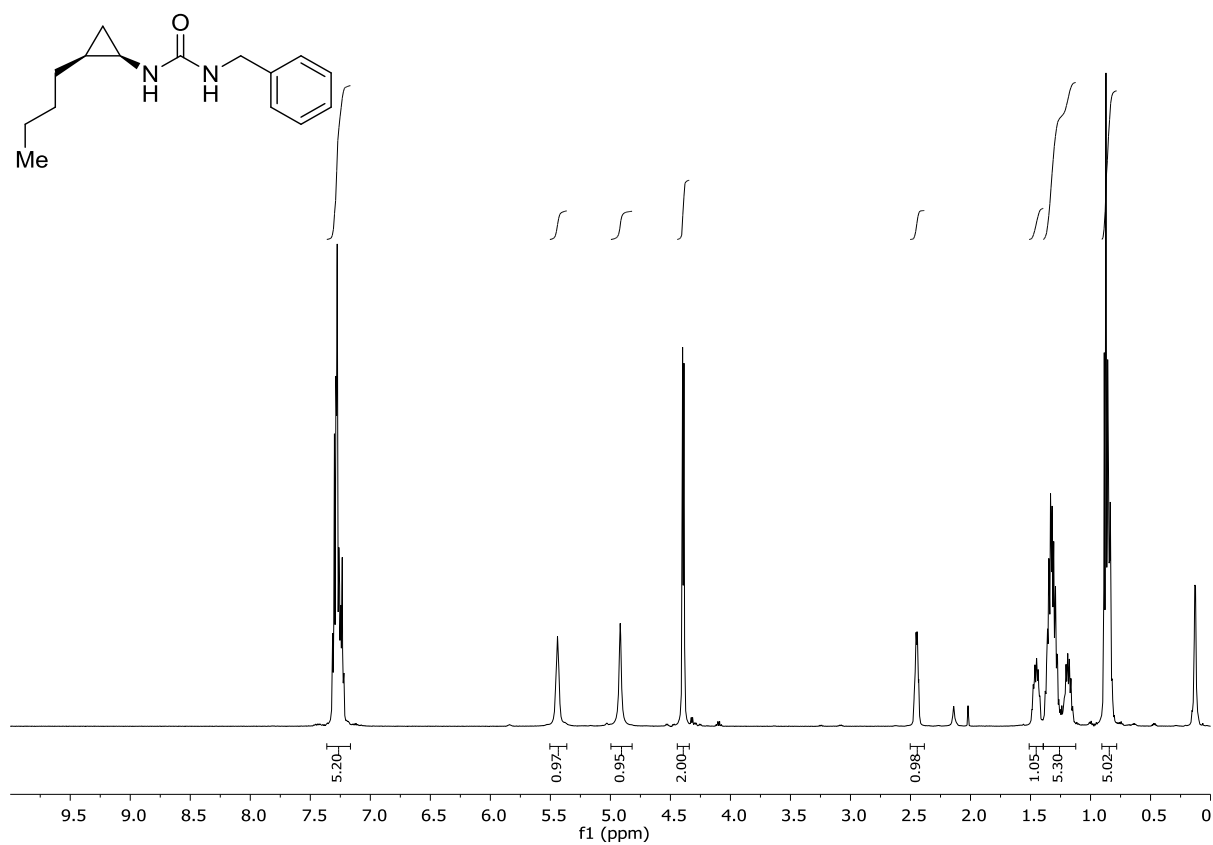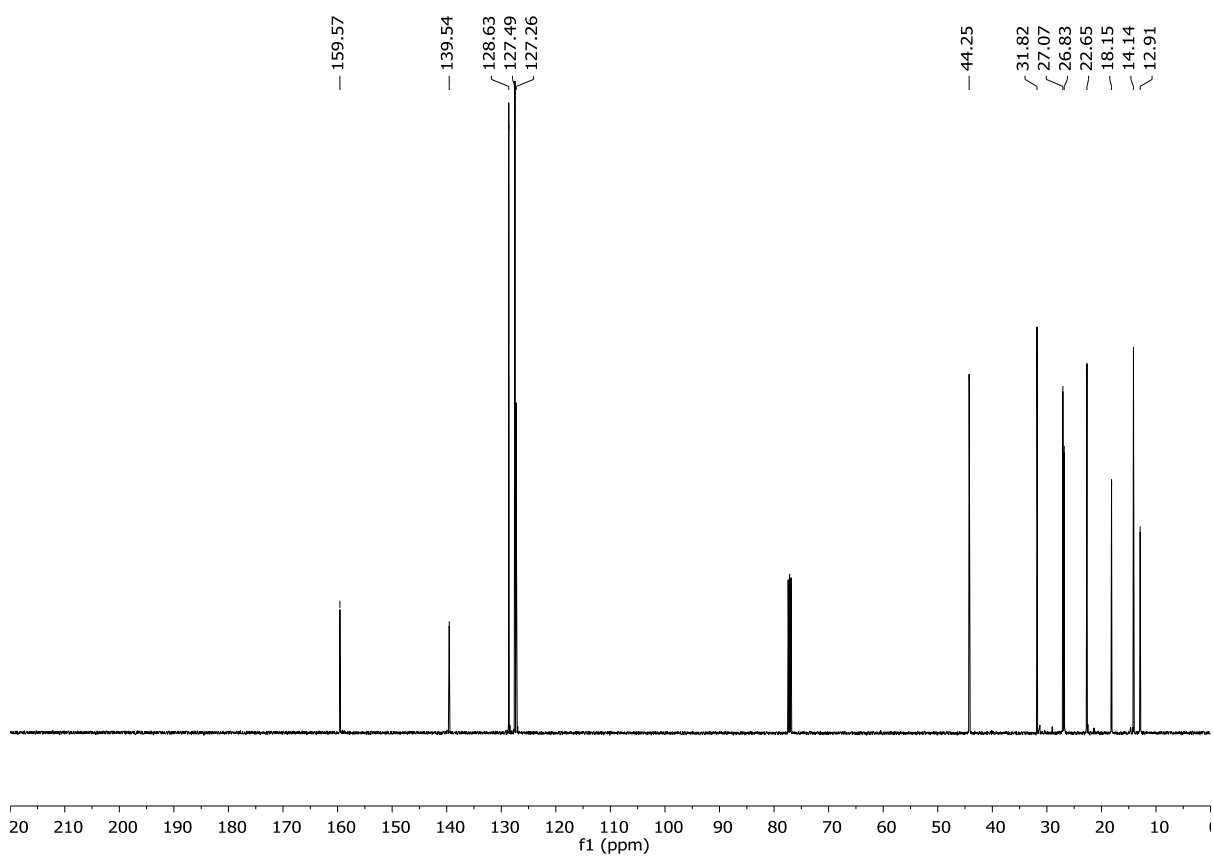

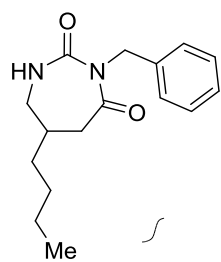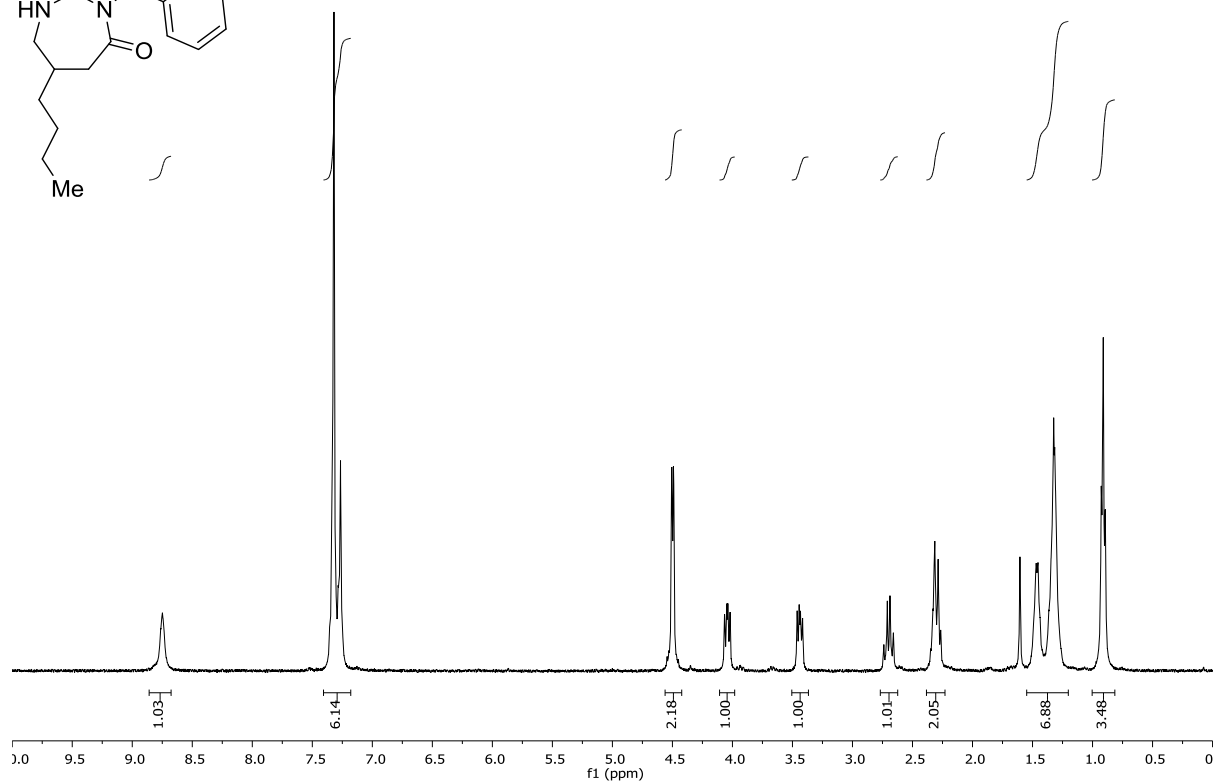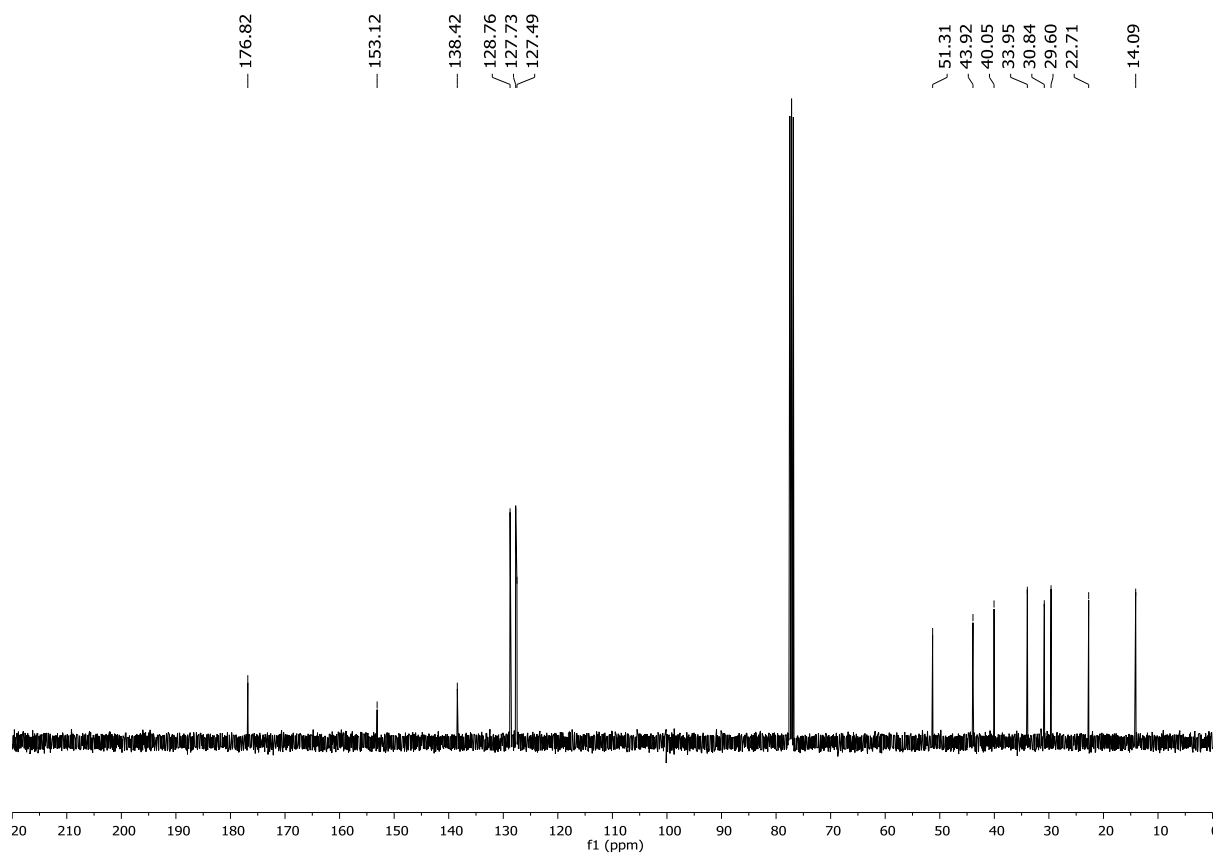

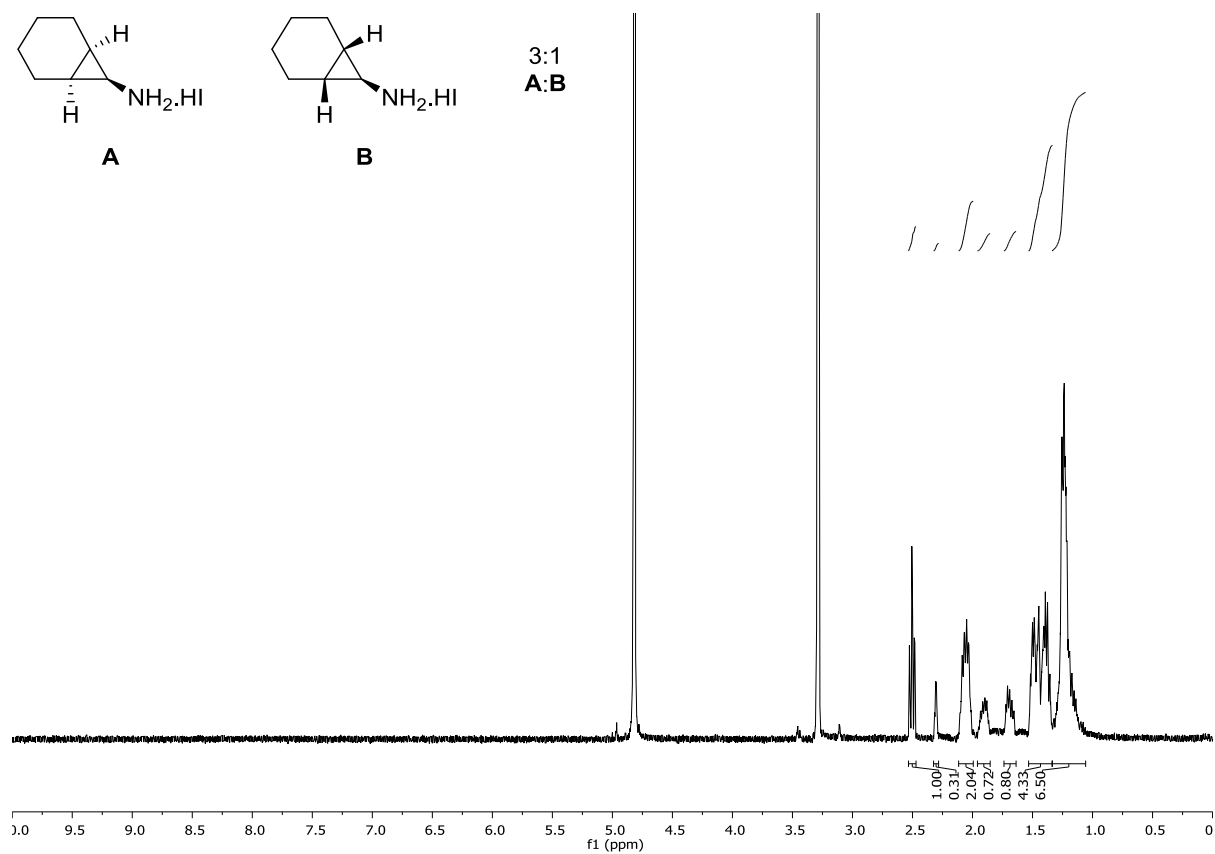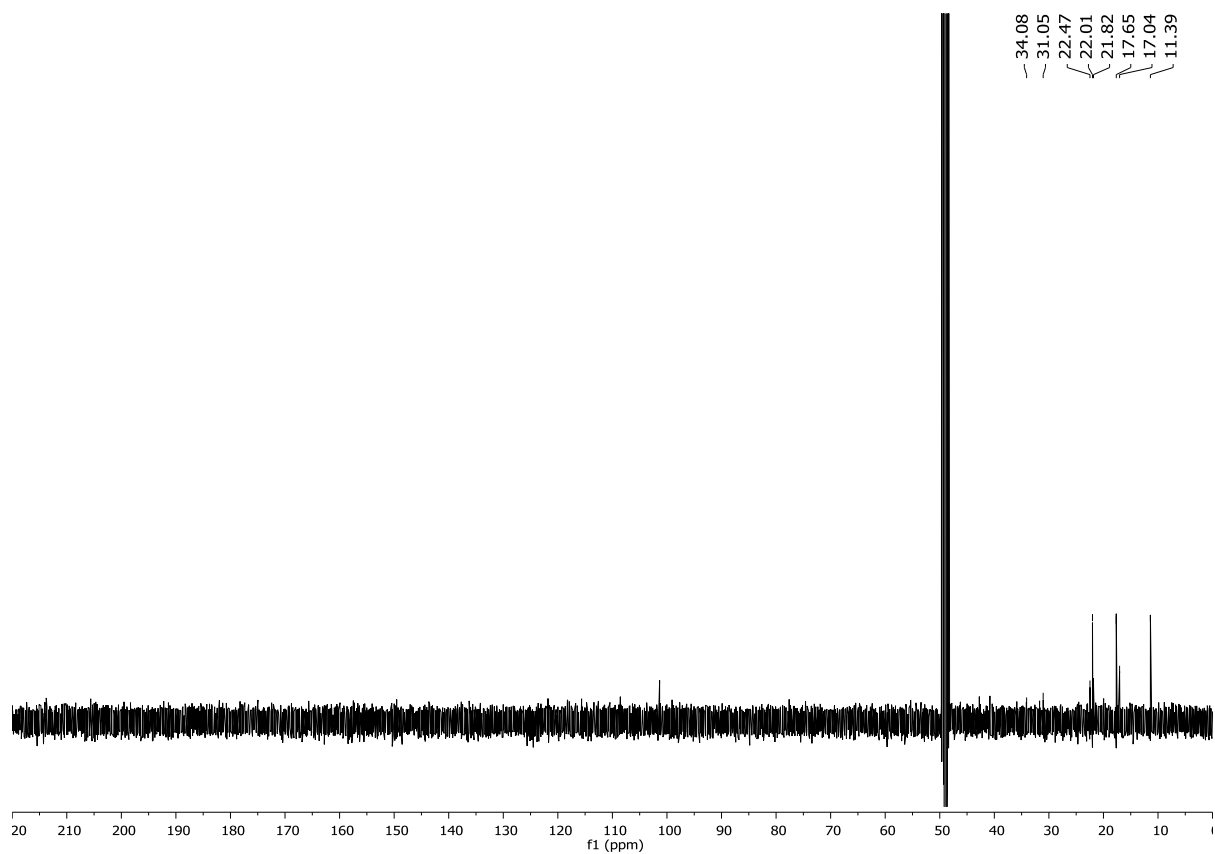



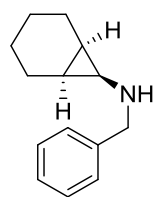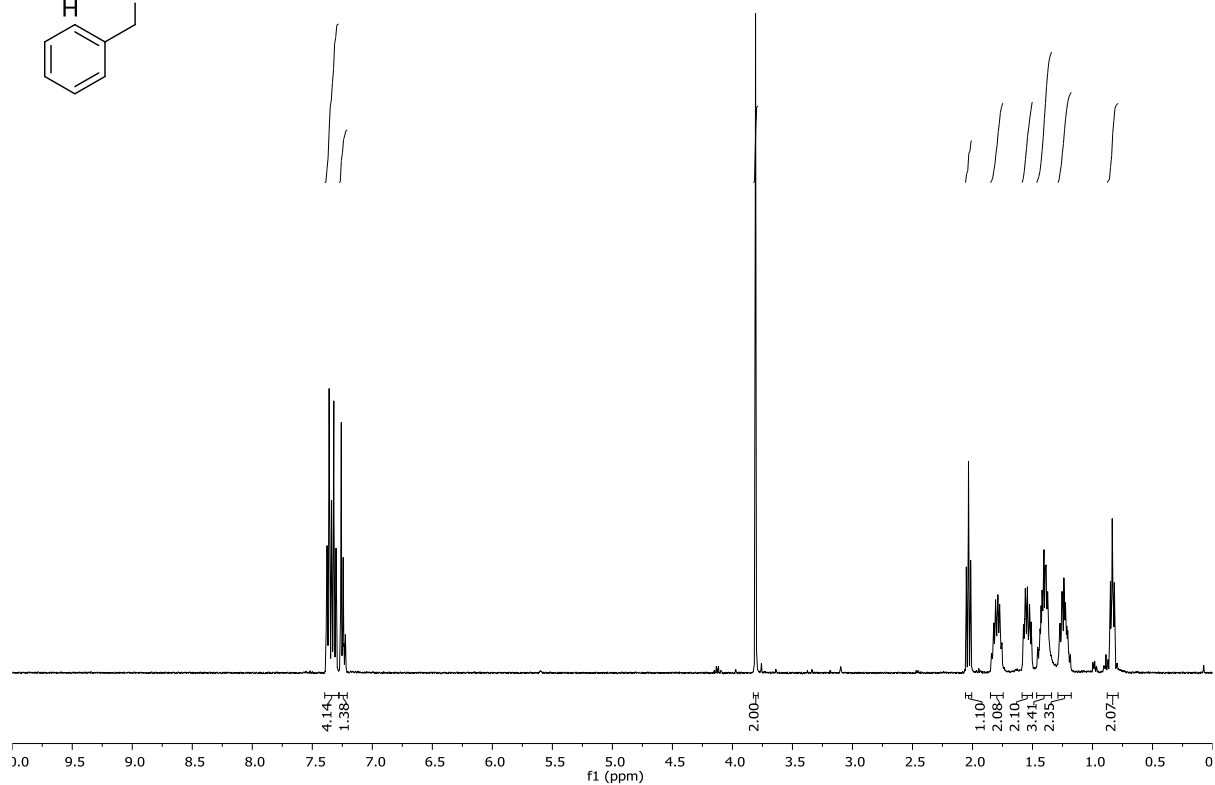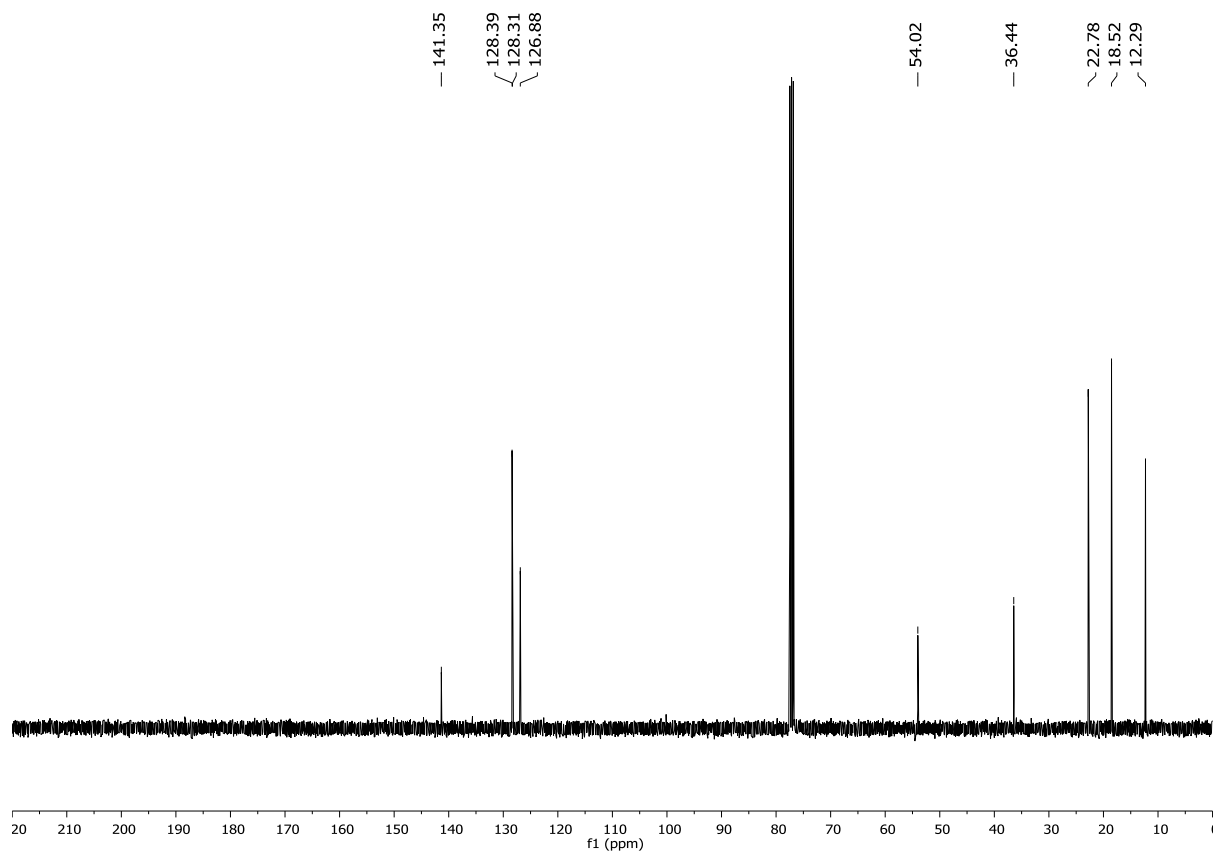

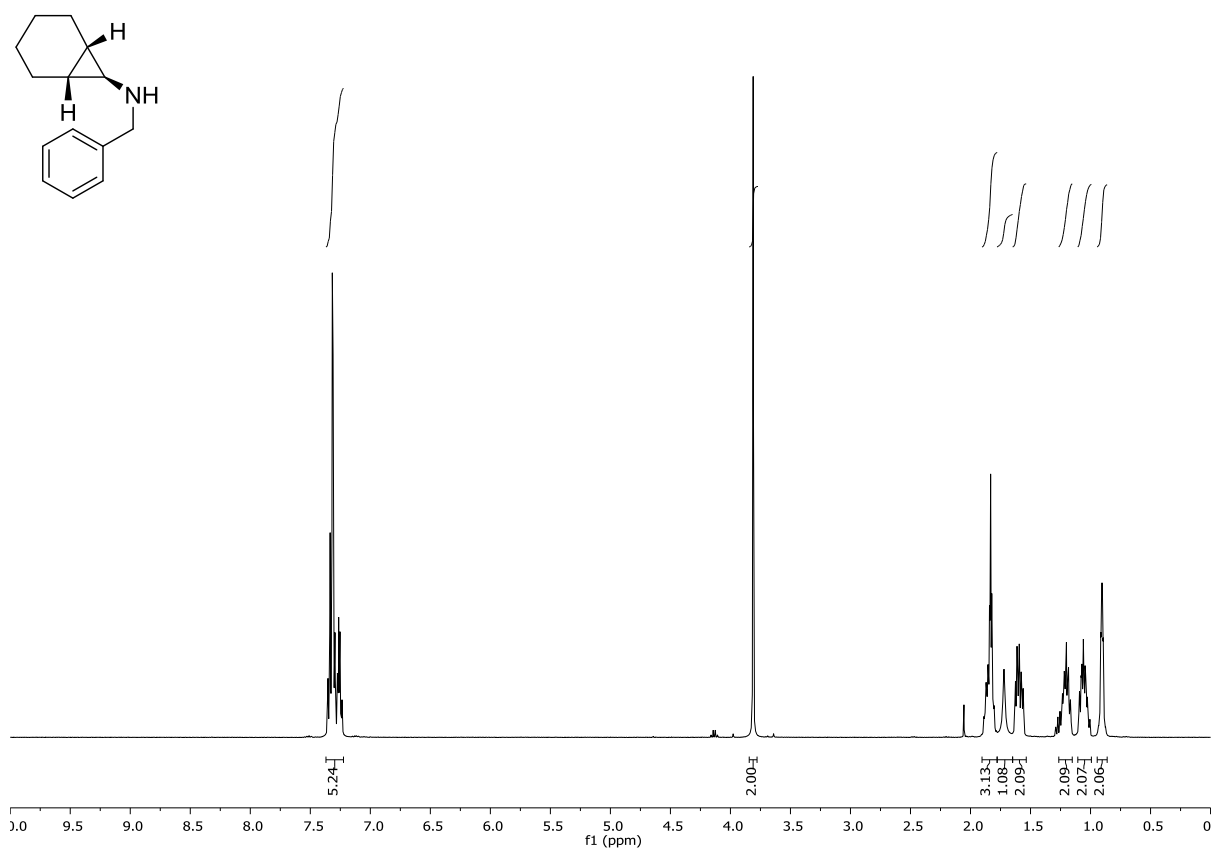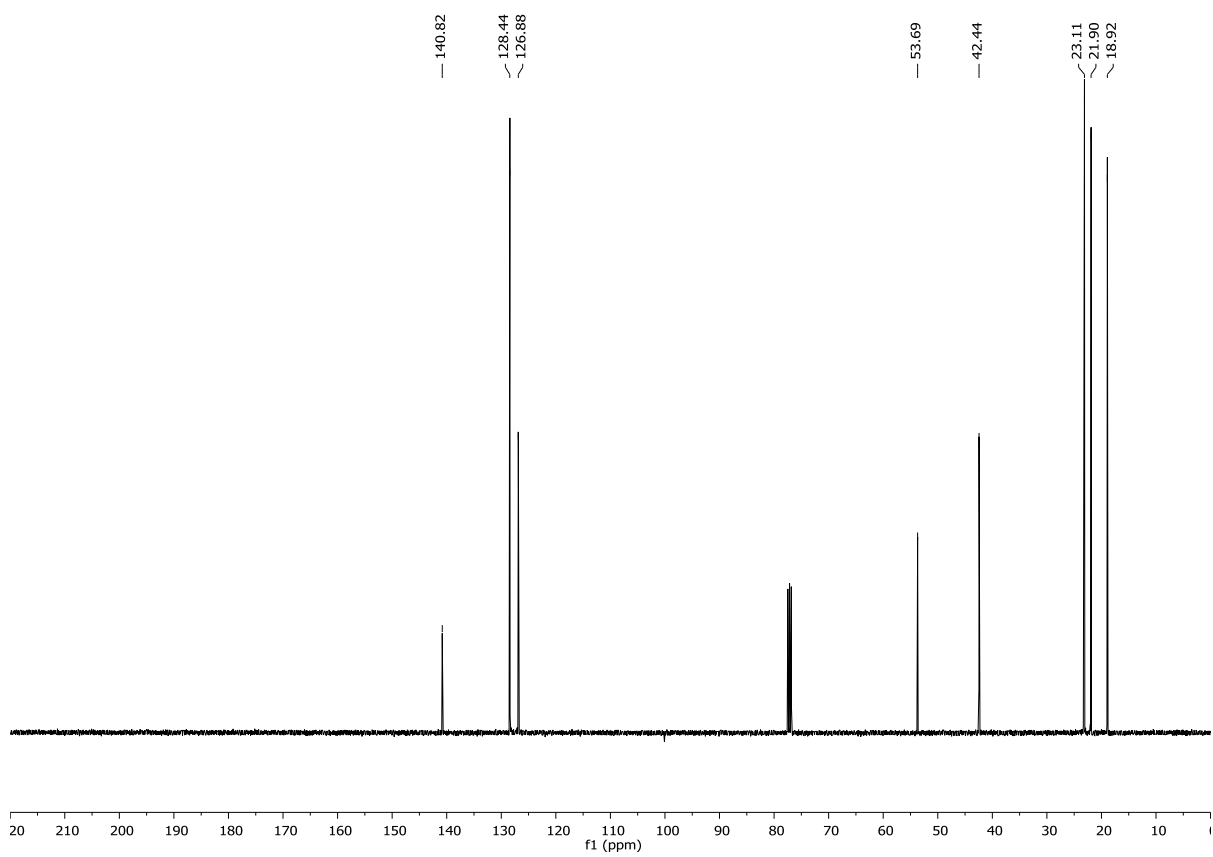

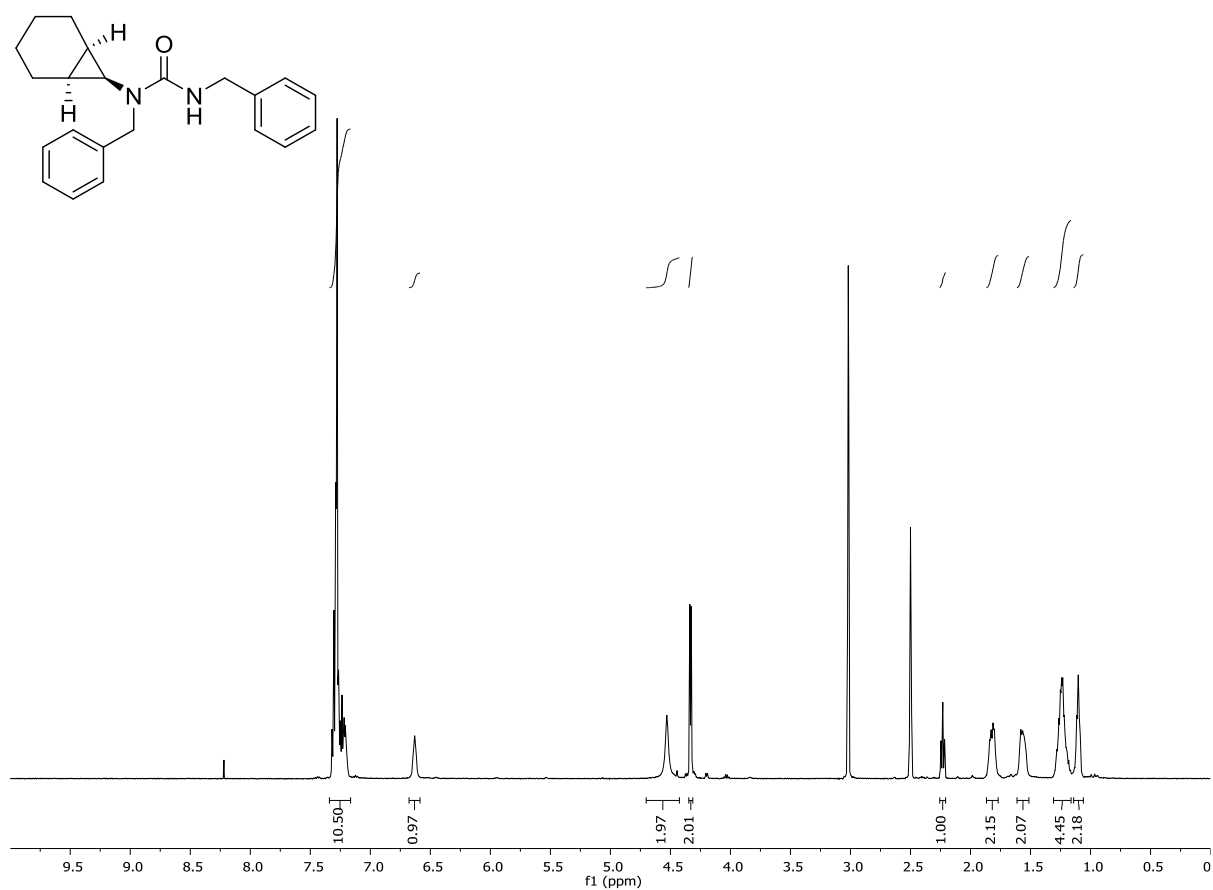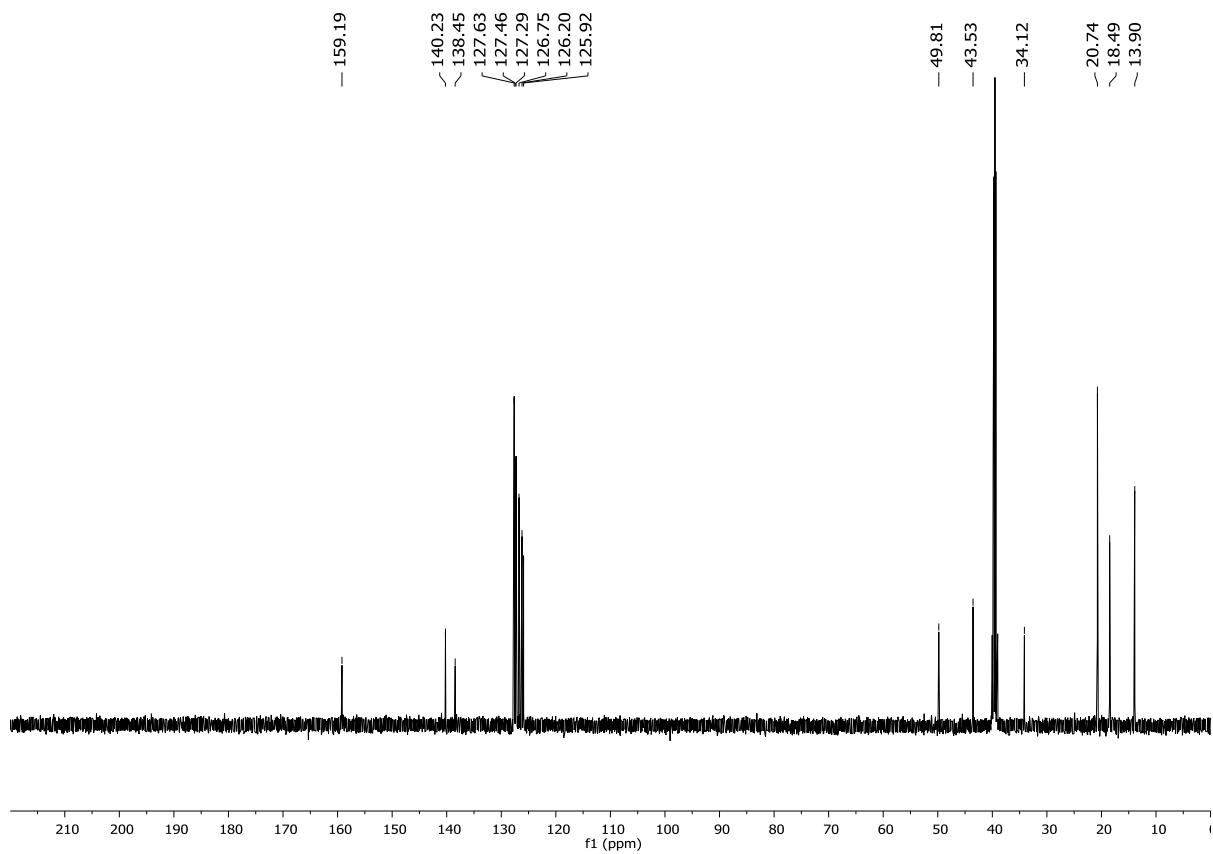

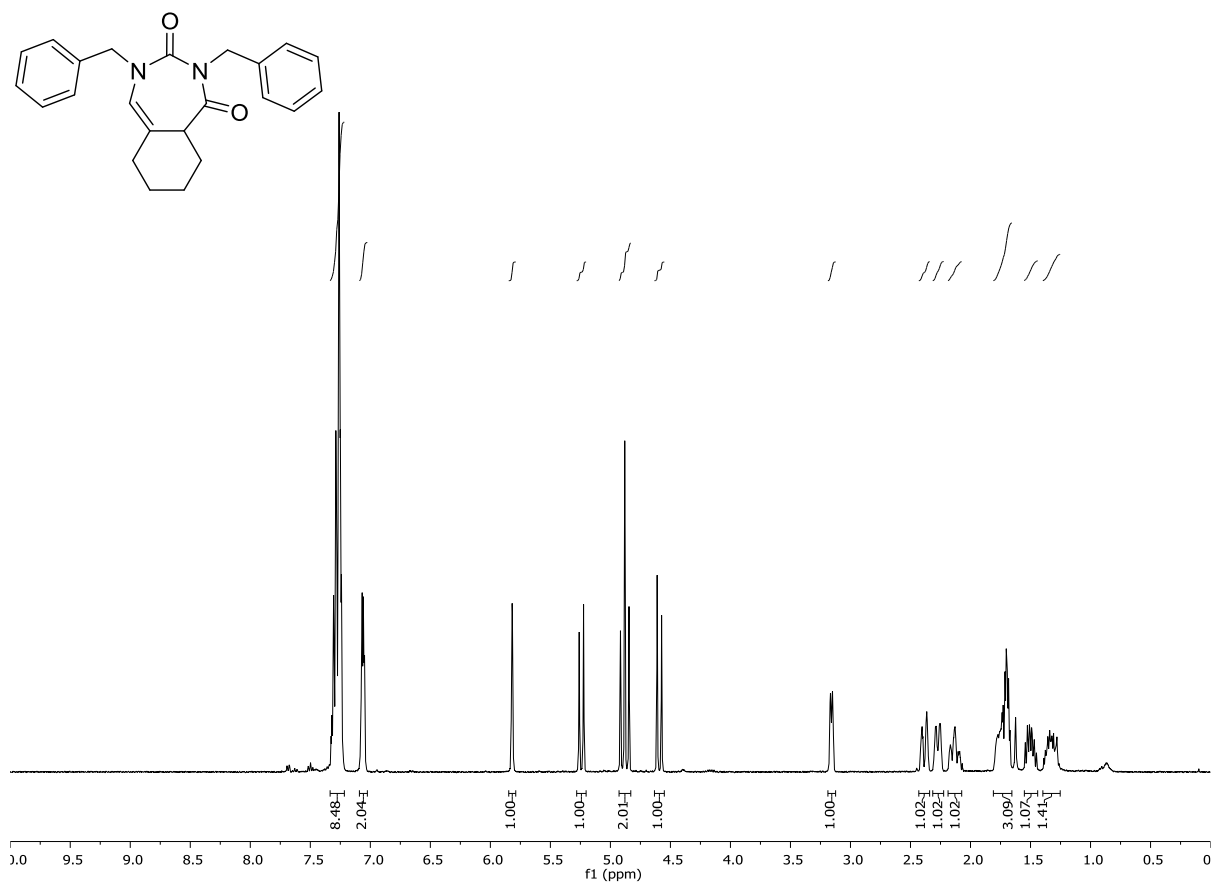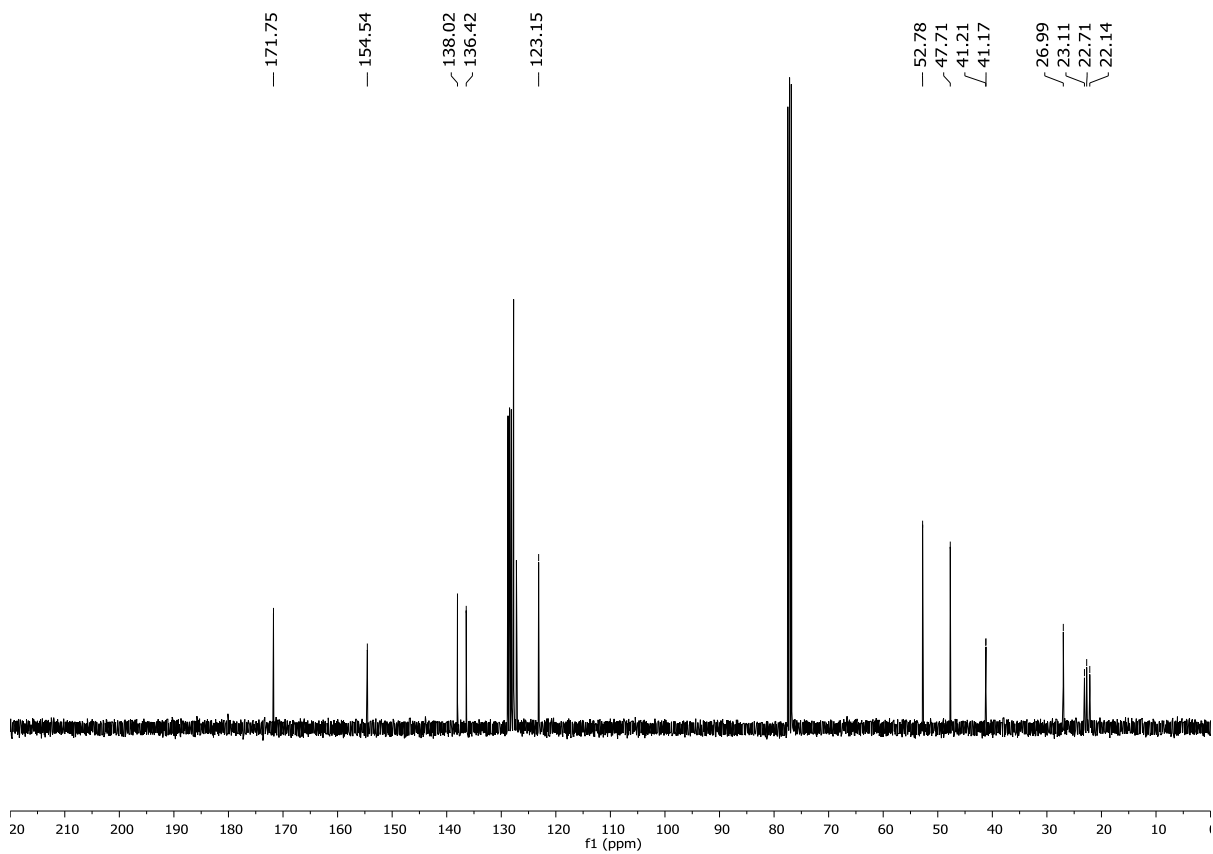

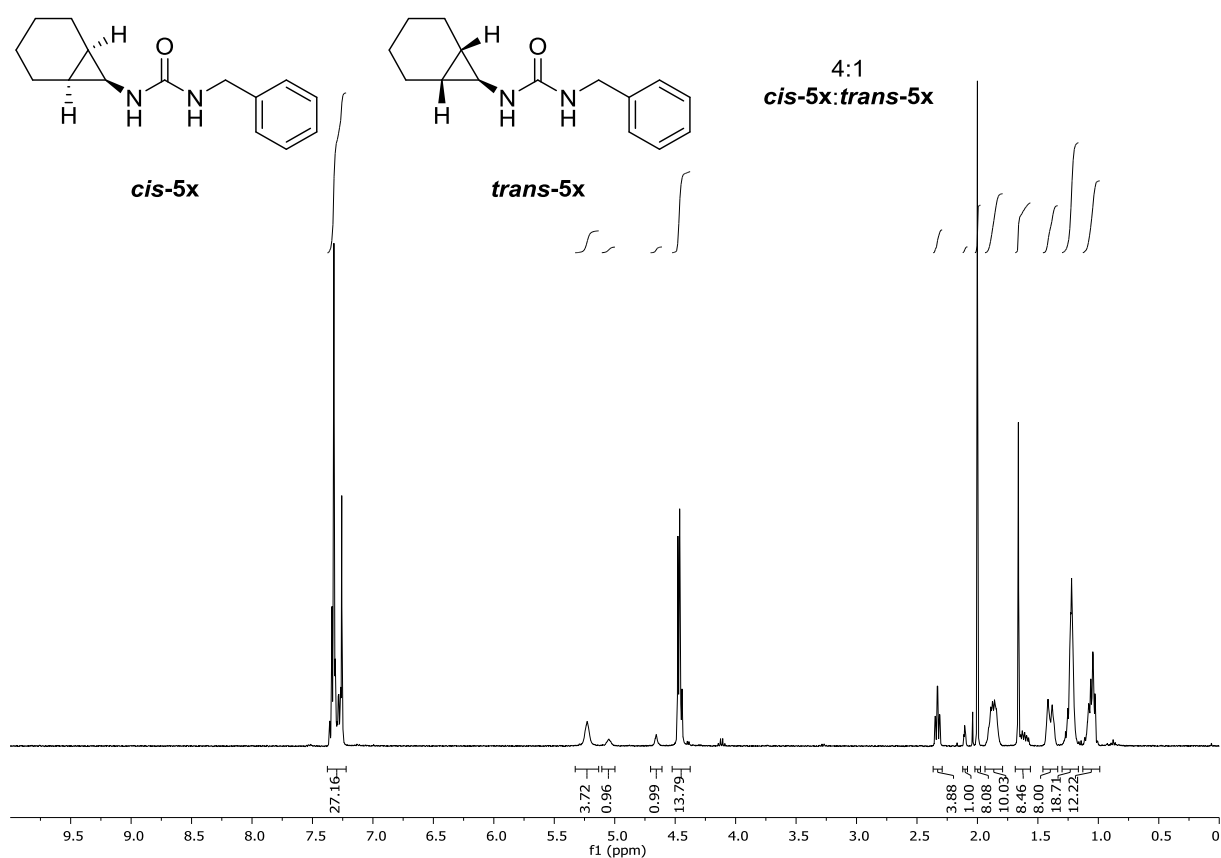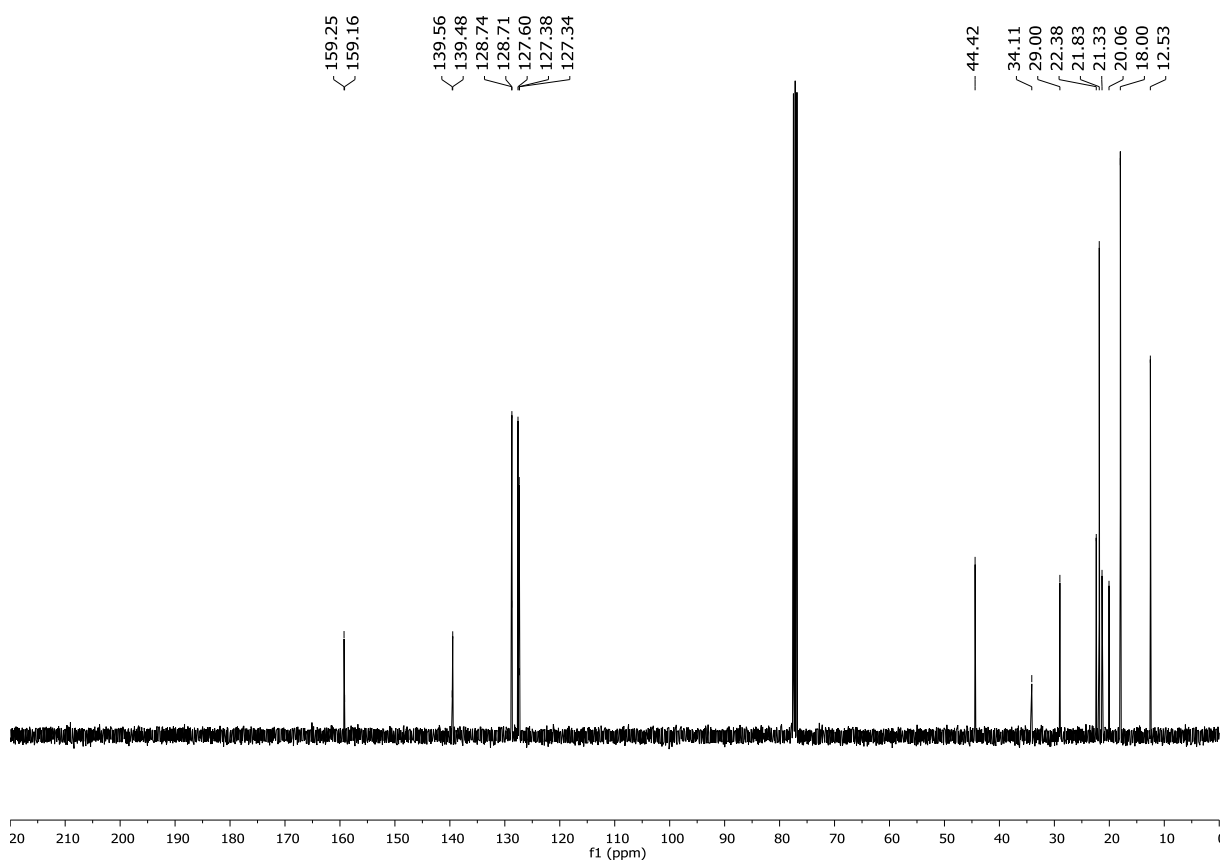

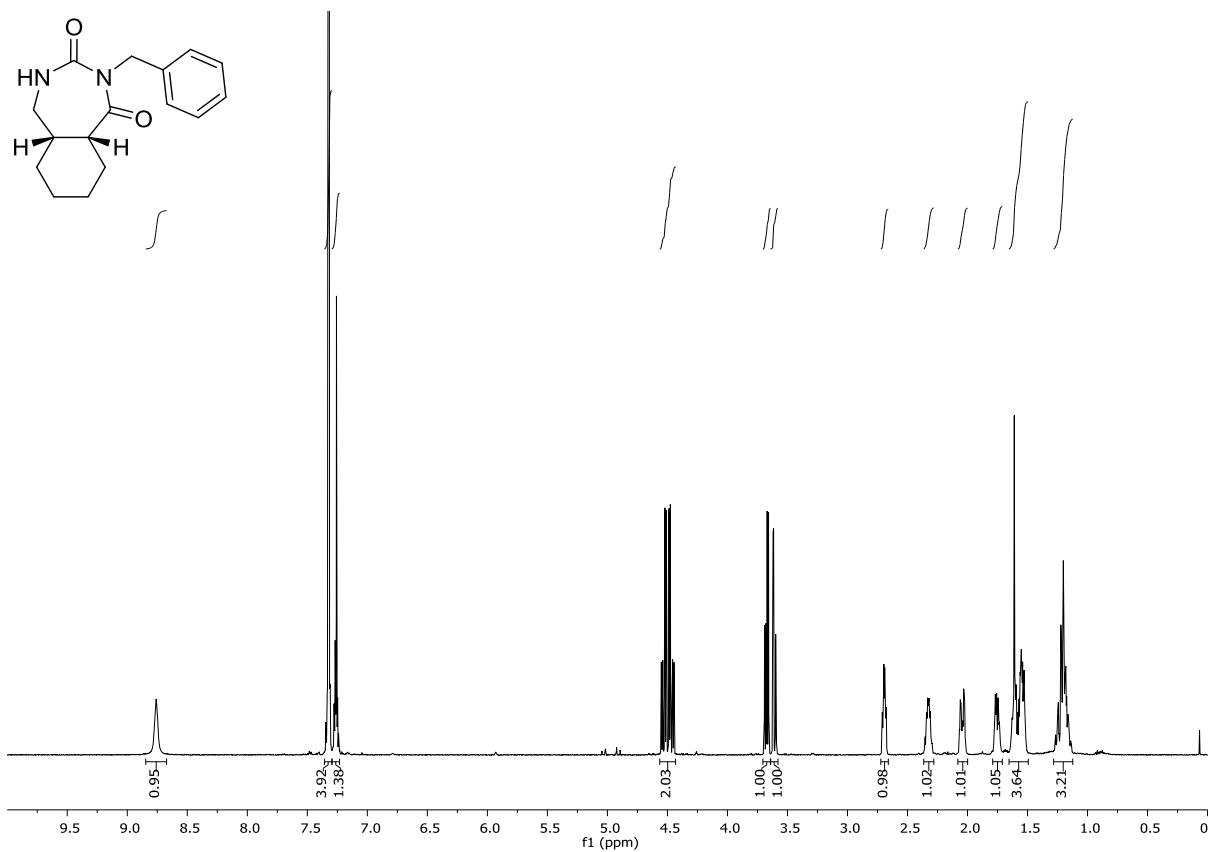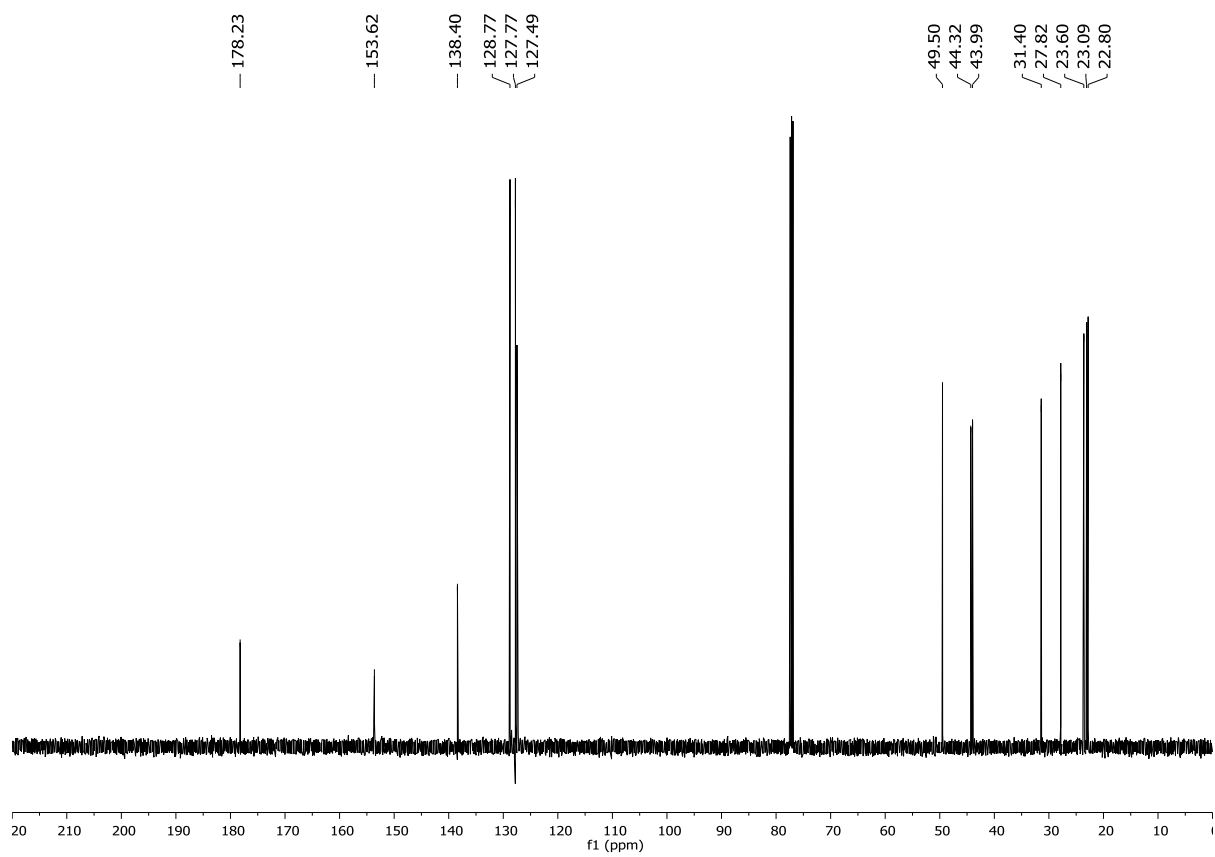

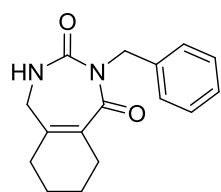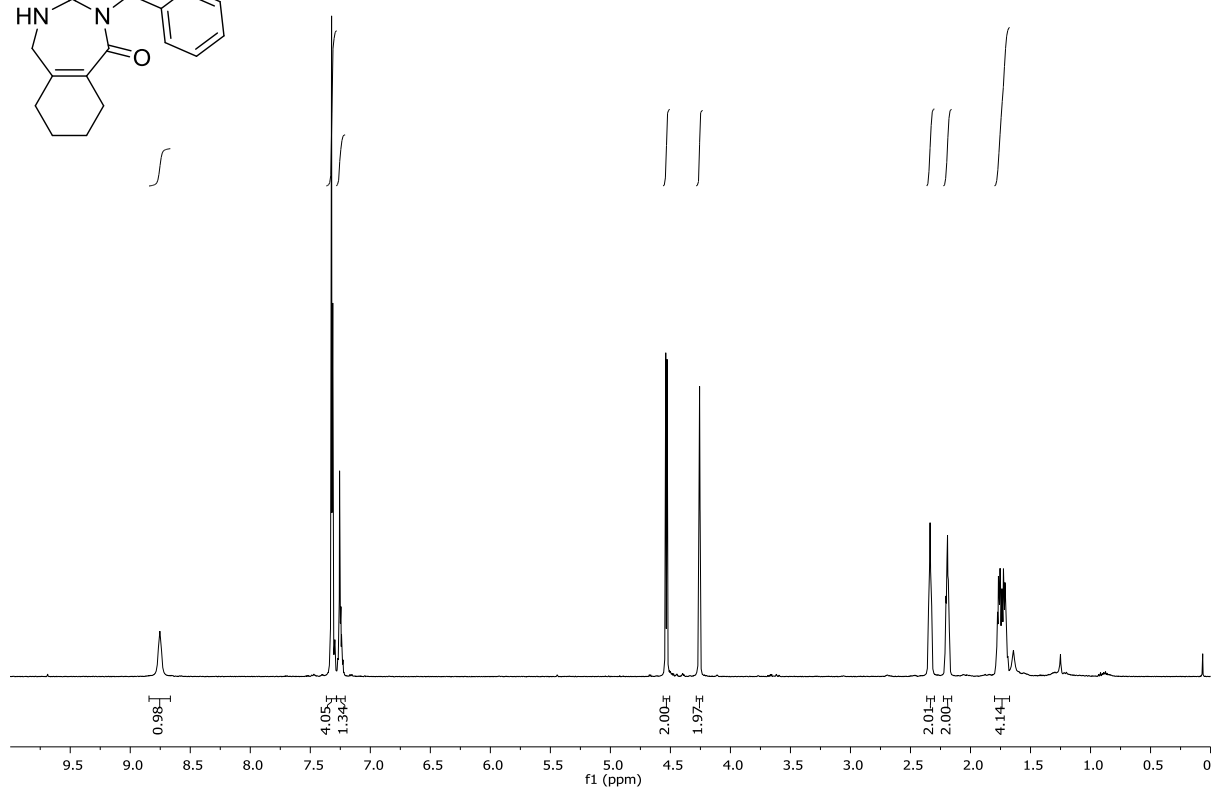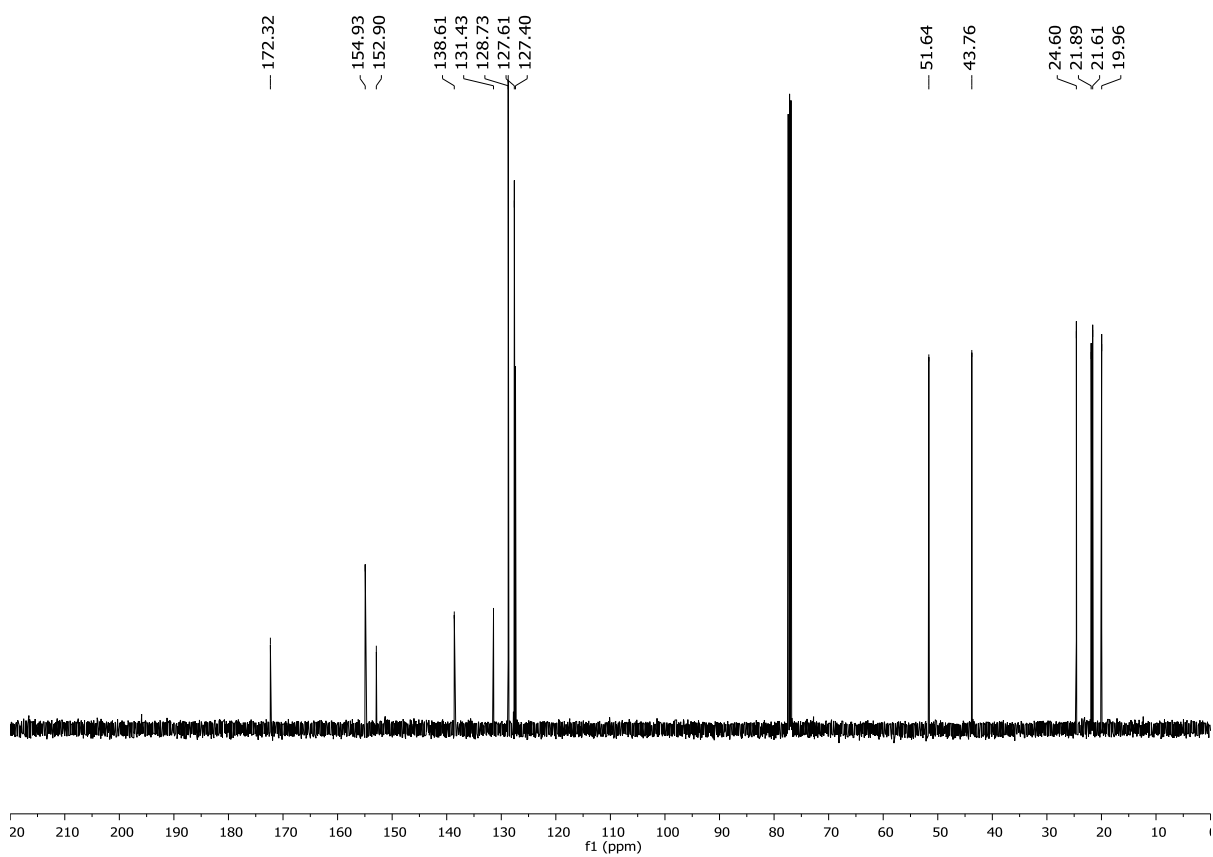

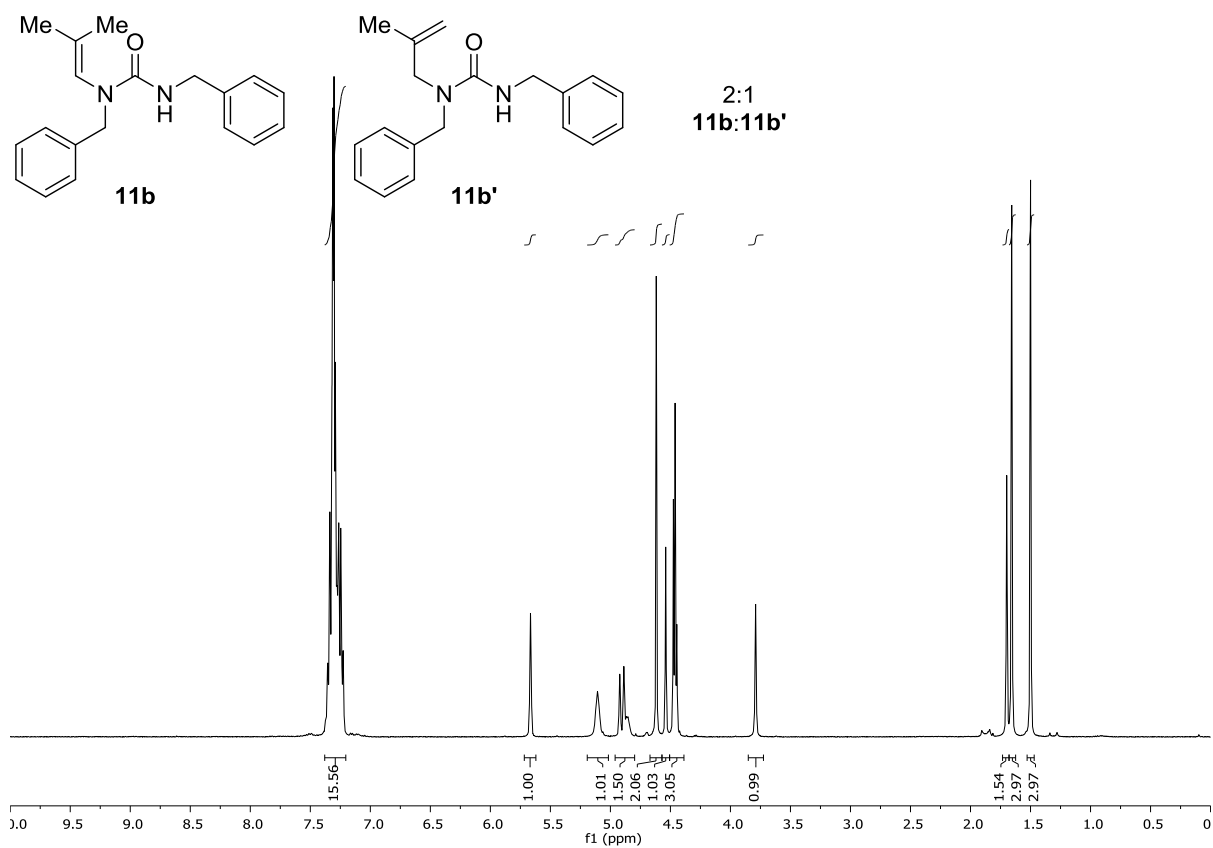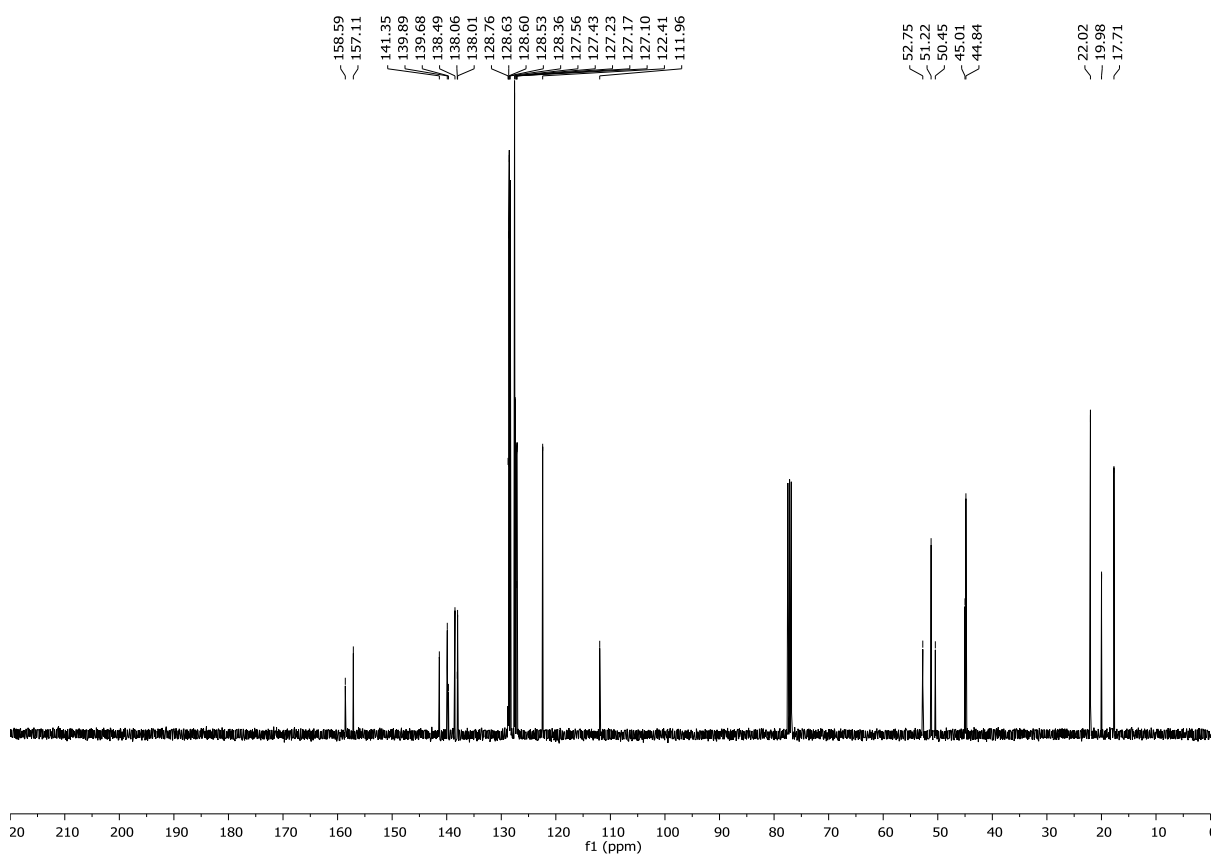



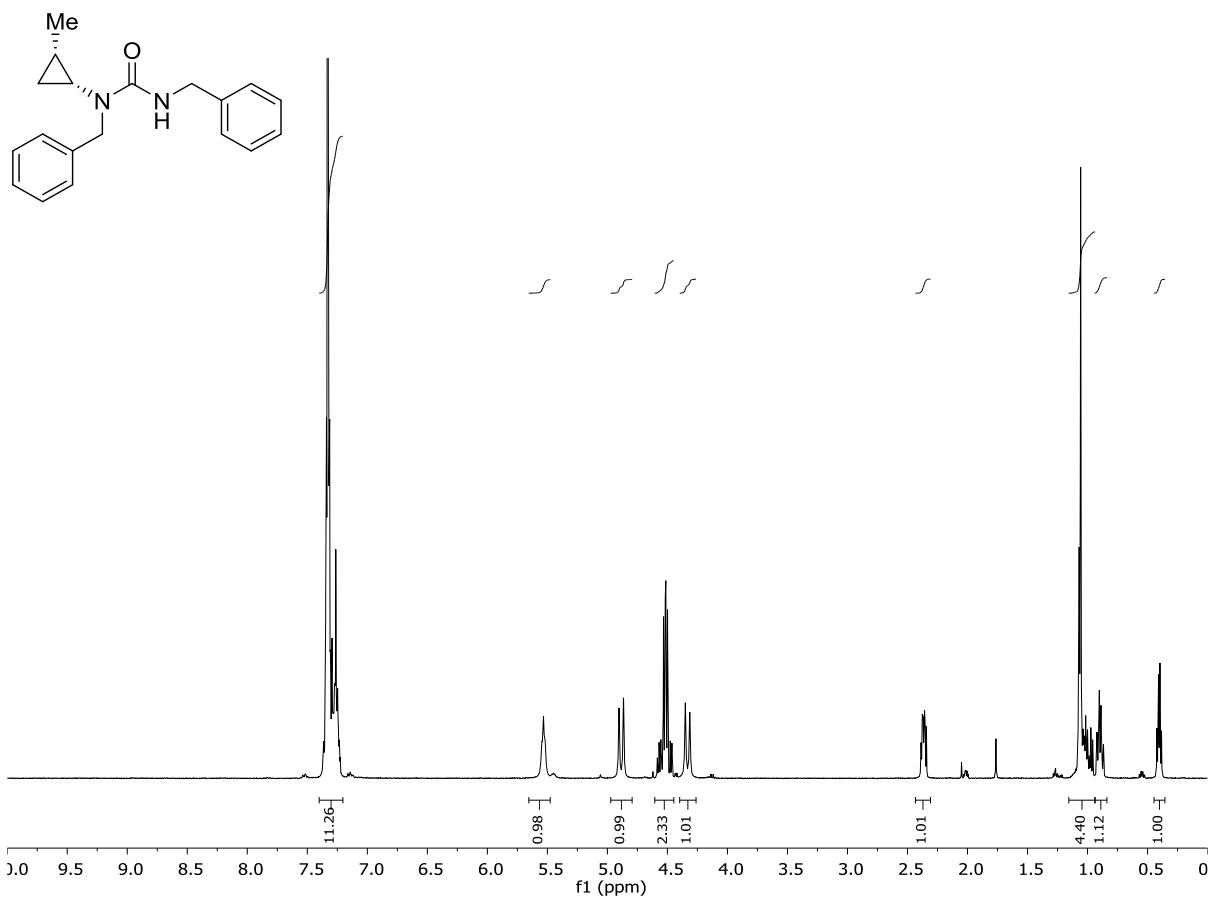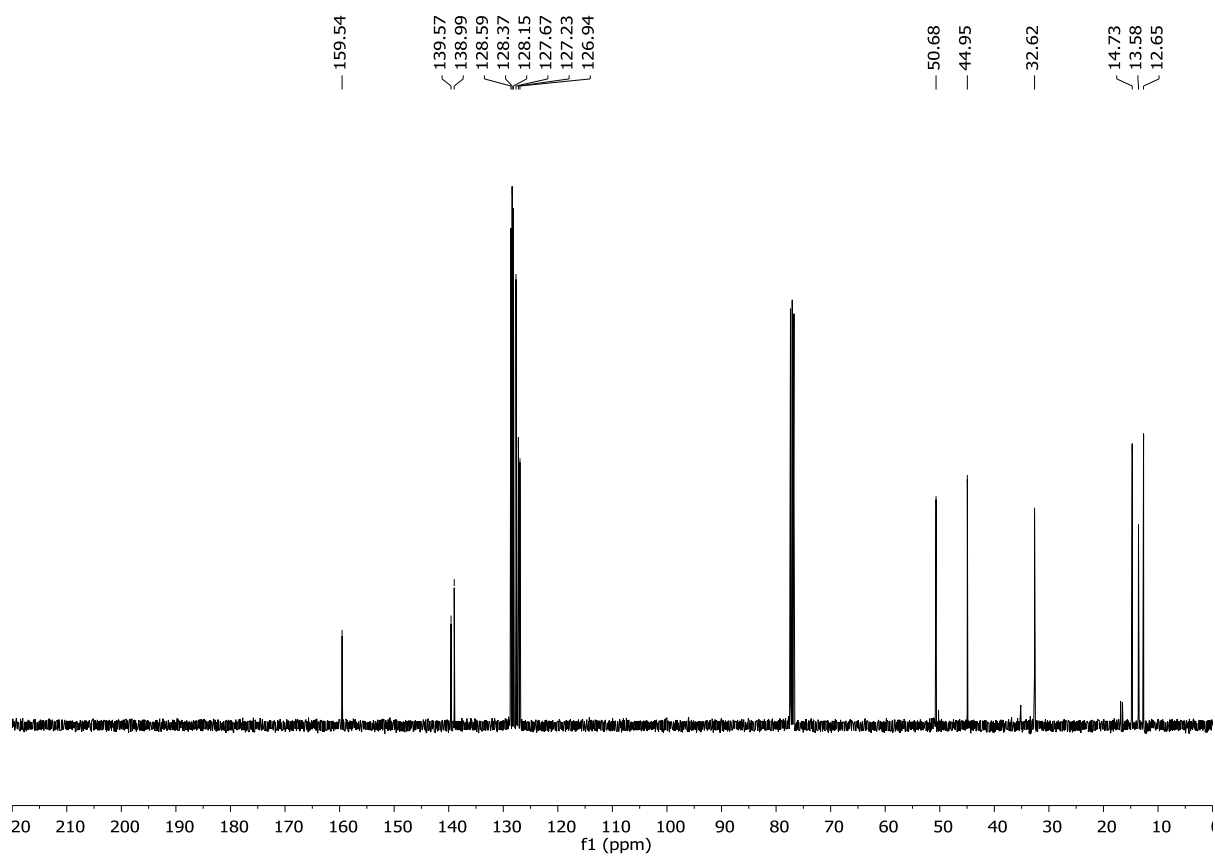

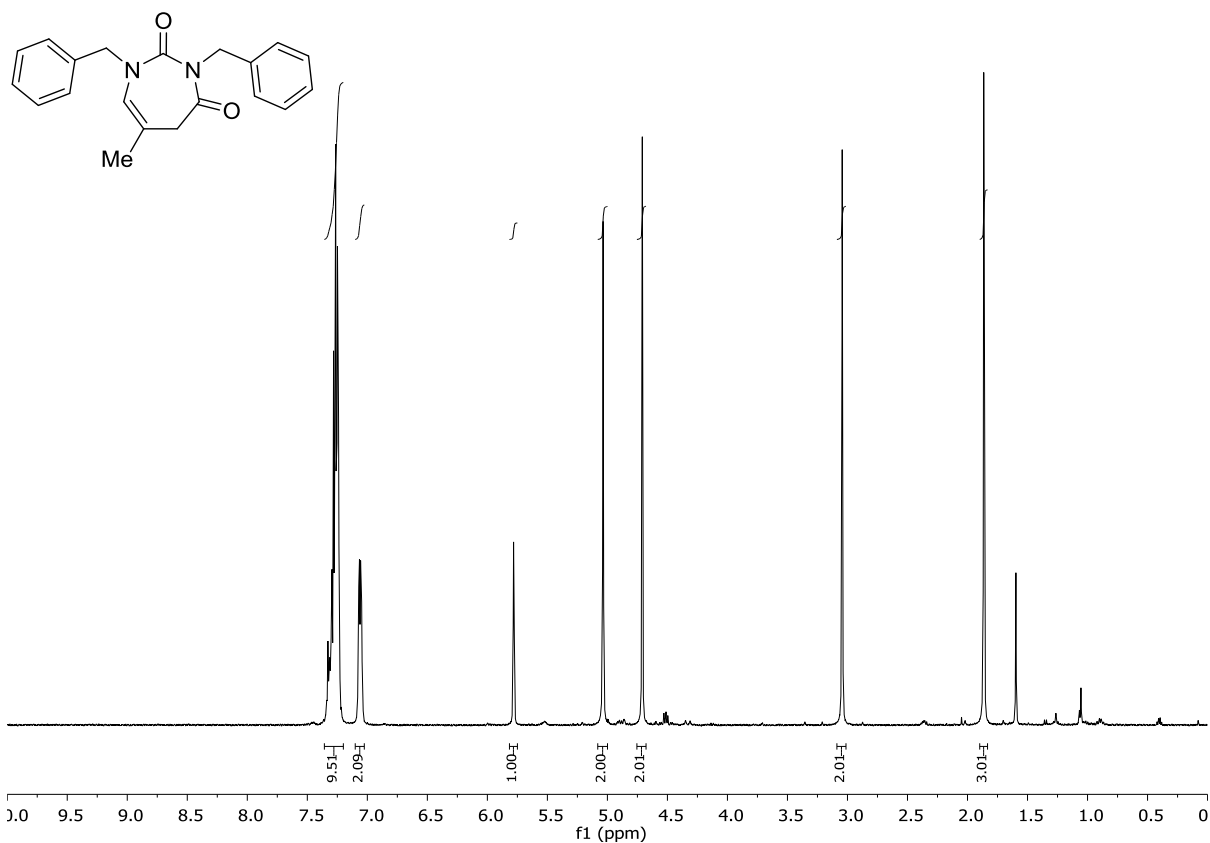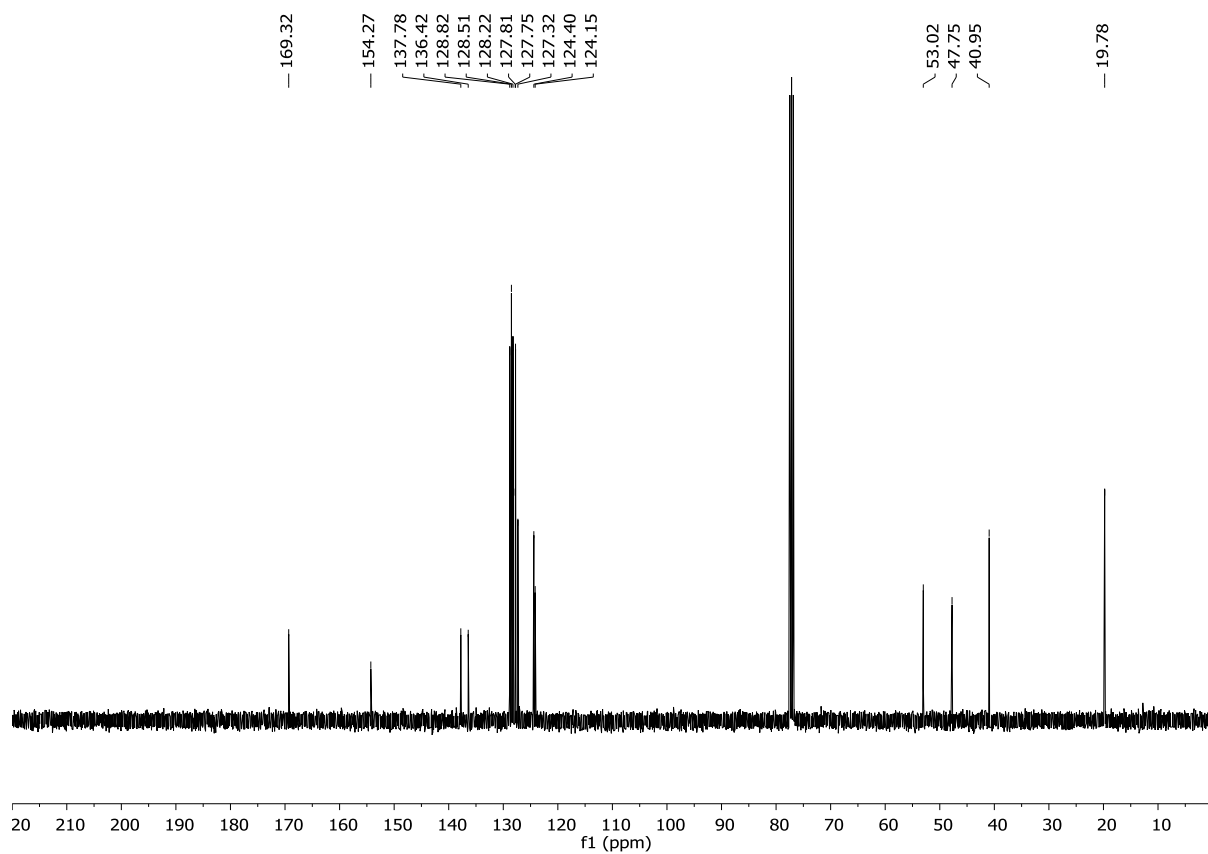

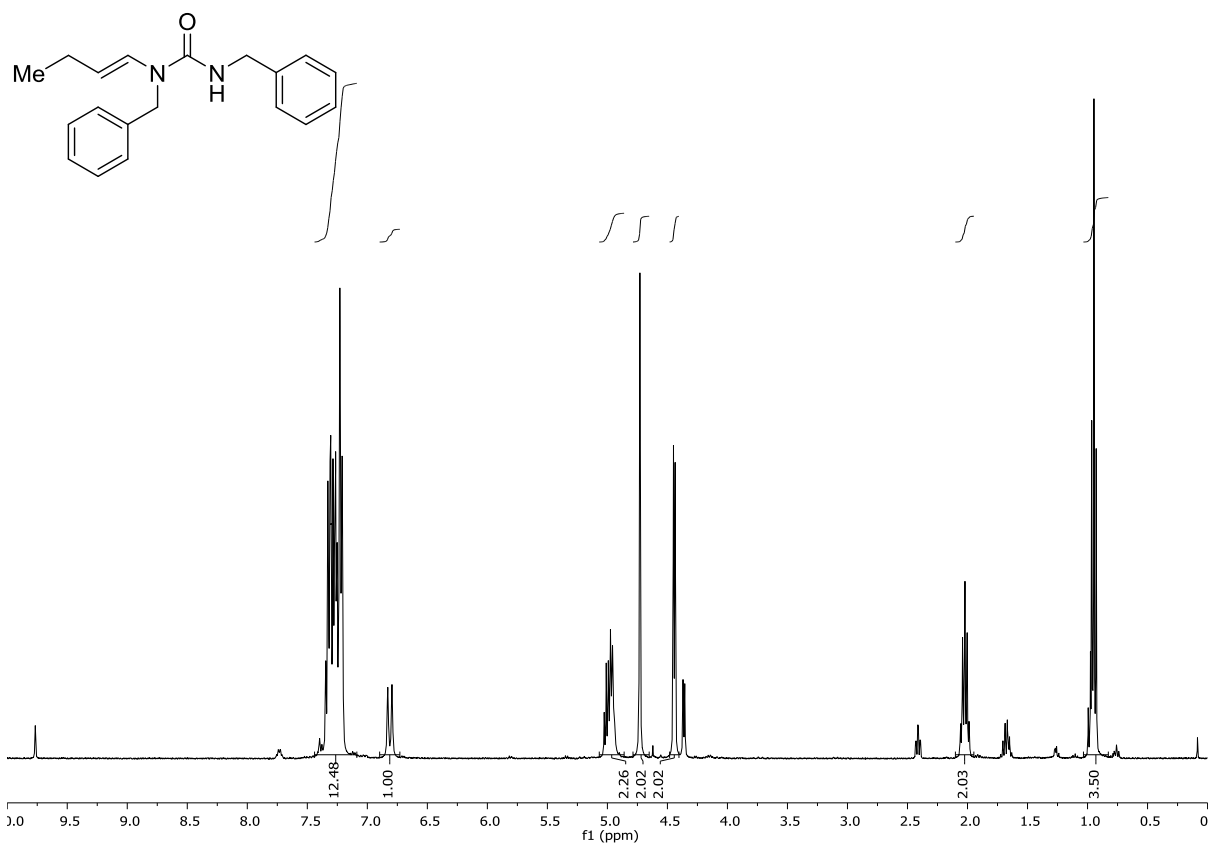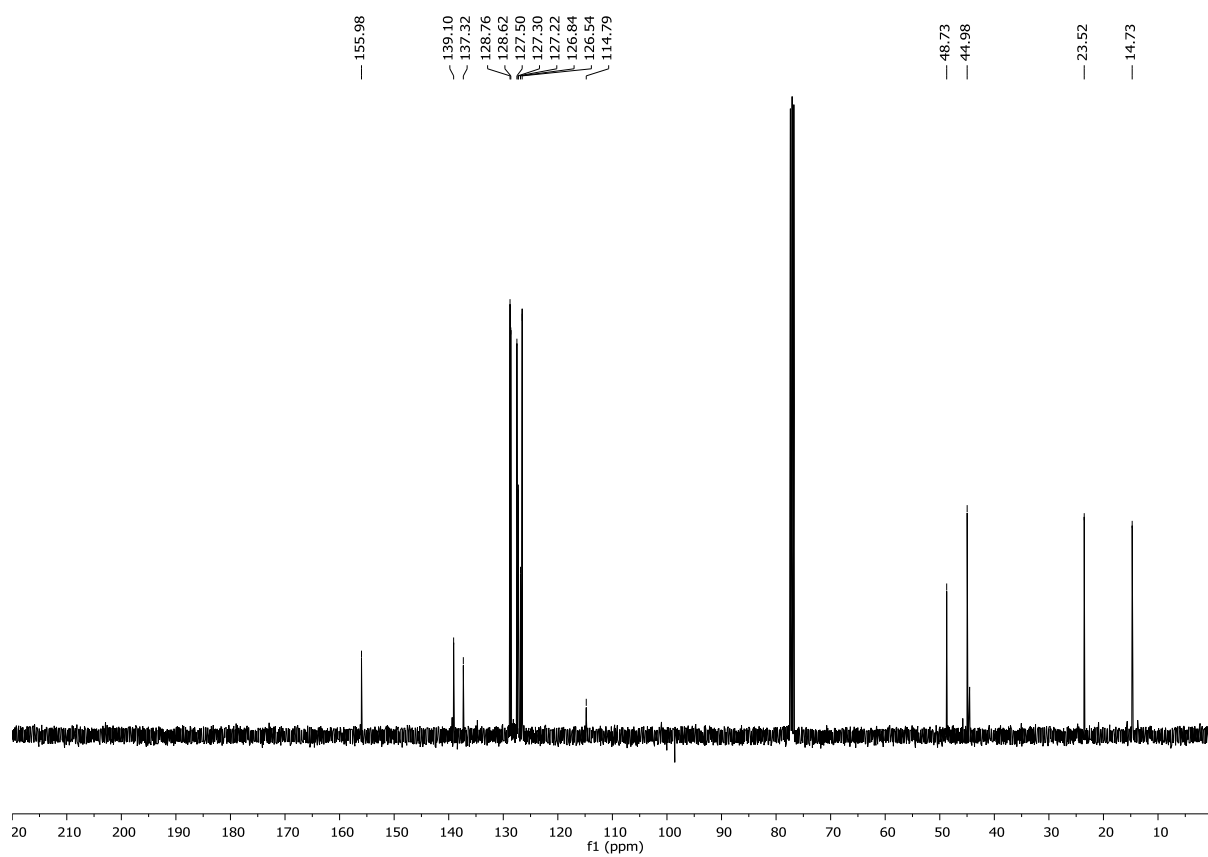

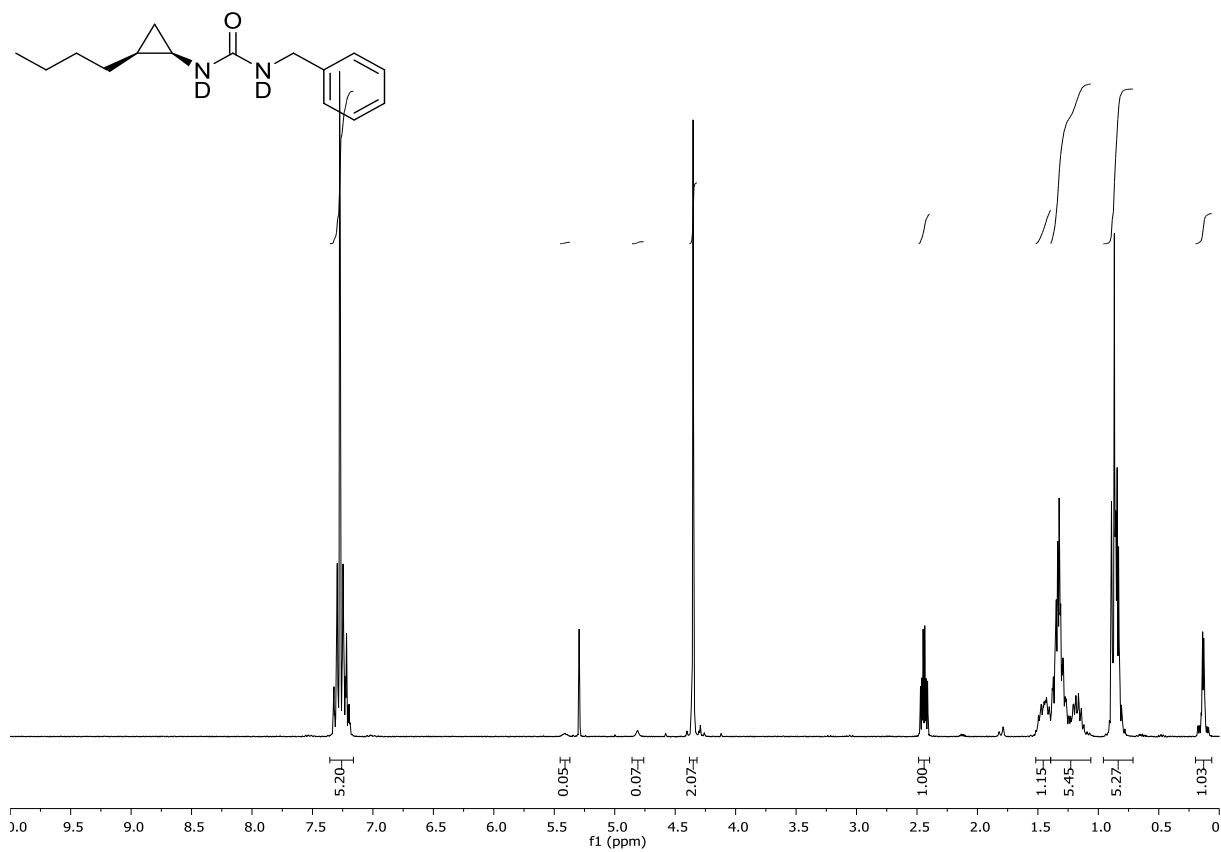

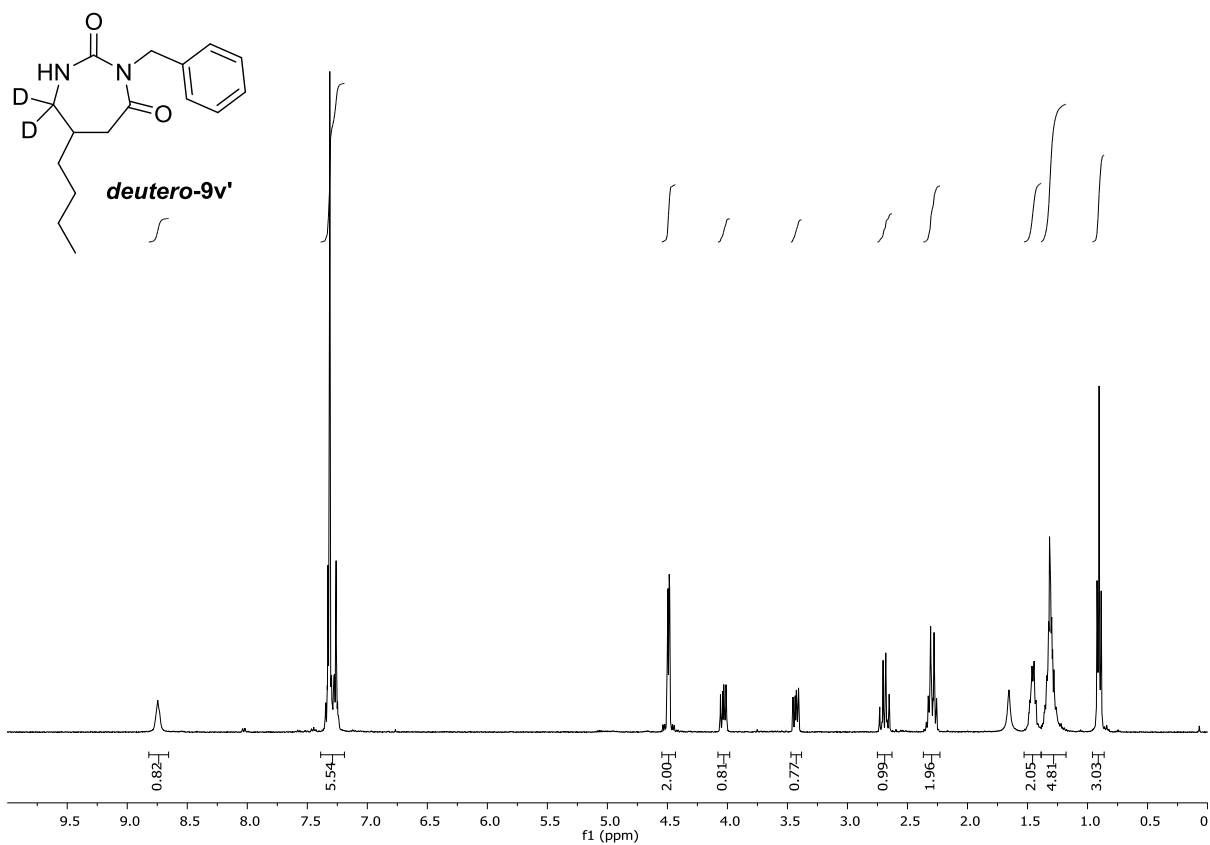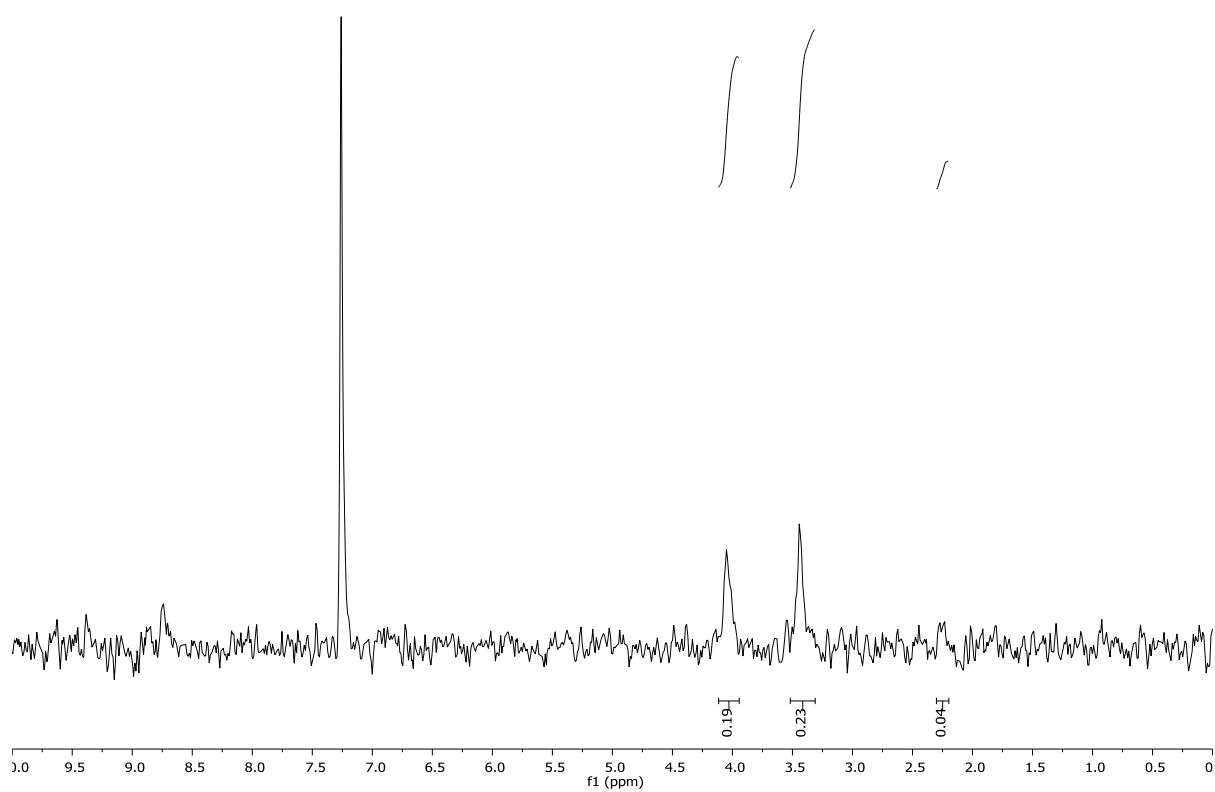

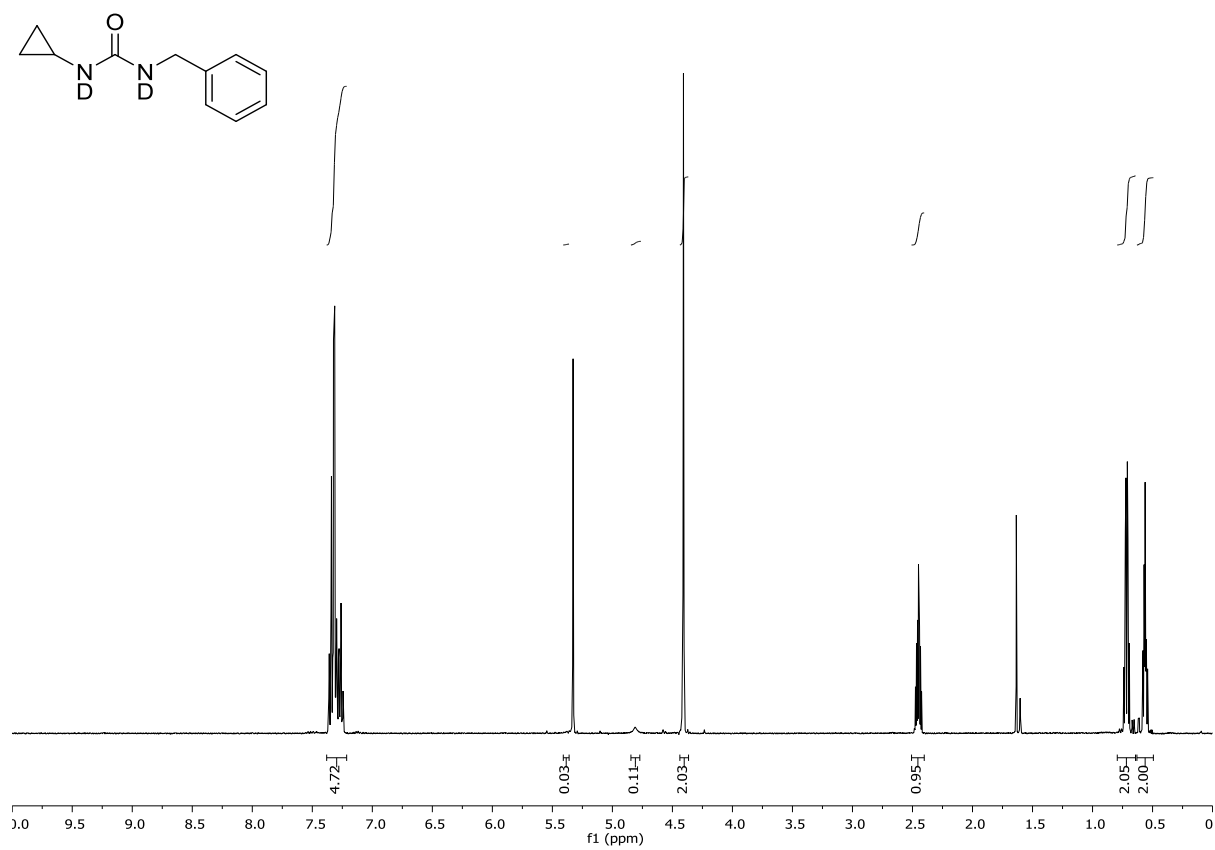

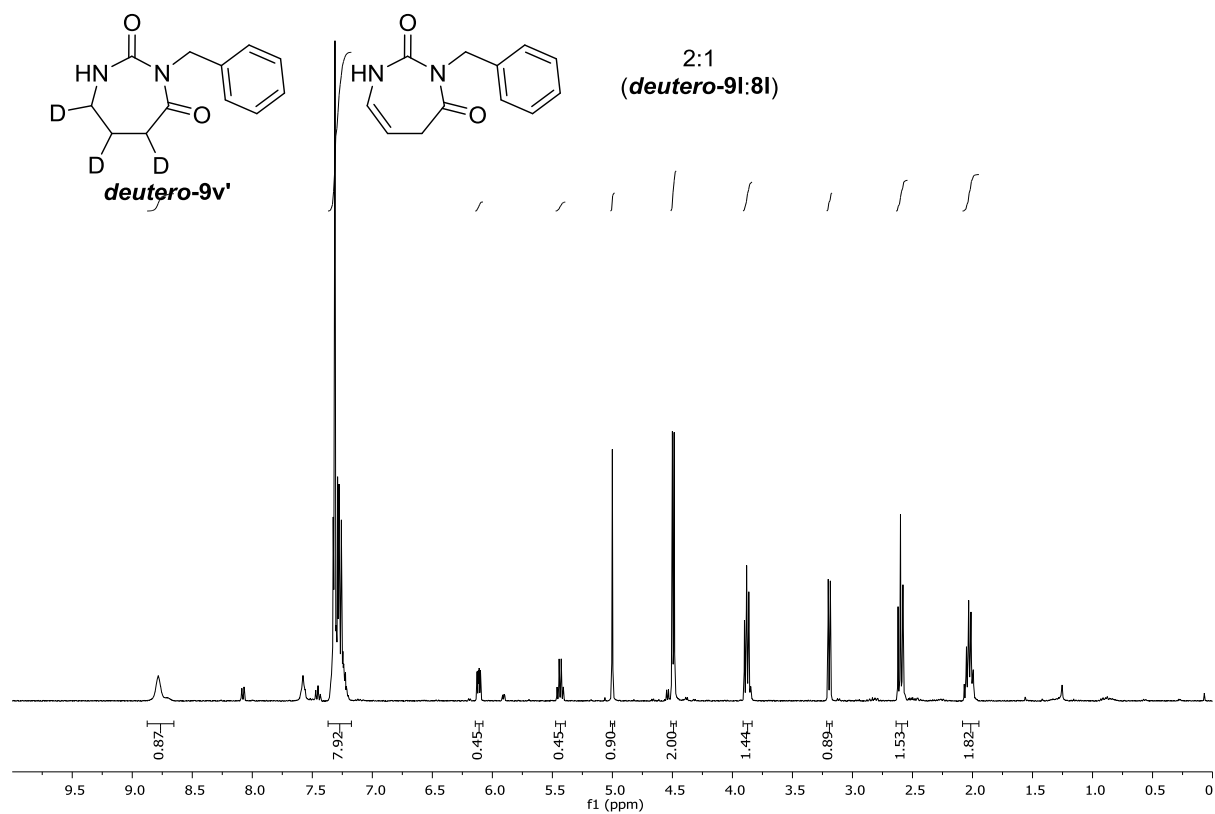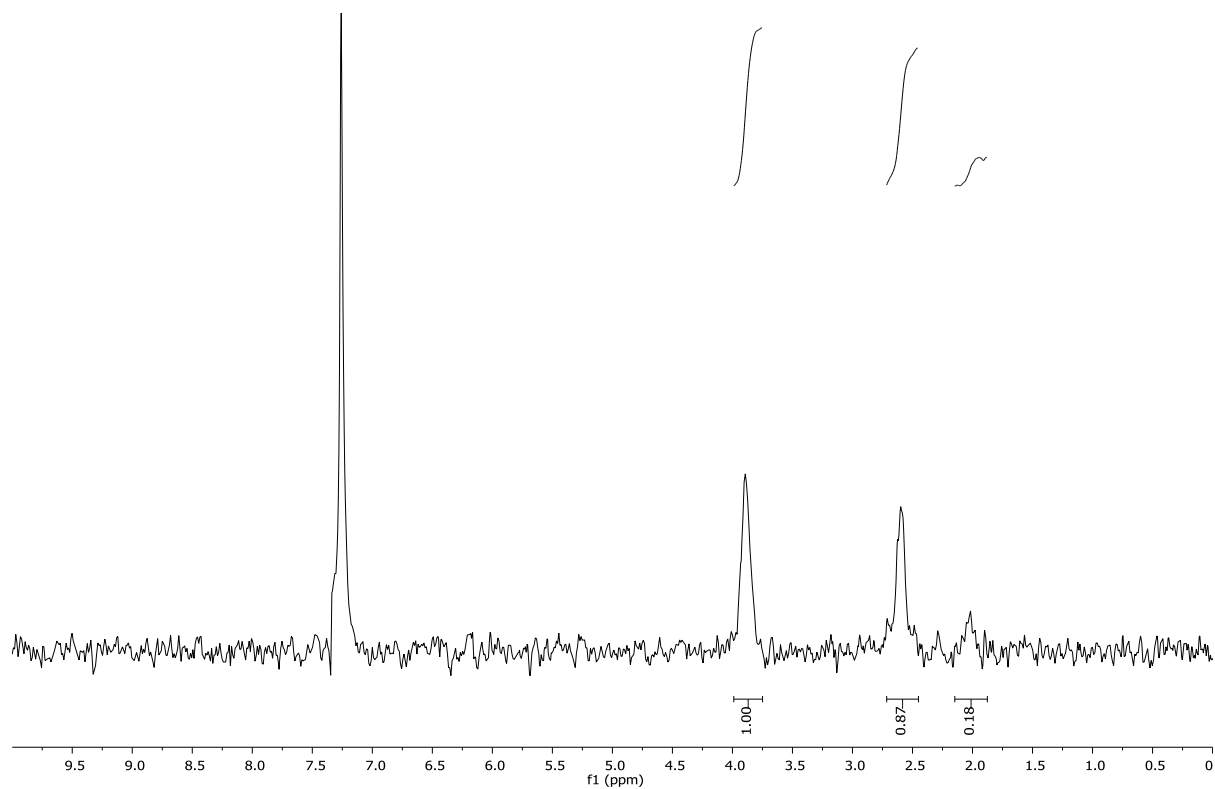

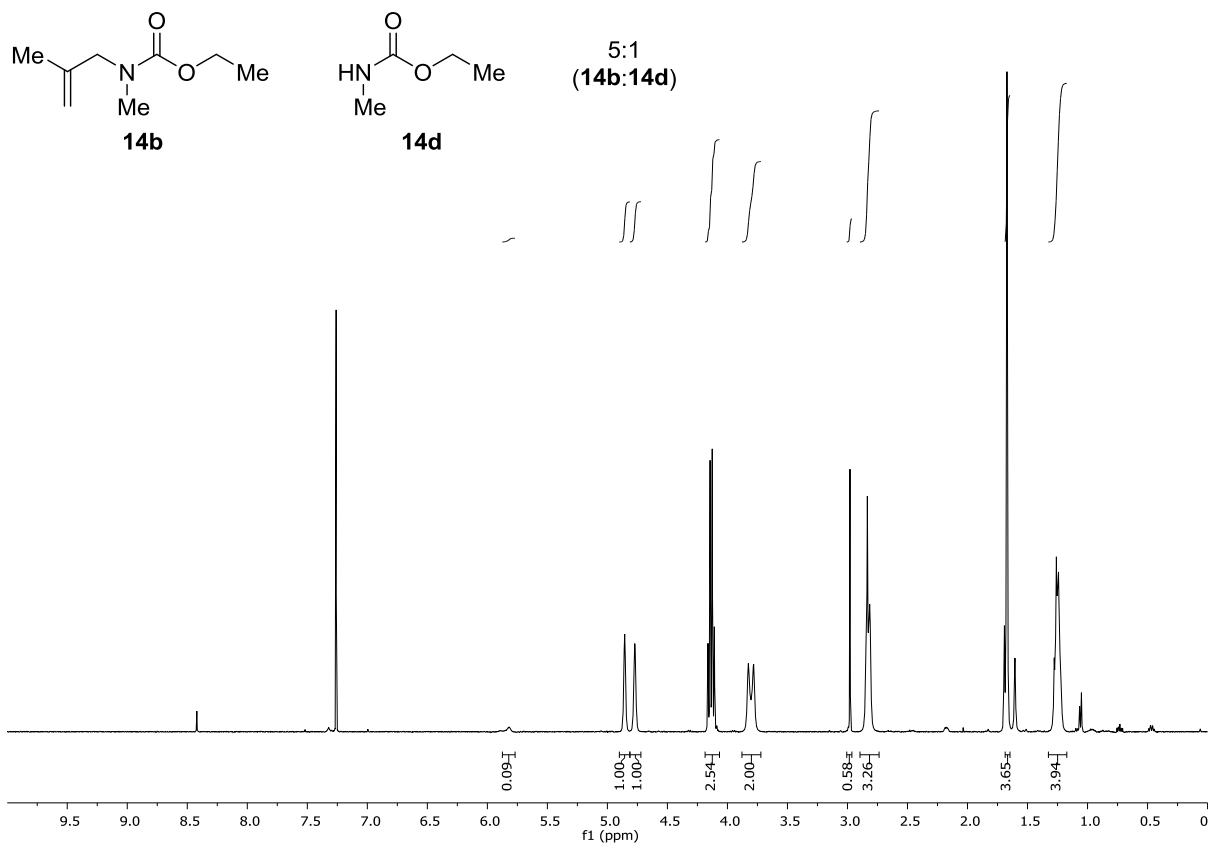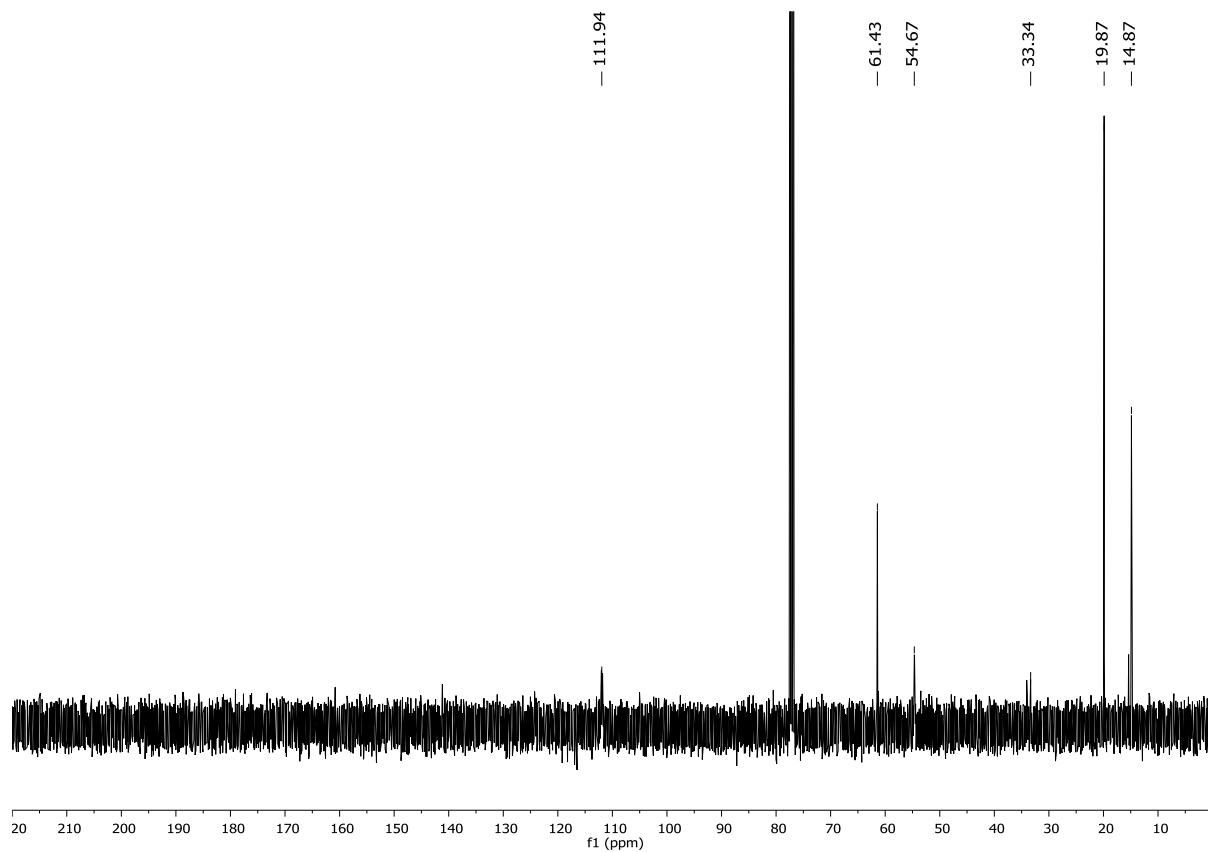



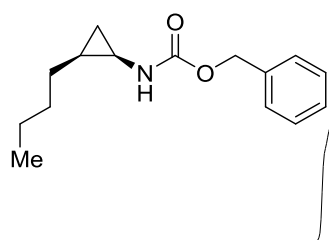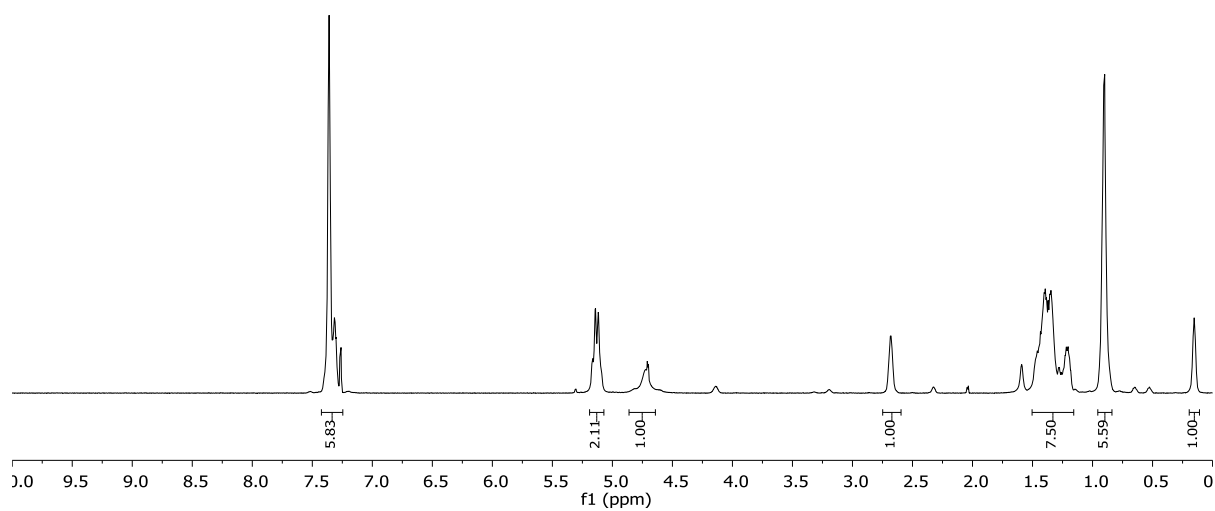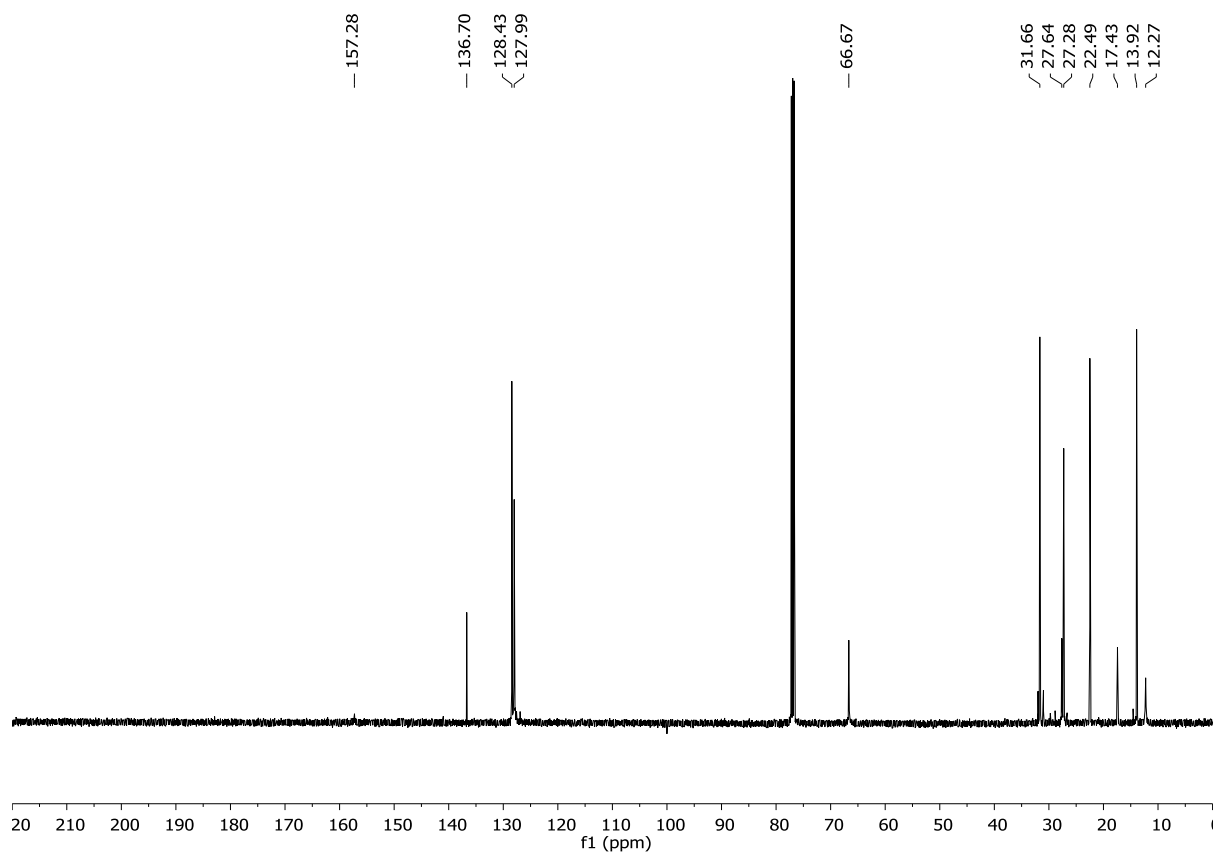

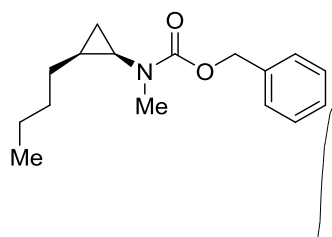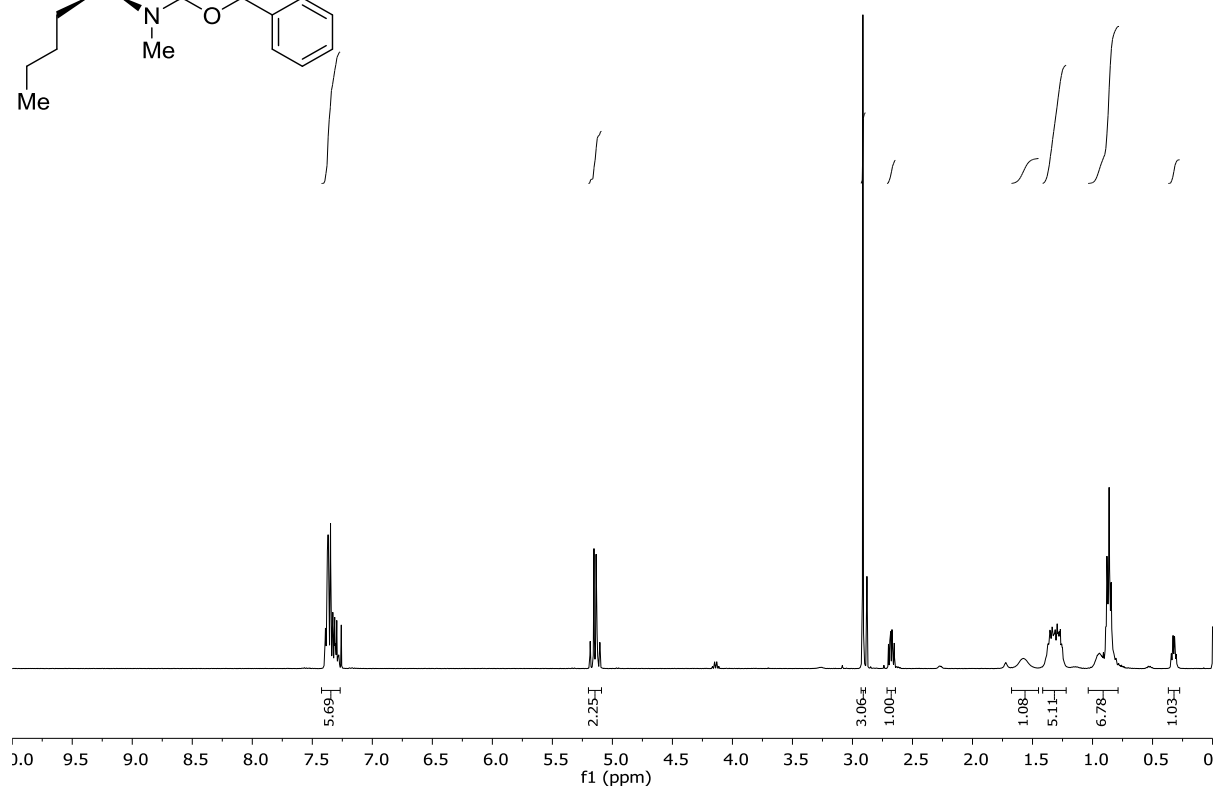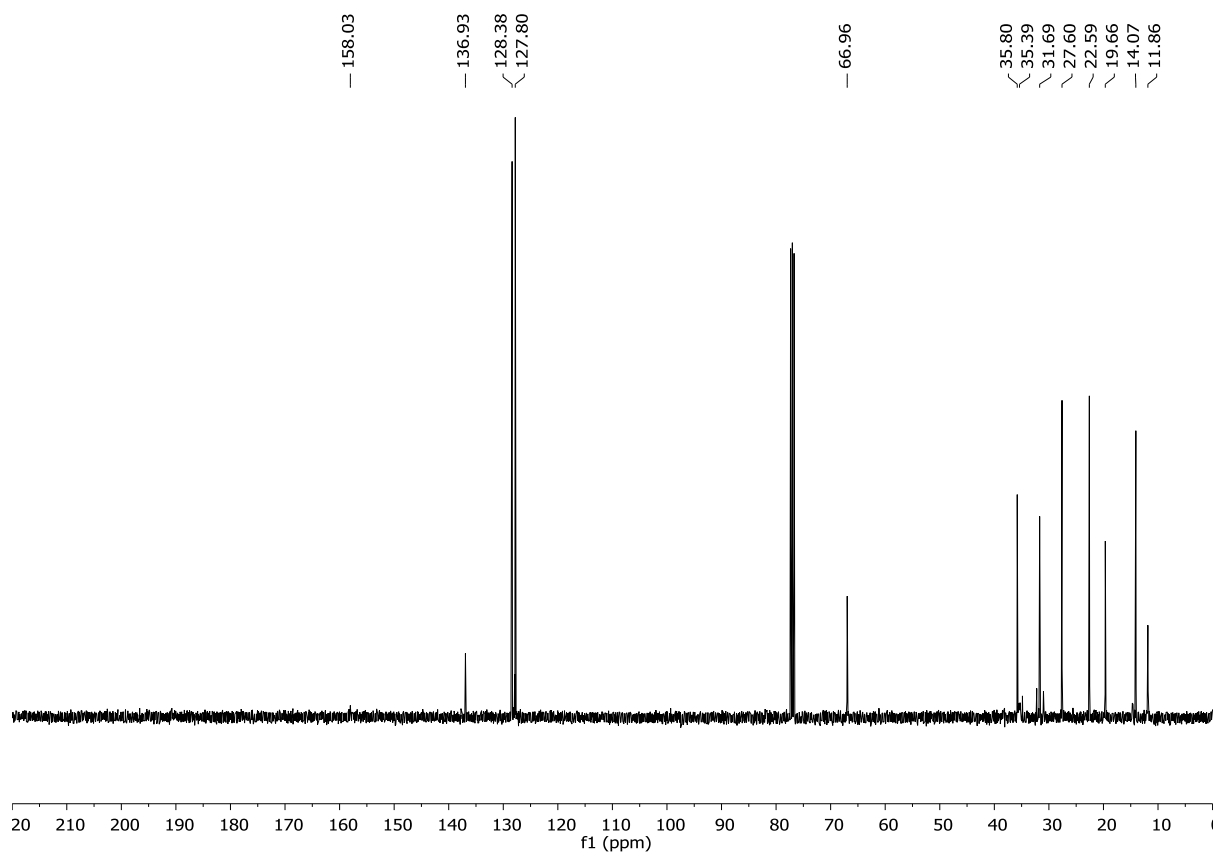

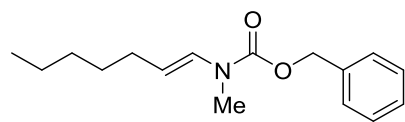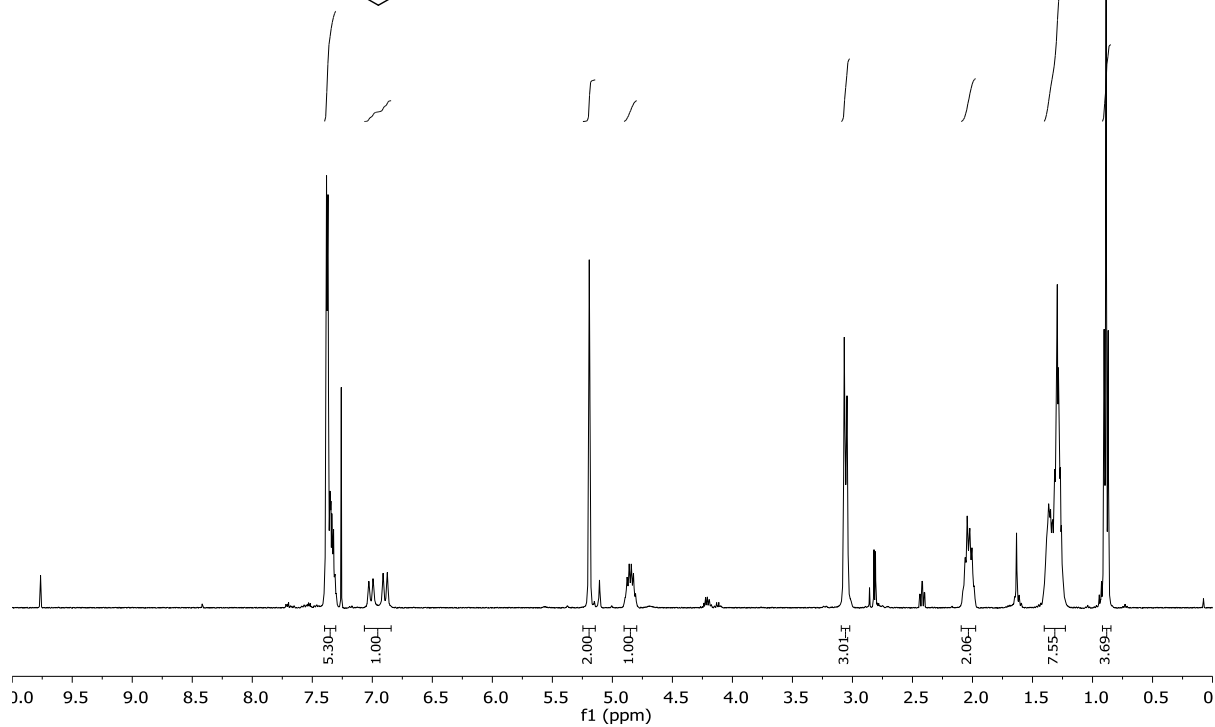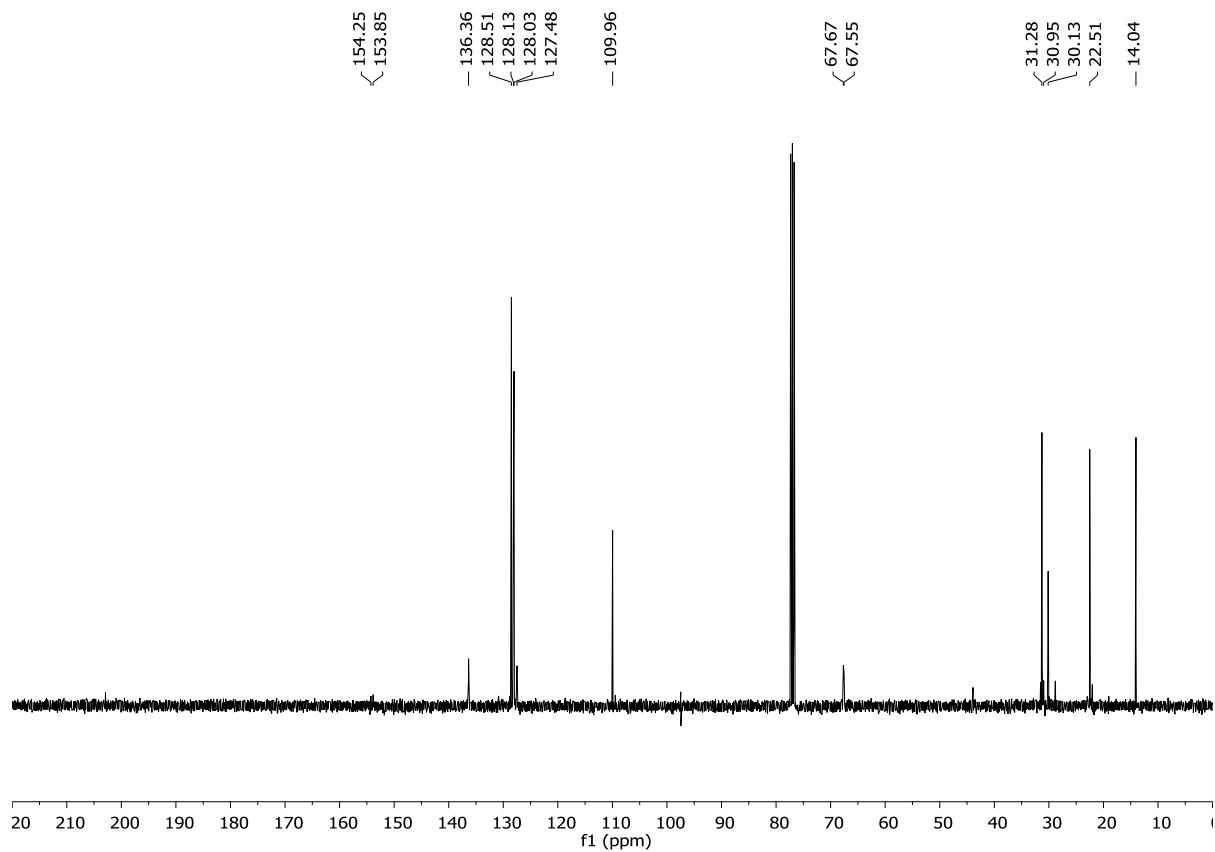

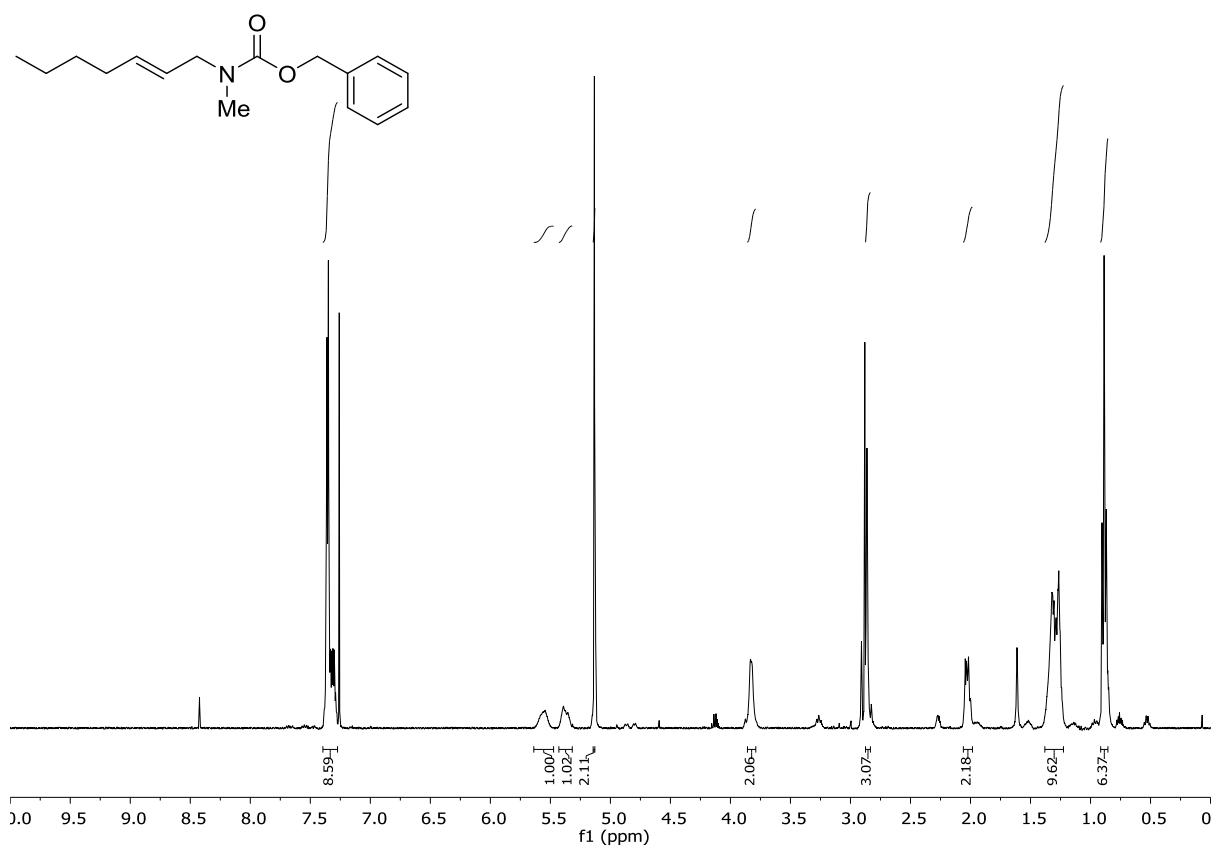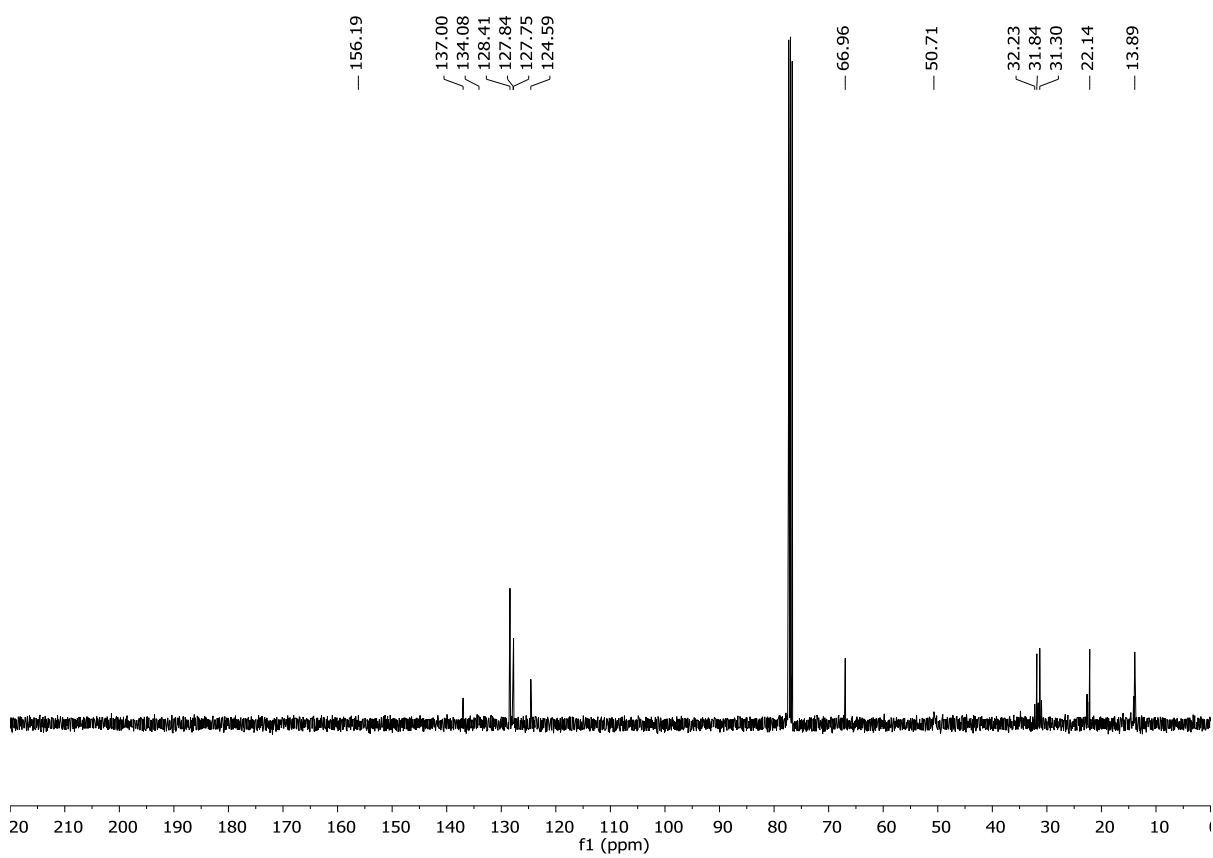

## References

1. Pangborn, A. B.; Giardello, M. A.; Grubbs, R. H.; Rosen, R. K.; Timmers, F. J. *Organometallics*, **1996**, *15*, 1518.
2. Nicolaou, K. C.; Mathison, C. J. N.; Montagnon, T. *J. Am. Chem. Soc.*, **2004**, *126*, 5192.
3. Shi, F.; Smith, M. R.; Maleczka, R. E. *Org. Lett.*, **2006**, *8*, 1411.
4. Cui, W.; Loeppky, R. N. *Tetrahedron*, **2001**, *57*, 2953.
5. Shaw, M. H.; Croft, R. A.; Whittingham, W. G.; Bower, J. F. *J. Am. Chem. Soc.*, **2015**, *137*, 8054.
6. Gastaldi, S.; Weinreb, S. M.; Stien, D. *J. Org. Chem.*, **2000**, *65*, 3239.
7. Delhay, L.; Merschaert, A.; Delbeke, P.; Briône, W. *Org. Process Rev. Dev.*, **2007**, *11*, 689.
8. Shaw, M. H.; McCreanor, N. G.; Whittingham, W. G.; Bower, J. F. *J. Am. Chem. Soc.*, **2015**, *137*, 463.
9. Ishikawa, S.; Sheppard, T. D.; D'Oyley, J. M.; Kamimura, A.; Motherwell, W. B. *Angew. Chem. Int. Ed.*, **2013**, *52*, 10060.
